# Supplementary material for: Novel promoters and coding first exons in DLG2 linked to developmental disorders and intellectual disability
Source: PubMed Central journal article supplement (PMC5518101; doi:10.1186/s13073-017-0452-y), 2017-07-19
Supplement: 13073_2017_452_MOESM1_ESM.pdf [file 13073_2017_452_MOESM1_ESM.pdf]

## Additional file 1

### Novel promoters and coding first exons in *DLG2* linked to developmental disorders and intellectual disability

Claudio Reggiani<sup>1,2</sup>, Sandra Coppens<sup>3,4,§</sup>, Tayeb Sekhara<sup>4,24,§</sup>, Ivan Dimov<sup>5,§</sup>, Bruno Pichon<sup>6</sup>, Nicolas Lufin<sup>1,6</sup>, Marie-Claude Addor<sup>7</sup>, Elga Fabia Belligni<sup>8</sup>, Maria Cristina Digilio<sup>9</sup>, Flavio Faletta<sup>10</sup>, Giovanni Battista Ferrero<sup>8</sup>, Marion Gerard<sup>11</sup>, Bertrand Isidor<sup>12</sup>, Shelagh Joss<sup>13</sup>, Florence Niel-Bütschi<sup>7</sup>, Maria Dolores Perrone<sup>10,25</sup>, Florence Petit<sup>14</sup>, Alessandra Renieri<sup>15,16</sup>, Serge Romana<sup>17,18</sup>, Alexandra Topa<sup>19</sup>, Joris Robert Vermeesch<sup>20</sup>, Tom Lenaerts<sup>1,2,21</sup>, Georges Casimir<sup>22</sup>, Marc Abramowicz<sup>1,6</sup>, Gianluca Bontempi<sup>1,2,†</sup>, Catheline Vilain<sup>1,6,23,†</sup>, Nicolas Deconinck<sup>4,†</sup> and Guillaume Smits<sup>1,6,23,†,\*</sup>

<sup>1</sup>Interuniversity Institute of Bioinformatics in Brussels ULB-VUB, Brussels, 1050, Belgium.

<sup>2</sup>Machine Learning Group, Université Libre de Bruxelles, Brussels, 1050, Belgium.

<sup>3</sup>Department of Neurology, Hôpital Erasme, Université Libre de Bruxelles, Brussels, 1070, Belgium.

<sup>4</sup>Neuropediatrics, Hôpital Universitaire des Enfants Reine Fabiola, Université Libre de Bruxelles, Brussels, 1020, Belgium.

<sup>5</sup>Faculté de Médecine, Université Libre de Bruxelles, Brussels, 1070, Belgium.

<sup>6</sup>ULB Center of Medical Genetics, Hôpital Erasme, Université Libre de Bruxelles, Brussels, 1070, Belgium.

<sup>7</sup>Service de Médecine Génétique, Centre Hospitalier Universitaire Vaudois CHUV, Lausanne, 1011, Switzerland.

<sup>8</sup>Department of Public Health and Pediatrics, University of Torino, Turin, 10126, Italy.

<sup>9</sup>Medical Genetics, Bambino Gesù Pediatric Hospital, Rome, 00165, Italy.

<sup>10</sup>S.C. Medical Genetics, Institute for Maternal and Child Health - IRCCS "Burlo Garofolo", Trieste, 34137, Italy.

<sup>11</sup>Laboratory of Medical Genetics, CHU de Caen - Hôpital Clémenceau, Caen, 14033 Caen Cedex, France.

<sup>12</sup>Service de Génétique Médicale, CHU de Nantes, Nantes, 44093 Nantes Cedex 1, France.

<sup>13</sup>West of Scotland Clinical Genetics Service, South Glasgow University Hospitals, Glasgow, G51 4TF, United Kingdom.

<sup>14</sup>Service de Génétique, CHRU de Lille - Hôpital Jeanne de Flandre, Lille, 59000, France.

<sup>15</sup>Medical Genetics, University of Siena, Siena, 53100, Italy.

<sup>16</sup>Genetica Medica, Azienda Ospedaliera Universitaria Senese, Siena, 53100, Italy.

<sup>17</sup>Service d'Histologie Embryologie Cytogénétique, Hôpital Necker Enfants Malades, Paris, 75015, France.

<sup>18</sup>Université Paris Descartes - Institut IMAGINE, Paris, 75015, France.

<sup>19</sup>Department of Clinical Pathology and Genetics, Sahlgrenska University Hospital, Gothenburg, 413 45, Sweden.

<sup>20</sup>Department of Human Genetics, University of Leuven, Leuven, 3000, Belgium.

<sup>21</sup>AI lab, Vrije Universiteit Brussel, Brussels, 1050, Belgium.

<sup>22</sup>Pediatrics, Hôpital Universitaire des Enfants Reine Fabiola, Université Libre de Bruxelles, Brussels, 1020, Belgium.

<sup>23</sup>Genetics, Hôpital Universitaire des Enfants Reine Fabiola, Université Libre de Bruxelles, Brussels, 1020, Belgium.

<sup>24</sup>Present address: Neuropediatrics, Clinique Saint-Anne Saint-Rémy - CHIREC, Brussels, 1070, Belgium.

<sup>25</sup>Present address: Assisted Fertilization Department, Casa di Cura Città di Udine, Udine, 33100, Italy.

§,†These authors contributed equally to this work

\*Correspondence: guillaume.smits@huderf.be

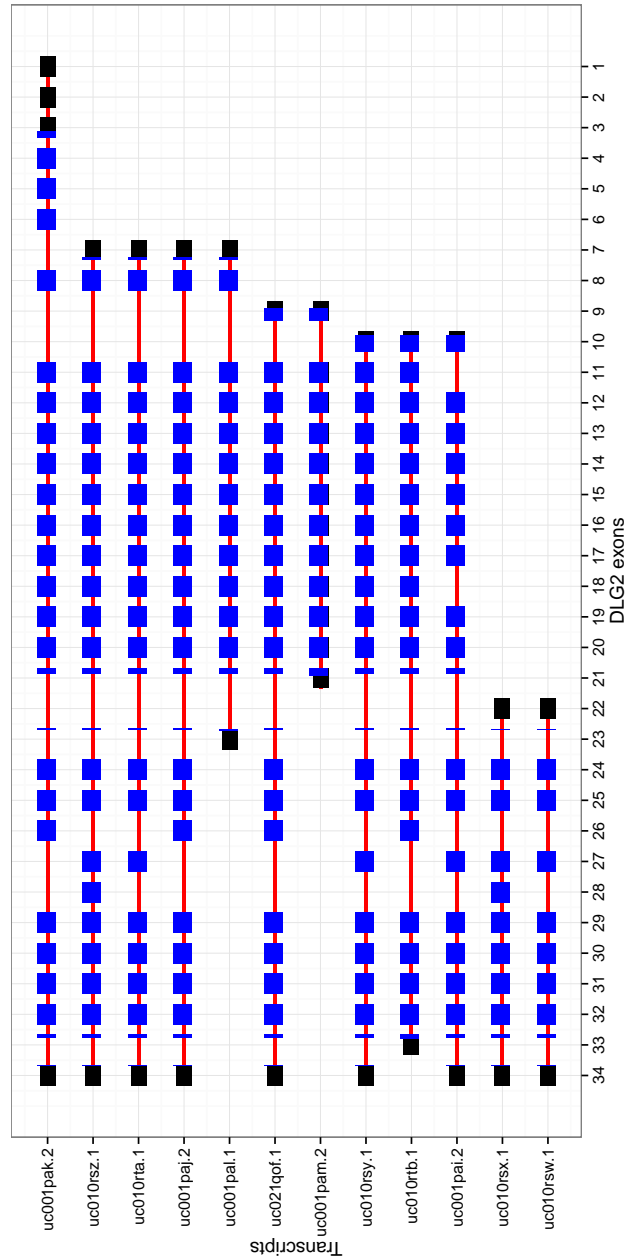

Figure S1: *DLG2* isoforms schematic representation using UCSC data. This representation visualizes exons across all isoforms and identifies which ones are shared. Each line represents a UCSC *DLG2* isoform, which is a combination of several components: blue boxes are cds regions, black boxes are non-coding regions such as 3'-UTR and 5'-UTR. Red lines are introns. In the y-axis are reported isoform names, *uc001pak.2* is the reference one. Many exons are shared across isoforms and considering that *DLG2* is an antisense gene, we numbered unique exons from right to left (reported in the x-axis). In Reggiani *et al.*, we refer to these exons using such numbers.

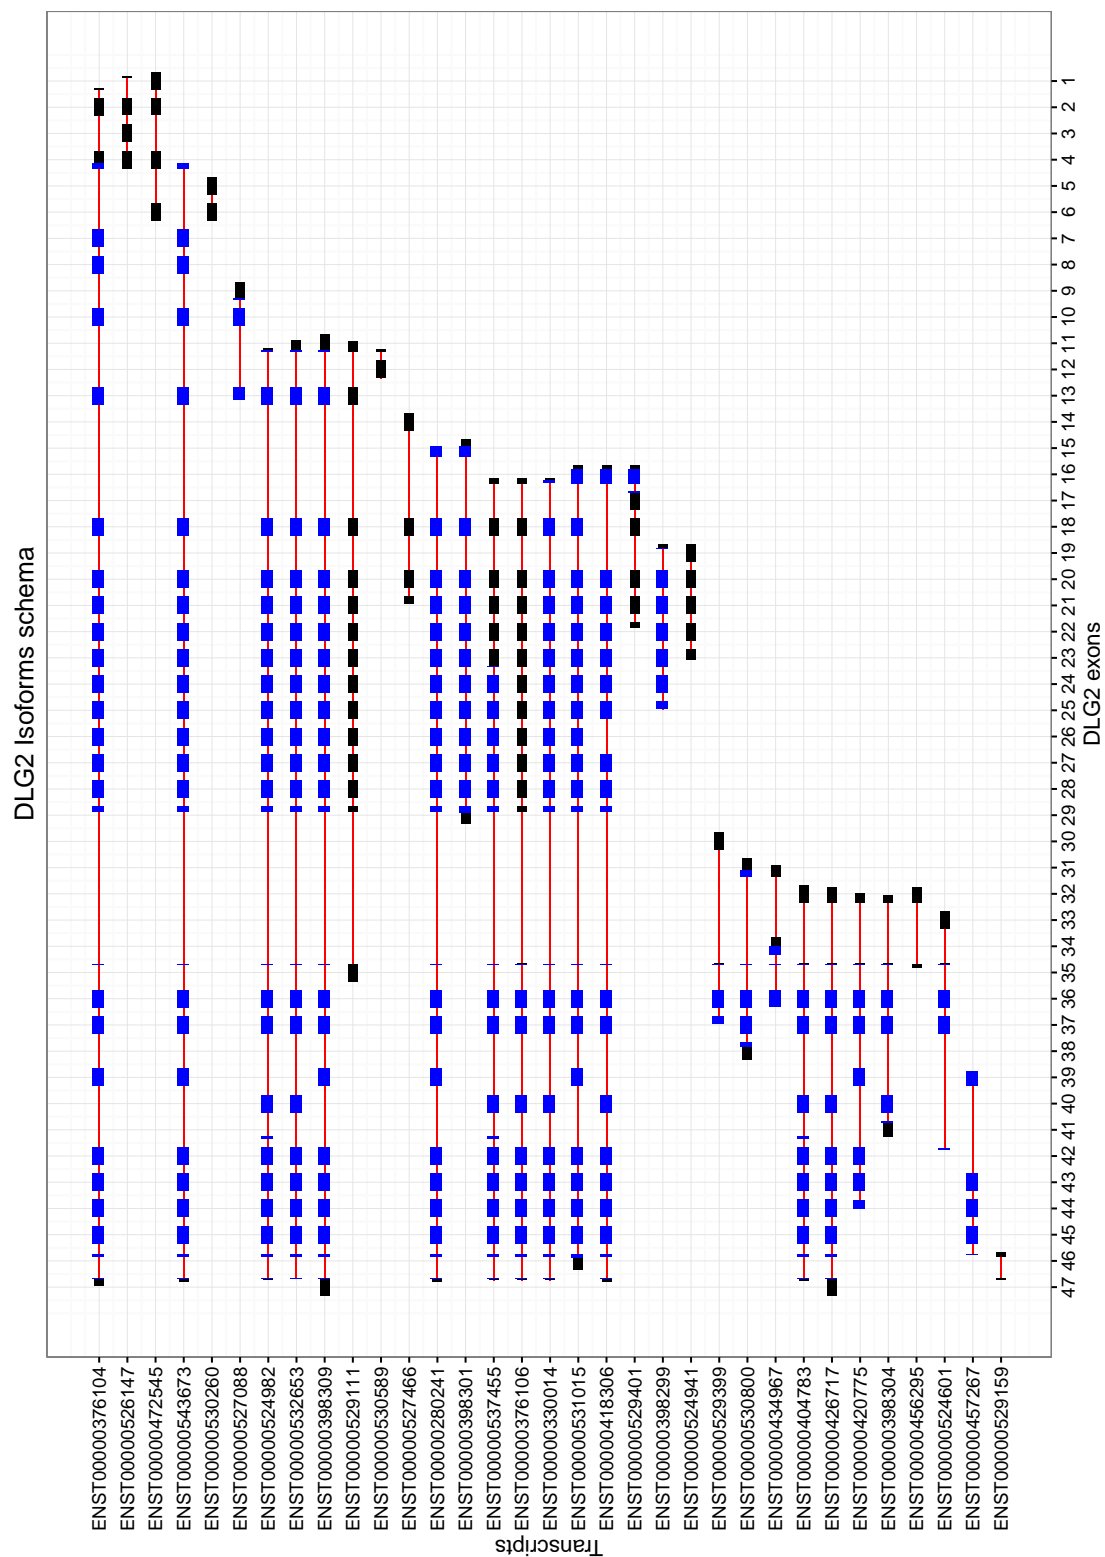

Figure S2: *DLG2* isoforms schematic representation using Ensembl data. This representation visualizes exons across all isoforms and identifies which ones are shared. Each line represents a Ensembl *DLG2* isoform, which is a combination of several components: blue boxes are cds regions, black boxes are non-coding regions such as 3'-UTR and 5'-UTR. Red lines are introns. In the y-axis are reported isoform names. Many exons are shared across isoforms and considering that *DLG2* is an antisense gene, we numbered unique exons from right to left (reported in the x-axis).

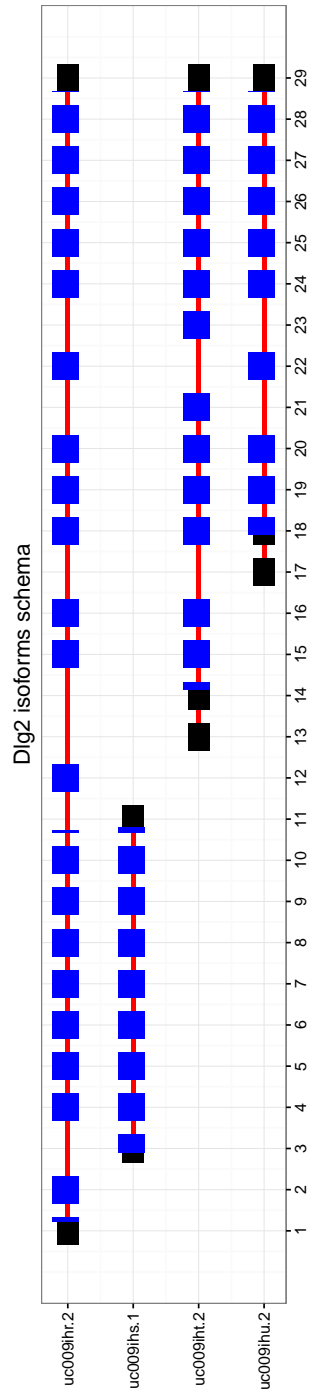

Figure S3: *Dlg2* isoforms schematic representation using UCSC data.

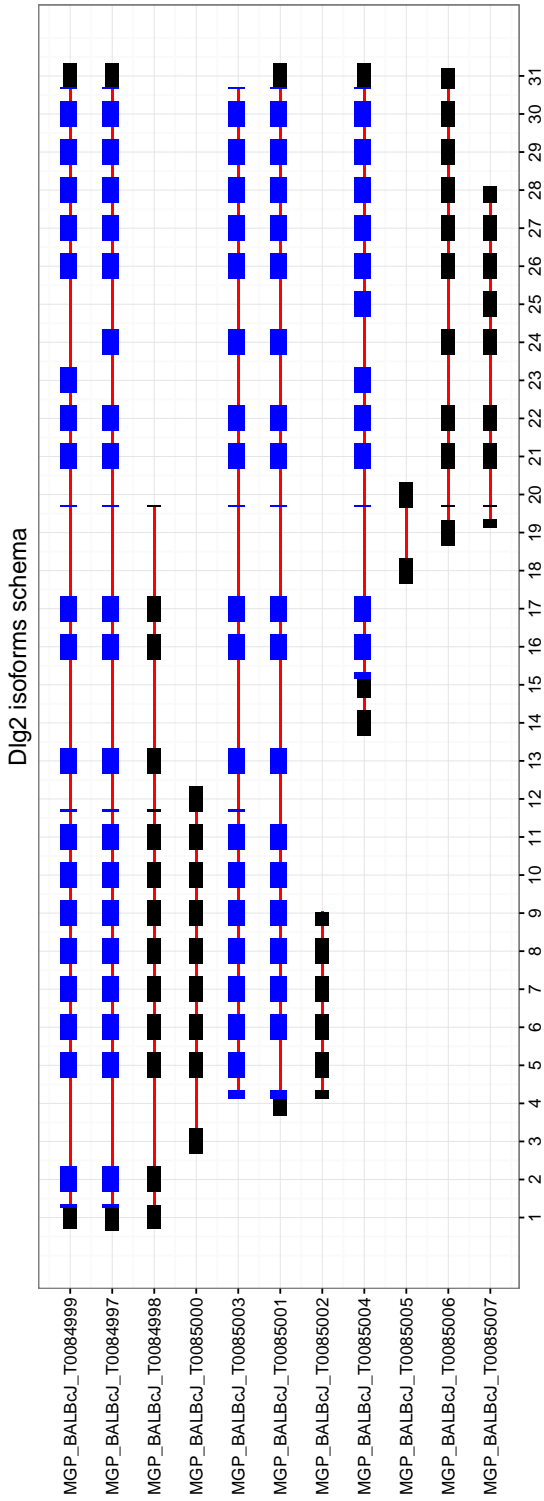

Figure S4: *Dlg2* isoforms schematic representation using Ensembl data (mm10, BALB/cJ strain).

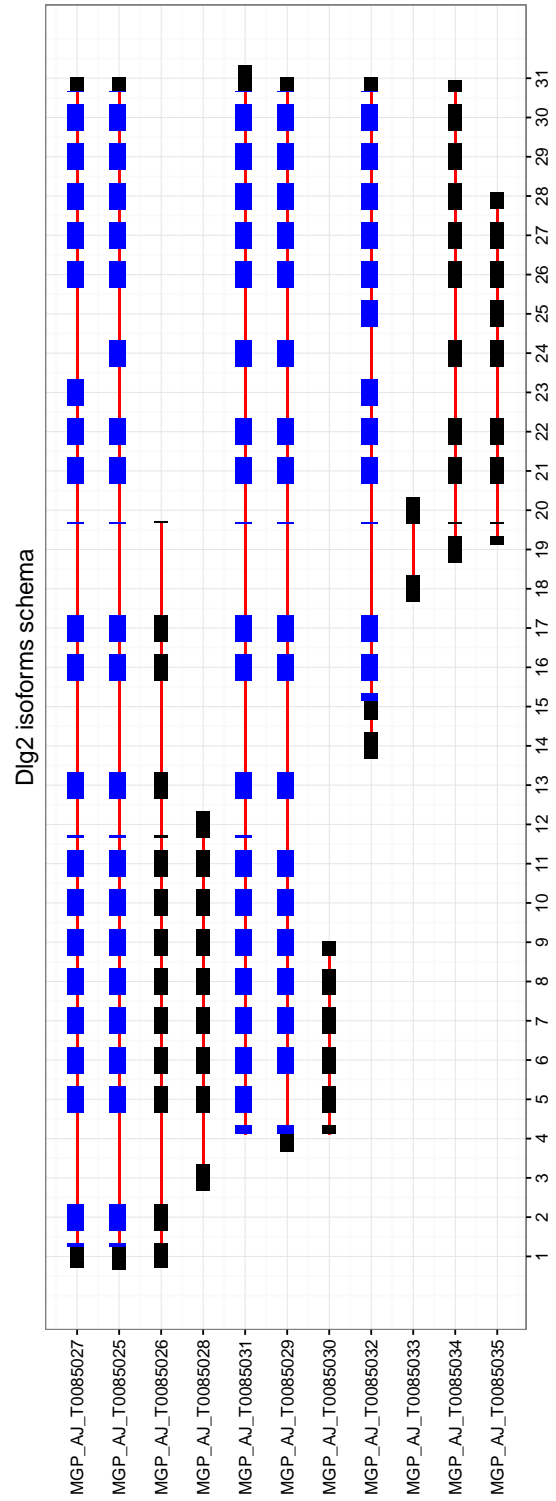

Figure S5: *Dlg2* isoforms schematic representation using Ensembl data (mm10, A/J strain).

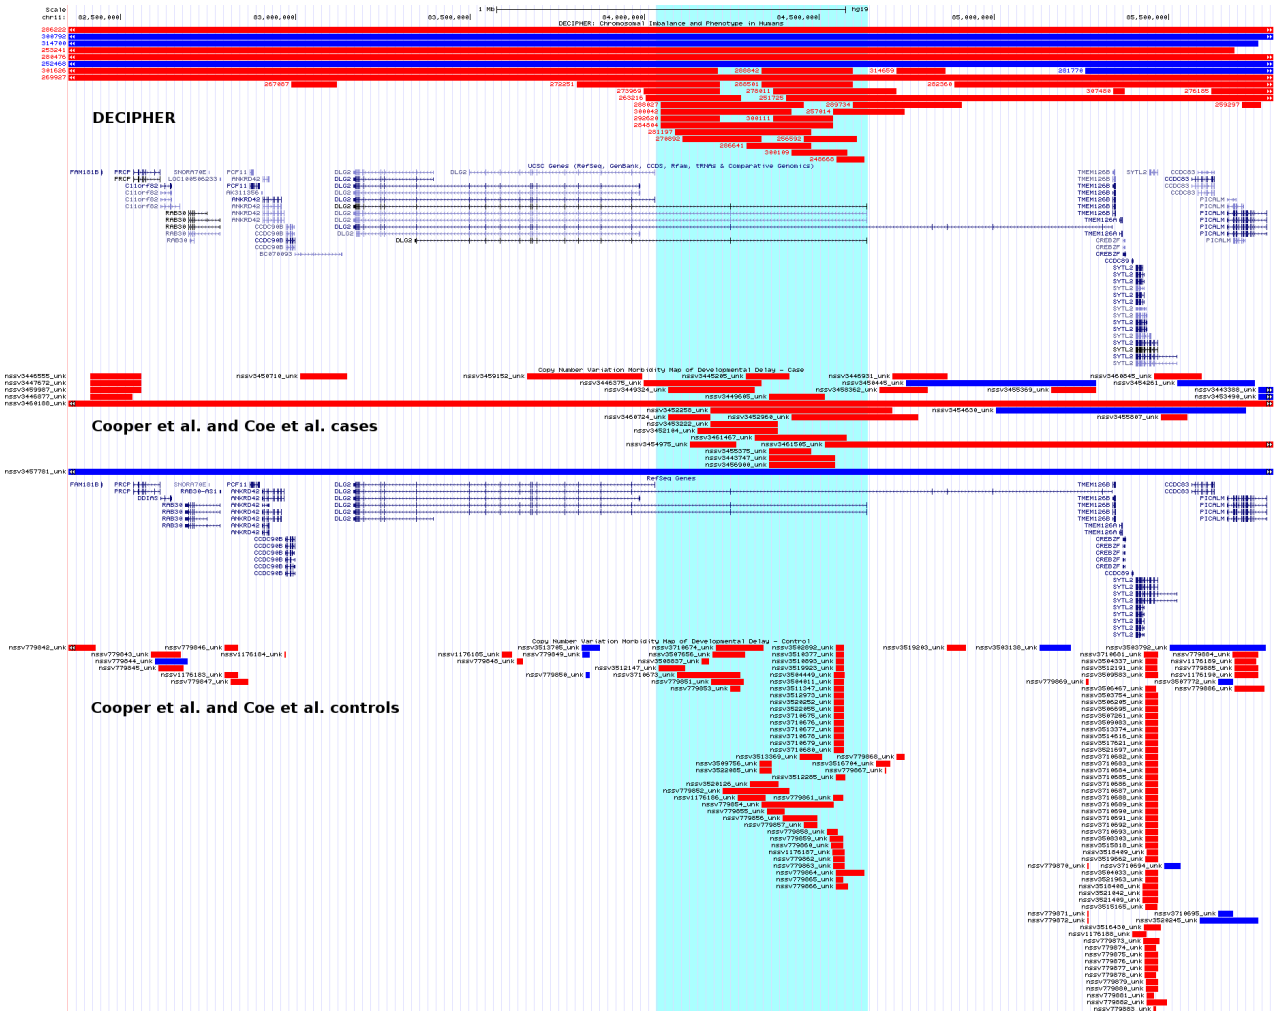

Figure S6: DECIPHER, Cooper *et al.* [1] and Coe *et al.* [2] (GDD/ID) cohorts. The light blue vertical region highlights the *DLG2* 7-9 region. With respect to Figure 1 describing the 29 patients, in this figure the DECIPHER tracks show two more patients which are not considered in analysis, 314659 and 257014, because in a later DECIPHER release. Patients 282360 and 251725 have CNVs larger than 3MB, therefore they have been filtered out in the preprocessing step.



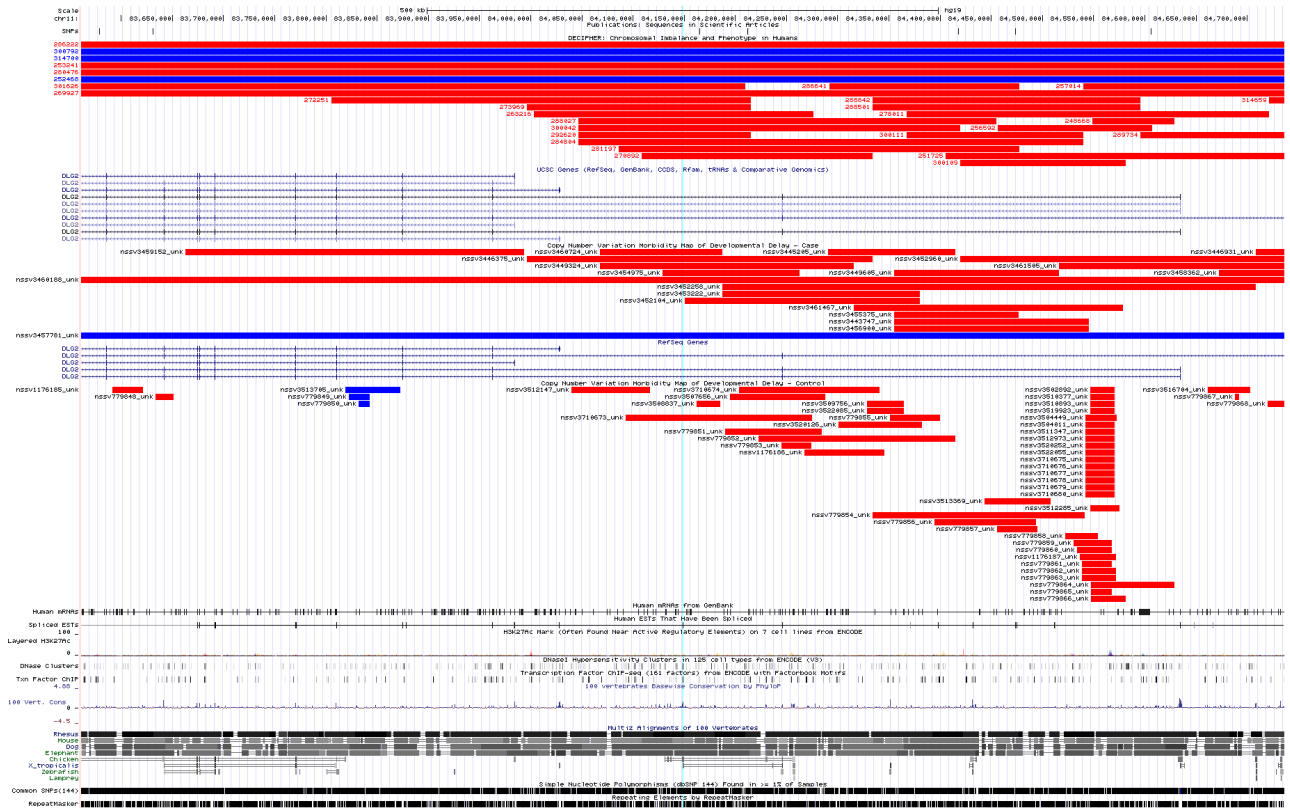

Figure S8: DECIPHER, Cooper *et al.* [1] and Coe *et al.* [2] (GDD/ID) cohorts. The light blue vertical region highlights HPin8. With respect to Figure 1 in the main article describing 29 patients, here the DECIPHER tracks show two more patients which are not considered in analysis, 314659 and 257014, because in a later DECIPHER release. Patients 282360 and 251725 have CNVs larger than 3MB, therefore they have been filtered out in the preprocessing step.

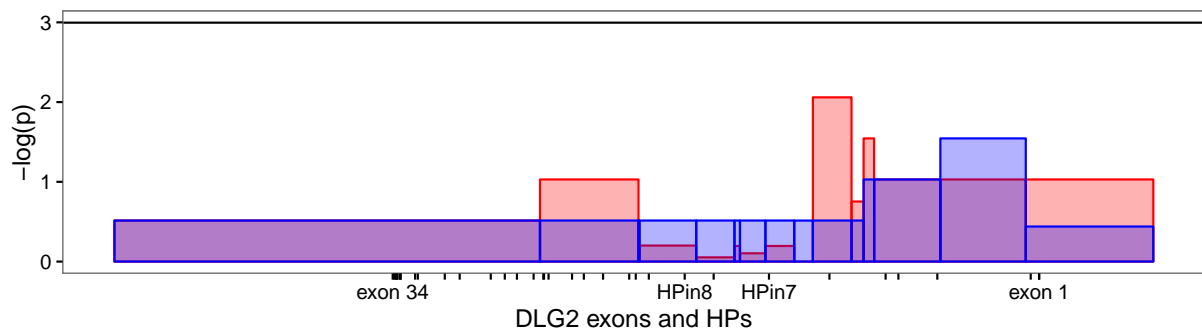

Figure S9: Partial reproduction of the windowed statistical analysis (one-tailed Fisher's exact test p-values) on *DLG2*. [2] The horizontal bar at the top set the statistical significant threshold  $-\log(0.05)$ . Blue and red colors stand for duplication and deletion analysis, respectively. The original data in hg18 has been converted in hg19 using LiftOver tool. According to Coe *et al.* [2] analysis, no statistical significant enrichment has been detected in *DLG2*, this is probably due to the choice of considering those CNVs intersecting with an exon, therefore filtering out all intronic CNVs.



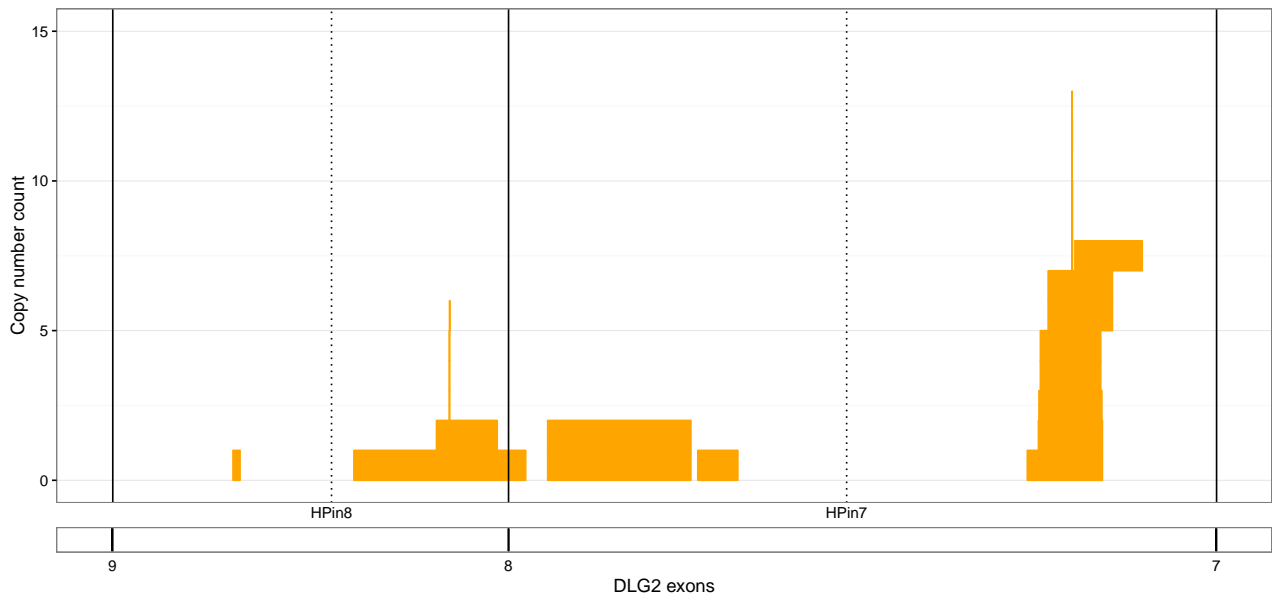

Figure S10: DGV deletions in *DLG2* 7-9 region. Data in Table S12.

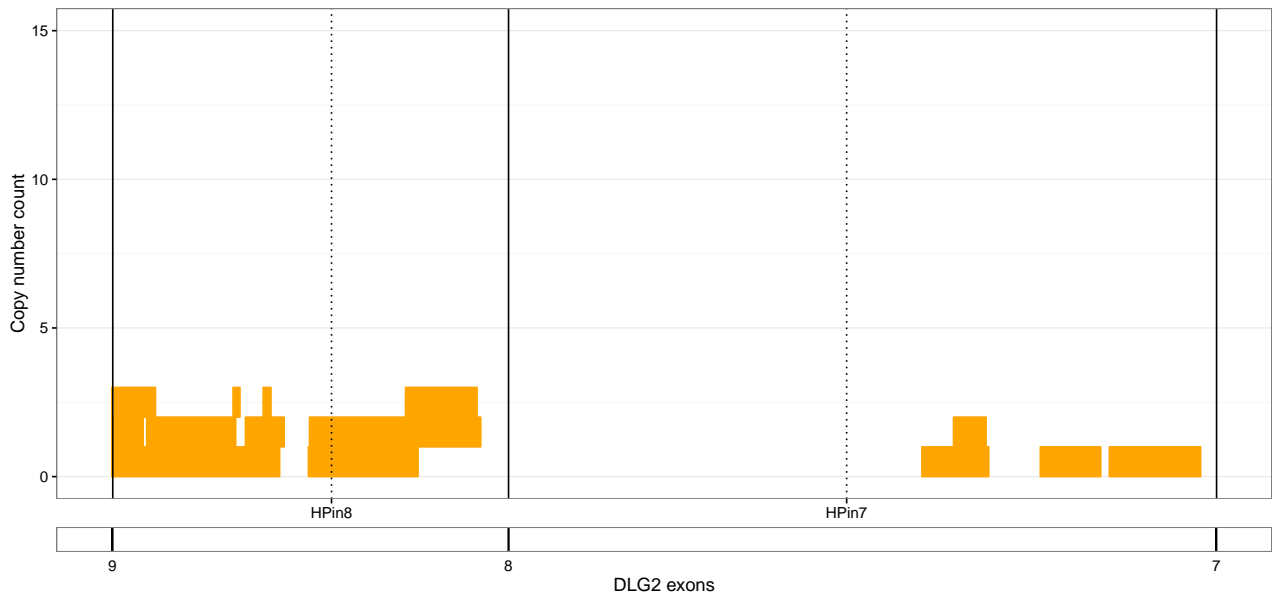

Figure S11: 1KG deletions in *DLG2* 7-9 region. Data in Table S13.



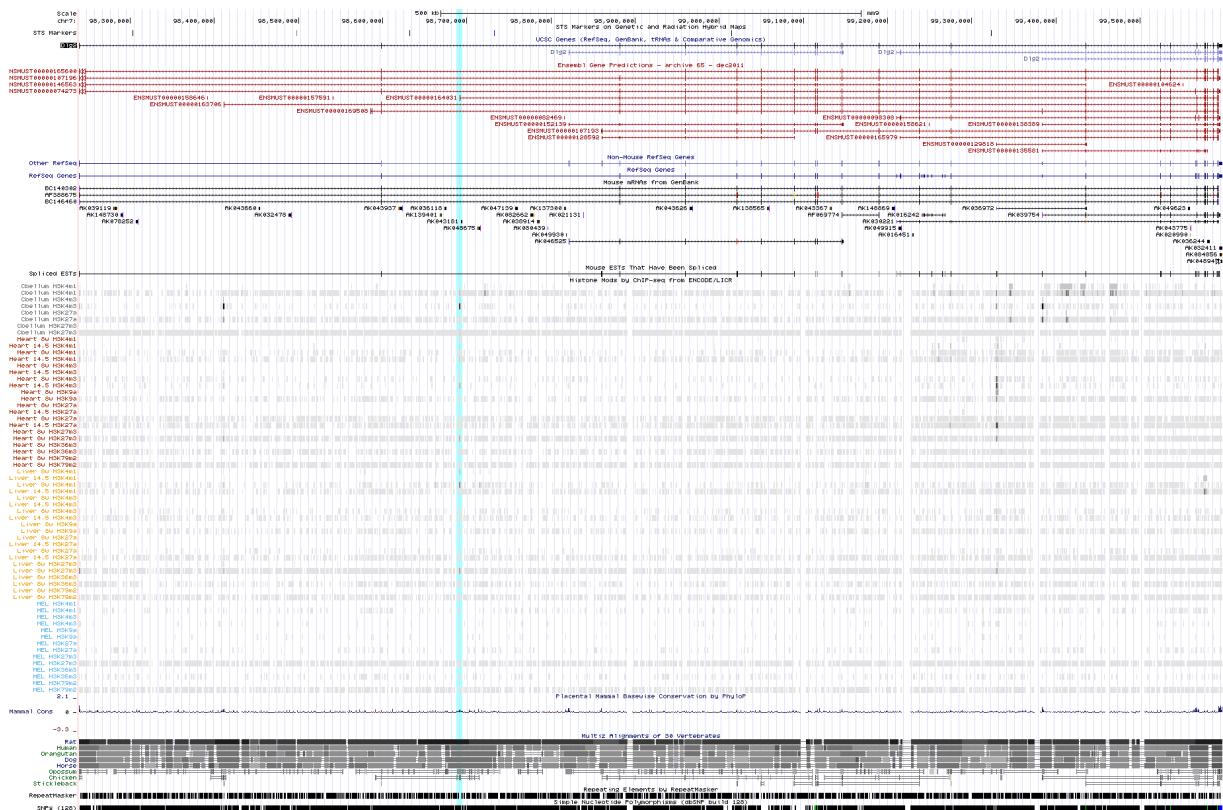

Figure S13: mHPin2 (corresponding to HPin8) in UCSC genome browser (mm9). For readability purposes, the vertical light blue region highlights a genomic range 9 times wider and centered on mHPin2. Such region overlaps ENSMUST00000164031 predicted isoform and H3K4me3 Chip-Seq peak in brain tissue.

| Position                 | Length | Score | Status   | Chromati... | DNase | TFBS | Other DB                 |
|--------------------------|--------|-------|----------|-------------|-------|------|--------------------------|
| chr11 :84147915-84149126 | 1211   | 557   | intronic | ●●●●●       | ●     | 18   | <input type="checkbox"/> |

Figure S14: CEGA conserved elements inside HPin8 (*Euarchontoglires* clade and *Homo Sapiens* species). *Score* represents the PhastCons score of the region. *DNase* grayscale value represents the DNA accessibility of the region using ENCODE data, using a percentage score black = 100% and white = 0% or data missing. The database reports one long highly conserved genomic region inside HPin8 and site for 18 transcription factors. The chromatin state column (see CEGA website for legend) suggests HPin8 as weak/inactive/poised promoter (in 9 ENCODE cell lines).

| Position                 | Length | Score | Status   | Chromati... | DNase | TFBS | Other DB                 |
|--------------------------|--------|-------|----------|-------------|-------|------|--------------------------|
| chr11 :84430606-84430809 | 203    | 54    | intronic | ●●●●●       | ○     | 1    | <input type="checkbox"/> |
| chr11 :84431909-84432233 | 324    | 97    | intronic | ●●●●●       | ●     | 2    | <input type="checkbox"/> |
| chr11 :84432330-84432392 | 62     | 20    | intronic | ●●●●●       | ●     | 1    | <input type="checkbox"/> |

Figure S15: CEGA conserved elements inside HPin7 (*Euarchontoglires* clade and *Homo Sapiens* species). *Score* represents the PhastCons score of the region. *DNase* grayscale value represents the DNA accessibility of the region using ENCODE data, using a percentage score black = 100% and white = 0% or data missing. The database reports three genomic regions inside HPin7 overlapping a total of 4 transcription factors. The chromatin state column (see CEGA website for legend) suggests HPin7 as weak/inactive/poised promoter (in 9 ENCODE cell lines).

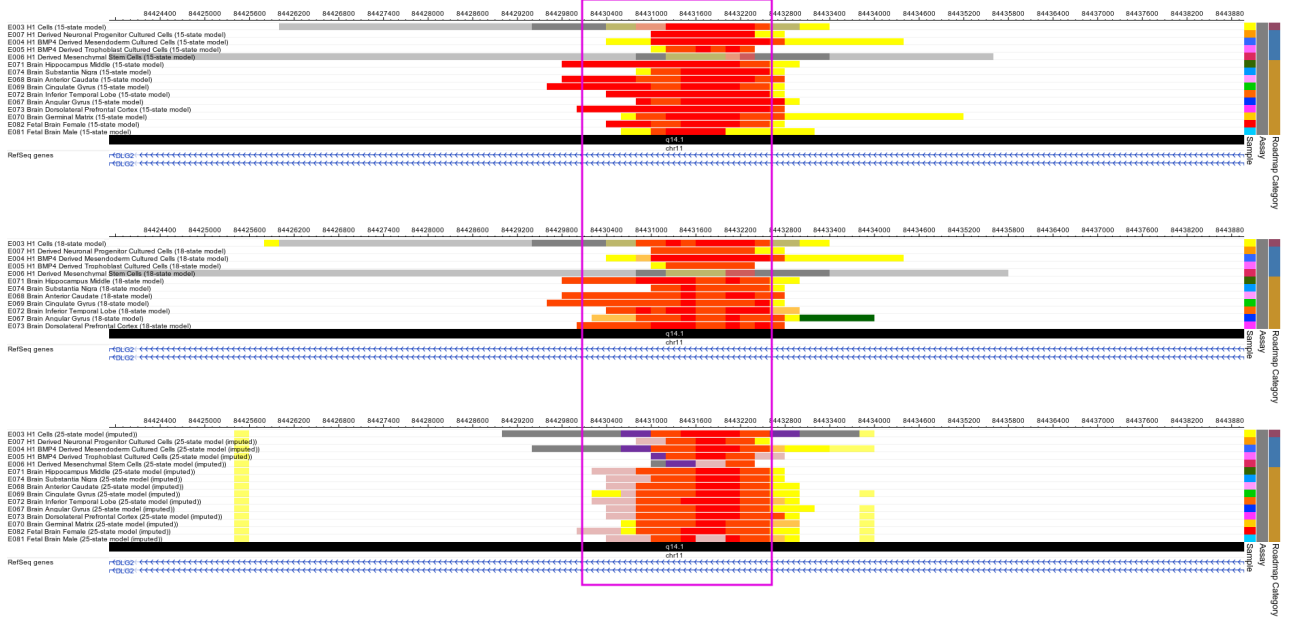

Figure S16: Roadmap Epigenomics 15-state, 18-state and 25-state models in HPin7 (purple box). Figure S18 reports the color legend

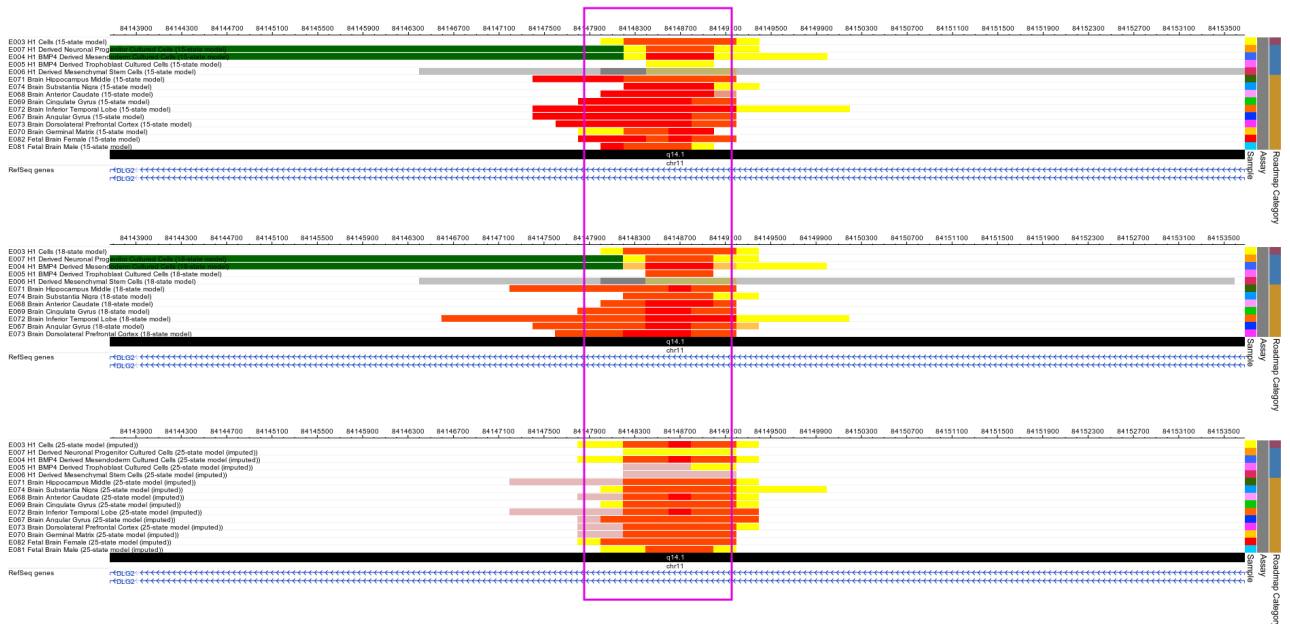

Figure S17: Roadmap Epigenomics 15-state, 18-state and 25-state models in HPin8 (purple box). Figure S18 reports the color legend

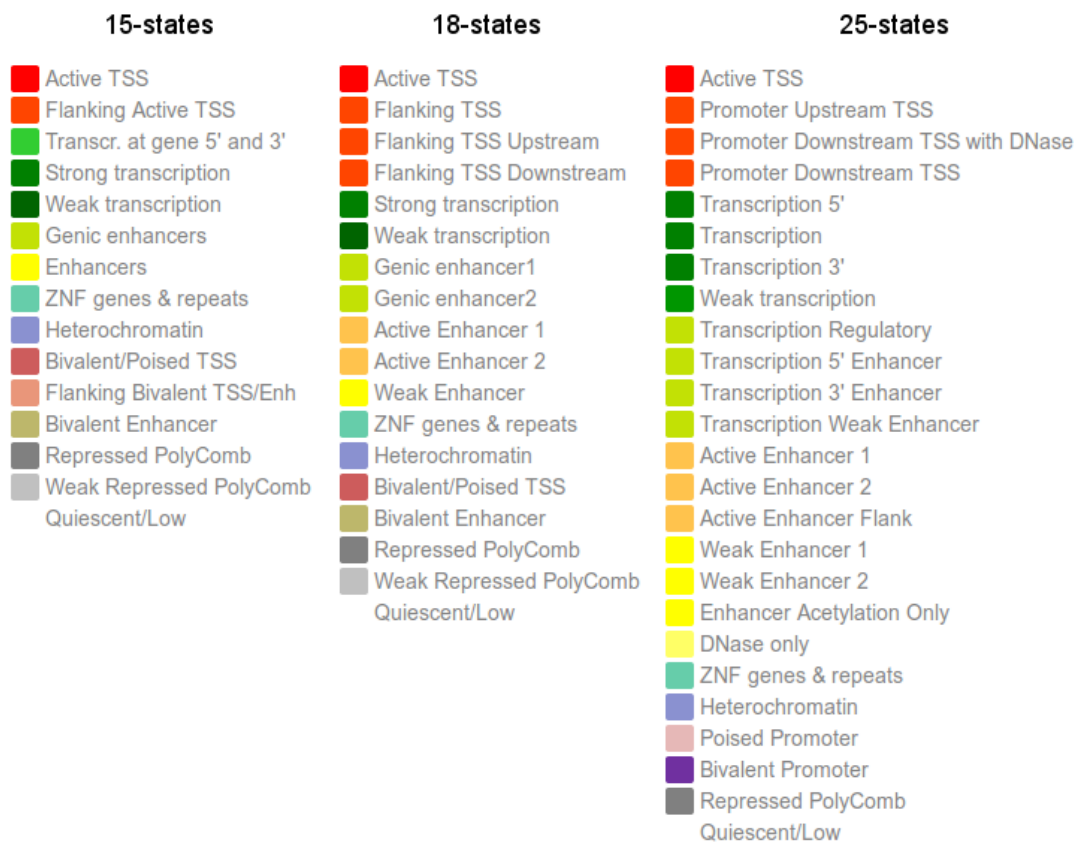

Figure S18: Roadmap Epigenomics color legend.

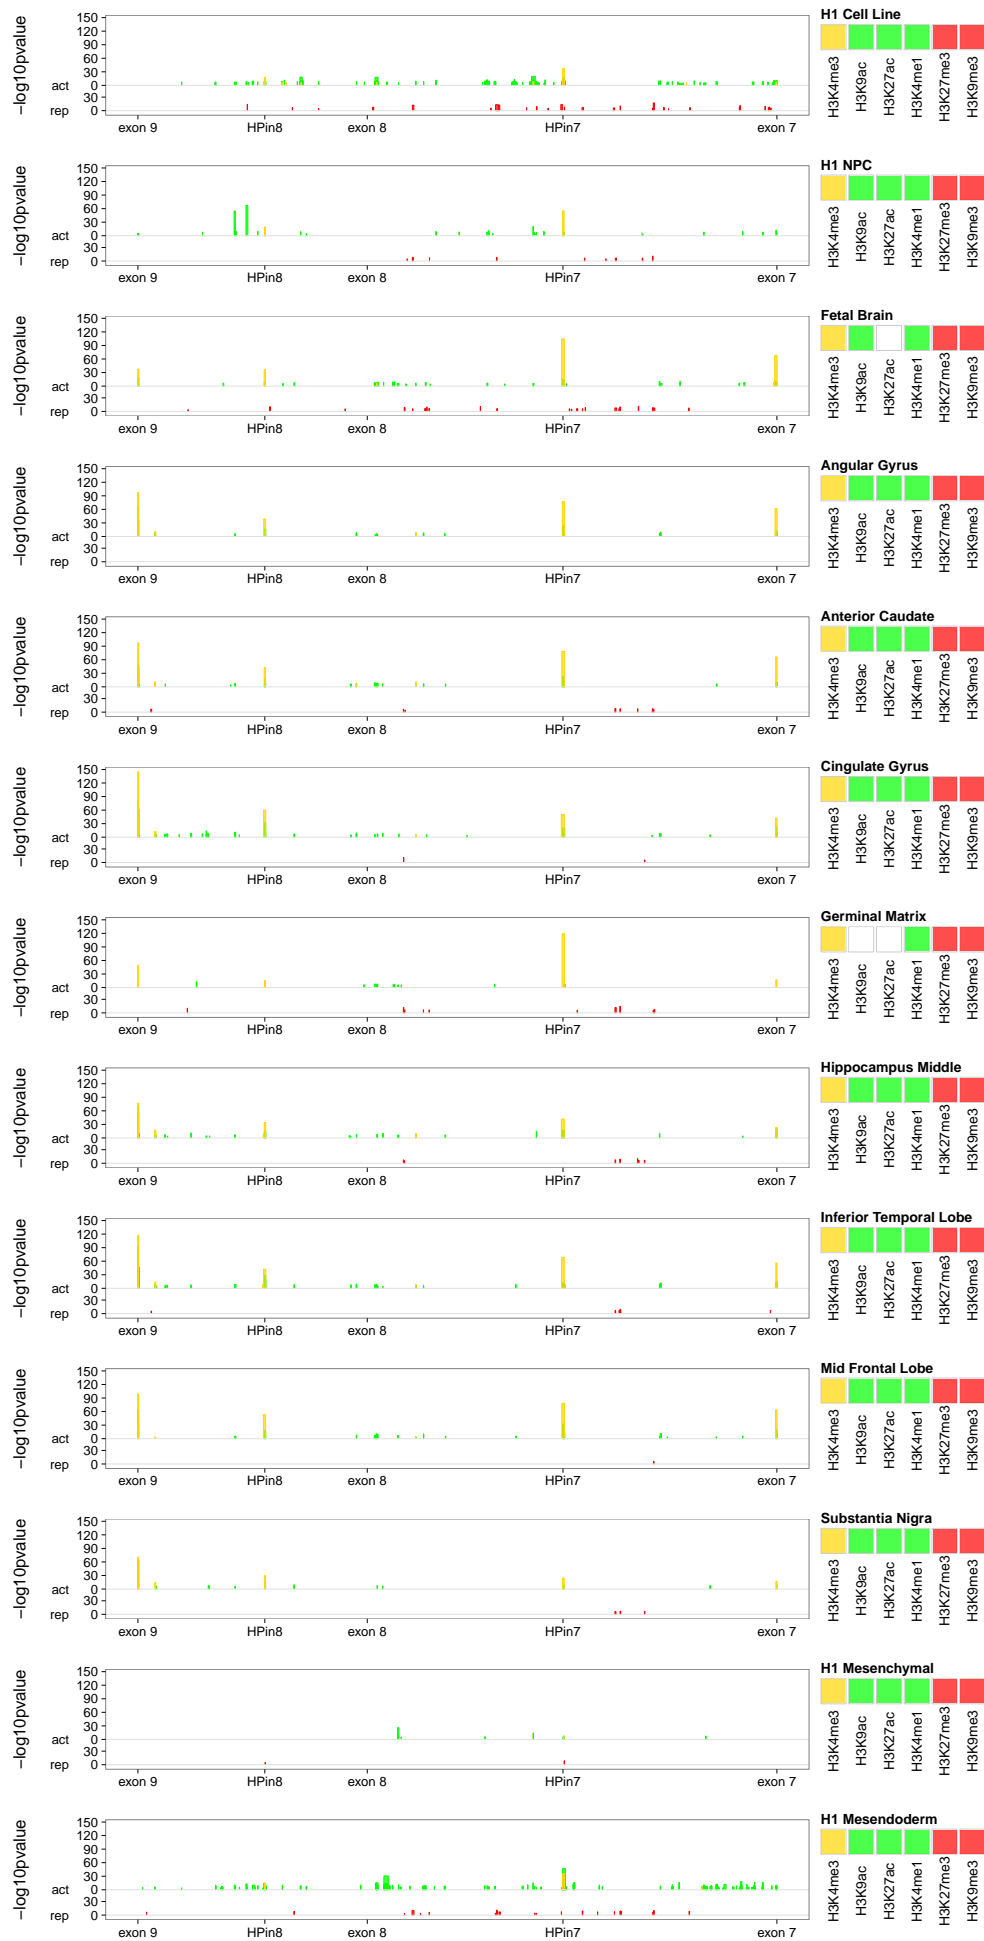

Figure S19: Roadmap epigenomic peaks across *DLG2* 7-9 region.

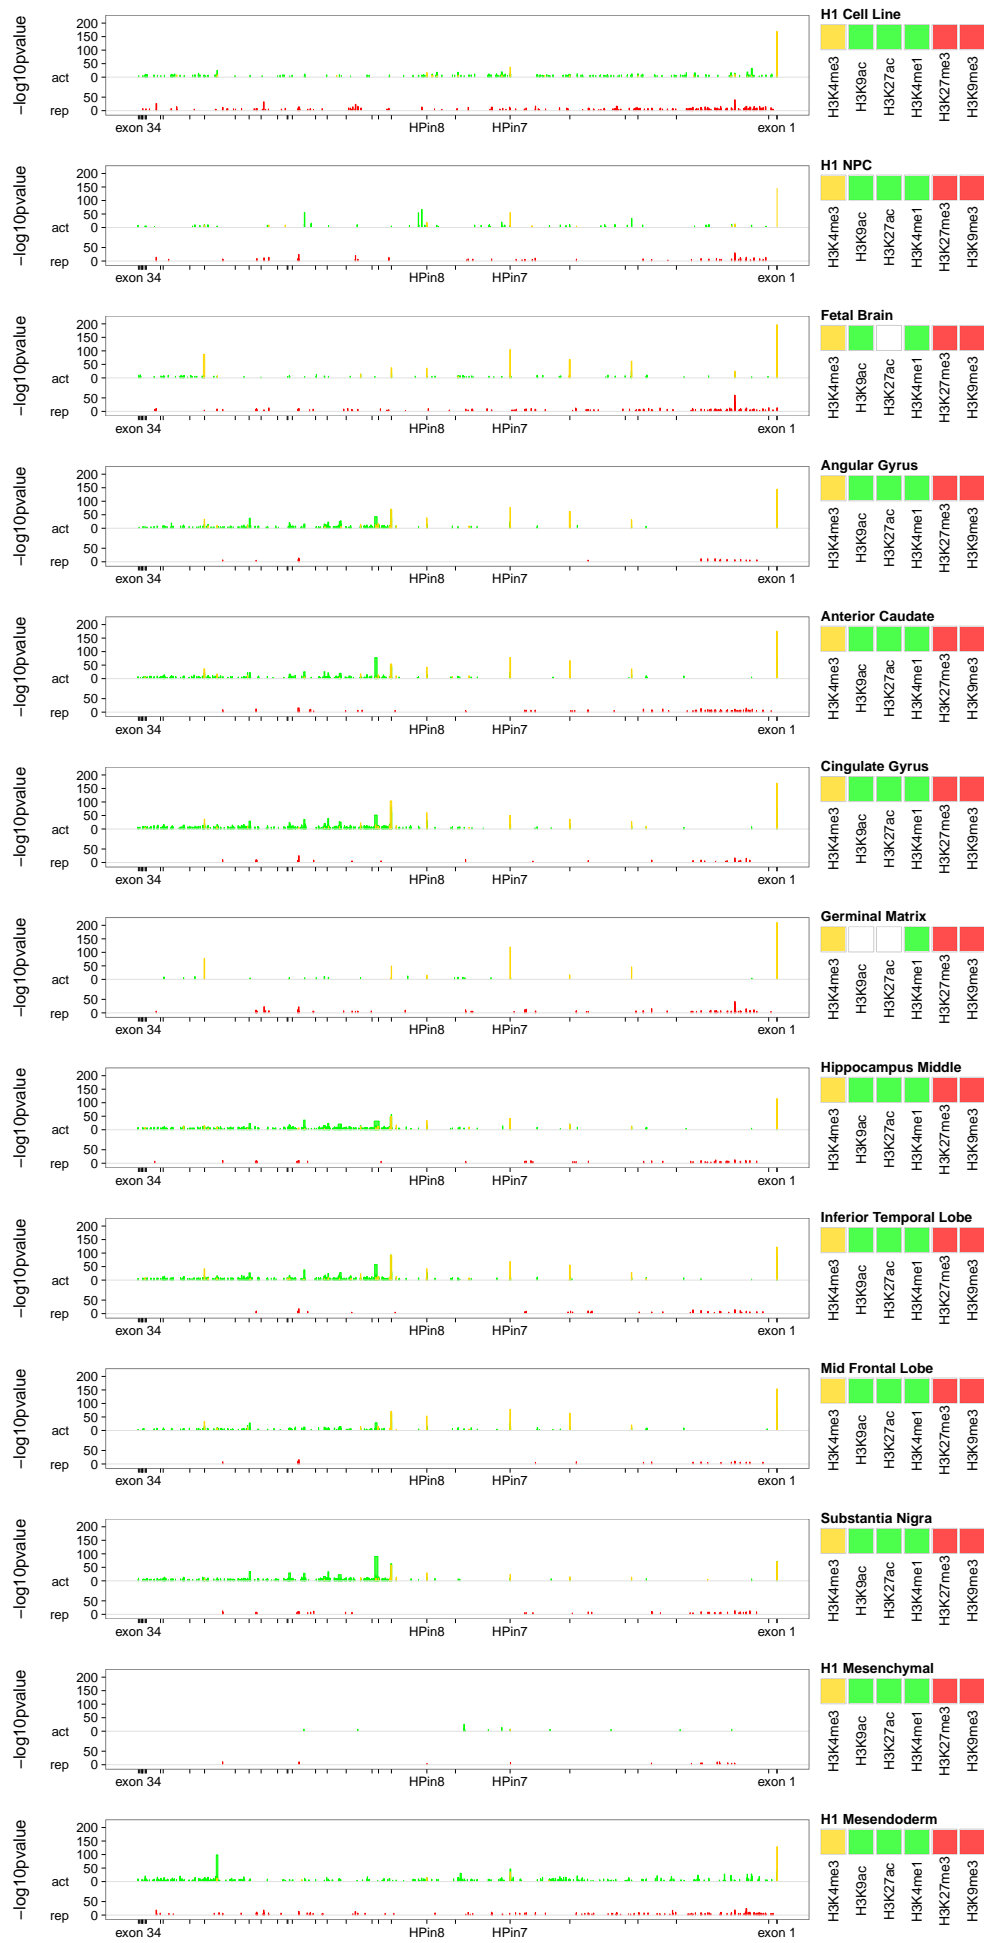

Figure S20: Roadmap epigenomic peaks across *DLG2* gene.







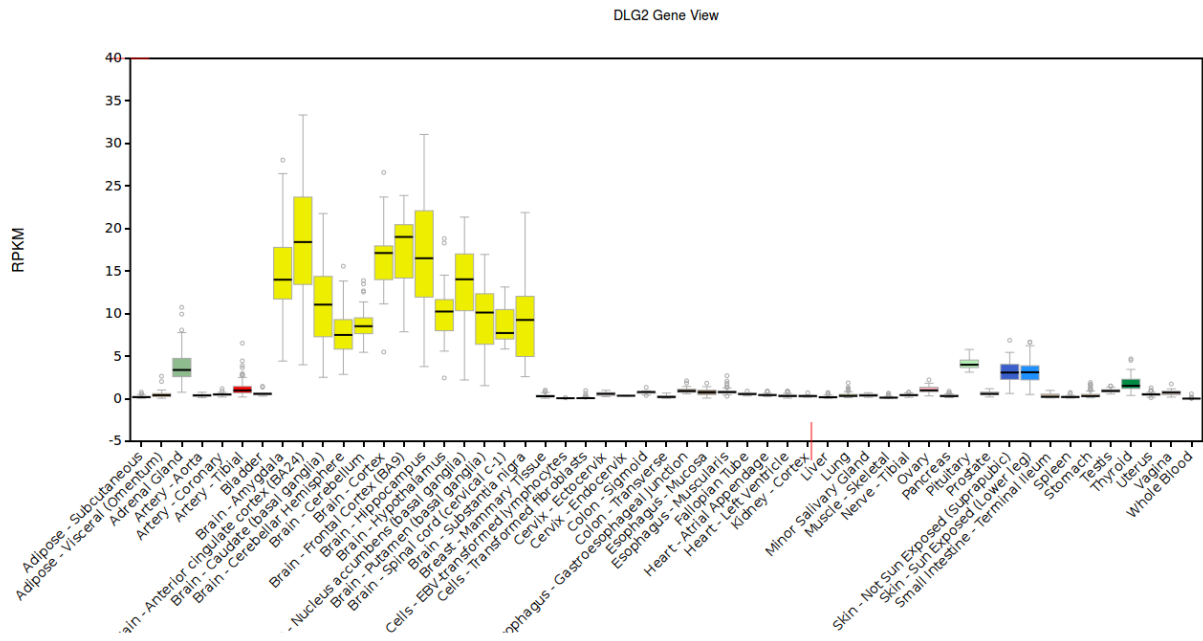

Figure S23: *DLG2* gene expression across tissues (linear scale), from GTEx Project (date 23 Sept 2015). Please note that GTEx studies only known isoforms expression, hence, HPs isoforms were not evaluated by the GTEx project.



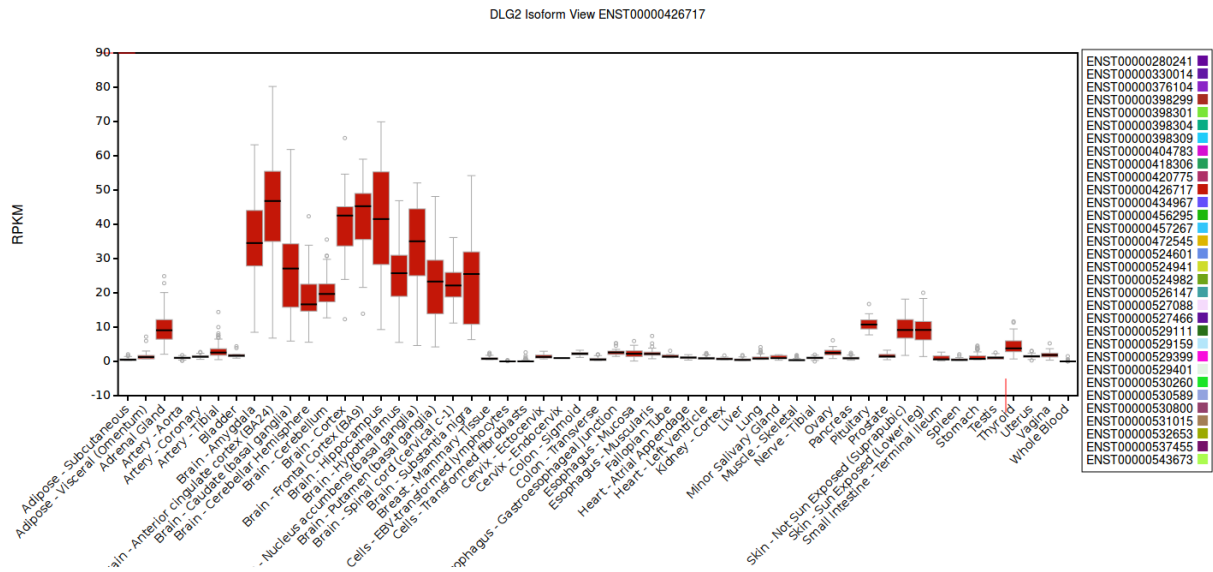

Figure S26: ENST00000426717 expression across tissues (linear scale), from GTEx Project (date 23 Sept 2015). It starts at exon 32, Ensembl numbering (or exon 22 in UCSC numbering; see Figure S29 and Table S3). Please note that GTEx studies only known isoforms expression, hence, HPs isoforms were not evaluated by the GTEx project.

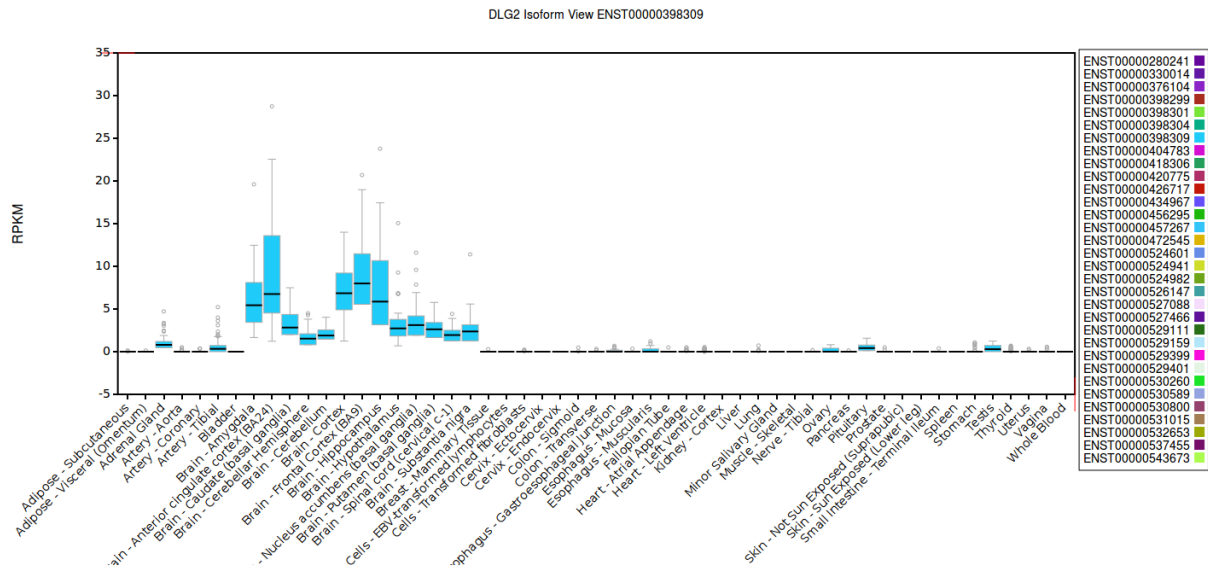

Figure S27: ENST00000398309 expression across tissues (linear scale), from GTEx Project (date 23 Sept 2015). It starts at exon 11, Ensembl numbering (or exon 7 in UCSC numbering; see Figure S29 and Table S3). Please note that GTEx studies only known isoforms expression, hence, HPs isoforms were not evaluated by the GTEx project.



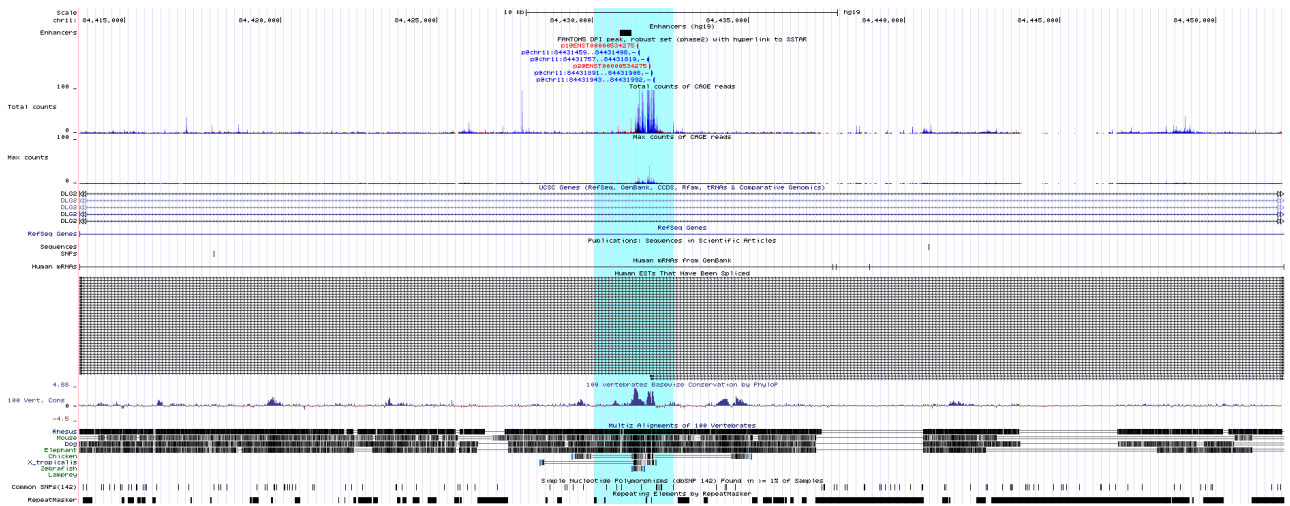

Figure S30: HPin7 region integrated with human EST, FANTOM5 and epigenomics data. The start of Ensembl human (sense) ESTs AA180967 and AA180882 are included in the HPin7 region (light-blue). Multiple detected peaks and human ESTs in HPs (highlighted with the light-blue region) suggest the beginning of a transcription.

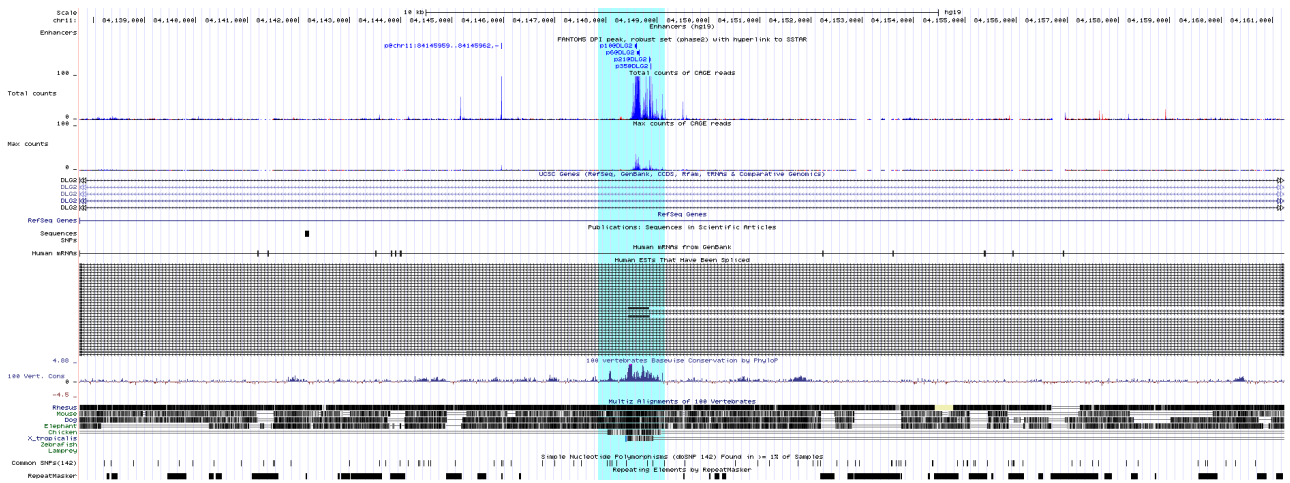

Figure S31: HPin8 region integrated with human EST and FANTOM5 data. The start of Ensembl human (antisense) ESTs DA163026 and DA357282 are included in the HPin8 region (light-blue). Multiple detected peaks and human ESTs in HPs (highlighted with the light-blue region) suggest the beginning of a transcription.

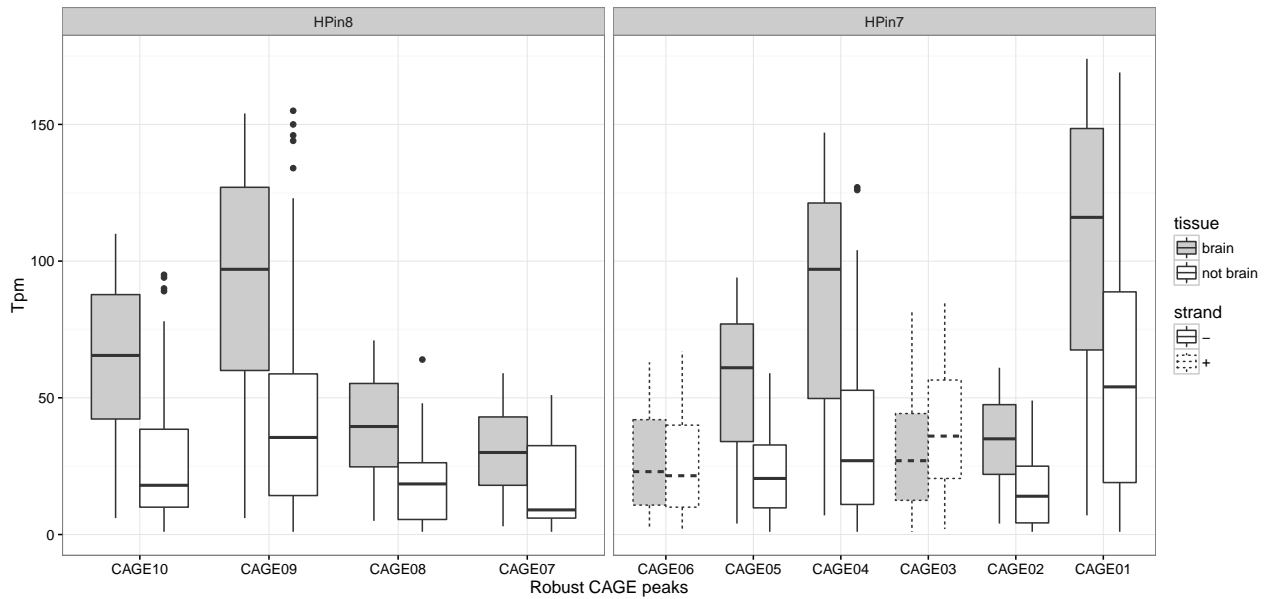

Figure S32: Brain vs other tissue-expression values for every CAGE robust peak found inside HPs. See Table S22 for coordinates.

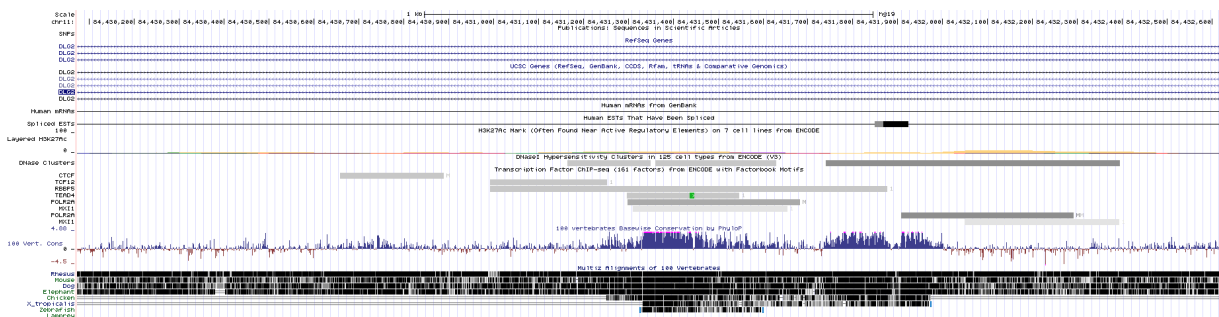

Figure S33: Transcription factors in HPin7 from ENCODE (UCSC Genome browser image).

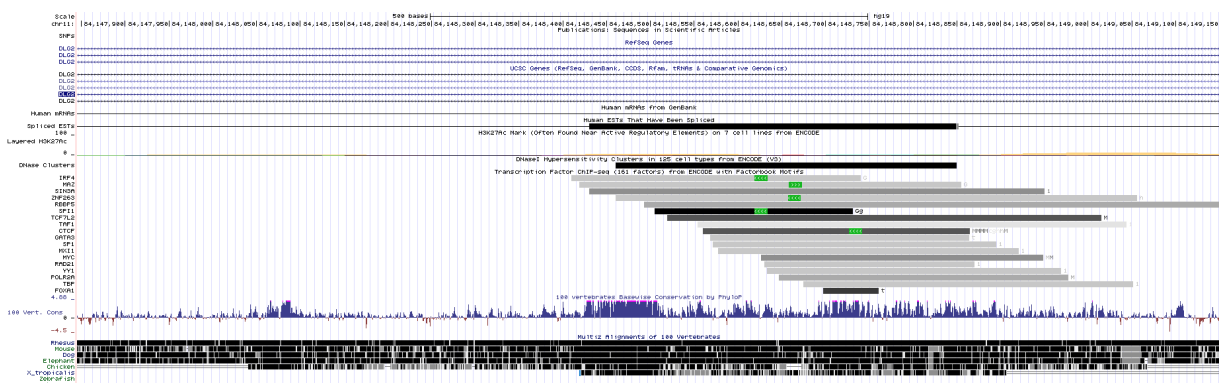

Figure S34: Transcription factors in HPin8 from ENCODE (UCSC Genome browser image).

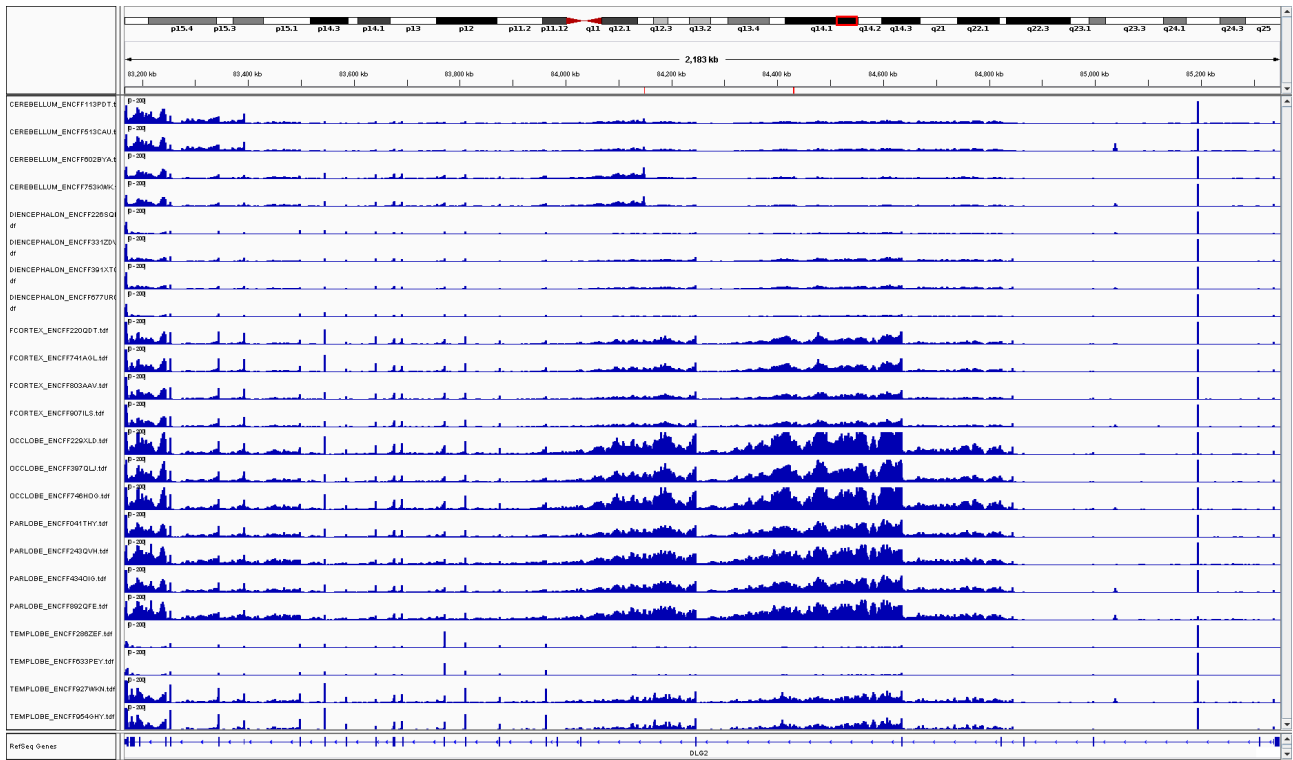

Figure S35: IGV visualization of ENCODE Fetal Brain BAM files coverage in *DLG2* gene. On the left column, *.tdf* files have been named with the tissue name and ENCODE id of the BAM. The top panel shows the region of interest in the chromosome, genomic coordinates and two red vertical lines corresponding to HPin8 and HPin7 (from left to right), respectively. The bottom panel shows the RefSeq *DLG2* gene with exons. In the main panel, the y-scales of all tracks have been manually set and fix to the 0-200 range. This figure shows that HPin7 and HPin8 belong to transcribed regions, and a better overview of those regions is provided in Figures S39 and S40.

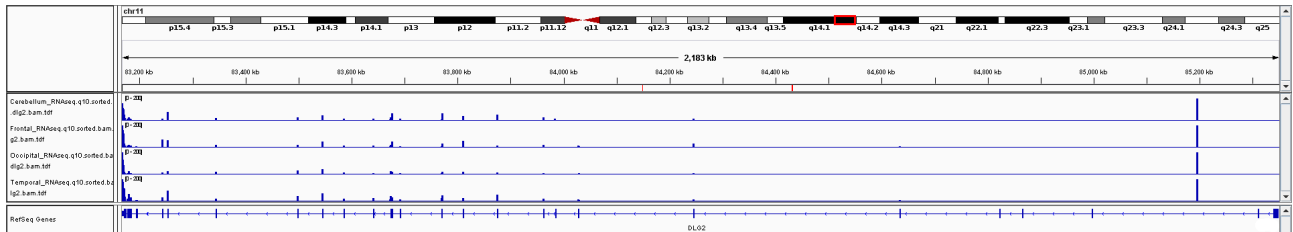

Figure S36: IGV visualization of Adult Brain BAM files coverage in *DLG2* gene from [3]. On the left column, *.tdf* files have been named with the tissue name. The top panel shows the region of interest in the chromosome, genomic coordinates and two red vertical lines corresponding to HPin8 and HPin7 (from left to right), respectively. The bottom panel shows the RefSeq *DLG2* gene with exons. In the main panel, the y-scales of all tracks have been manually set and fix to the 0-200 range.



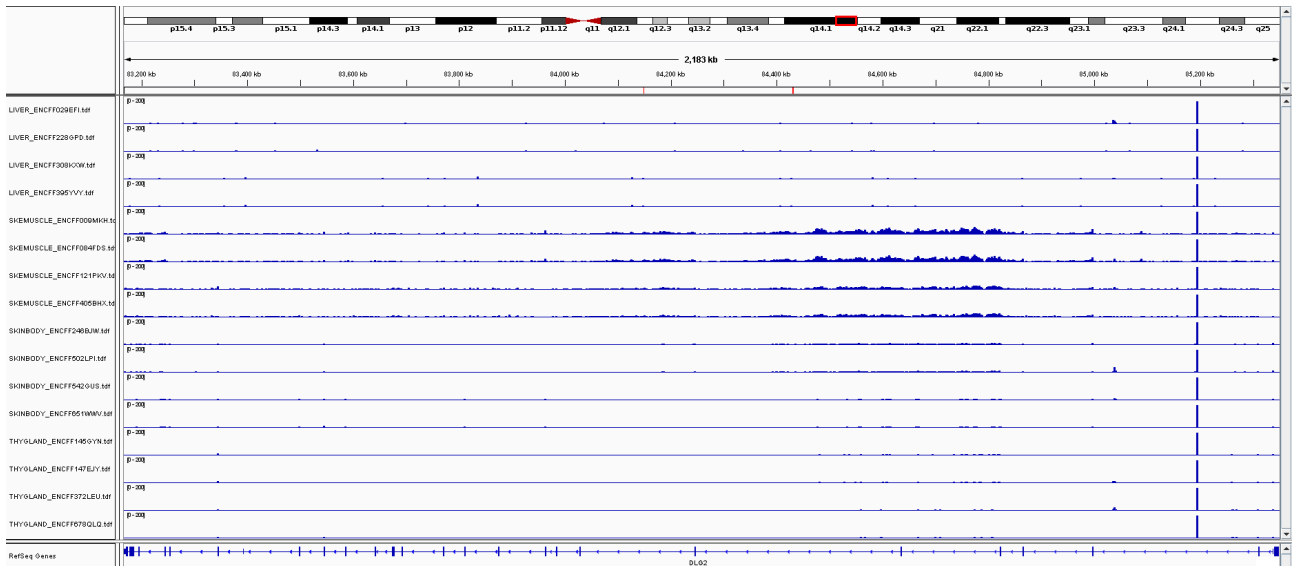

Figure S37: IGV visualization of ENCODE Fetal non-Brain BAM files coverage in *DLG2* gene. On the left column, *.tdf* files have been named with the tissue name and ENCODE id of the BAM. The top panel shows the region of interest in the chromosome, genomic coordinates and two red vertical lines corresponding to HPin8 and HPin7 (from left to right), respectively. The bottom panel shows the RefSeq *DLG2* gene with exons. In the main panel, the y-scales of all tracks have been manually set and fix to the 0-200 range.

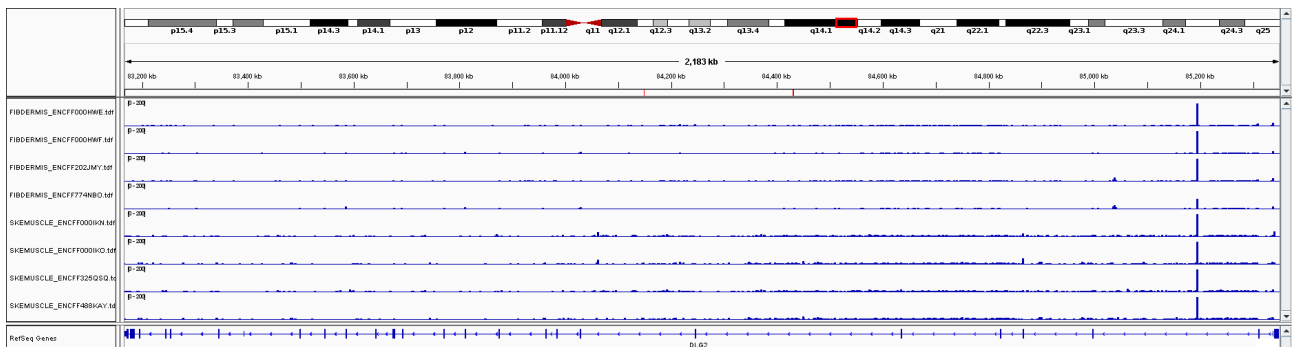

Figure S38: IGV visualization of ENCODE Adult non-Brain BAM files coverage in *DLG2* gene. On the left column, *.tdf* files have been named with the tissue name and ENCODE id of the BAM. The top panel shows the region of interest in the chromosome, genomic coordinates and two red vertical lines corresponding to HPin8 and HPin7 (from left to right), respectively. The bottom panel shows the RefSeq *DLG2* gene with exons. In the main panel, the y-scales of all tracks have been manually set and fix to the 0-200 range.

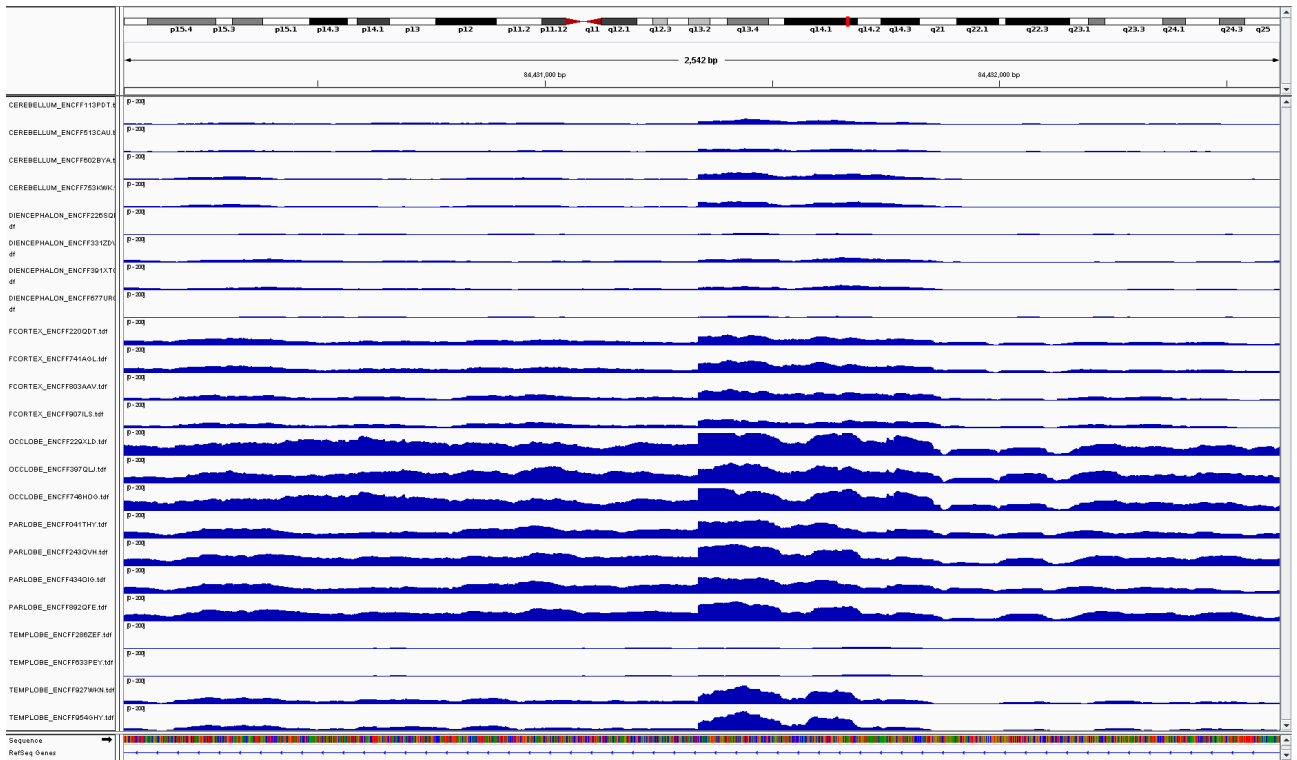

Figure S39: IGV visualization of ENCODE Fetal Brain BAM files coverage in HPin7.

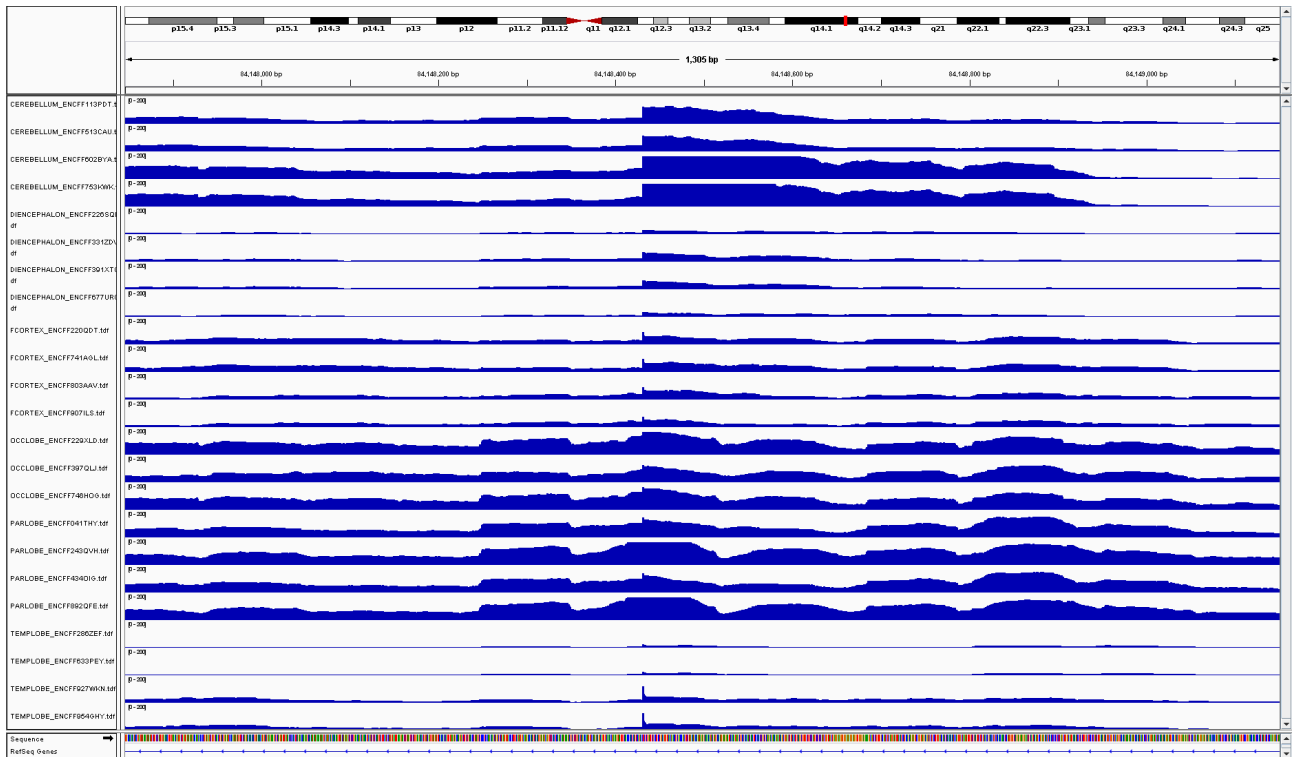

Figure S40: IGV visualization of ENCODE Fetal Brain BAM files coverage in HPin8.

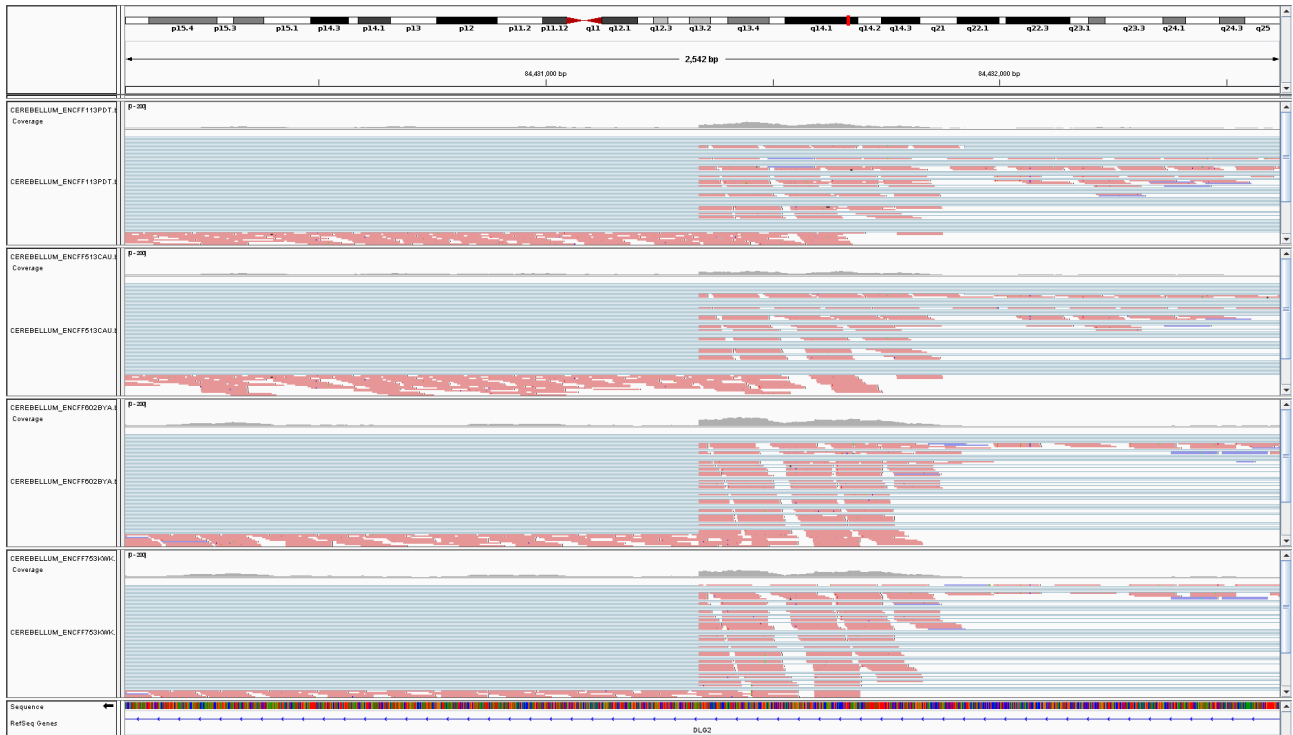

Figure S41: IGV visualization of ENCODE Fetal Brain paired-end reads and coverage in HPin7 (Cerebellum tissue). There is a sharp cut of coverage in the middle of the PRE, with many paired-end reads splitting precisely at chr11:84431338-84431339. See also Figure S43.

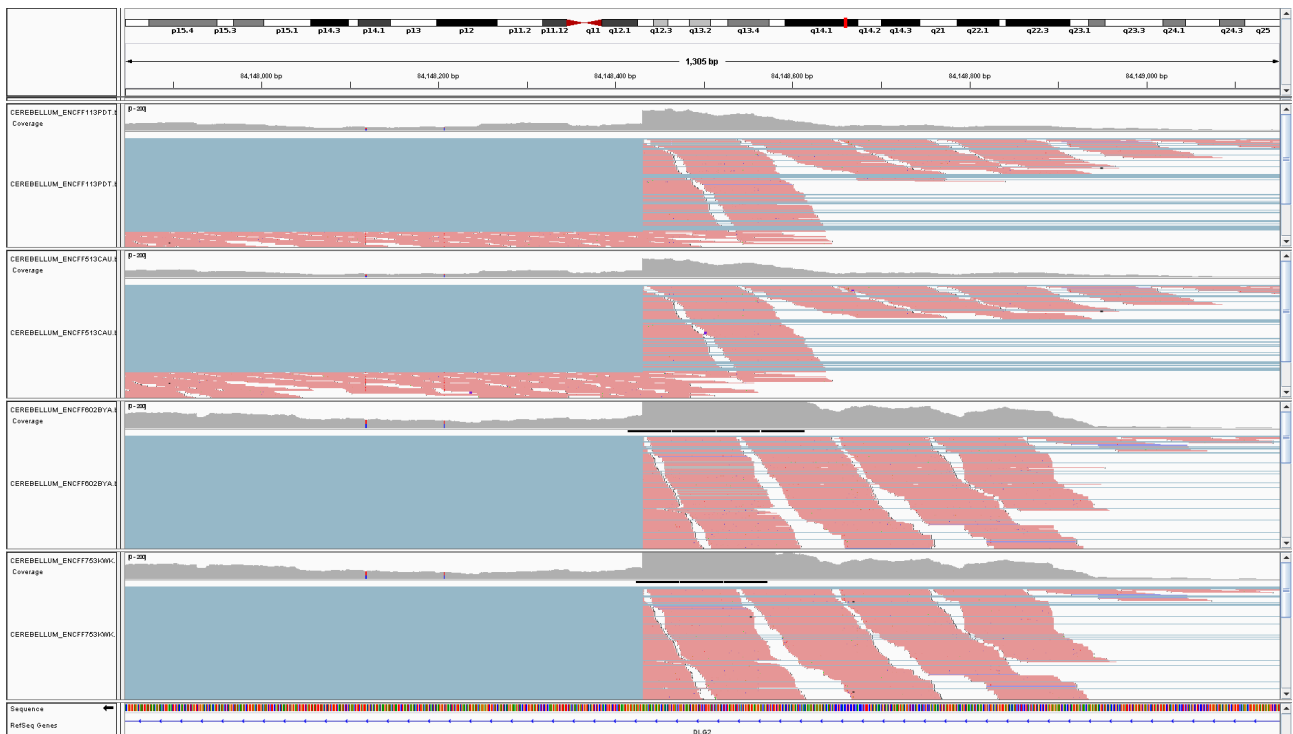

Figure S42: IGV visualization of ENCODE Fetal Brain paired-end reads and coverage in HPin8 (Cerebellum tissue). There is a sharp cut of coverage in the middle of the PRE, with many paired-end reads splitting precisely at chr11:84148430-84148431. See also Figure S44.

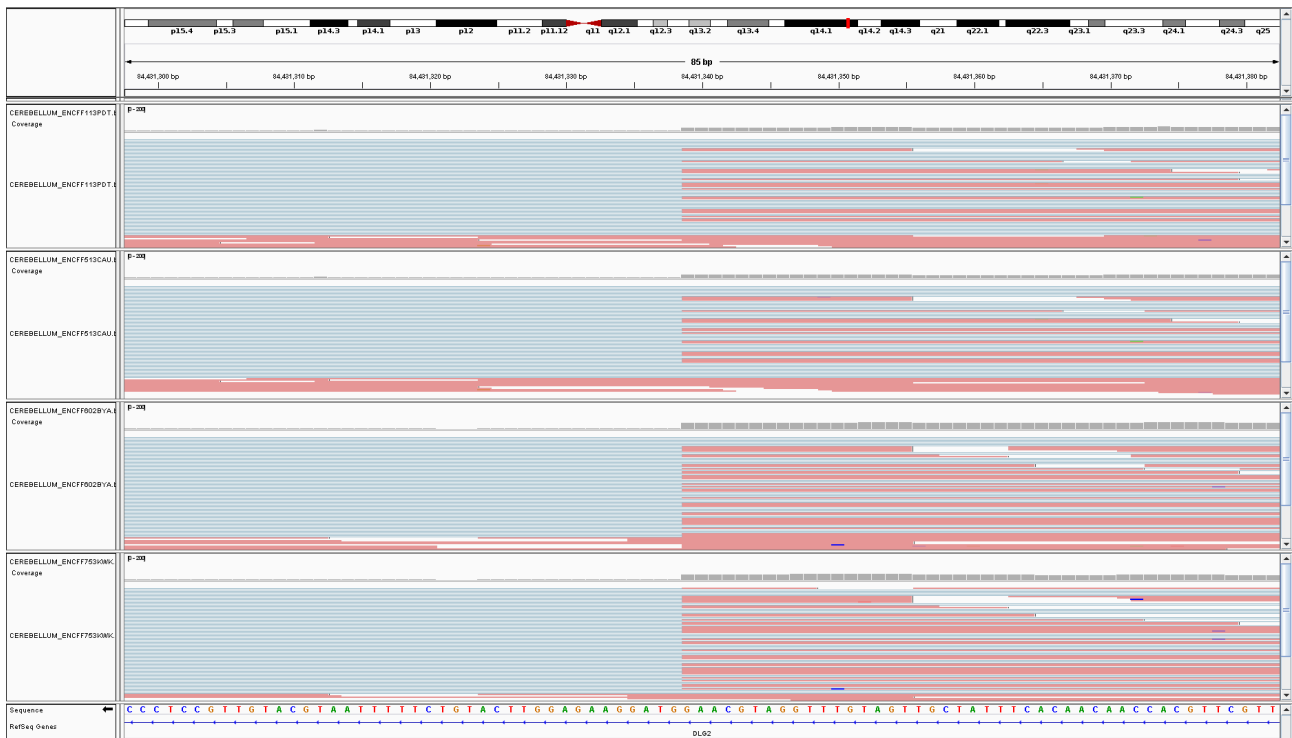

Figure S43: IGV close-up visualization of ENCODE Fetal Brain paired-end reads at the HPin7 splicing site (Cerebellum tissue). In the antisense orientation (corresponding to the *DLG2* gene transcription), the 2bp before and after the splicing site are *AG* and *GT* respectively, agreeing with the splicing consensus sequences studied in [4, 5]. The HPin7 reads splice into *DLG2* exon 8 (see Figure S54).

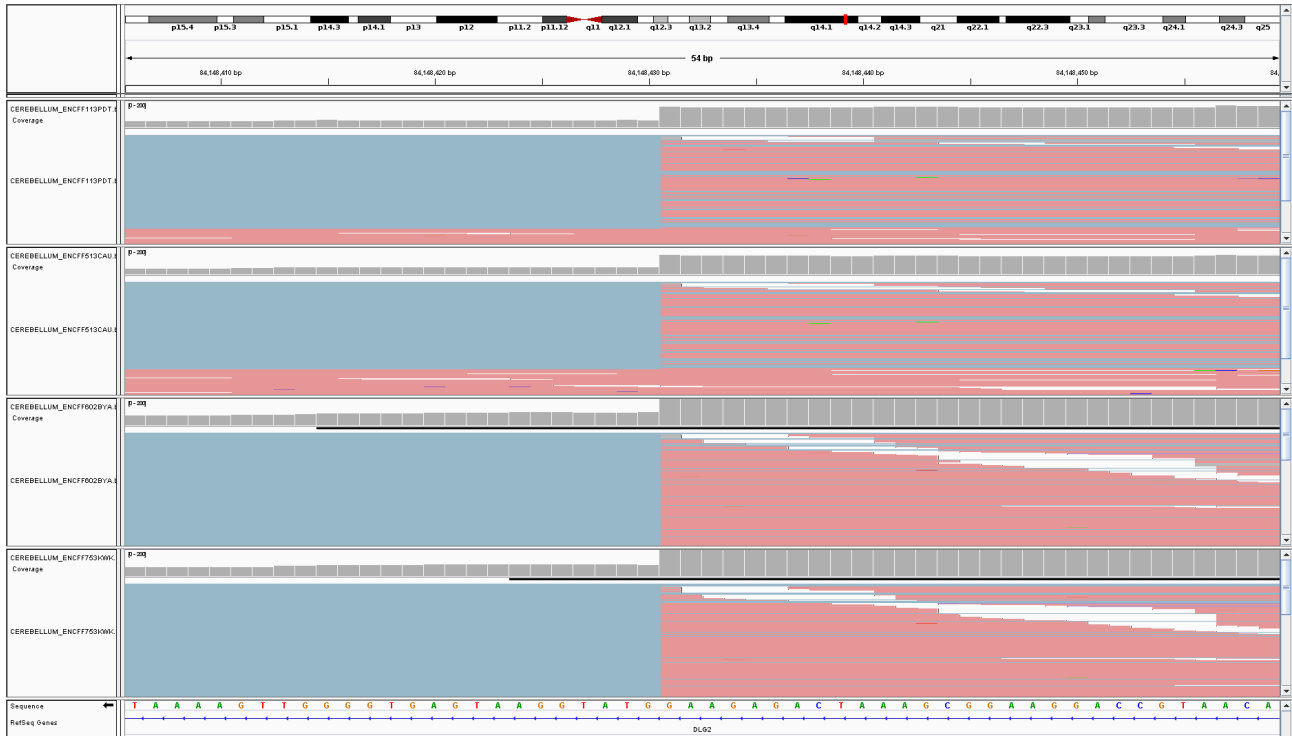

Figure S44: IGV close-up visualization of ENCODE Fetal Brain paired-end reads at the HPin8 splicing site (Cerebellum tissue). In the antisense orientation (corresponding to the *DLG2* gene transcription), the 2bp before and after the splicing site are *AG* and *GT*, respectively, agreeing with the splicing consensus sequences studied in [4, 5]. The HPin8 reads splice into *DLG2* exon 11 (see Figure S54).

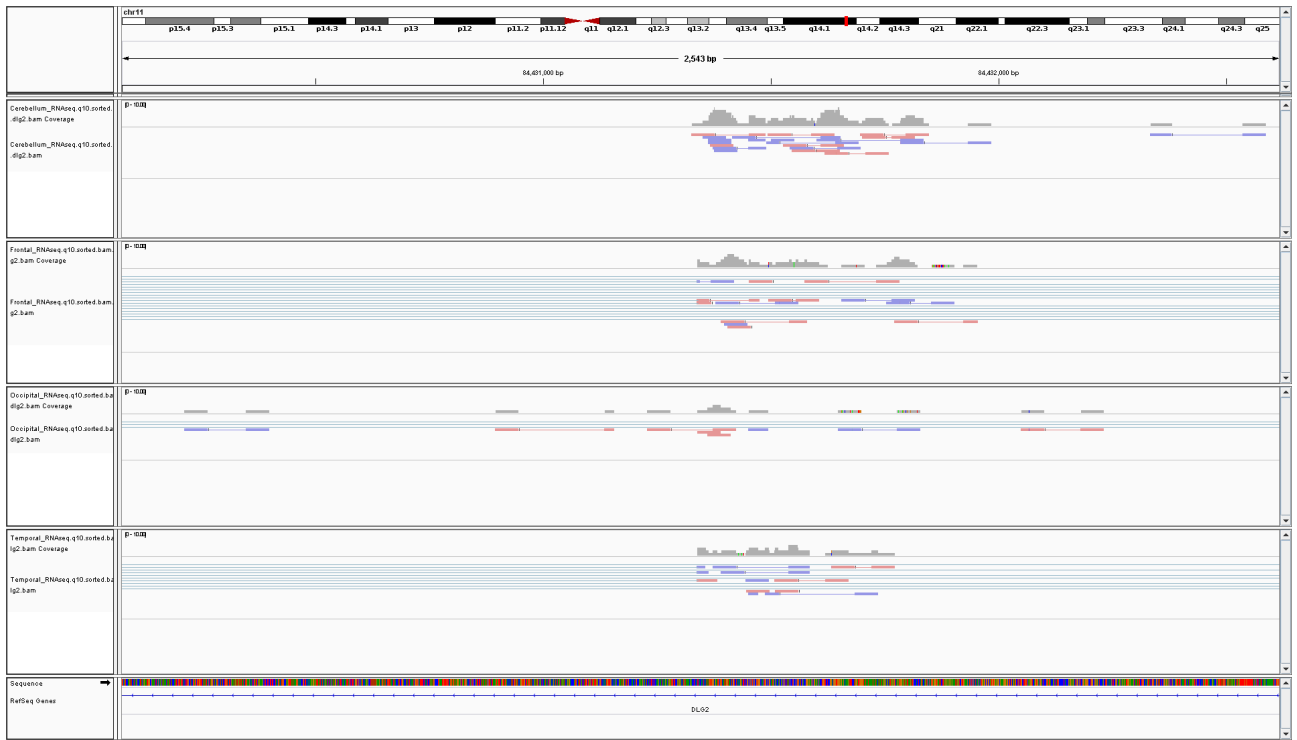

Figure S45: IGV visualization of Adult Brain BAM reads in HPin7. The y-scales of all tracks have been manually set and fixed to the 0-10 range.

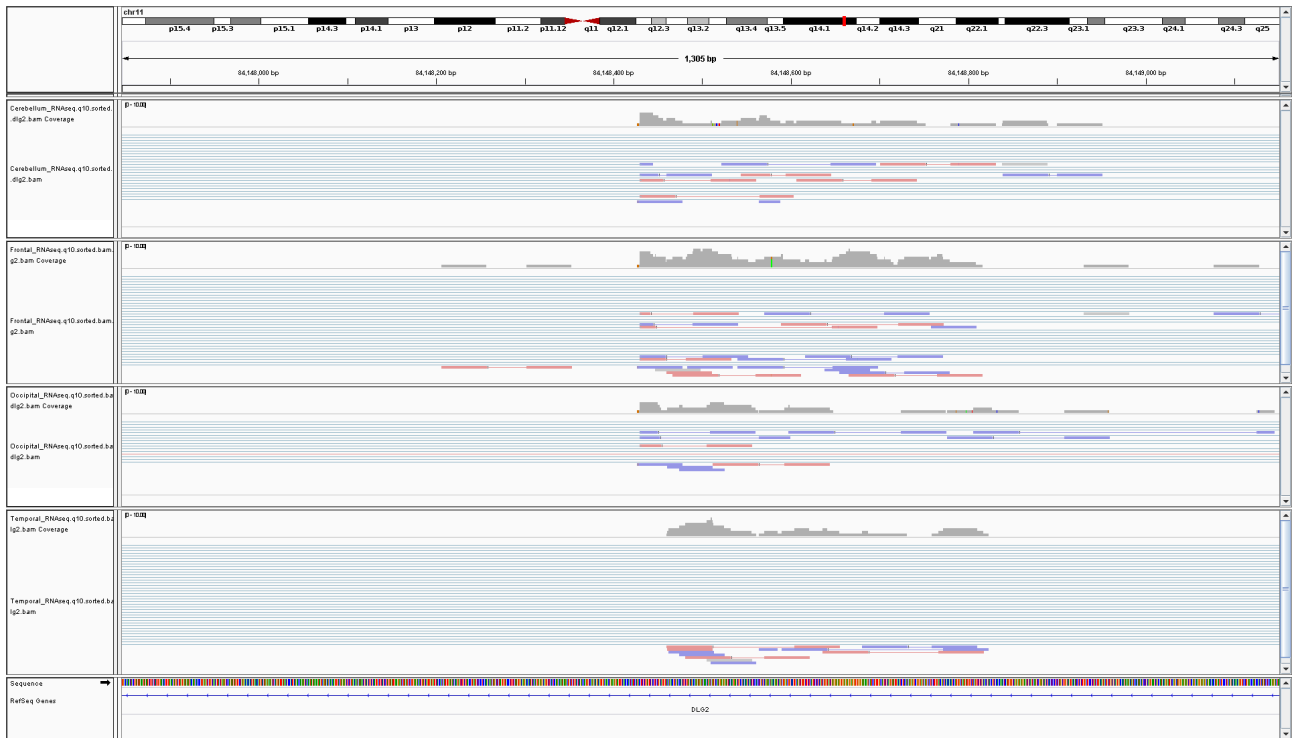

Figure S46: IGV visualization of Adult Brain BAM reads in HPin8. The y-scales of all tracks have been manually set and fixed to the 0-10 range.

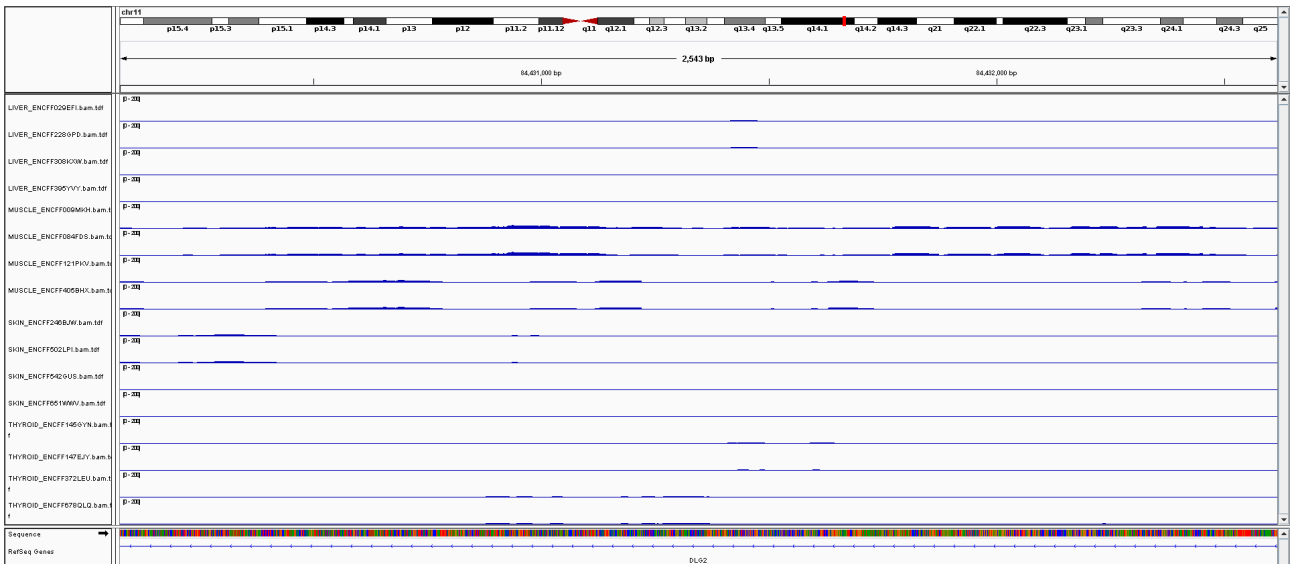

Figure S47: IGV visualization of ENCODE Fetal non-Brain BAM coverage in HPin7. The y-scales of all tracks have been manually set and fix to the 0-200 range.

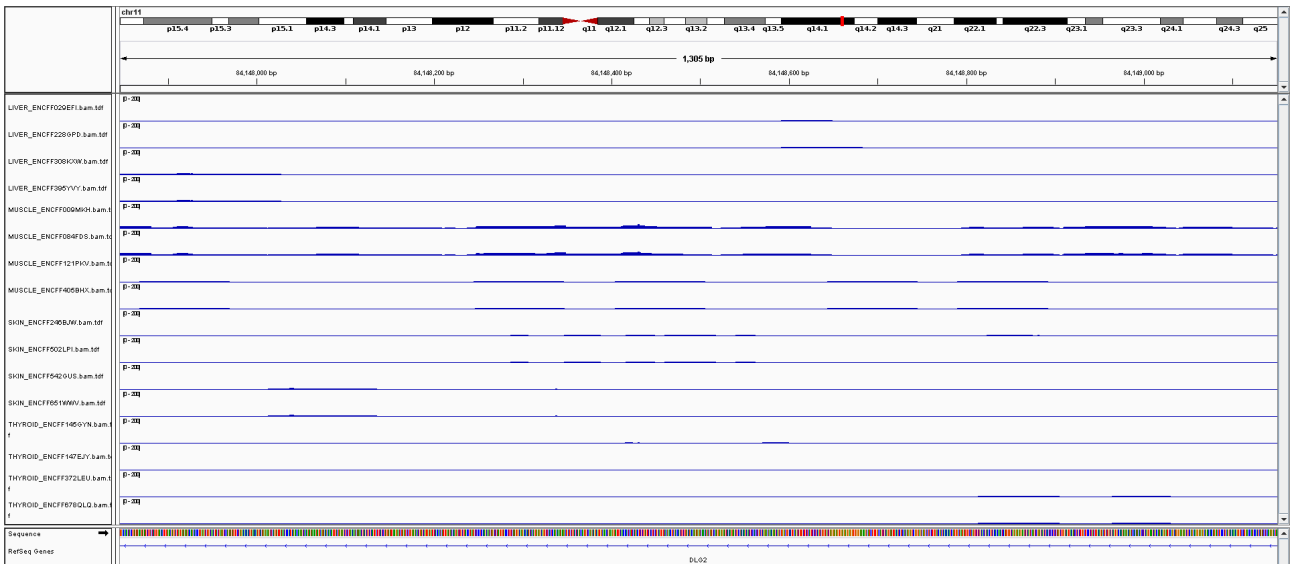

Figure S48: IGV visualization of ENCODE Fetal non-Brain BAM coverage in HPin8. The y-scales of all tracks have been manually set and fix to the 0-200 range.

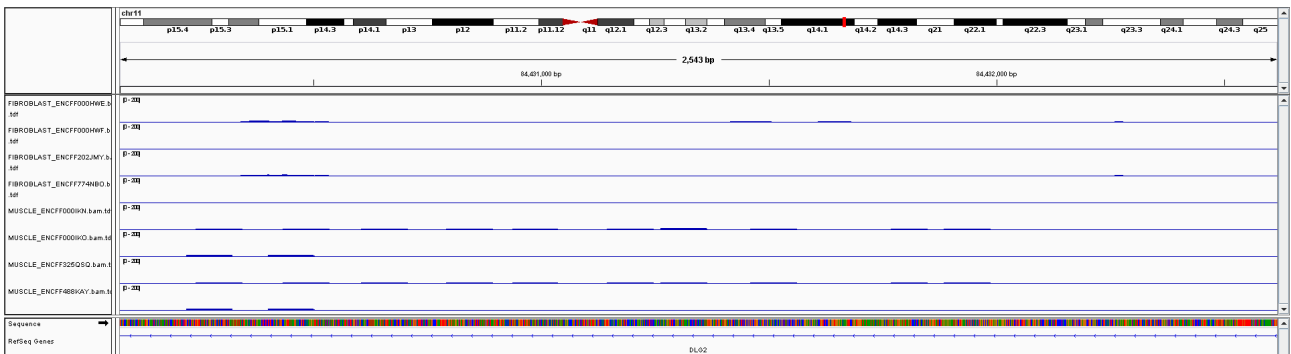

Figure S49: IGV visualization of ENCODE Adult non-Brain BAM coverage in HPin7. The y-scales of all tracks have been manually set and fix to the 0-200 range.

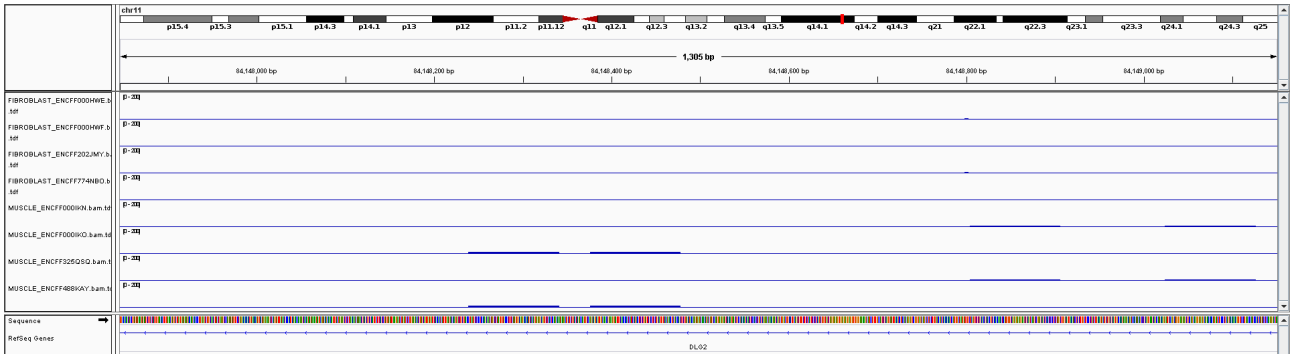

Figure S50: IGV visualization of ENCODE Adult non-Brain BAM coverage in HPin8. The y-scales of all tracks have been manually set and fix to the 0-200 range.

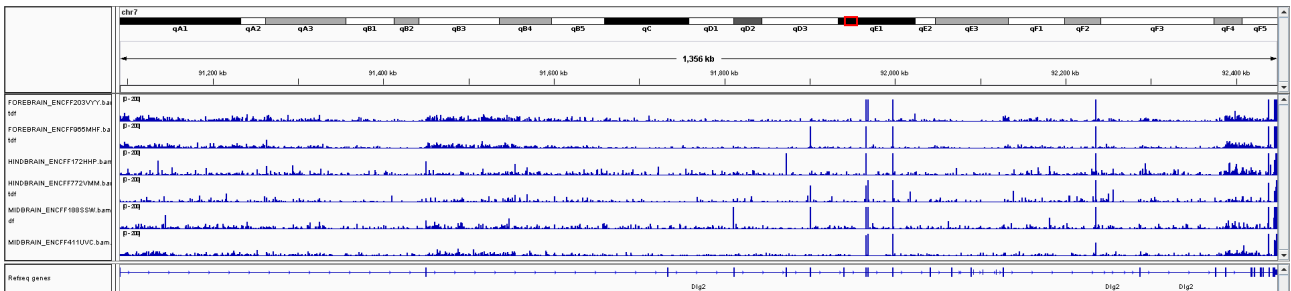

Figure S51: IGV visualization of ENCODE mouse newborn BAM coverage in *Dlg2*. The y-scales of all tracks have been manually set and fix to the 0-200 range.

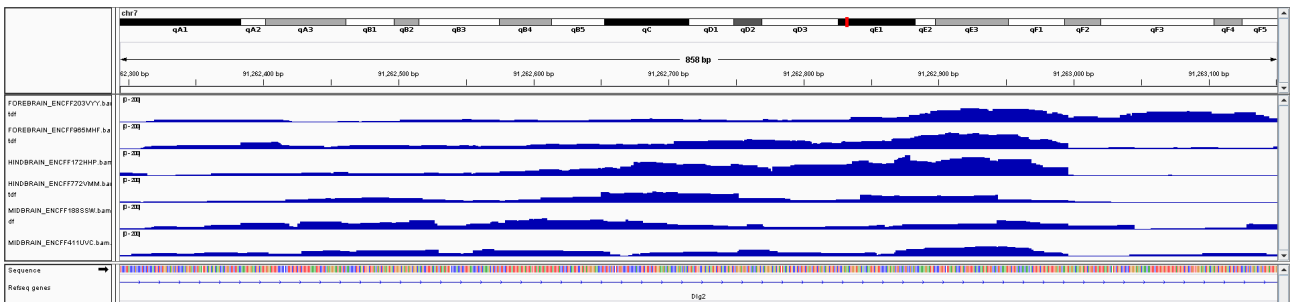

Figure S52: IGV visualization of ENCODE mouse newborn BAM coverage in mHPin1. The y-scales of all tracks have been manually set and fix to the 0-200 range. The splicing site is visible at location chr7:91262995-91262996

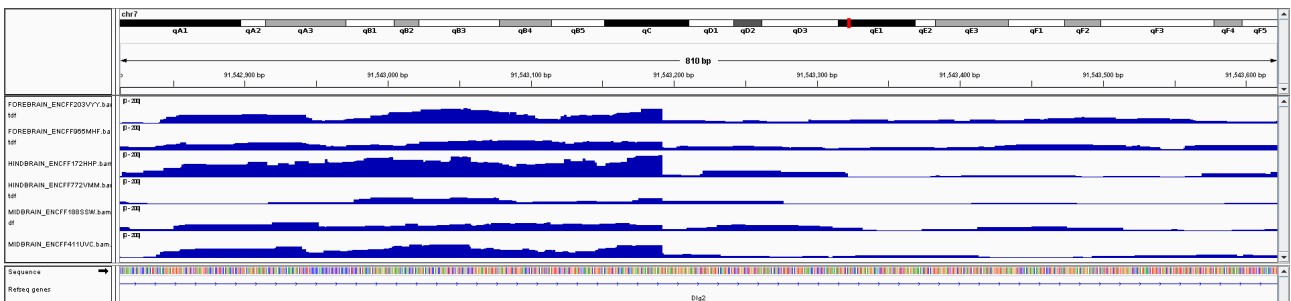

Figure S53: IGV visualization of ENCODE mouse newborn BAM coverage in mHPin1. The y-scales of all tracks have been manually set and fix to the 0-200 range. The splicing site is visible at location chr7:91543191-91543192

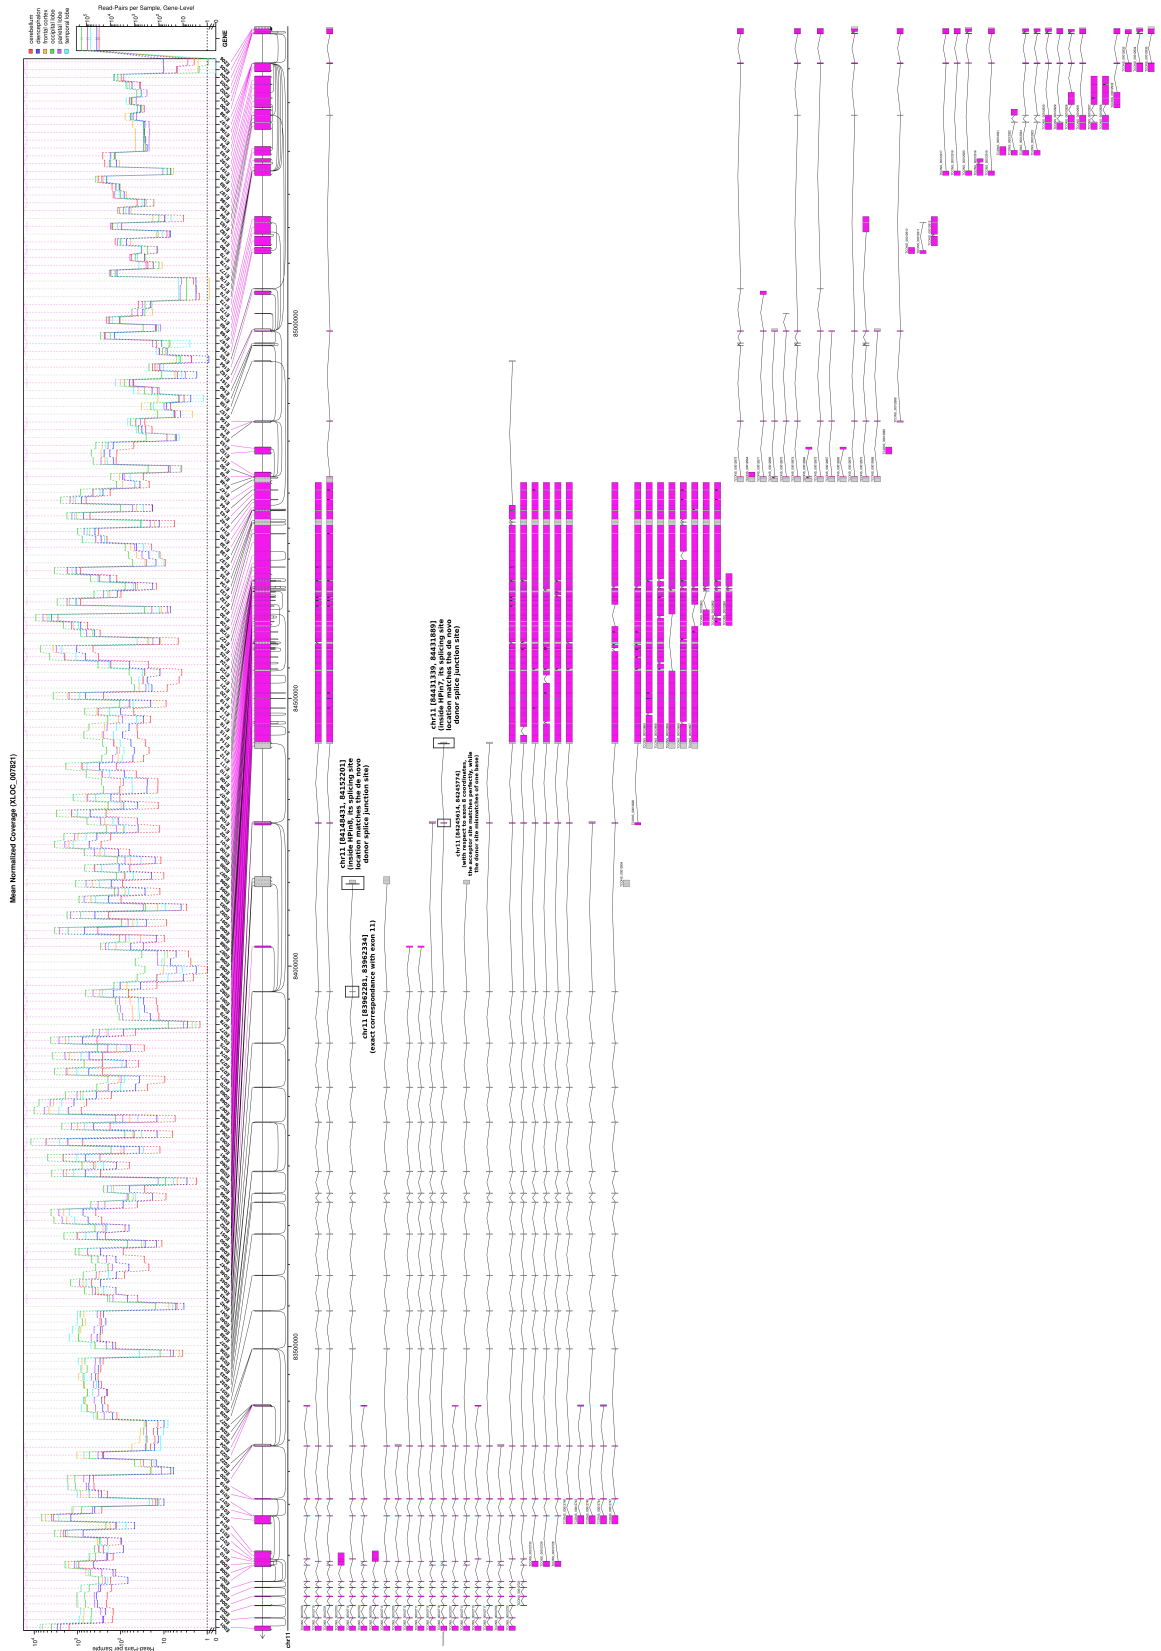

Figure S54: Fetal brain de novo transcriptome assembly of *DLG2*. (Continued on the following page.)



Figure S54: *cuffmerge* min-isoform-fraction parameter set at 0.05. Visualization realized with *JunctionSeq*. Annotation of HPin7 and HPin8 isoforms and coordinates added to the figure (please zoom on *DLG2* 7-9 region for reading). The figure is composed by three panels: the top-panel reports the expression of “exon” (in cufflinks de-novo transcriptome mode, exons are any part of the genome that has been transcribed); the middle panel show genomic coordinates along with unique exons aligned in a row; the bottom panel pictures the predicted isoforms. Some remarks or other useful information to interpret the image are the following (For more details, please see *JunctionSeq* documentation): a) in middle and bottom panels exons (boxes) are connected through edges, which stands for splicing events; b) in the middle panel, overlapping transcribed regions (detected in different isoforms) are merged and the original boundaries reported as dashed vertical lines, and the boundaries of the merged exons is a solid line; c) in the middle panel, oblique segments at the bottom of exons represent the starting or ending point of isoforms; d) in the middle panel the genomic coordinates are not linear (for visualization purposes). Coordinates of the merged transcribed genomic regions pictured in the middle panel are reported in Table S14; e) in any isoform, exons are plot with solid lines. Vertical dashed lines inside exons represent starting or ending points of exons belonging to other isoforms; f) exons might be colored with purple or gray, in the first case the expression between any two cohorts is significant, while in the second case it is not significant, but for our purposes this exons annotation is not interesting. Some consideration of figure are the following: a) the de novo (so without reference) transcriptome assembly performed by cufflinks starting with paired-end RNA-Seq data of fetal brain tissue finds the *DLG2* gene, from Table S14 the coordinate is chr11:83166048-85339790 (RefSeq *DLG2* is chr11:83166056-85338314); b) Tables S15 and S16 report the de novo transcriptome coordinates that overlap *DLG2* UCSC exons (Table S1) and *DLG2* Ensembl exons (Table S2), respectively. De Novo (DN) *DLG2* overlaps 76.28% of *DLG2* UCSC (exon 10 is completely missing) and 75.04% of *DLG2* Ensembl (exons 3, 16, 17, 19, 30, 31, 33, 34 are completely missing); c) DN *DLG2* exon number 110 (chr11:84146499-84155193) includes HPin8 (chr11:84147846-84149151). The isoforms starting from HPin8 splice into *DLG2* exon 11; d) DN *DLG2* exon number 57 (chr11:84425769-84827382) includes HPin7 (chr11:84430074-84432618). The isoforms starting from HPin7 splice into *DLG2* exon 8; e) DN *DLG2* exon number 57 (DNe57) is 401613 base-pairs (bp) wide, very far away from the 170bp reported in [6]. At the edges of this region are located HPin7 and UCSC exon 6. DNe57 is still present in several isoforms which level of abundance is above 0.50 (not shown). This de novo predicted abnormal long exon (from exon 6 to HPin7) is probably due to the difficulty for cufflinks to deal with nascent transcription known to be present in brain mRNAs [7].

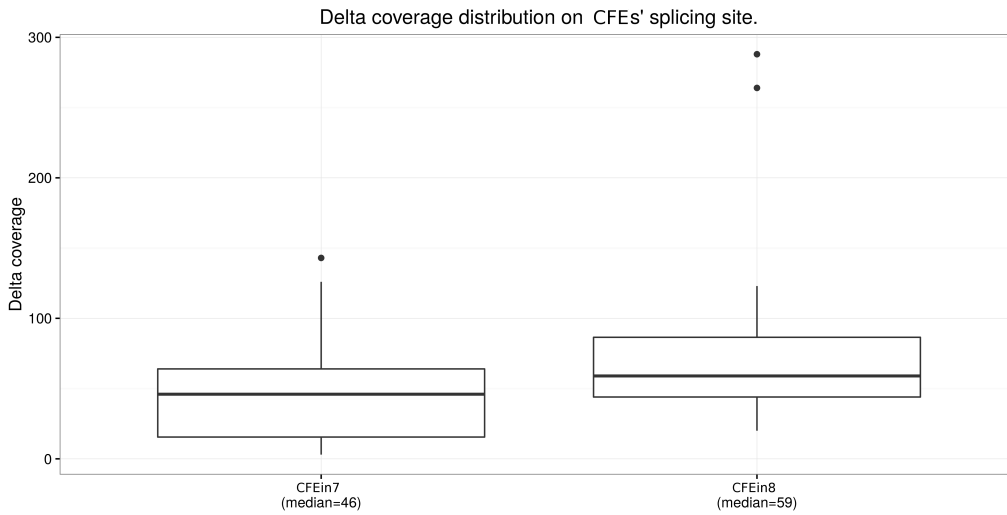

Figure S55: CFEin7 and CFEin8 delta coverage distribution via boxplot representation.

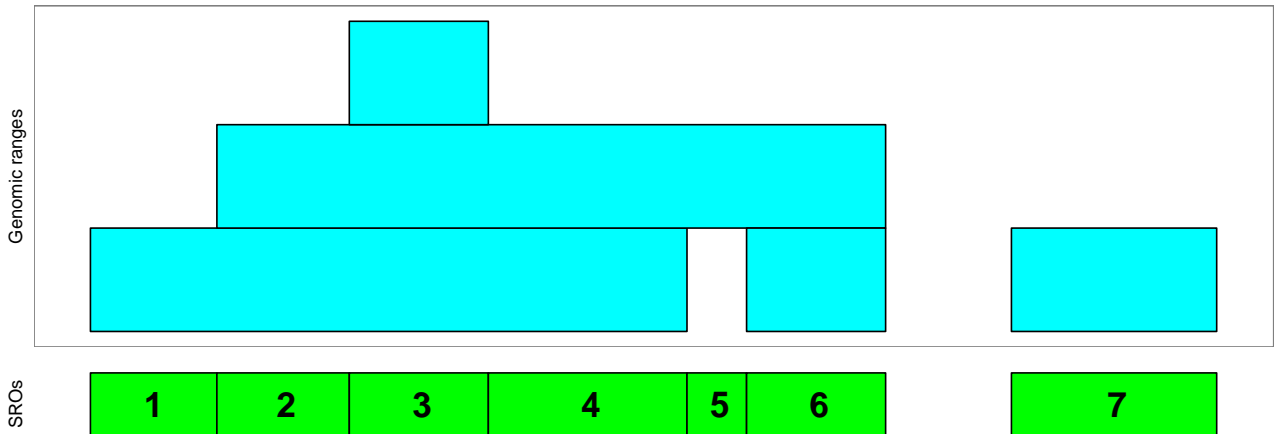

Figure S56: Example of Smallest Regions of Overlap (SROs) from a set of Genomic Ranges (GR). We define the Smallest Regions of Overlap (SROs) of a set of Genomic Ranges (GR) as their disjoint ranges. By definition then, SROs do not overlap each other and SRO's coverage equals the GR's one. In R programming language, the *disjoin* function of *GenomicRanges* package returns the SROs from a collection of GR. In this example, 7 SROs (in green) are created from 5 GR.

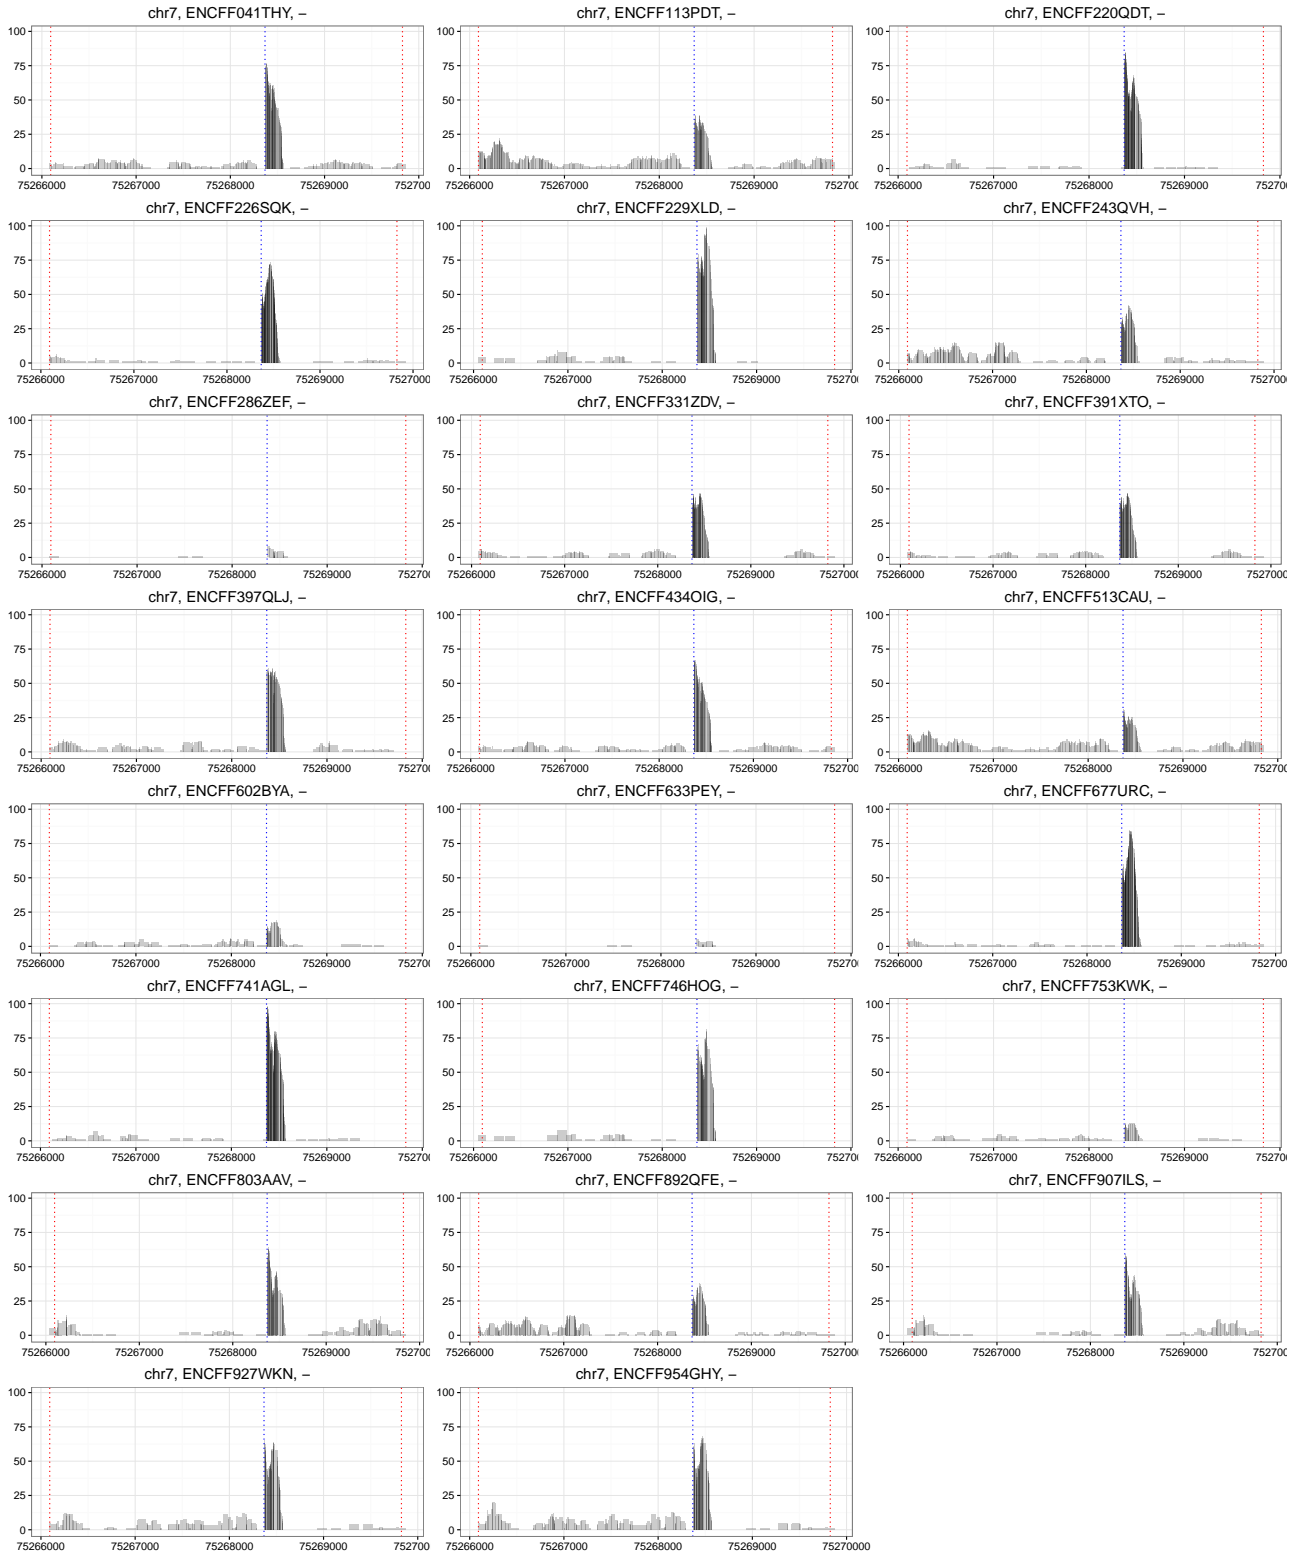

Figure S57: Read coverage in 23 fetal brain BAM files regarding *HIP1* gene at chr7:75266093-75269827. Red lines define the SRO region, while the blue one pinpoint the splicing site. The title of every subplot provides three information: chromosome location, BAM file name, and gene strand.

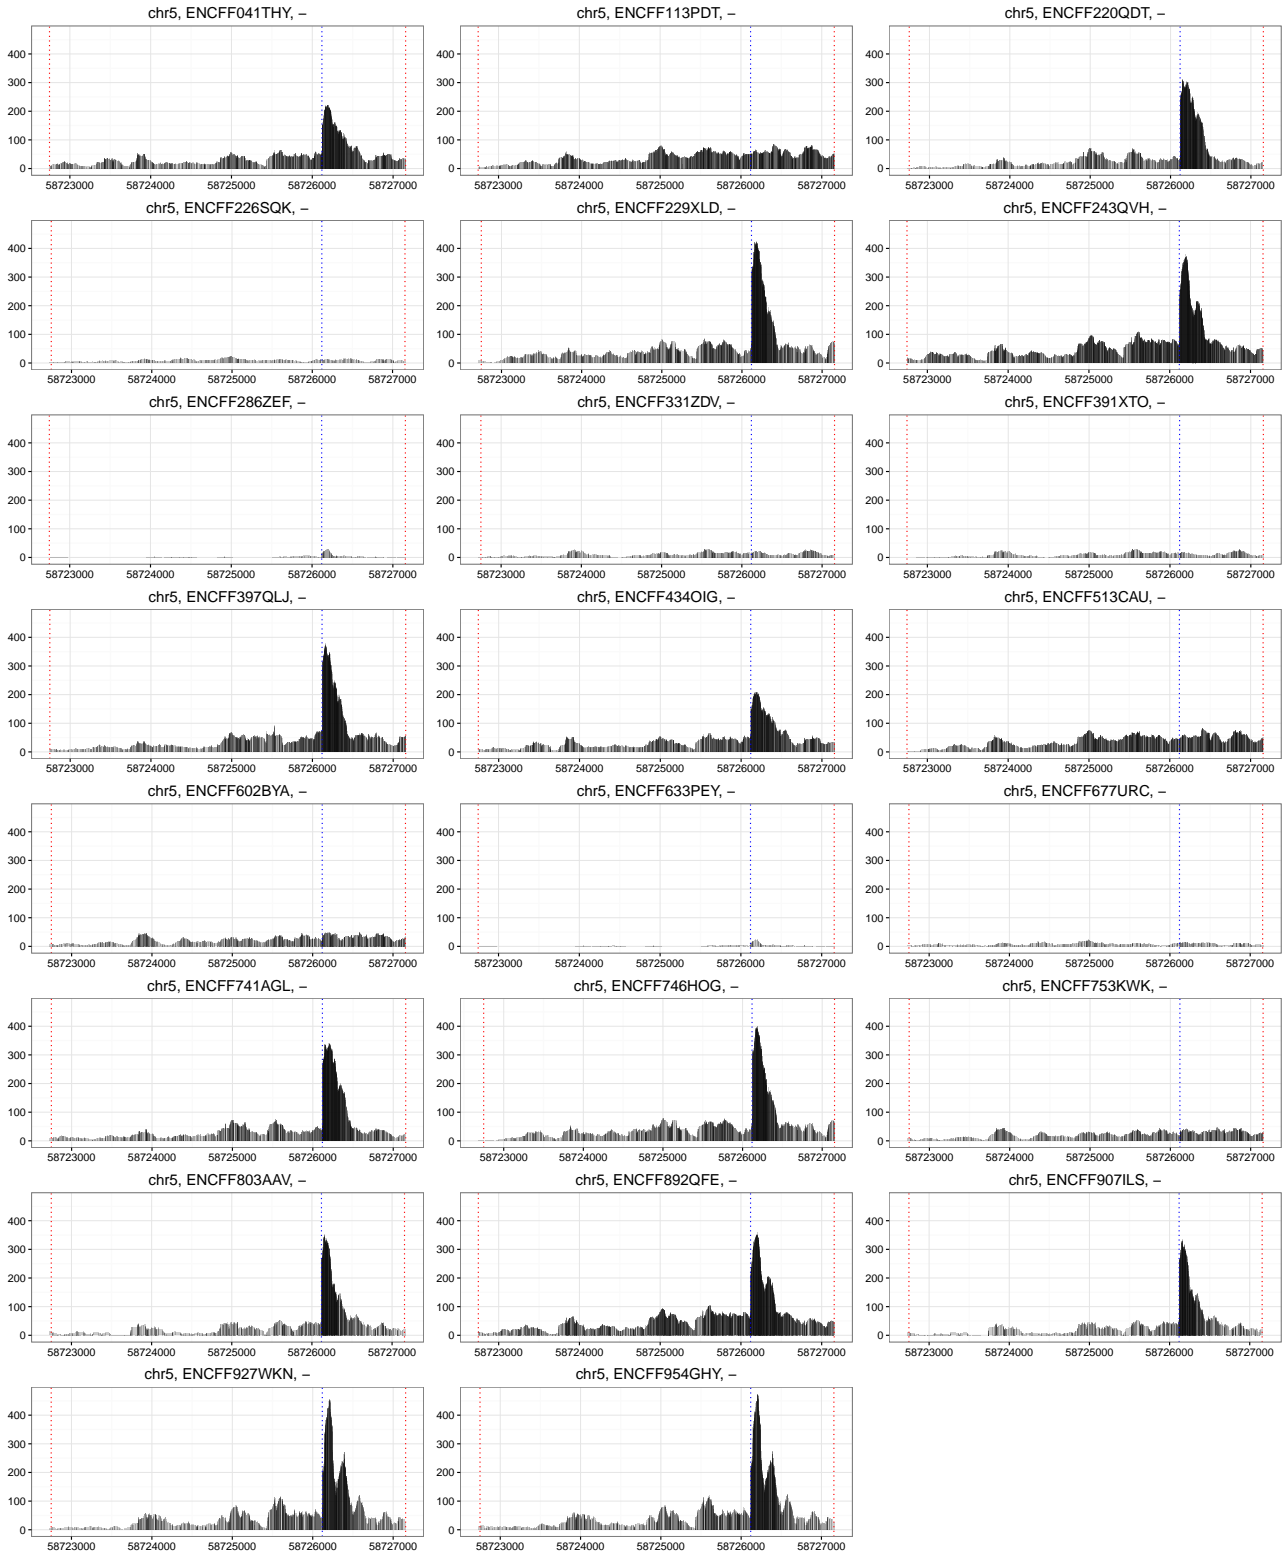

Figure S58: Read coverage in 23 fetal brain BAM files regarding *PDE4D* gene at chr5:58722748-58727155. Red lines define the SRO region, while the blue one pinpoint the splicing site. The title of every subplot provides three information: chromosome location, BAM file name, and gene strand.

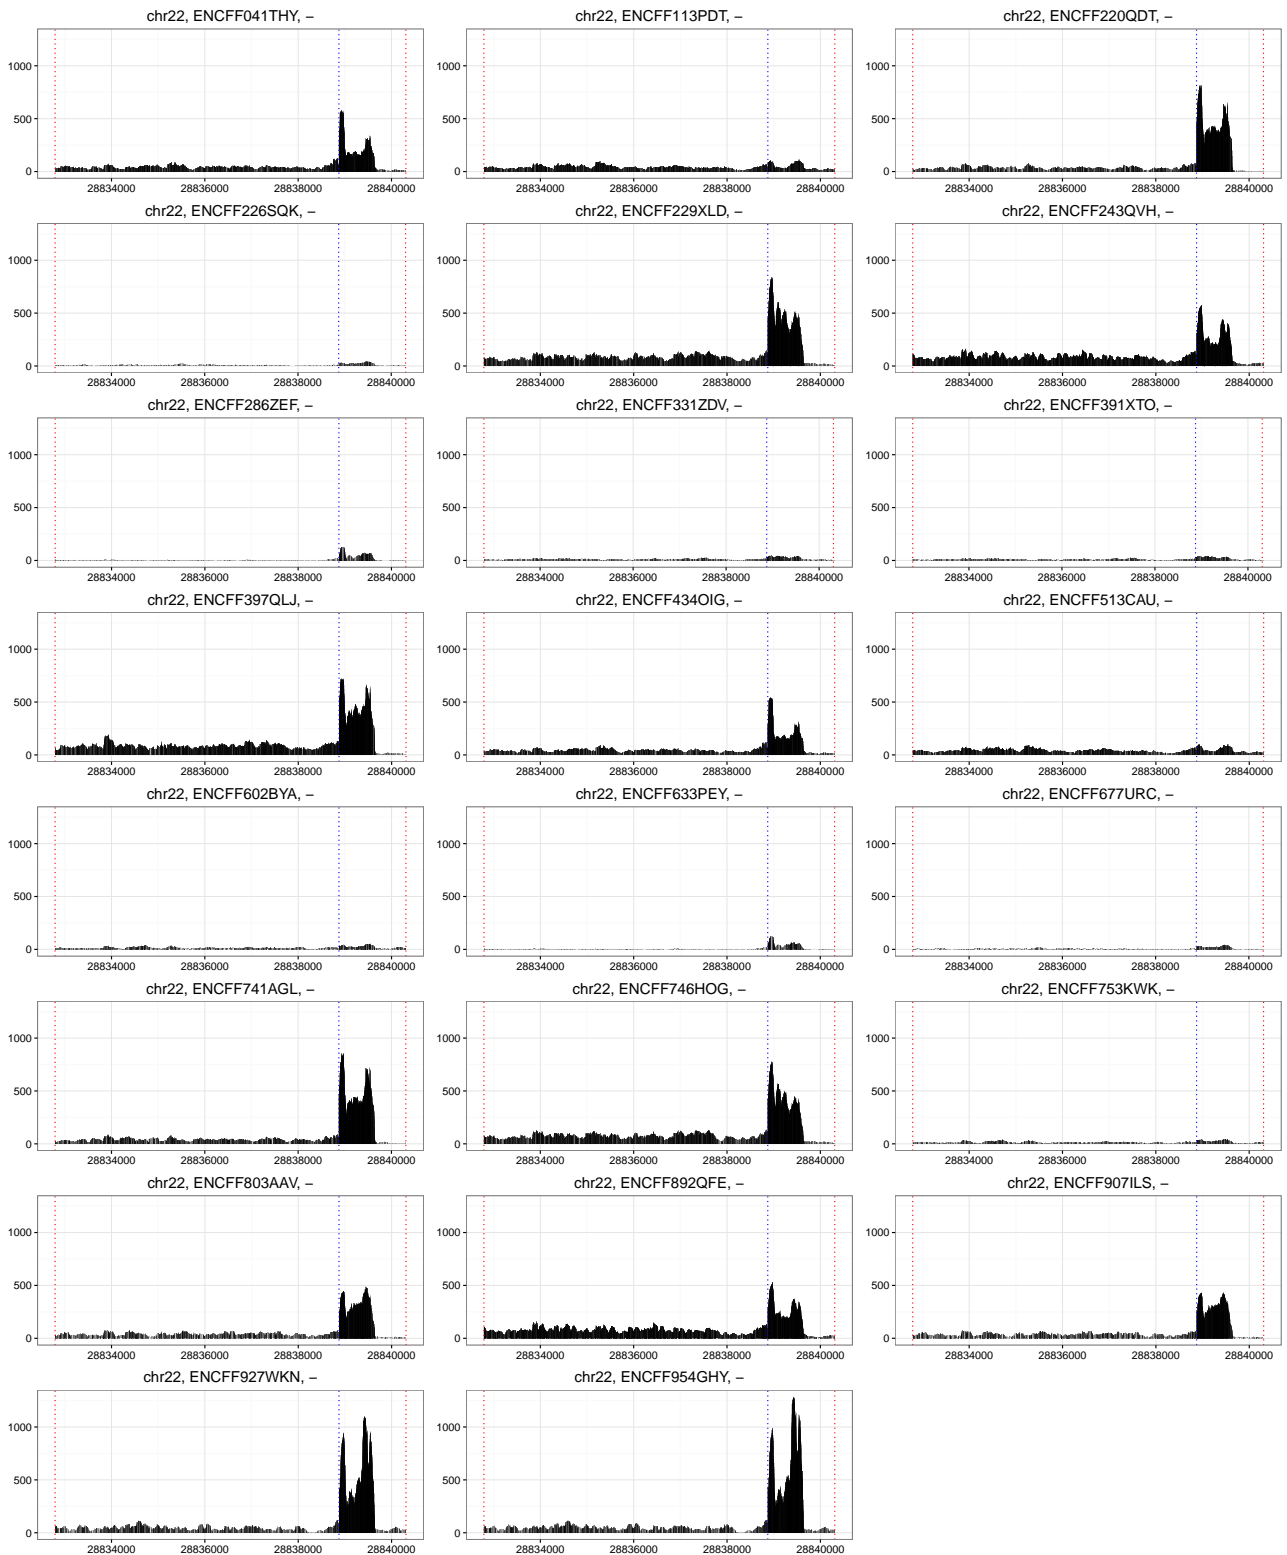

Figure S59: Read coverage in 23 fetal brain BAM files regarding *TTC28* gene at chr22:28832791-28840308. Red lines define the SRO region, while the blue one pinpoint the splicing site. The title of every subplot provides three information: chromosome location, BAM file name, and gene strand.

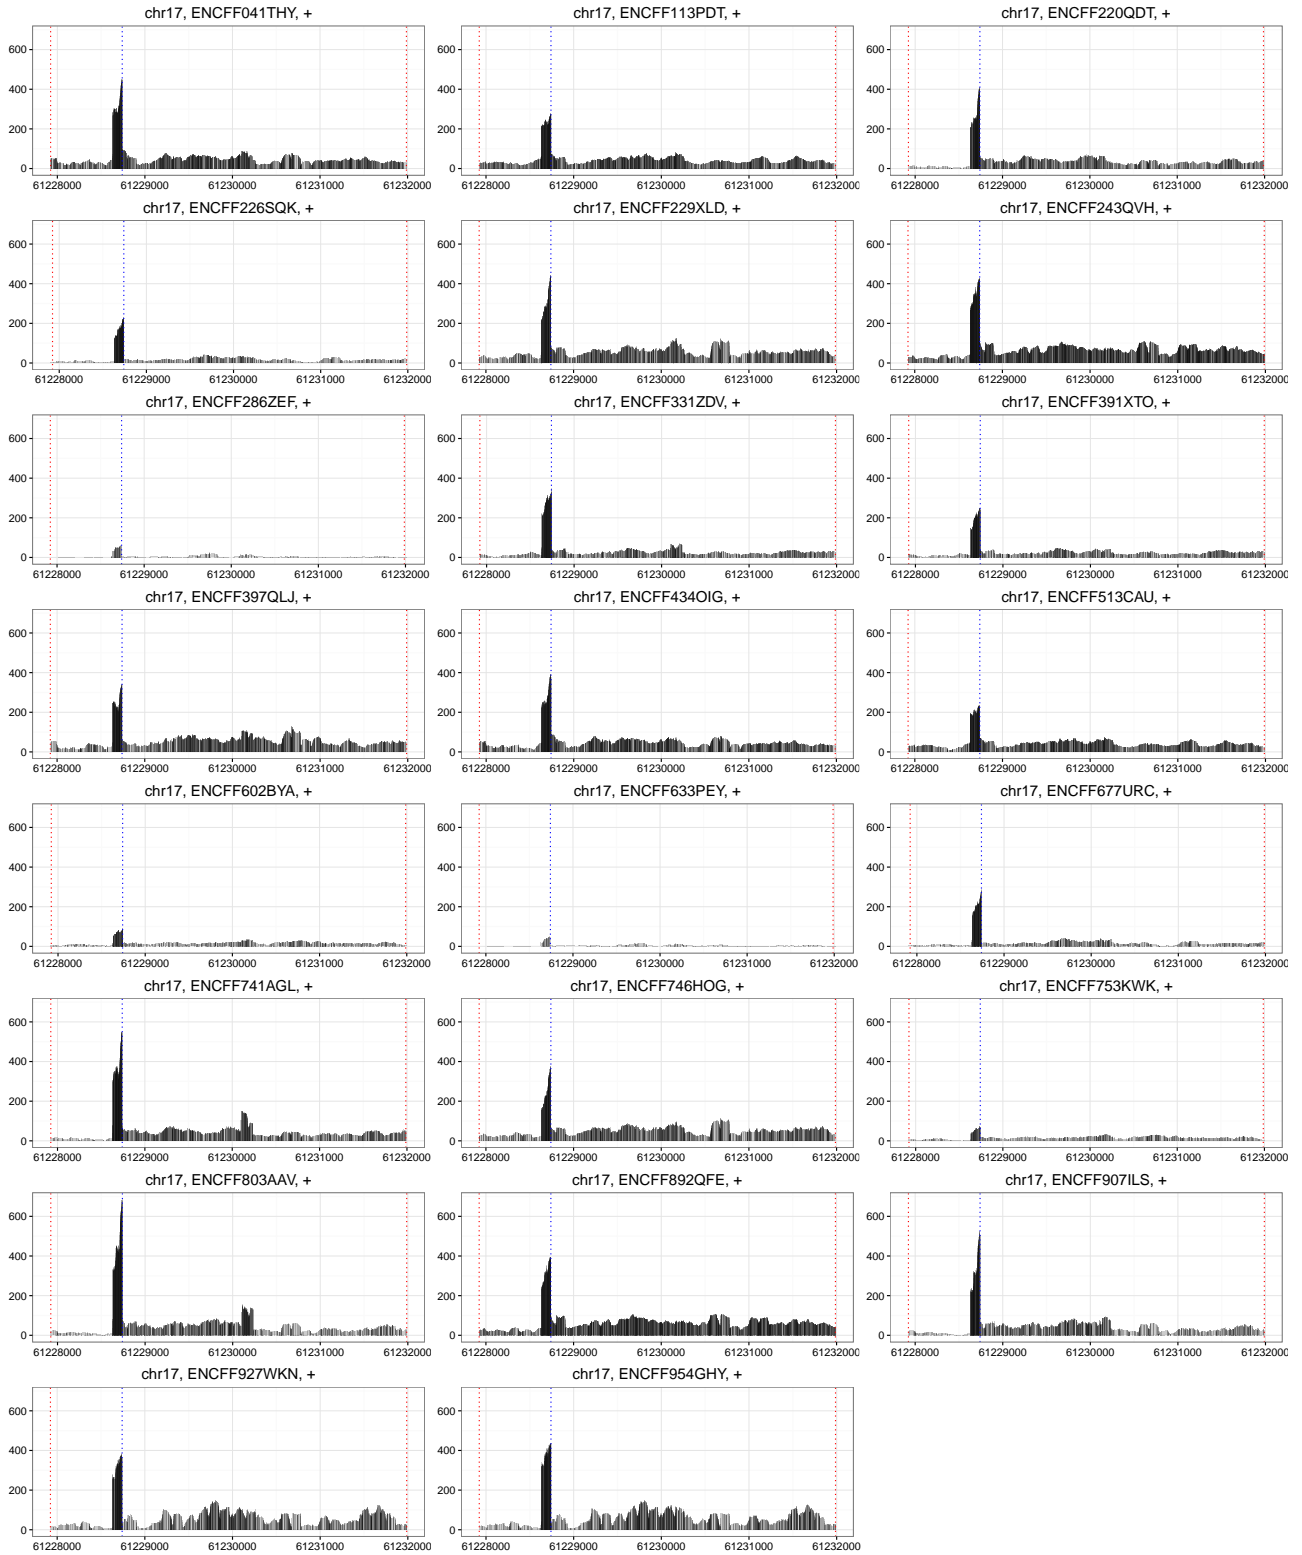

Figure S60: Read coverage in 23 fetal brain BAM files regarding *TANC2* gene at chr17:61227923-61231987. Red lines define the SRO region, while the blue one pinpoint the splicing site. The title of every subplot provides three information: chromosome location, BAM file name, and gene strand.

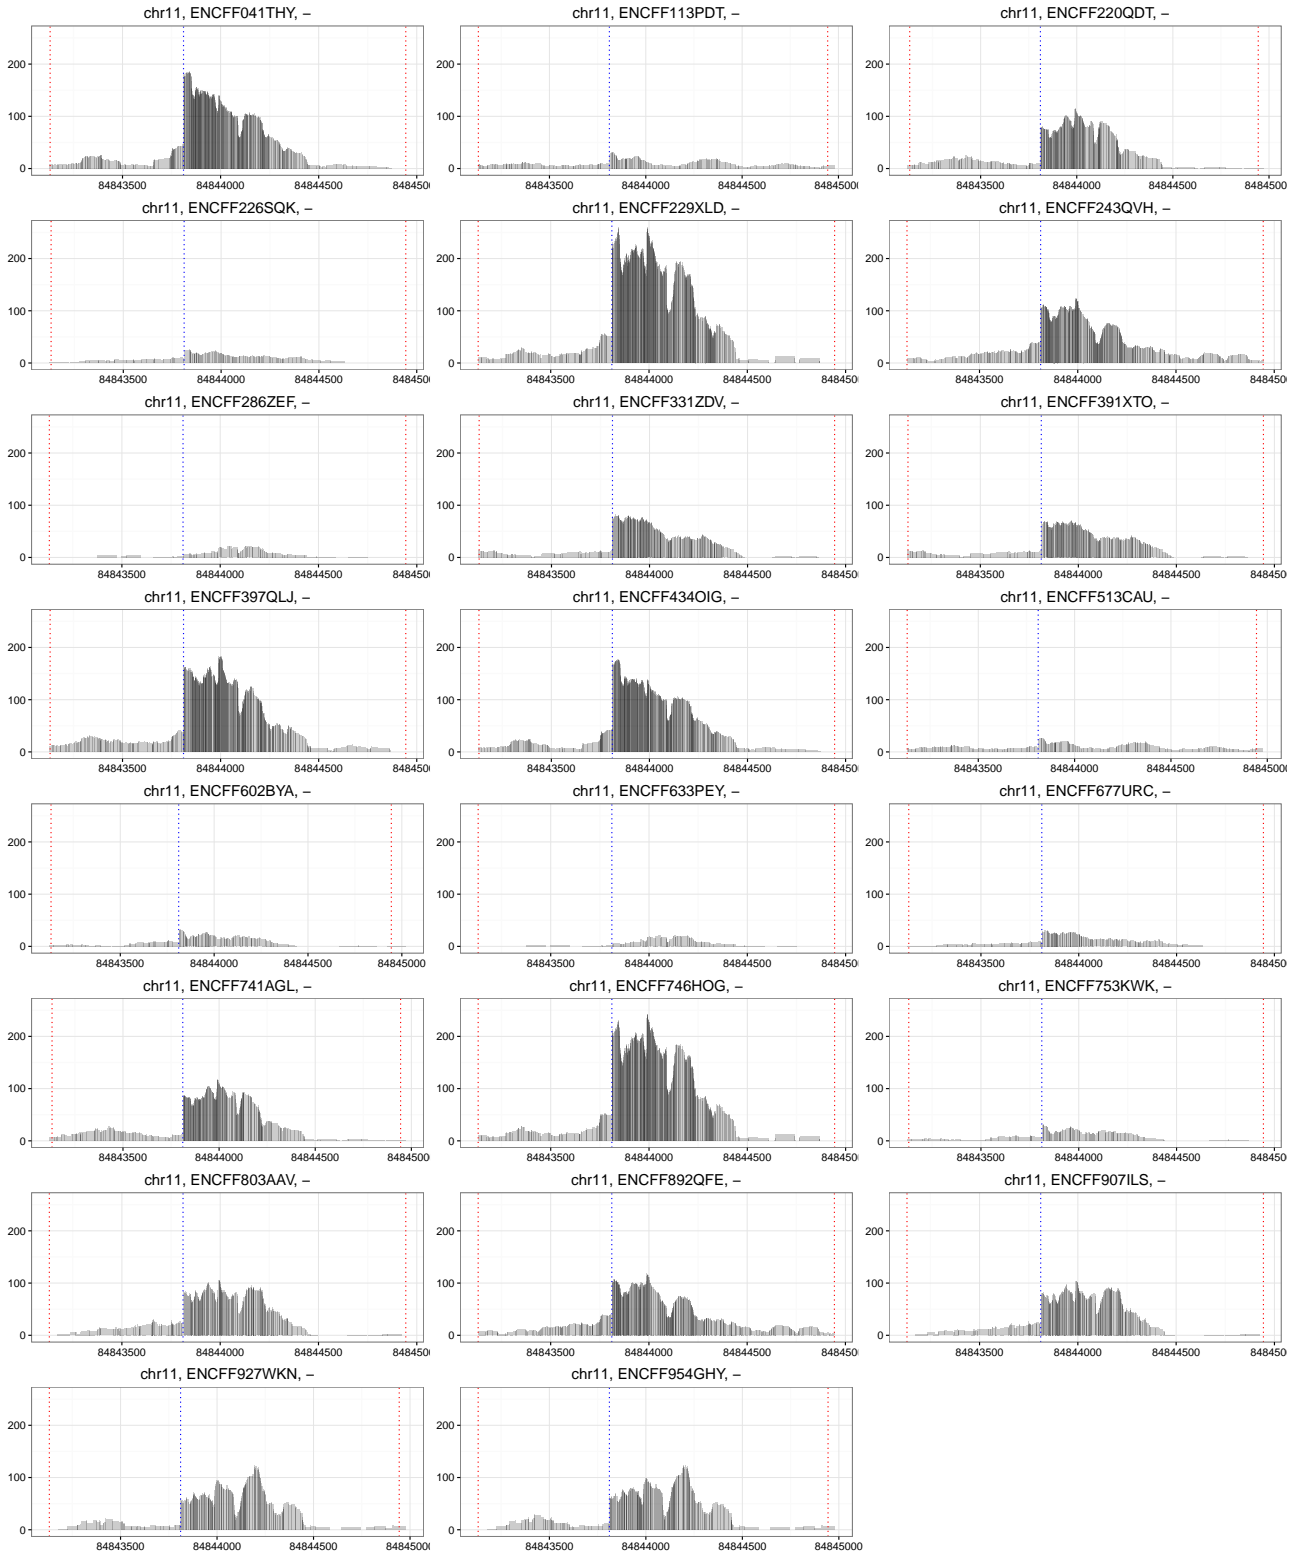

Figure S61: Read coverage in 23 fetal brain BAM files regarding *DLG2* gene at chr11:84843131-84844944. Red lines define the SRO region, while the blue one pinpoint the splicing site. The title of every subplot provides three information: chromosome location, BAM file name, and gene strand.

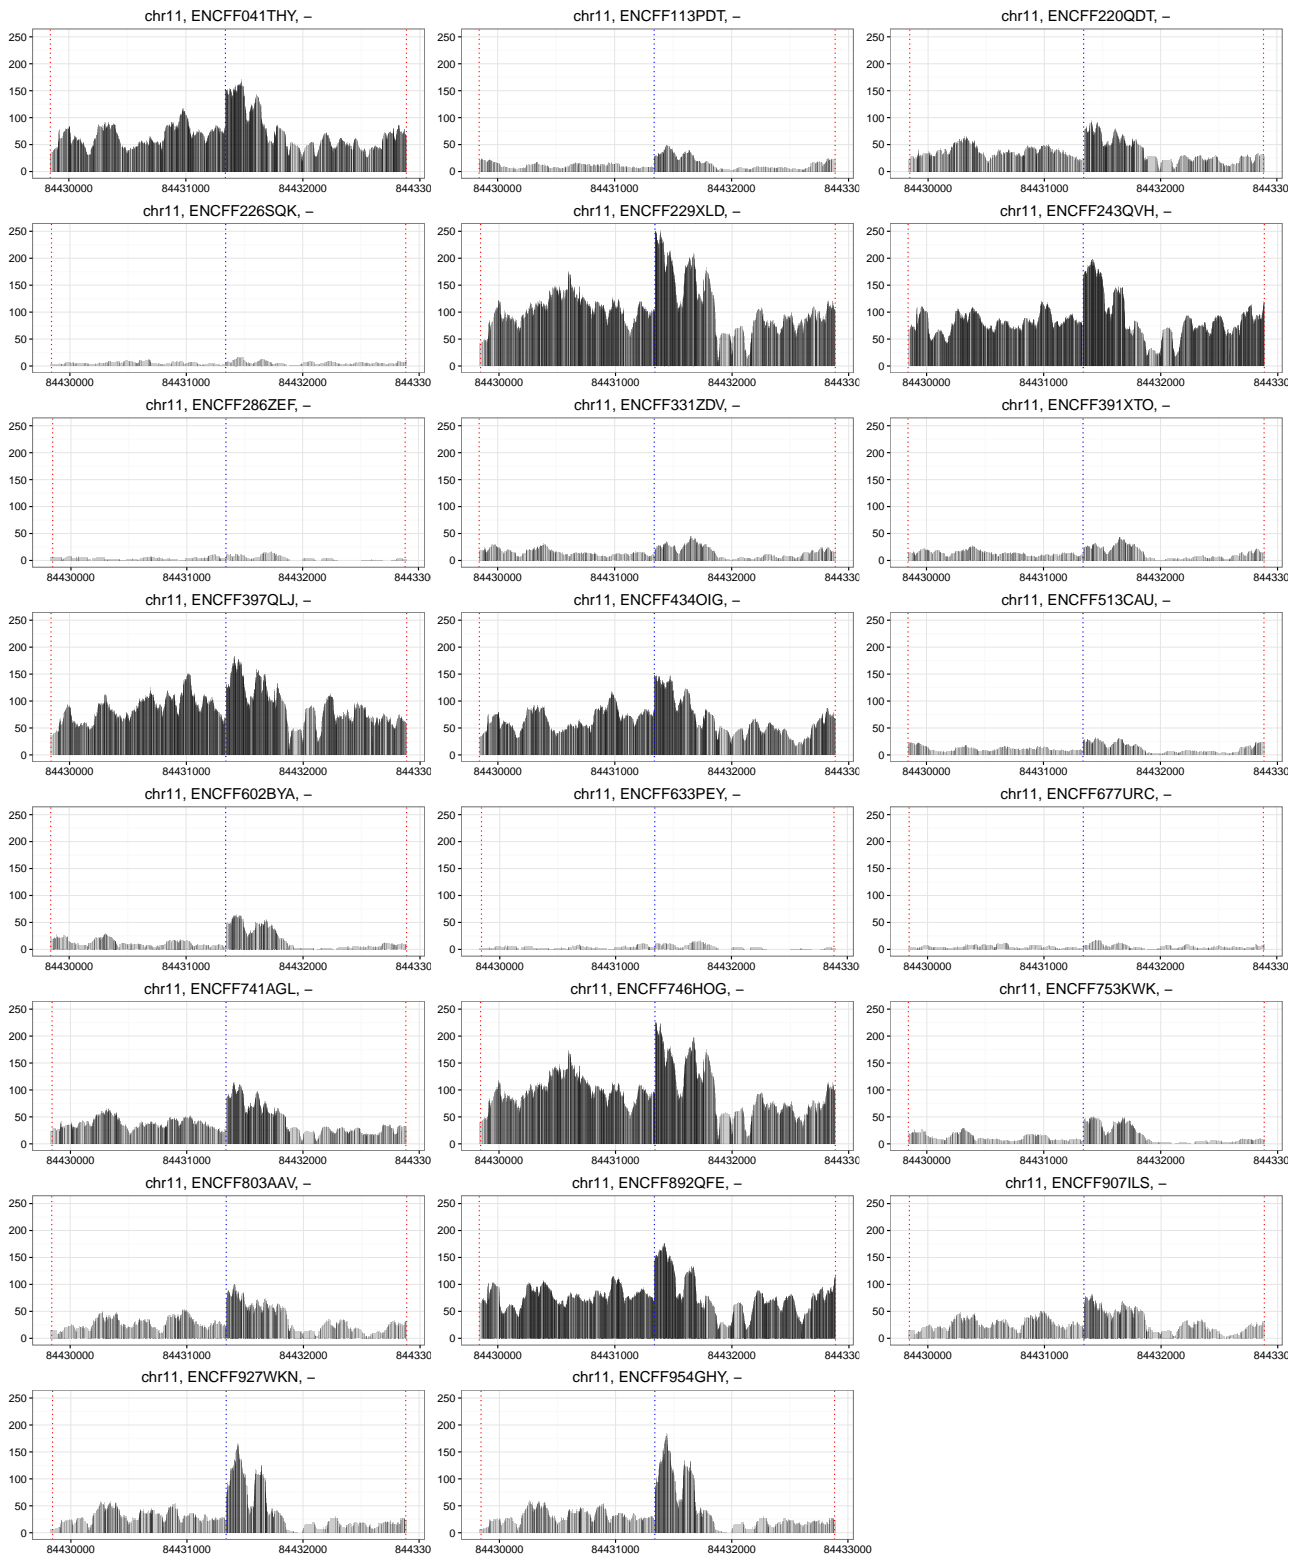

Figure S62: Read coverage in 23 fetal brain BAM files regarding *DLG2* gene at chr11:84429842-84432885. Red lines define the SRO region, while the blue one pinpoint the splicing site. The title of every subplot provides three information: chromosome location, BAM file name, and gene strand.



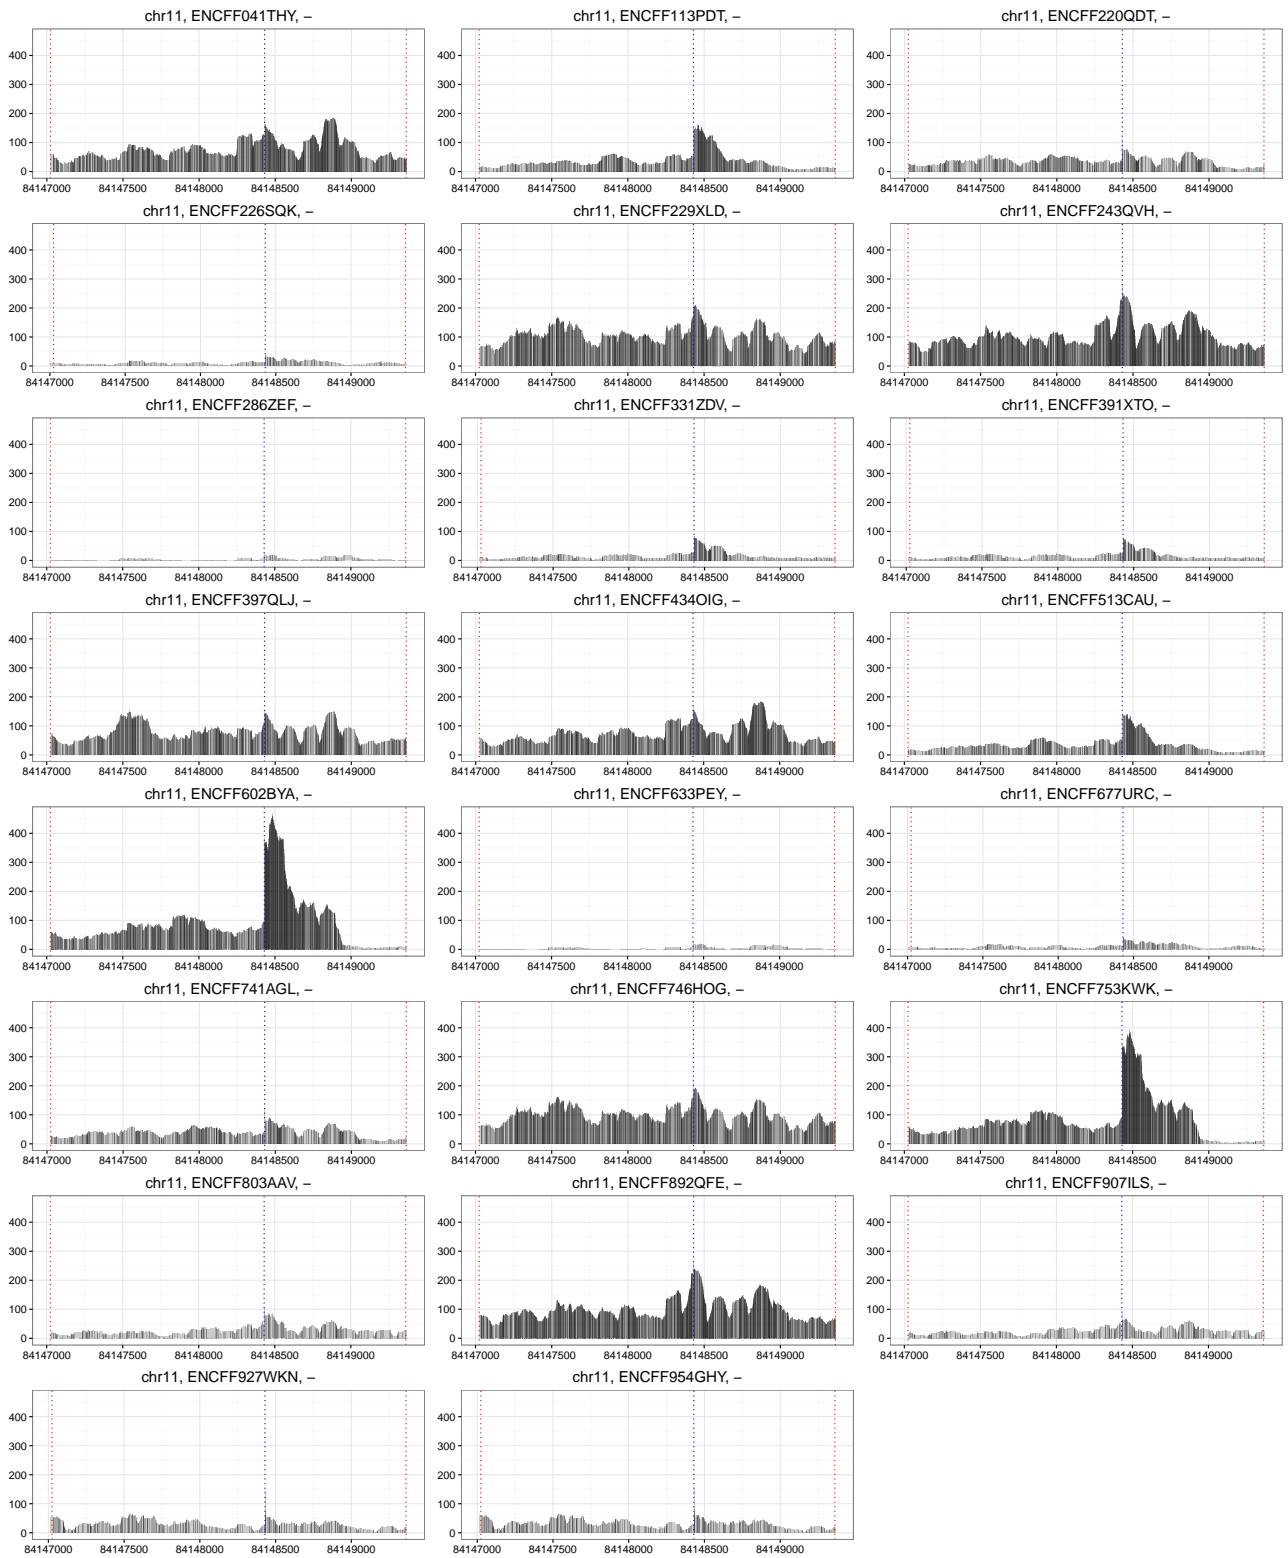

Figure S63: Read coverage in 23 fetal brain BAM files regarding *DLG2* gene at chr11:84147024-84149361. Red lines define the SRO region, while the blue one pinpoint the splicing site. The title of every subplot provides three information: chromosome location, BAM file name, and gene strand.

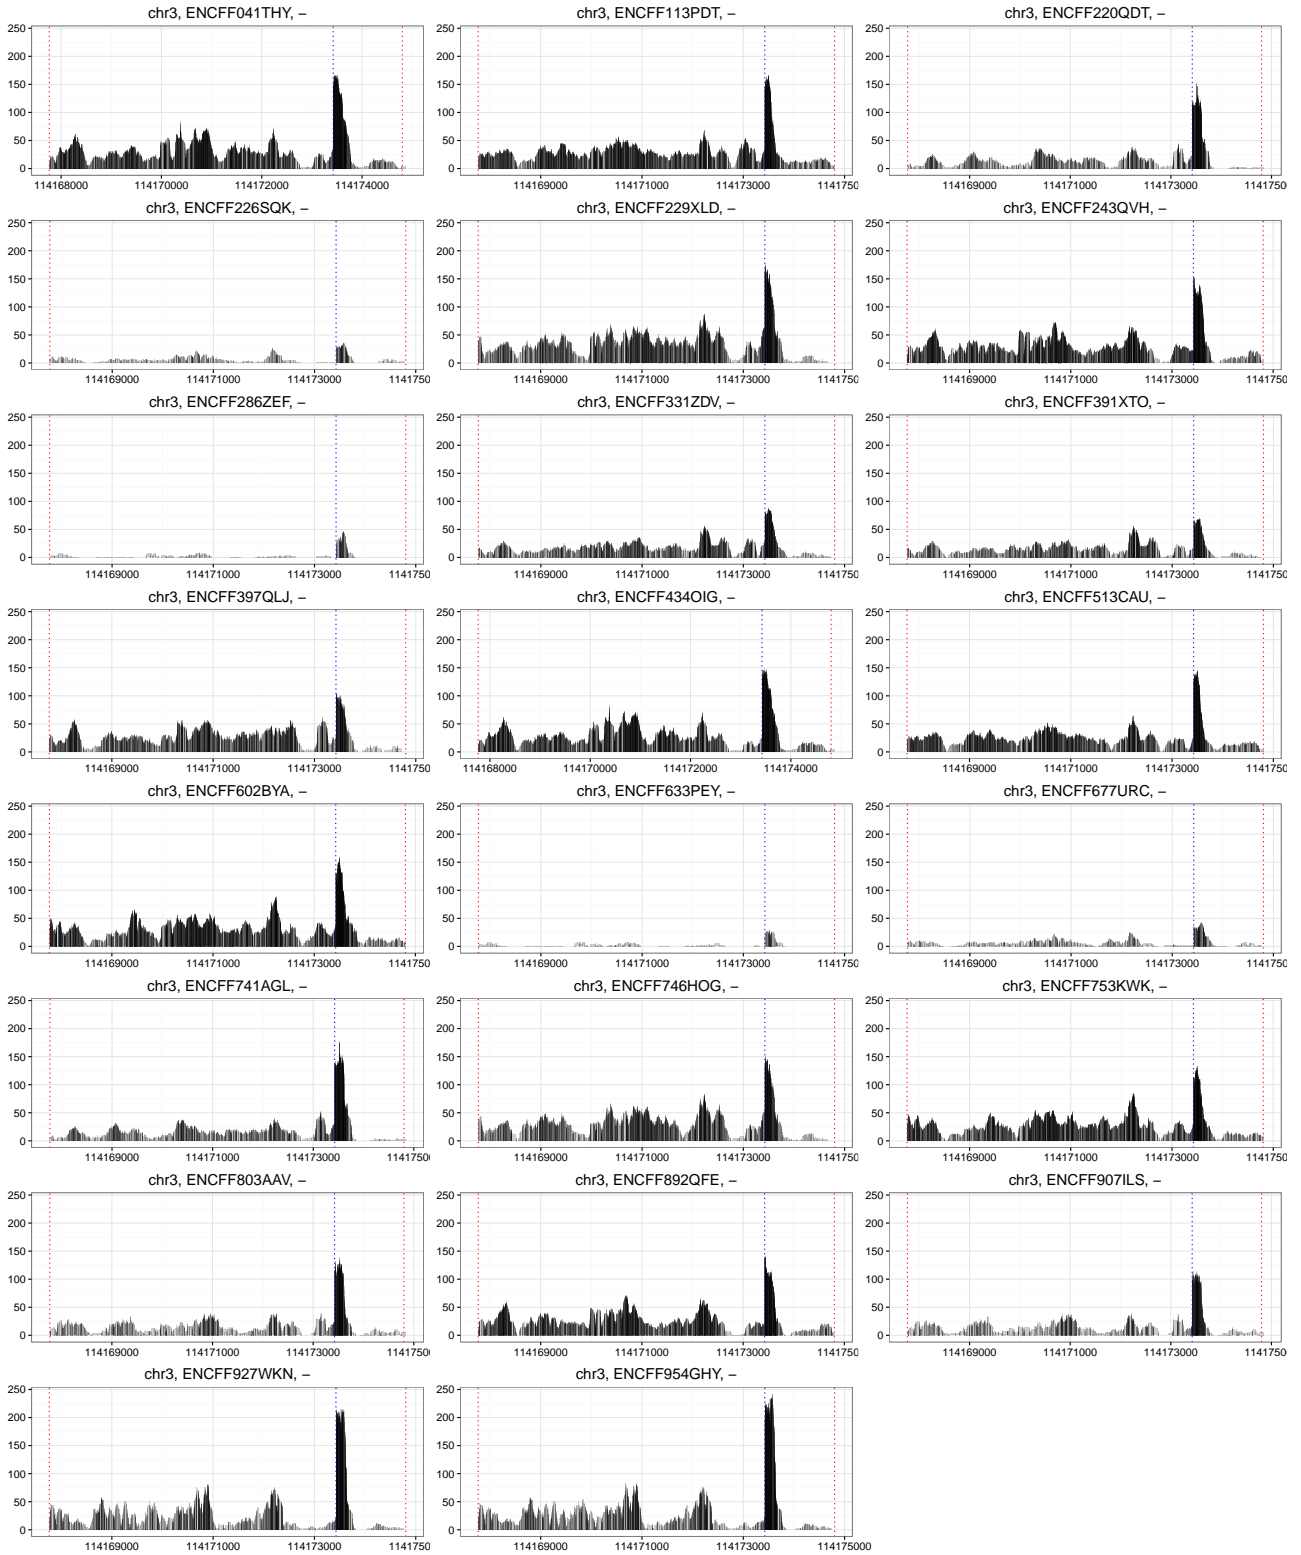

Figure S64: Read coverage in 23 fetal brain BAM files regarding *ZBTB20* gene at chr3:114167766-114174803. Red lines define the SRO region, while the blue one pinpoint the splicing site. The title of every subplot provides three information: chromosome location, BAM file name, and gene strand.

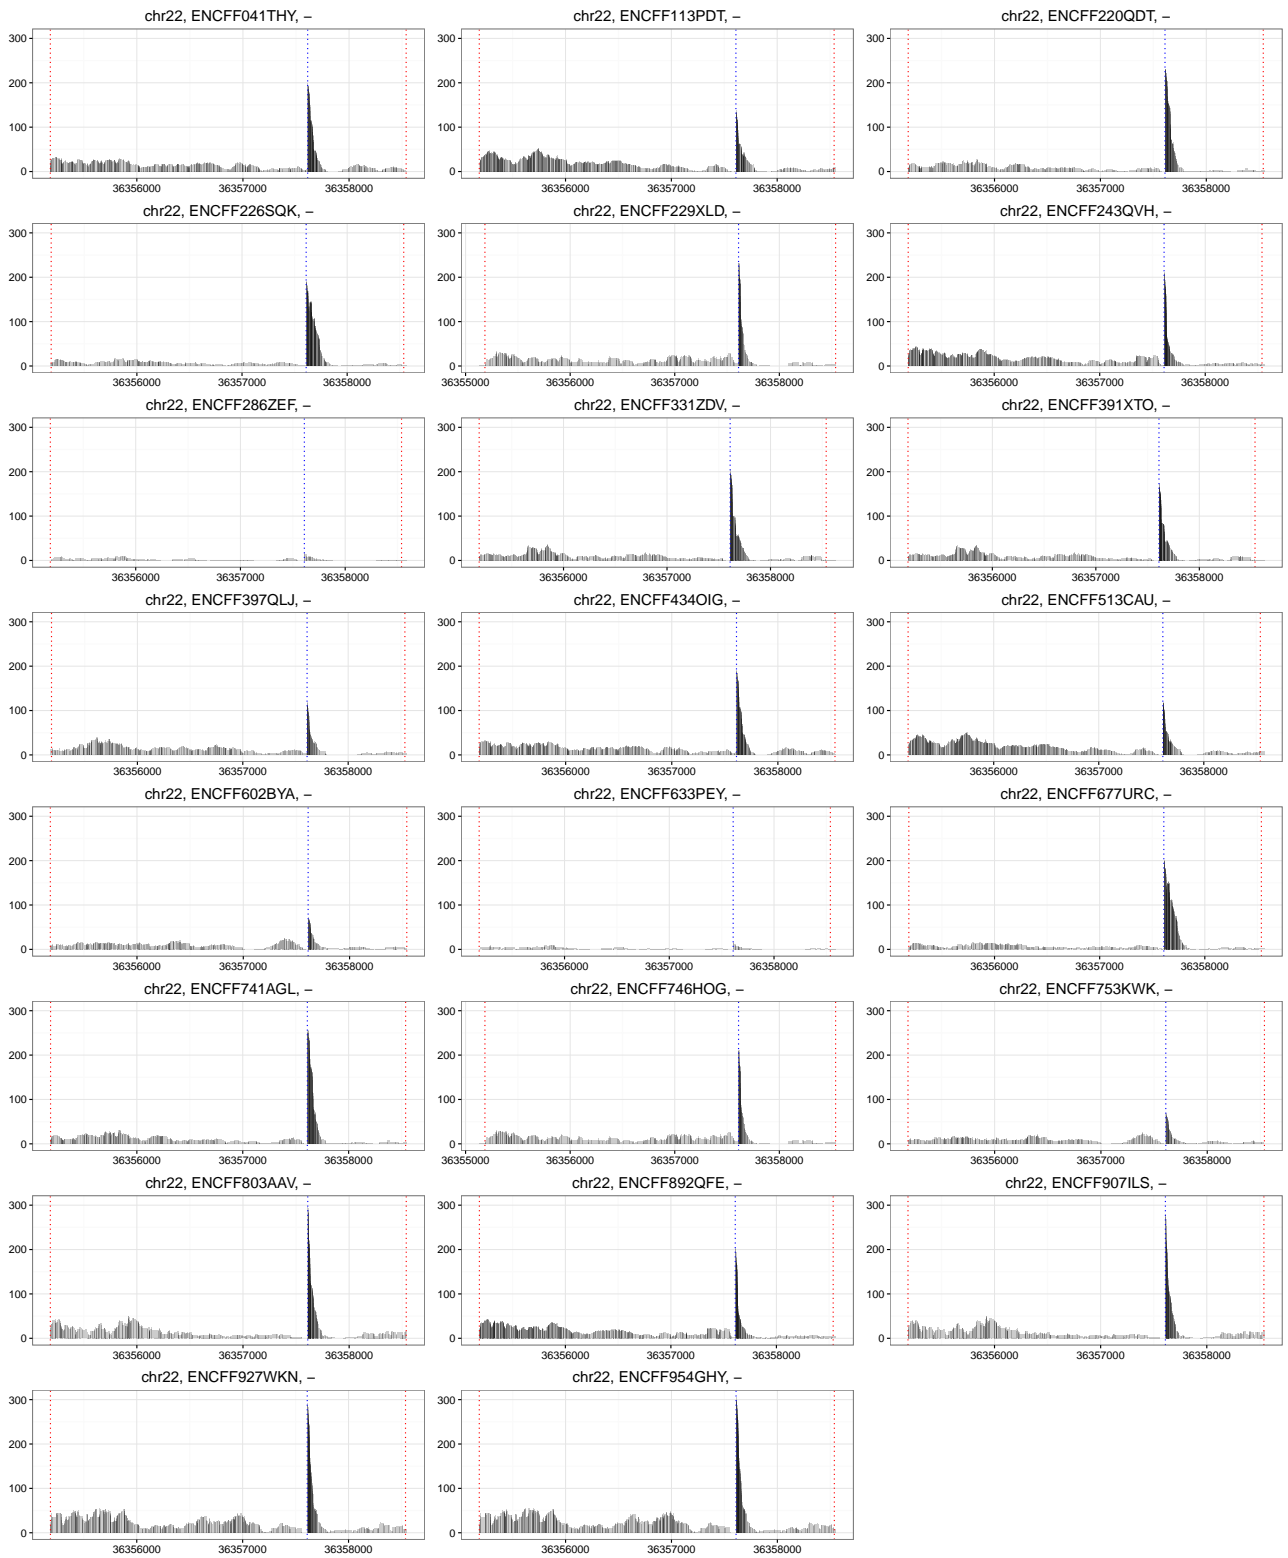

Figure S65: Read coverage in 23 fetal brain BAM files regarding *RBFOX2* gene at chr22:36355185-36358538. Red lines define the SRO region, while the blue one pinpoint the splicing site. The title of every subplot provides three information: chromosome location, BAM file name, and gene strand.

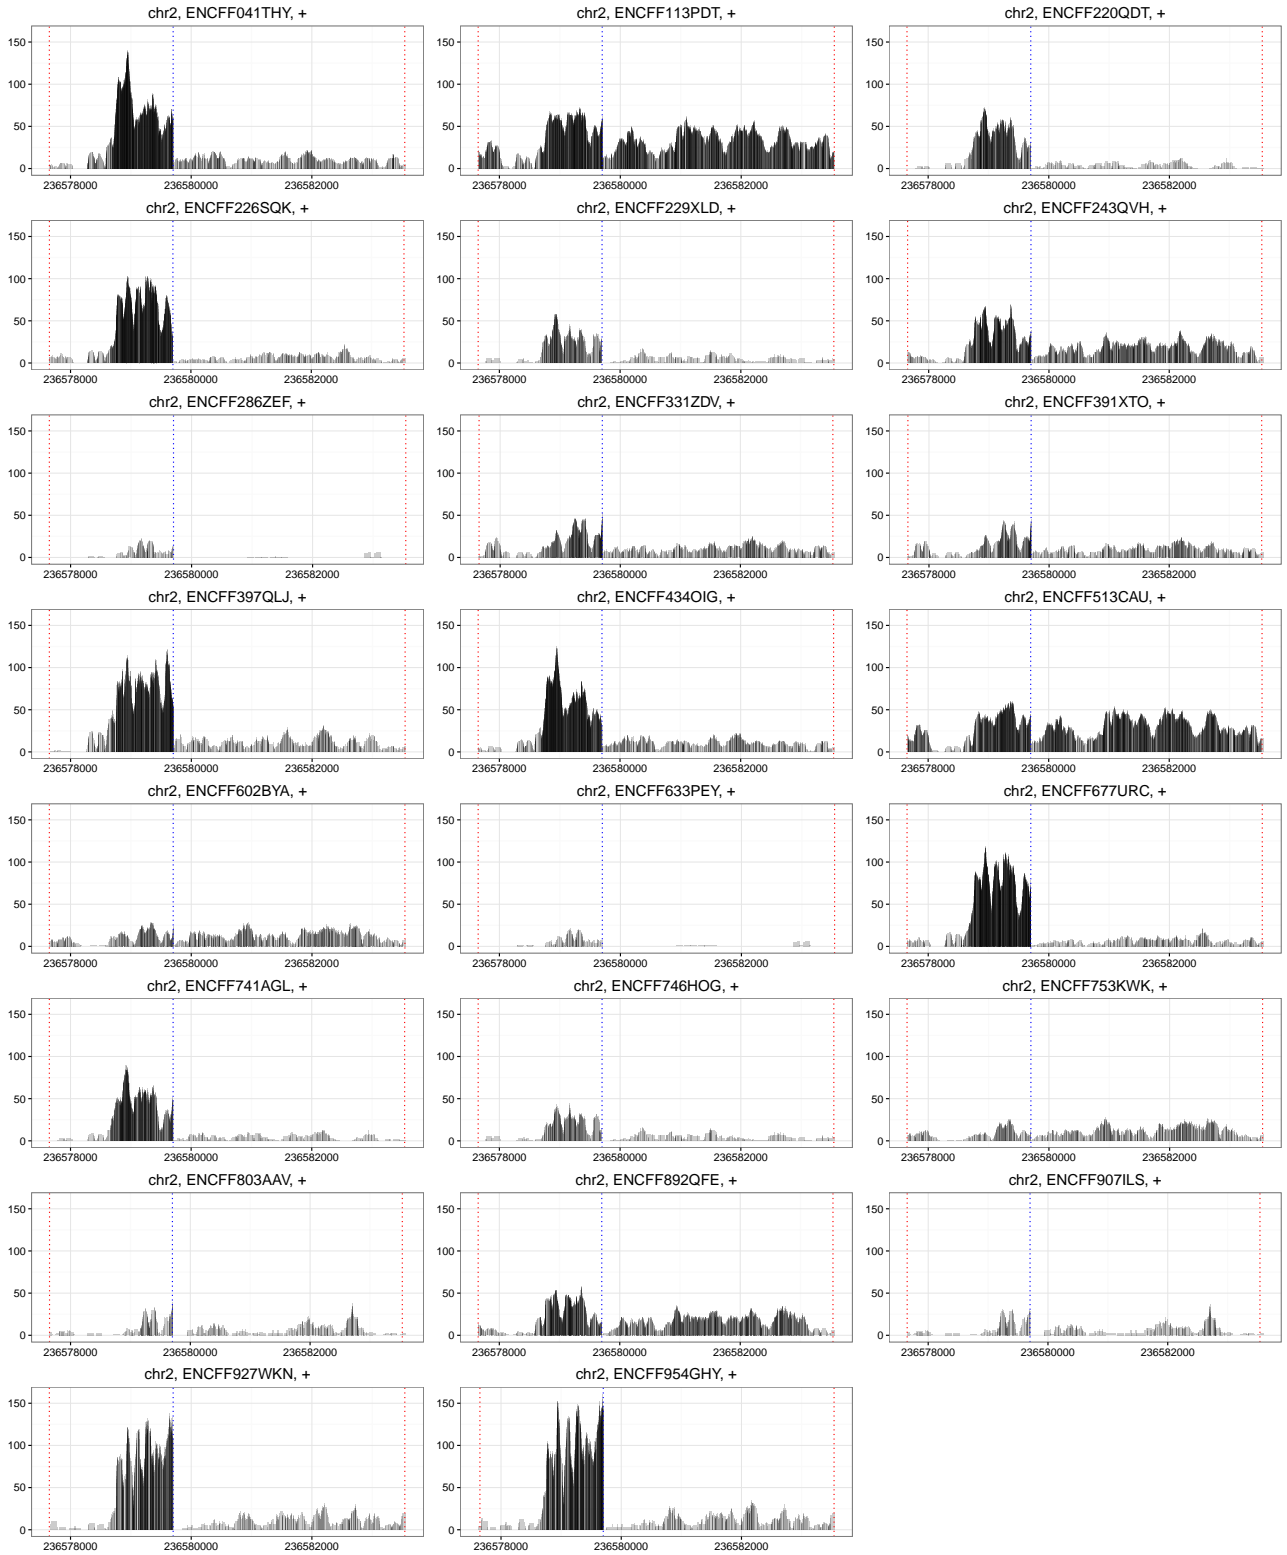

Figure S66: Read coverage in 23 fetal brain BAM files regarding *AGAP1* gene at chr2:236577649-236583540. Red lines define the SRO region, while the blue one pinpoint the splicing site. The title of every subplot provides three information: chromosome location, BAM file name, and gene strand.

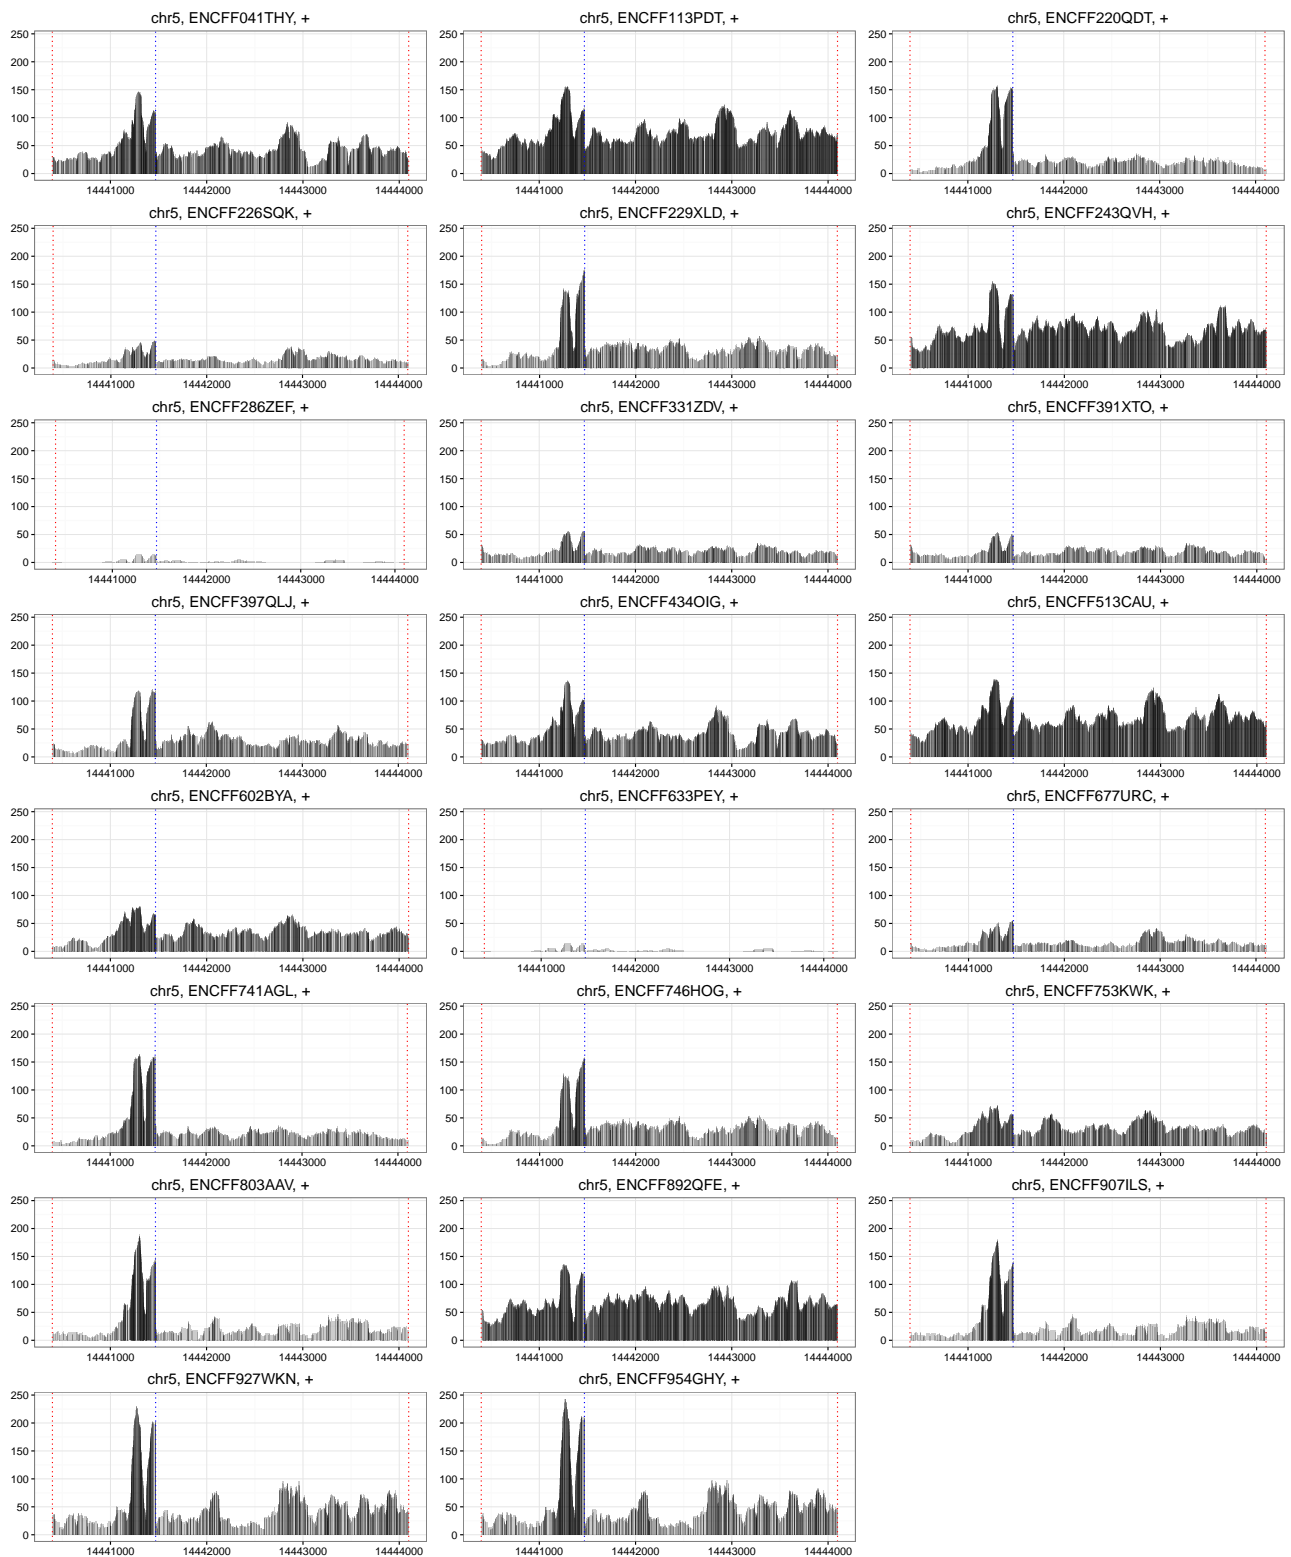

Figure S67: Read coverage in 23 fetal brain BAM files regarding *TRIO* gene at chr5:14440397-14444098. Red lines define the SRO region, while the blue one pinpoint the splicing site. The title of every subplot provides three information: chromosome location, BAM file name, and gene strand.

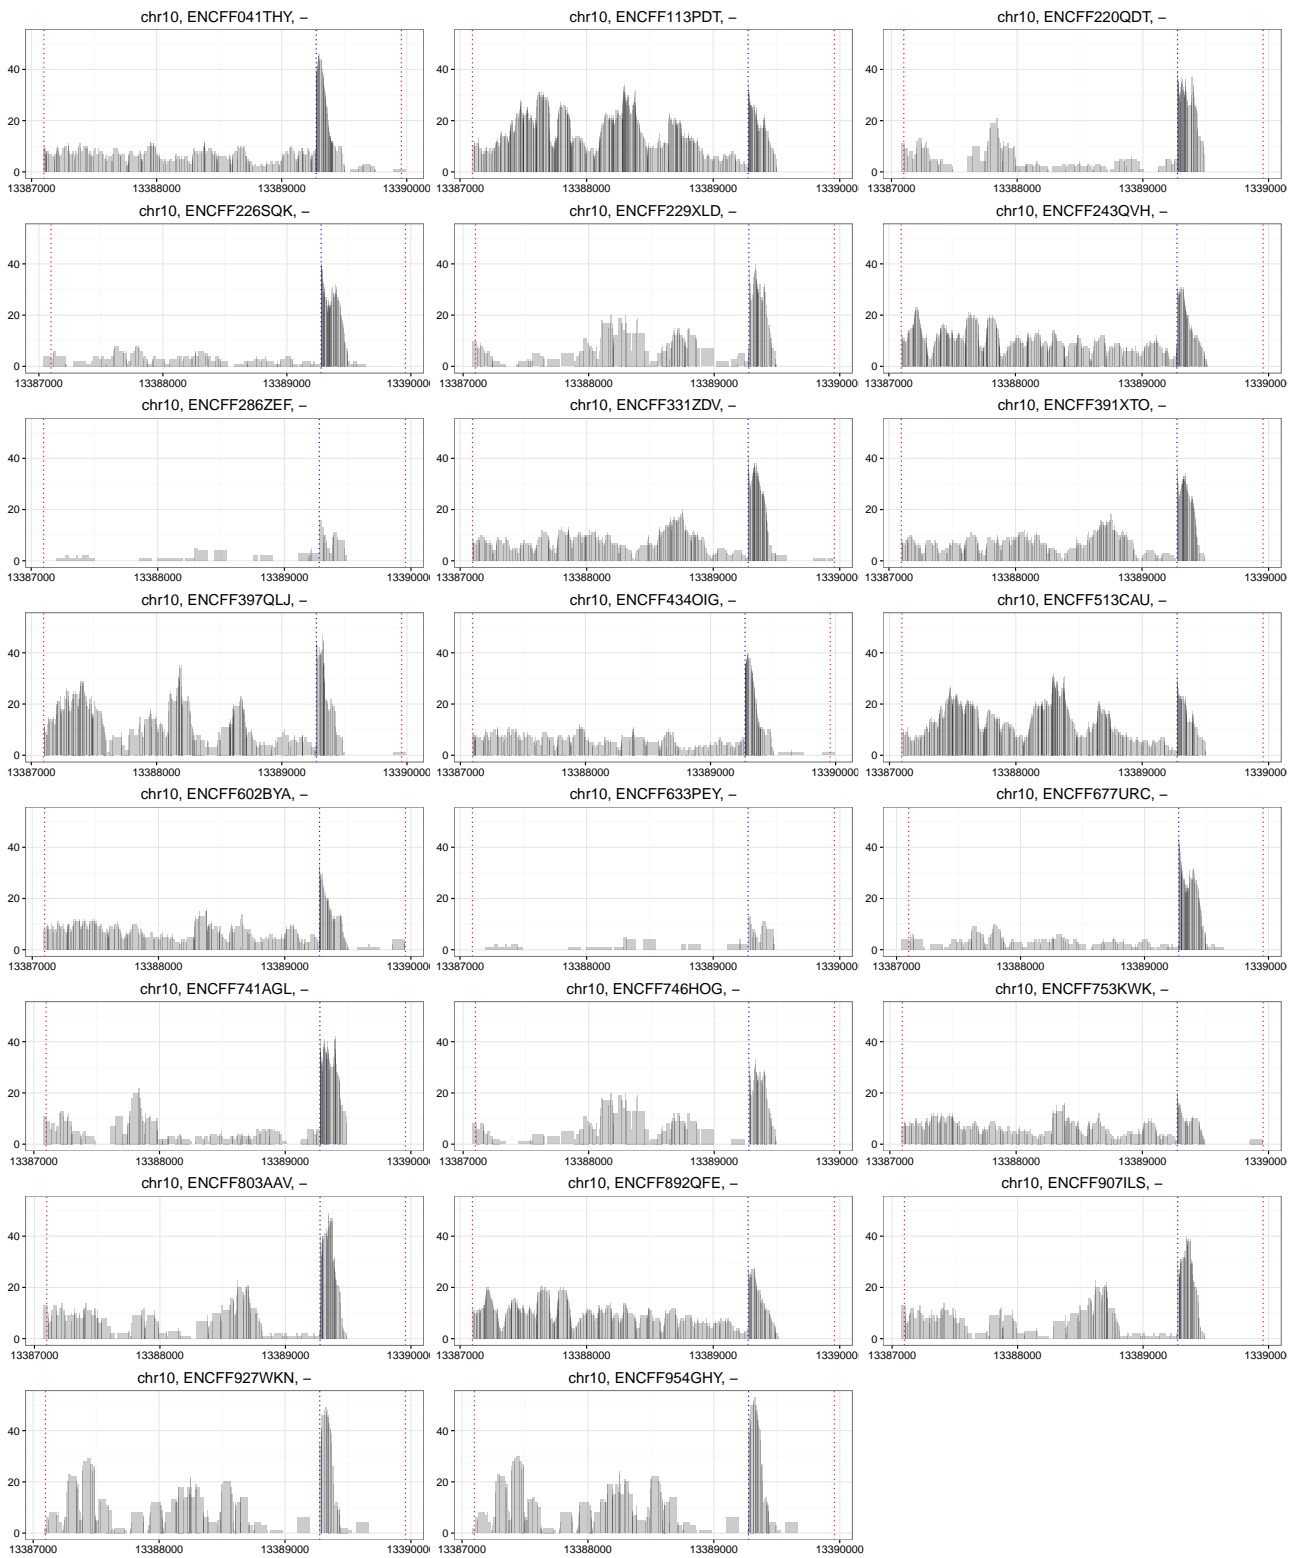

Figure S68: Read coverage in 23 fetal brain BAM files regarding *SEPHS1* gene at chr10:13387098-13389957. Red lines define the SRO region, while the blue one pinpoint the splicing site. The title of every subplot provides three information: chromosome location, BAM file name, and gene strand.

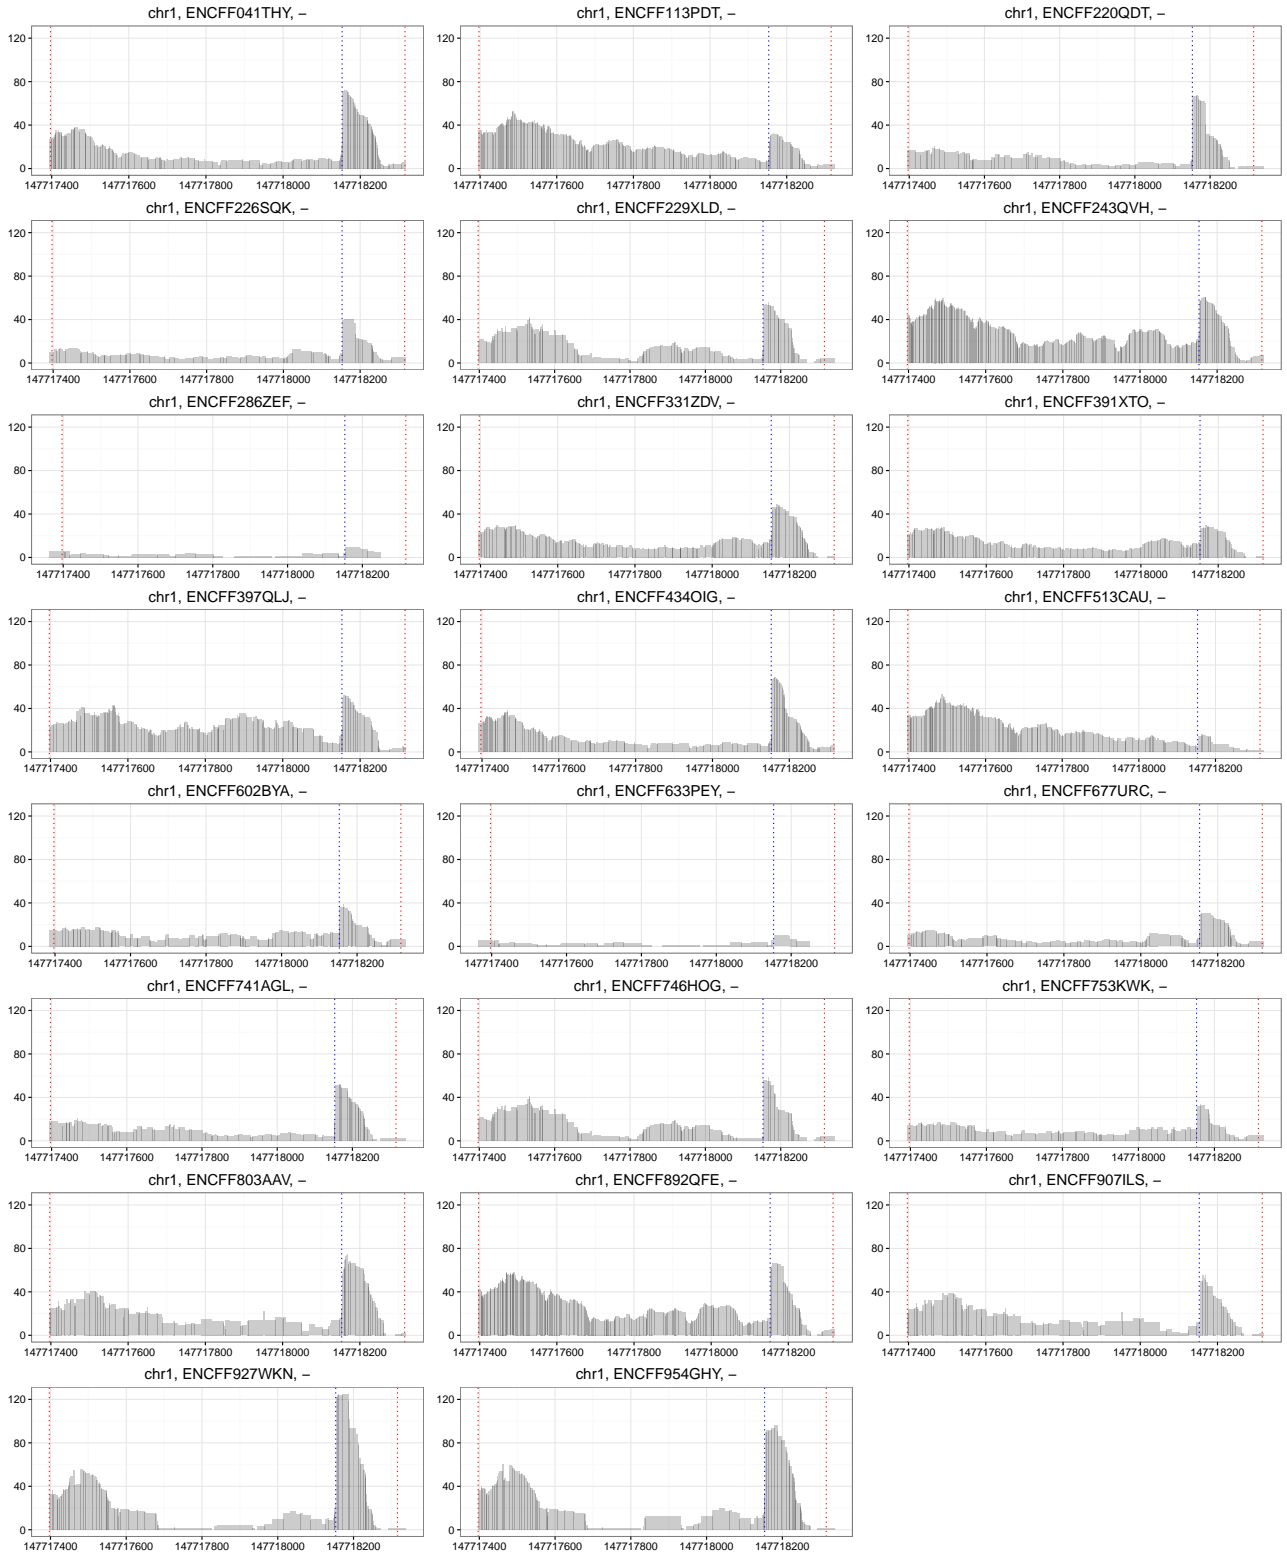

Figure S69: Read coverage in 23 fetal brain BAM files regarding *NBPF8* gene at chr1:147717397-147718316. Red lines define the SRO region, while the blue one pinpoint the splicing site. The title of every subplot provides three information: chromosome location, BAM file name, and gene strand.

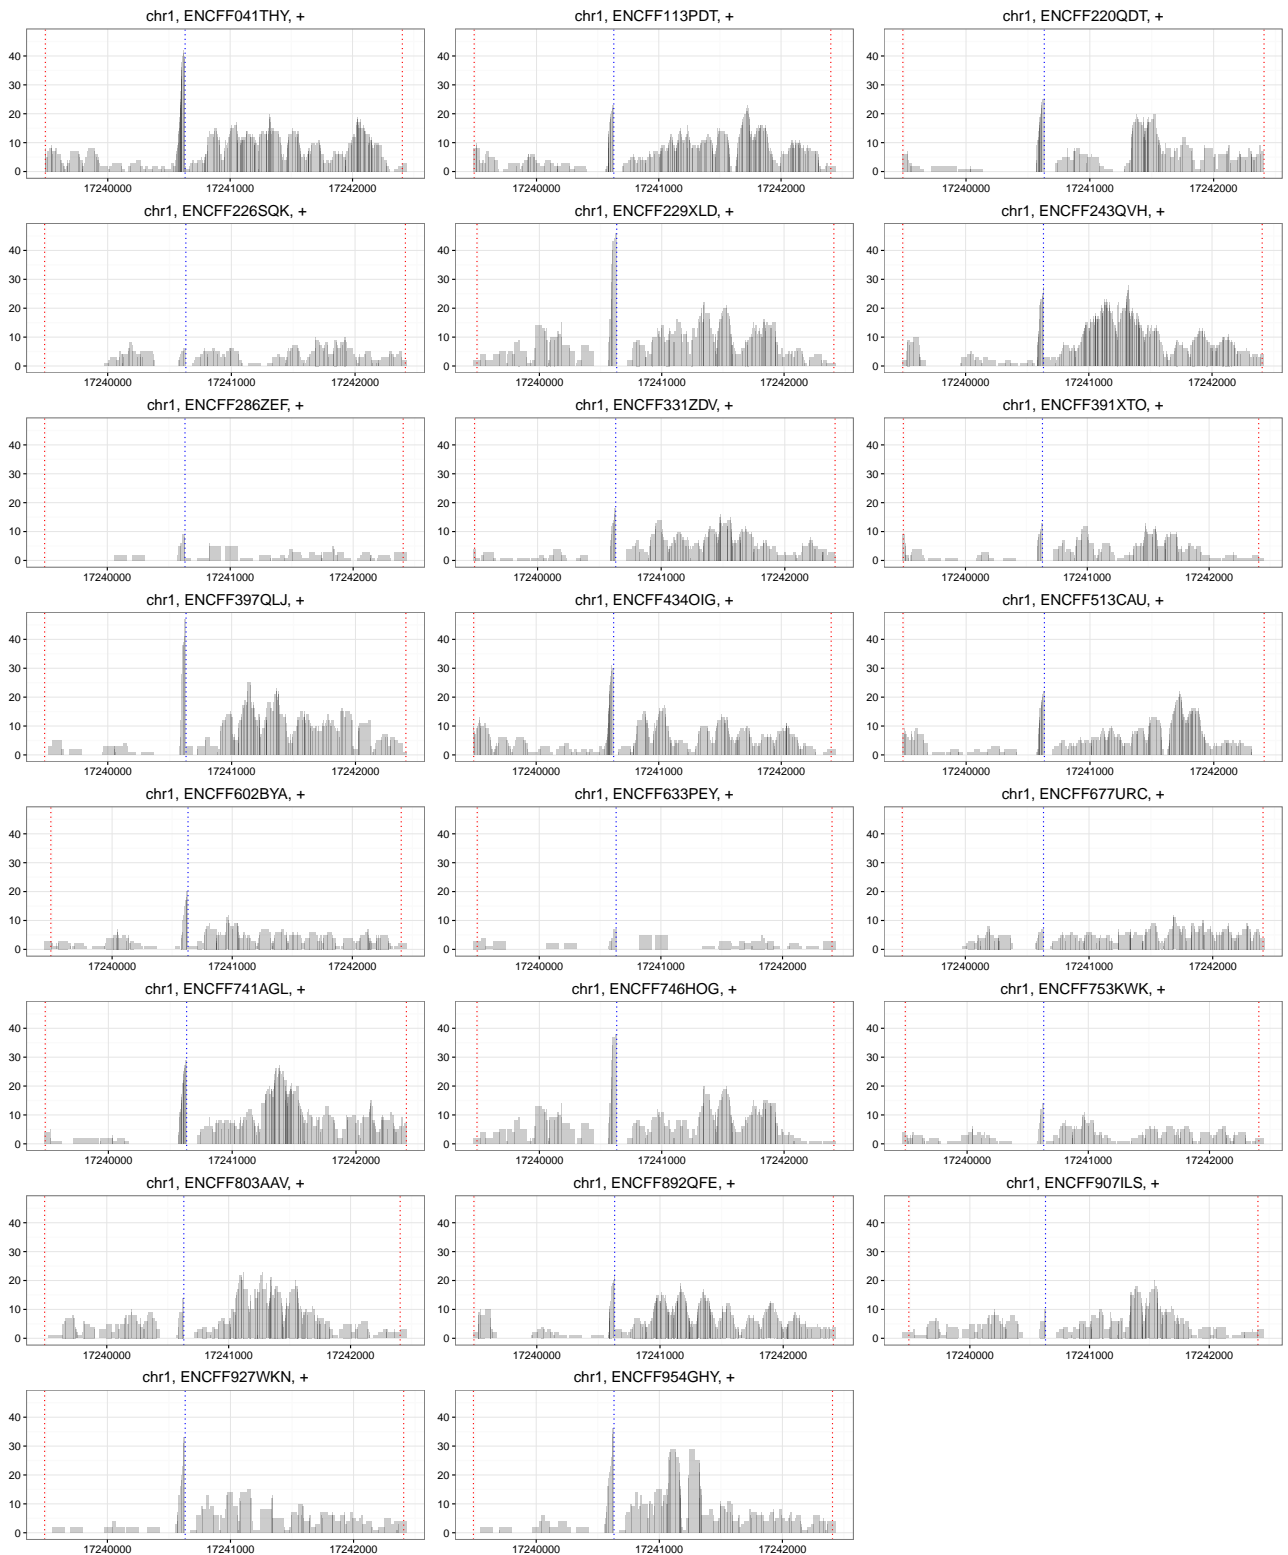

Figure S70: Read coverage in 23 fetal brain BAM files regarding *CROCC* gene at chr1:17239490-17242407. Red lines define the SRO region, while the blue one pinpoint the splicing site. The title of every subplot provides three information: chromosome location, BAM file name, and gene strand.



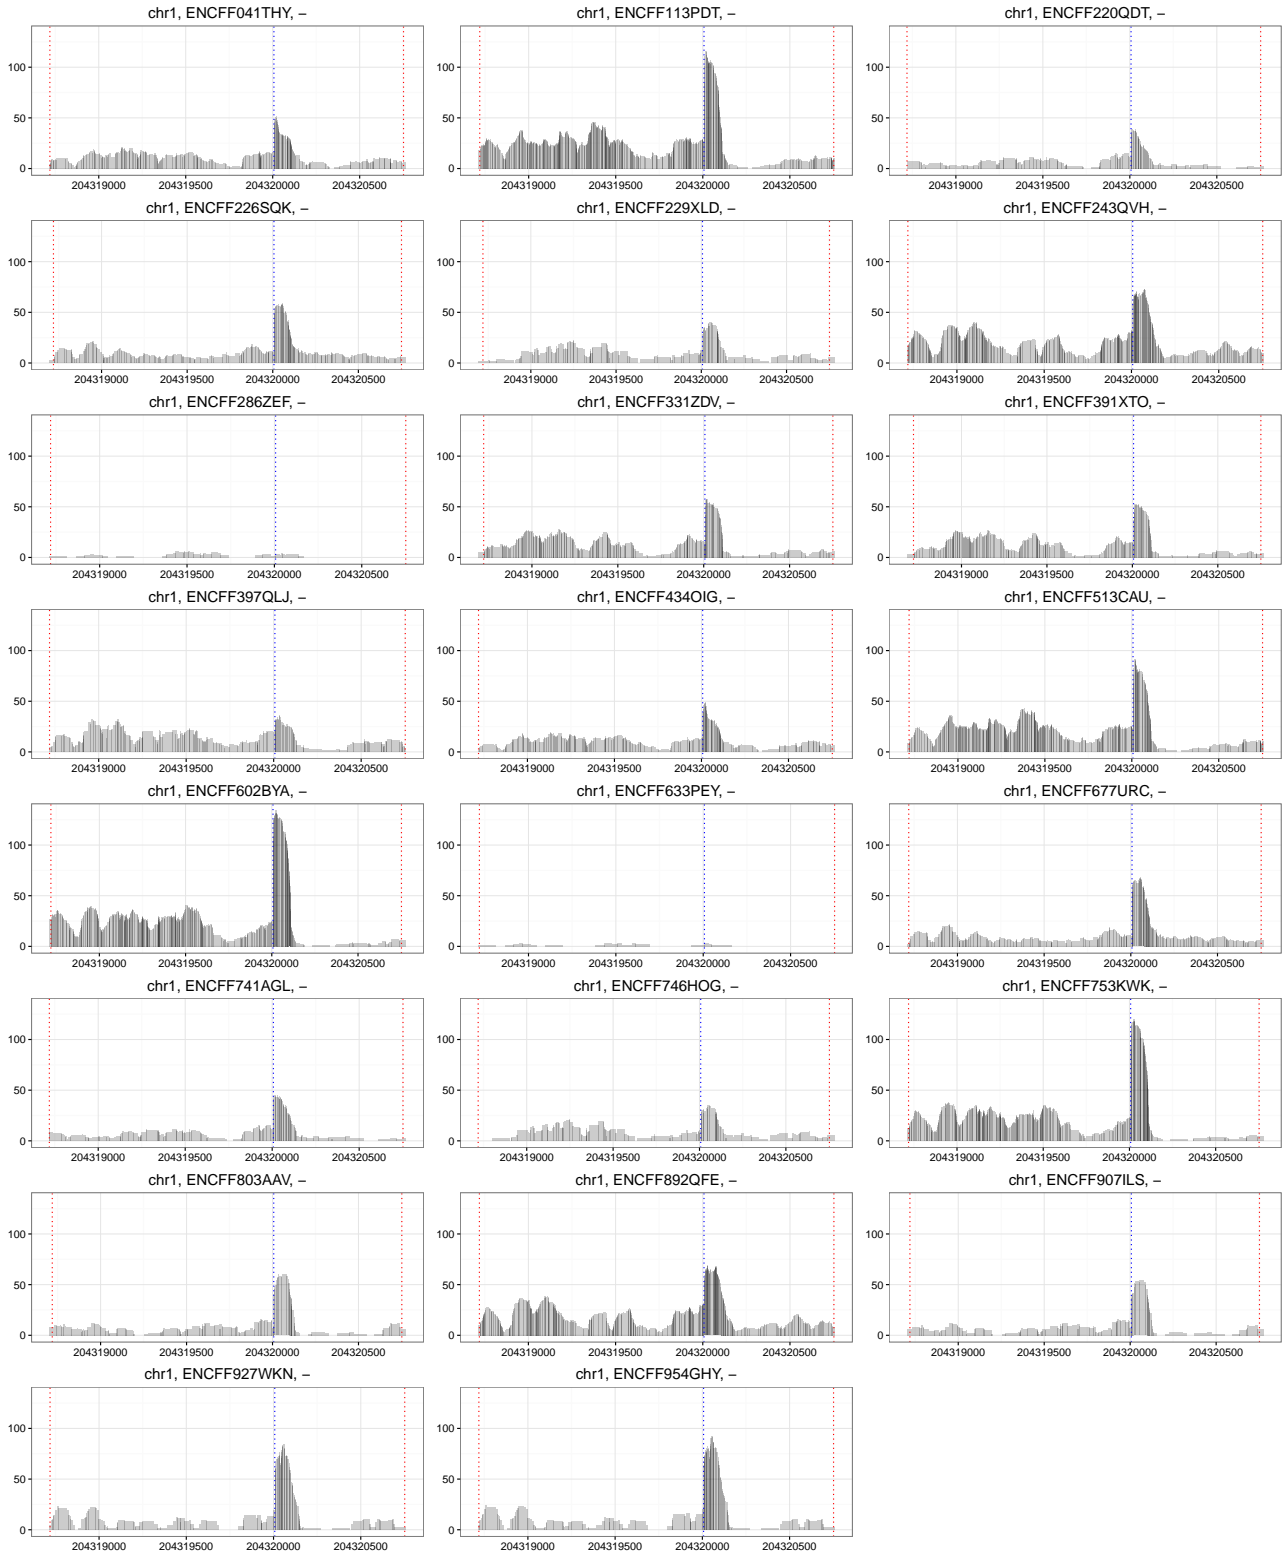

Figure S71: Read coverage in 23 fetal brain BAM files regarding *PLEKHA6* gene at chr1:204318719-204320752. Red lines define the SRO region, while the blue one pinpoint the splicing site. The title of every subplot provides three information: chromosome location, BAM file name, and gene strand.

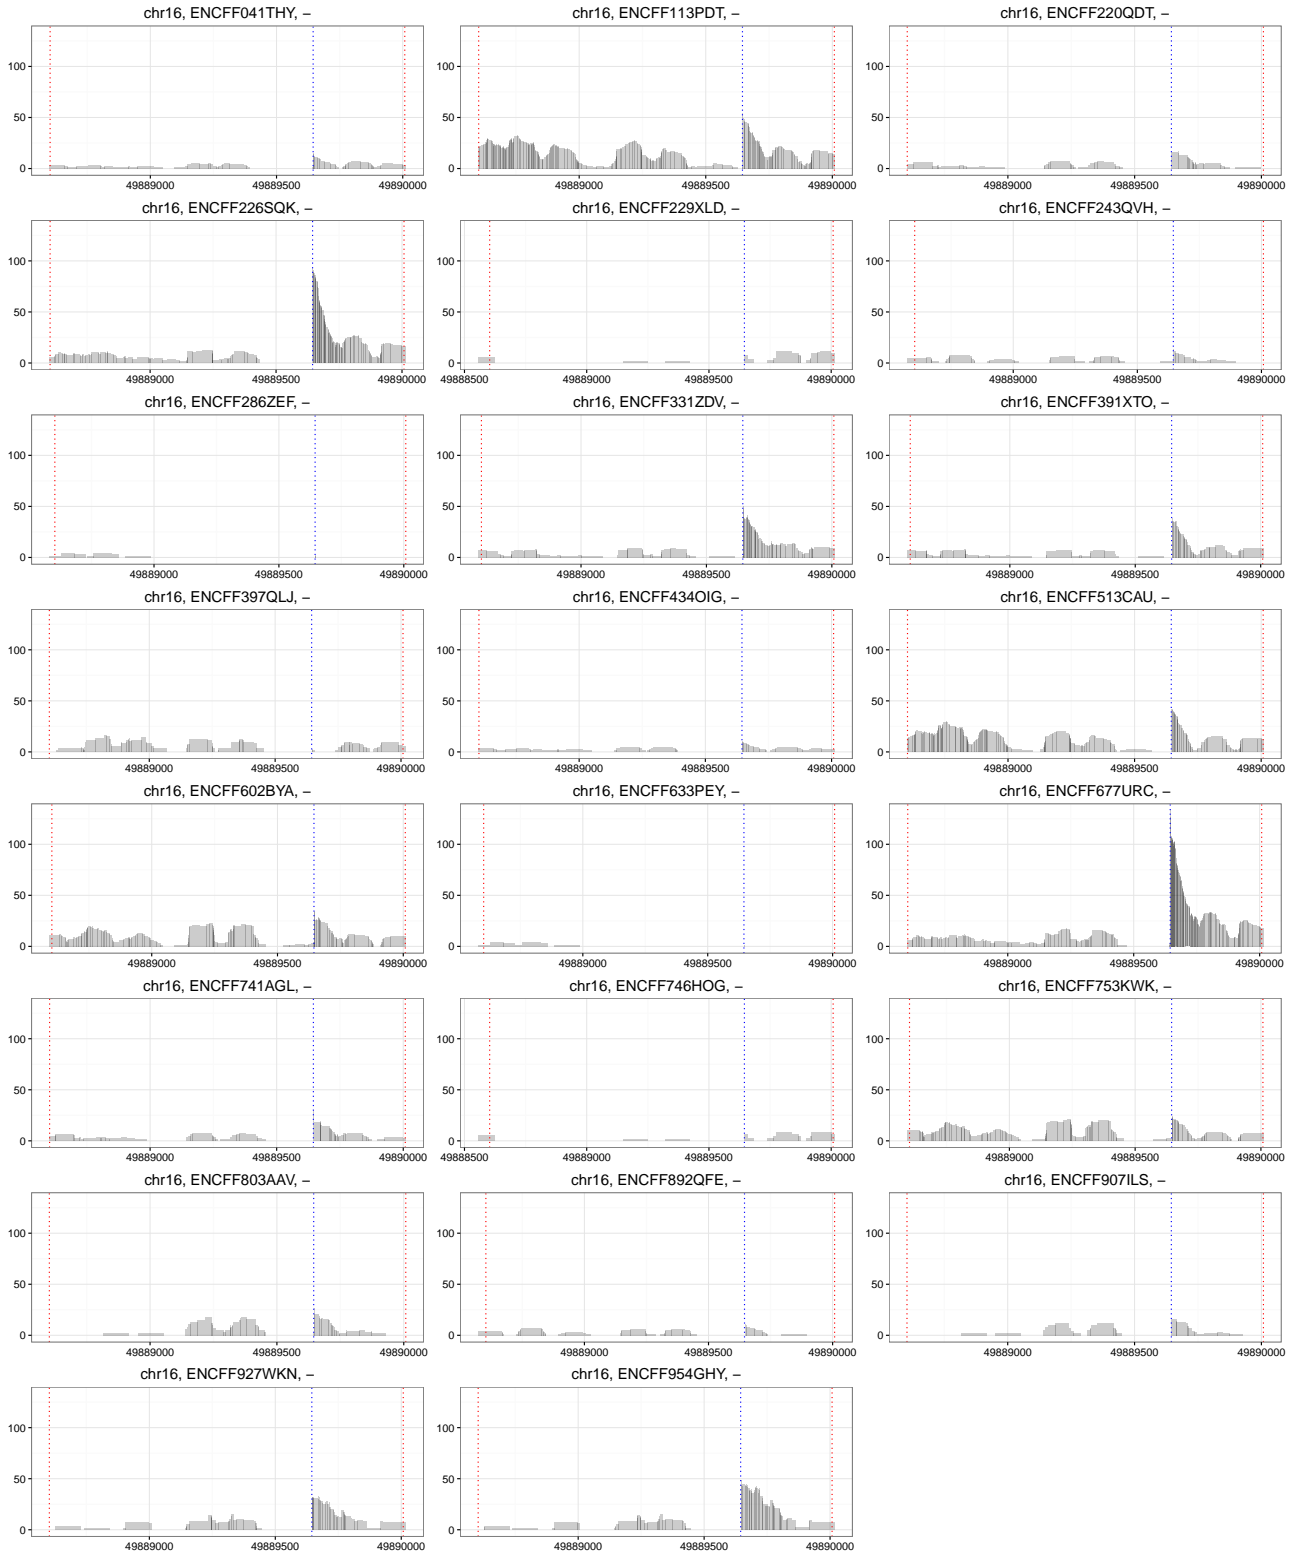

Figure S72: Read coverage in 23 fetal brain BAM files regarding *ZNF423* gene at chr16:49888603-49890008. Red lines define the SRO region, while the blue one pinpoint the splicing site. The title of every subplot provides three information: chromosome location, BAM file name, and gene strand.

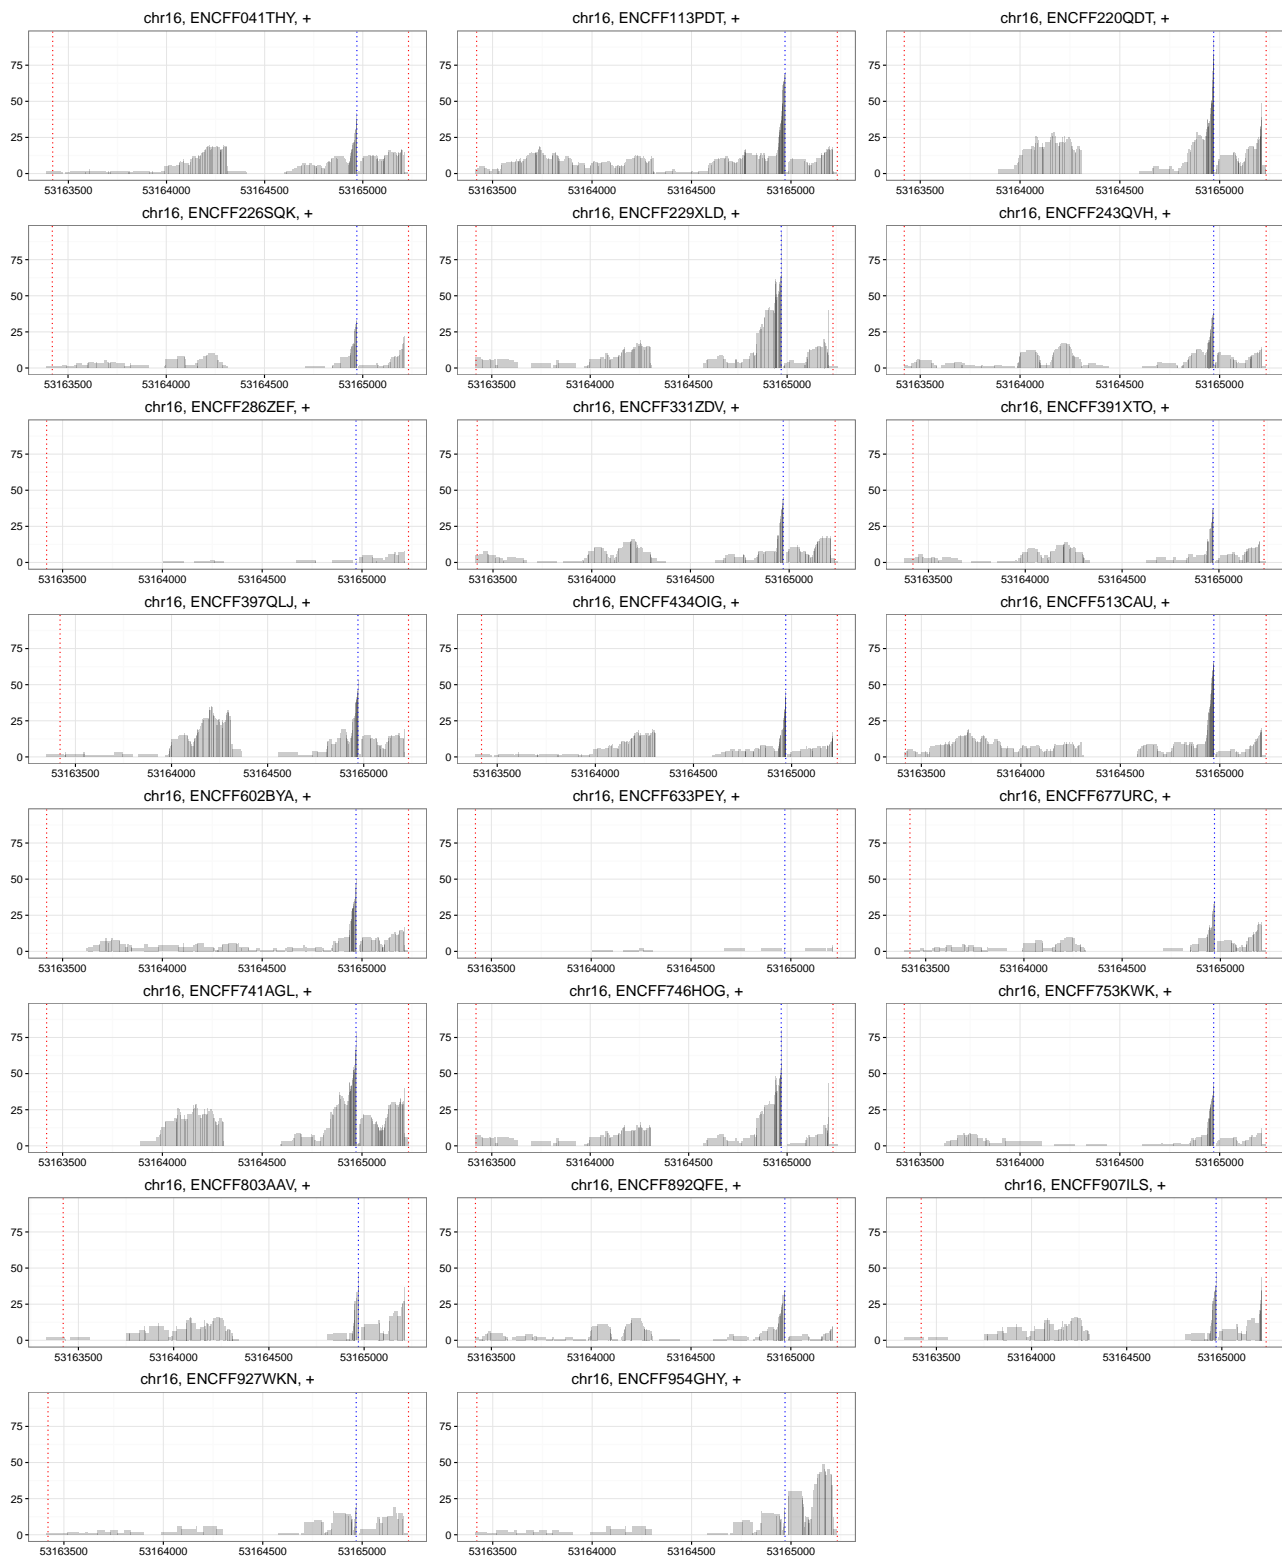

Figure S73: Read coverage in 23 fetal brain BAM files regarding *CHD9* gene at chr16:53163420-53165233. Red lines define the SRO region, while the blue one pinpoint the splicing site. The title of every subplot provides three information: chromosome location, BAM file name, and gene strand.

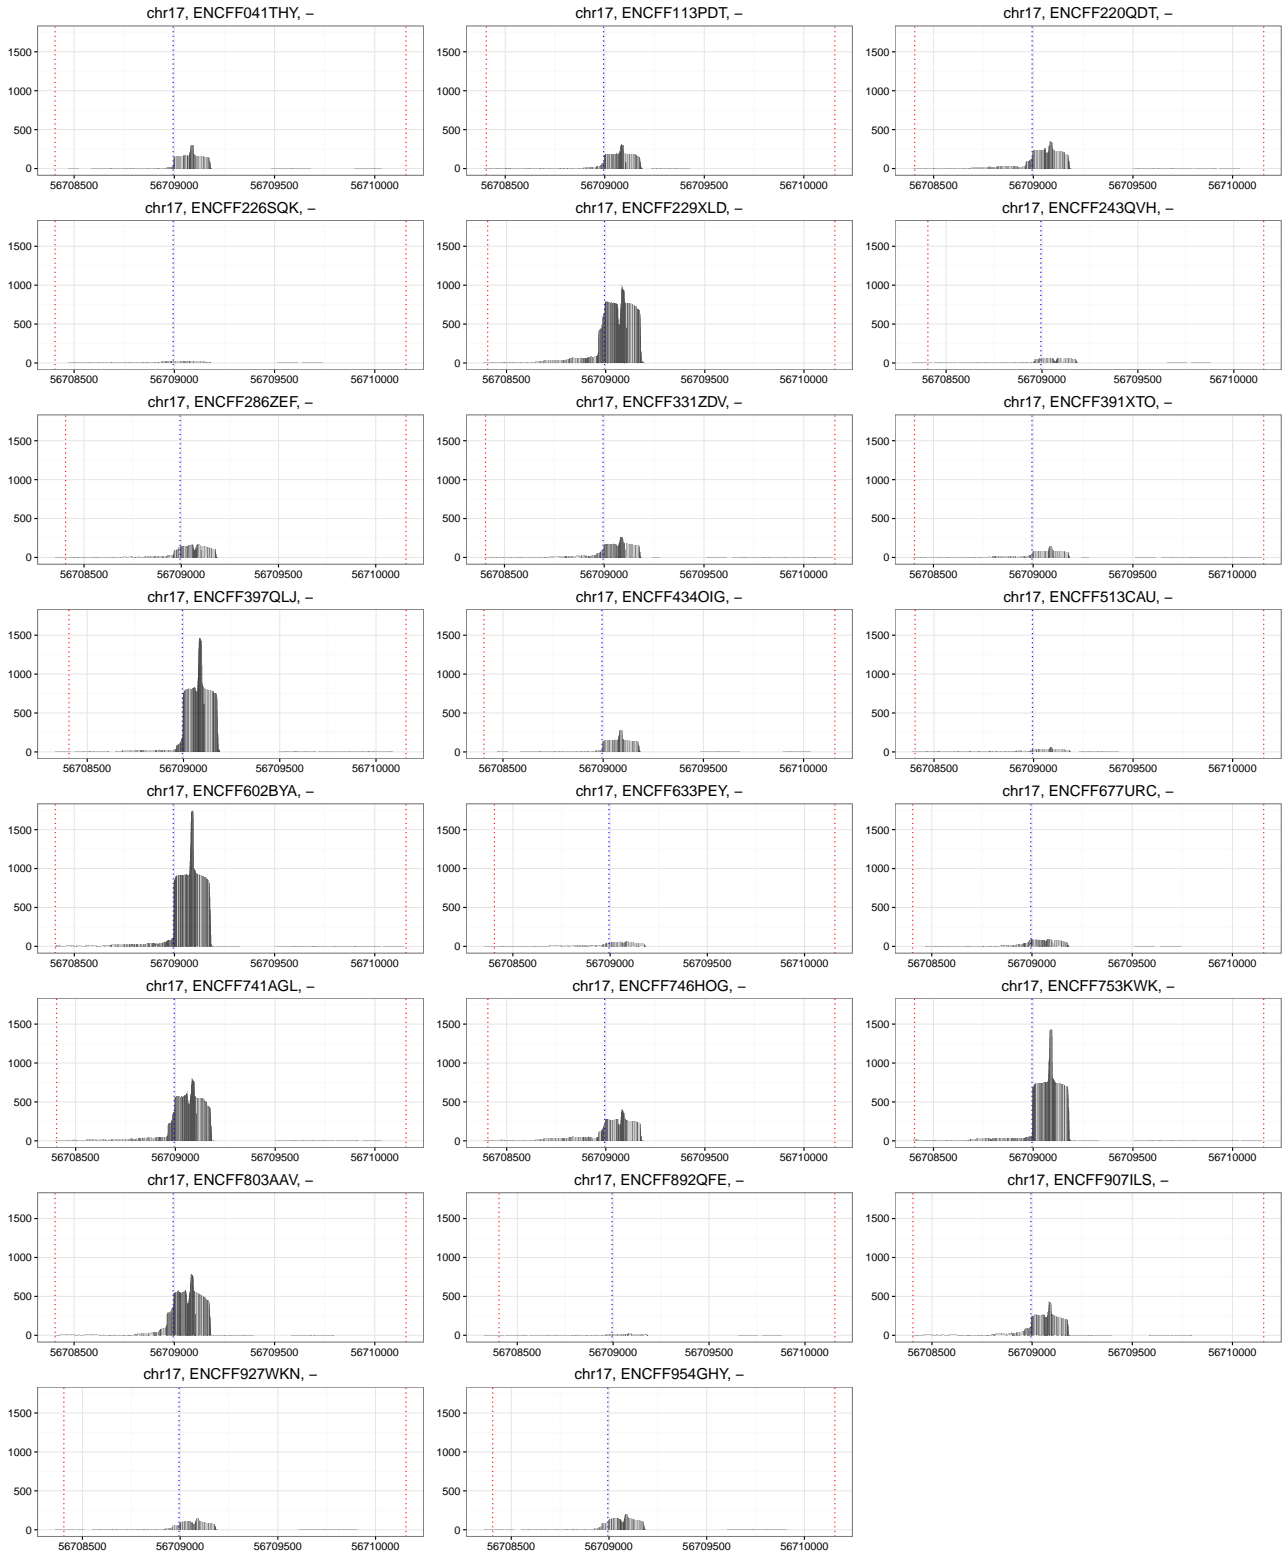

Figure S74: Read coverage in 23 fetal brain BAM files regarding *TEX14* gene at chr17:56708405-56710156. Red lines define the SRO region, while the blue one pinpoint the splicing site. The title of every subplot provides three information: chromosome location, BAM file name, and gene strand.

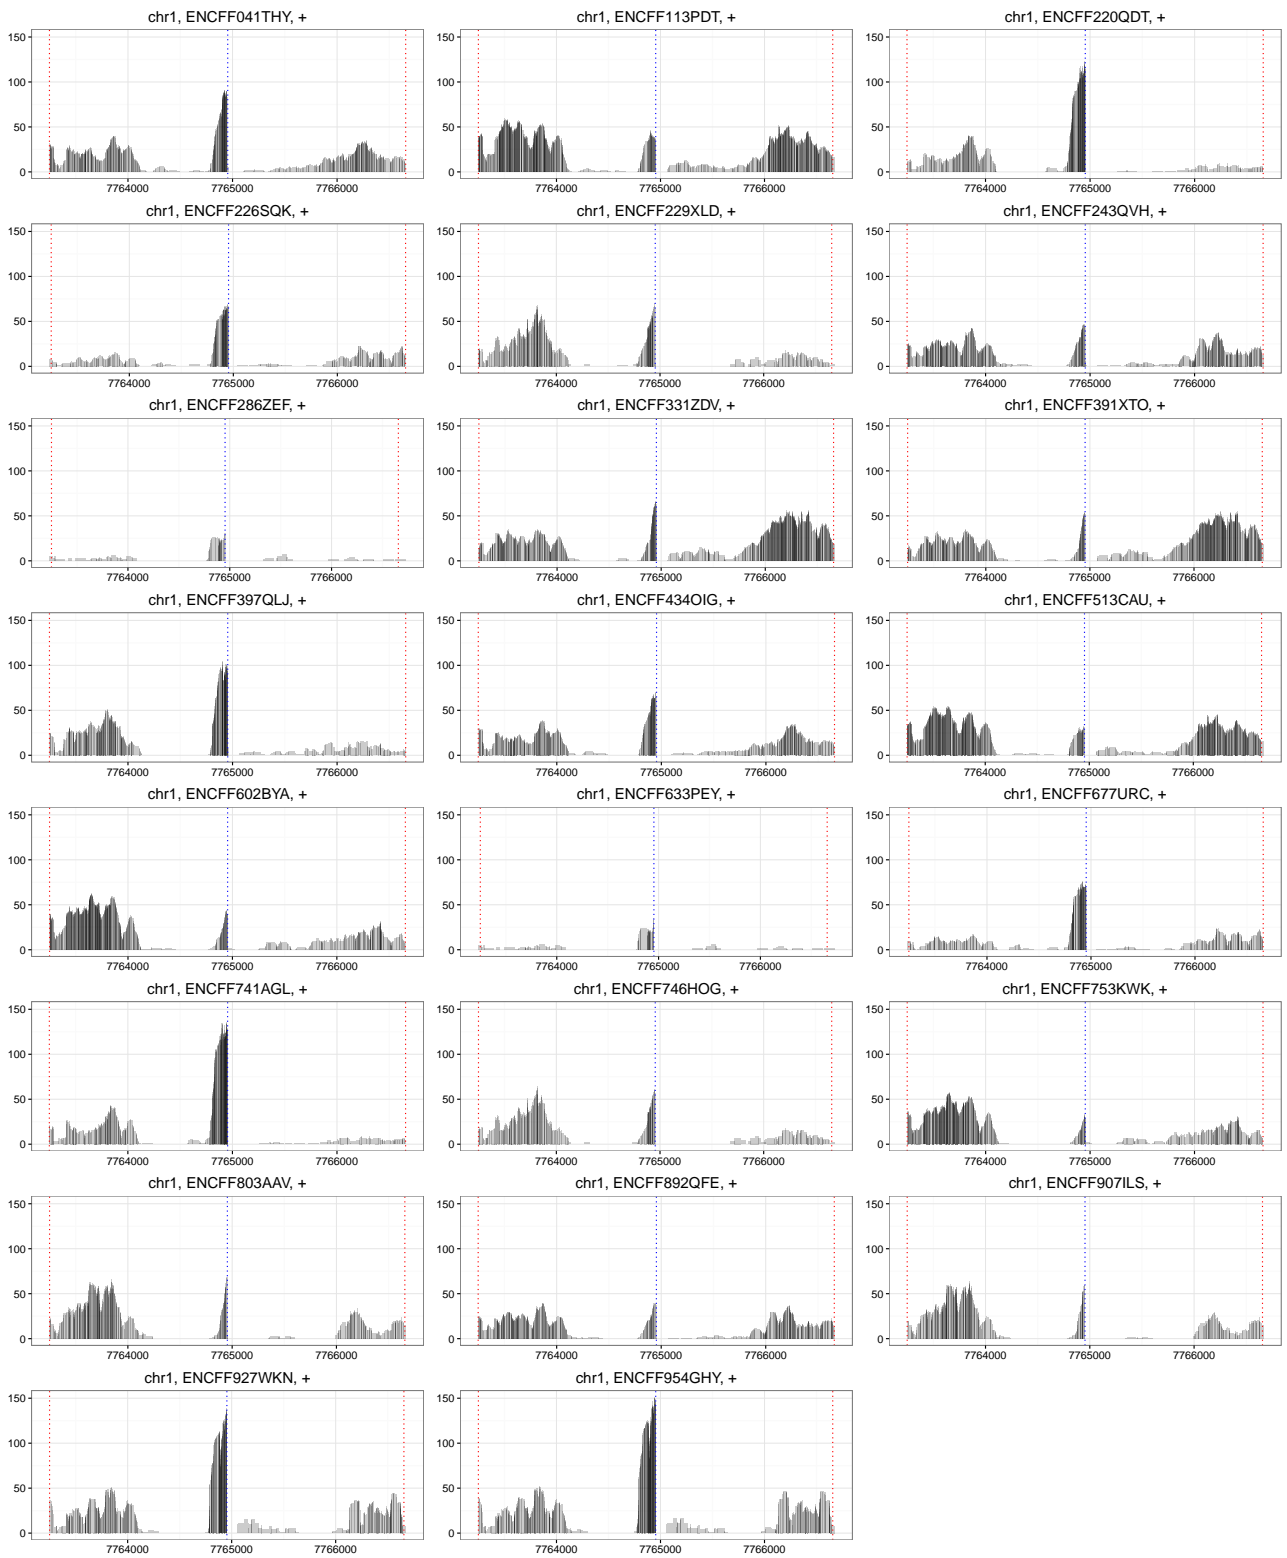

Figure S75: Read coverage in 23 fetal brain BAM files regarding *CAMTA1* gene at chr1:7763249-7766656. Red lines define the SRO region, while the blue one pinpoint the splicing site. The title of every subplot provides three information: chromosome location, BAM file name, and gene strand.

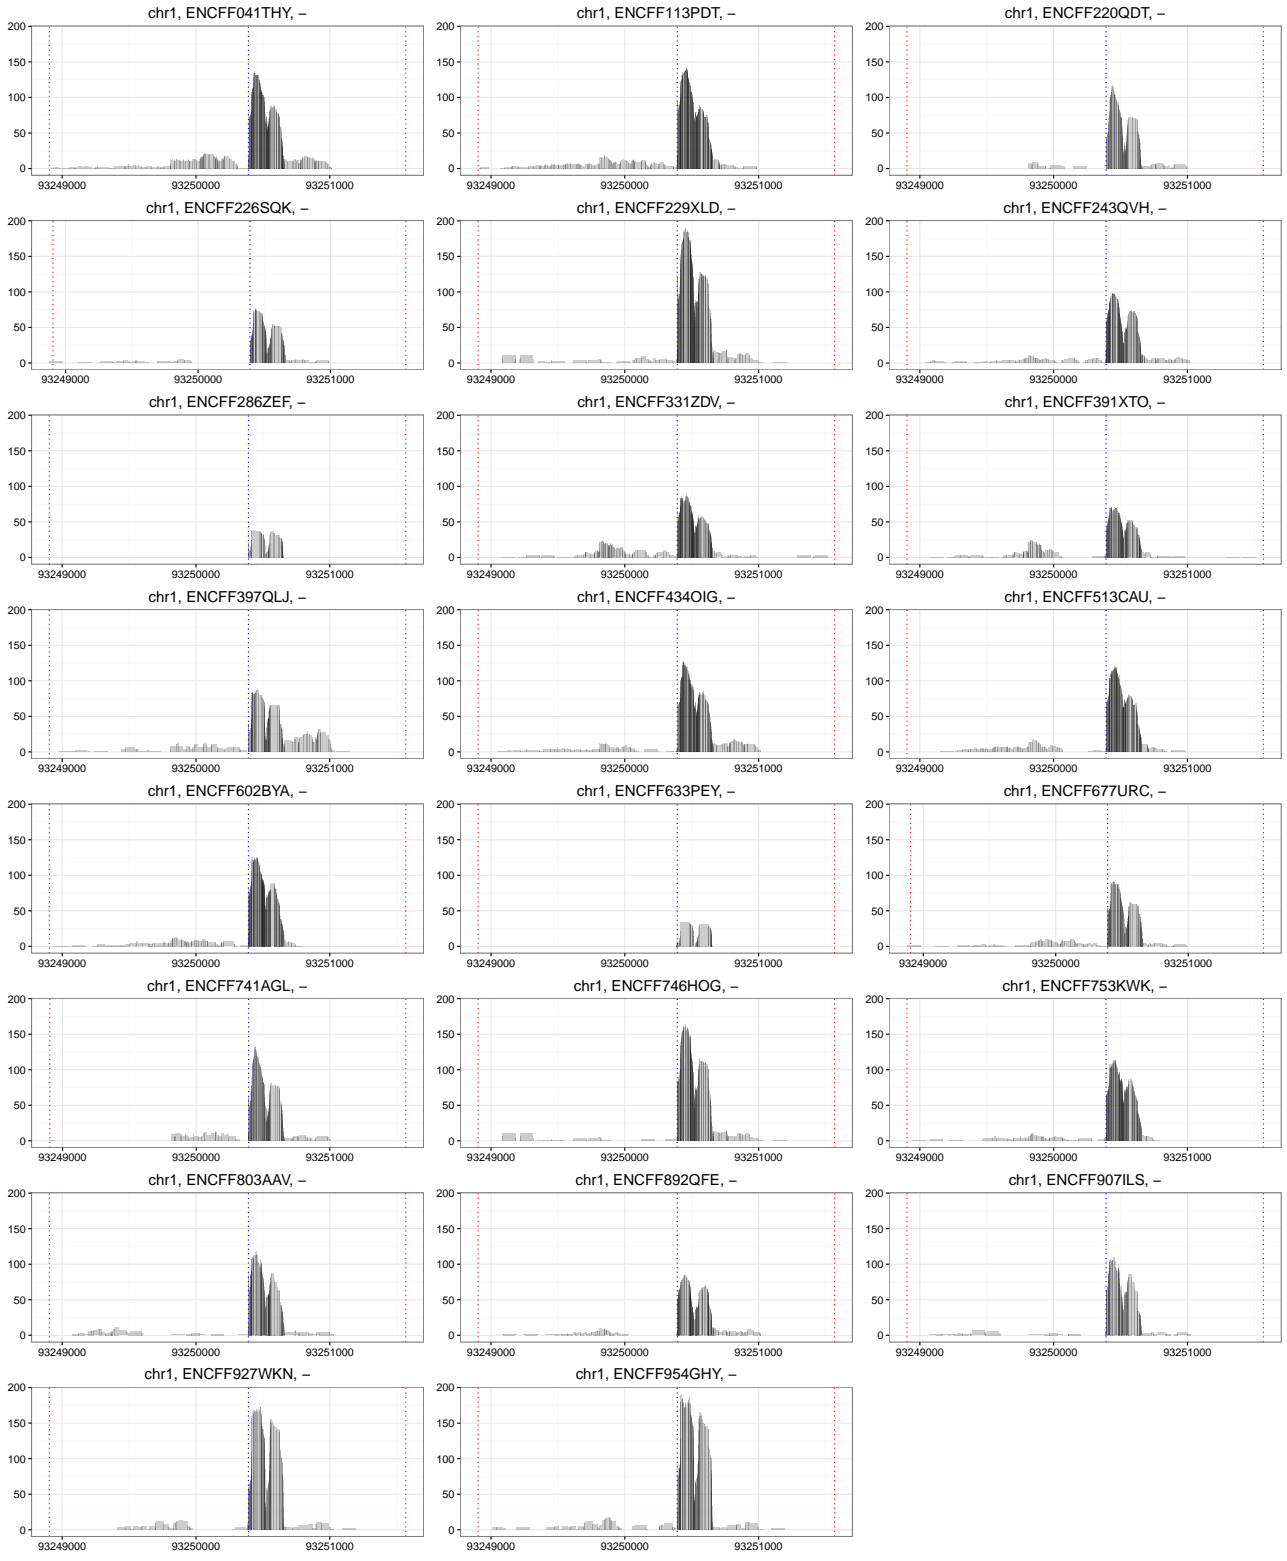

Figure S76: Read coverage in 23 fetal brain BAM files regarding *EVI5* gene at chr1:93248904-93251568. Red lines define the SRO region, while the blue one pinpoint the splicing site. The title of every subplot provides three information: chromosome location, BAM file name, and gene strand.

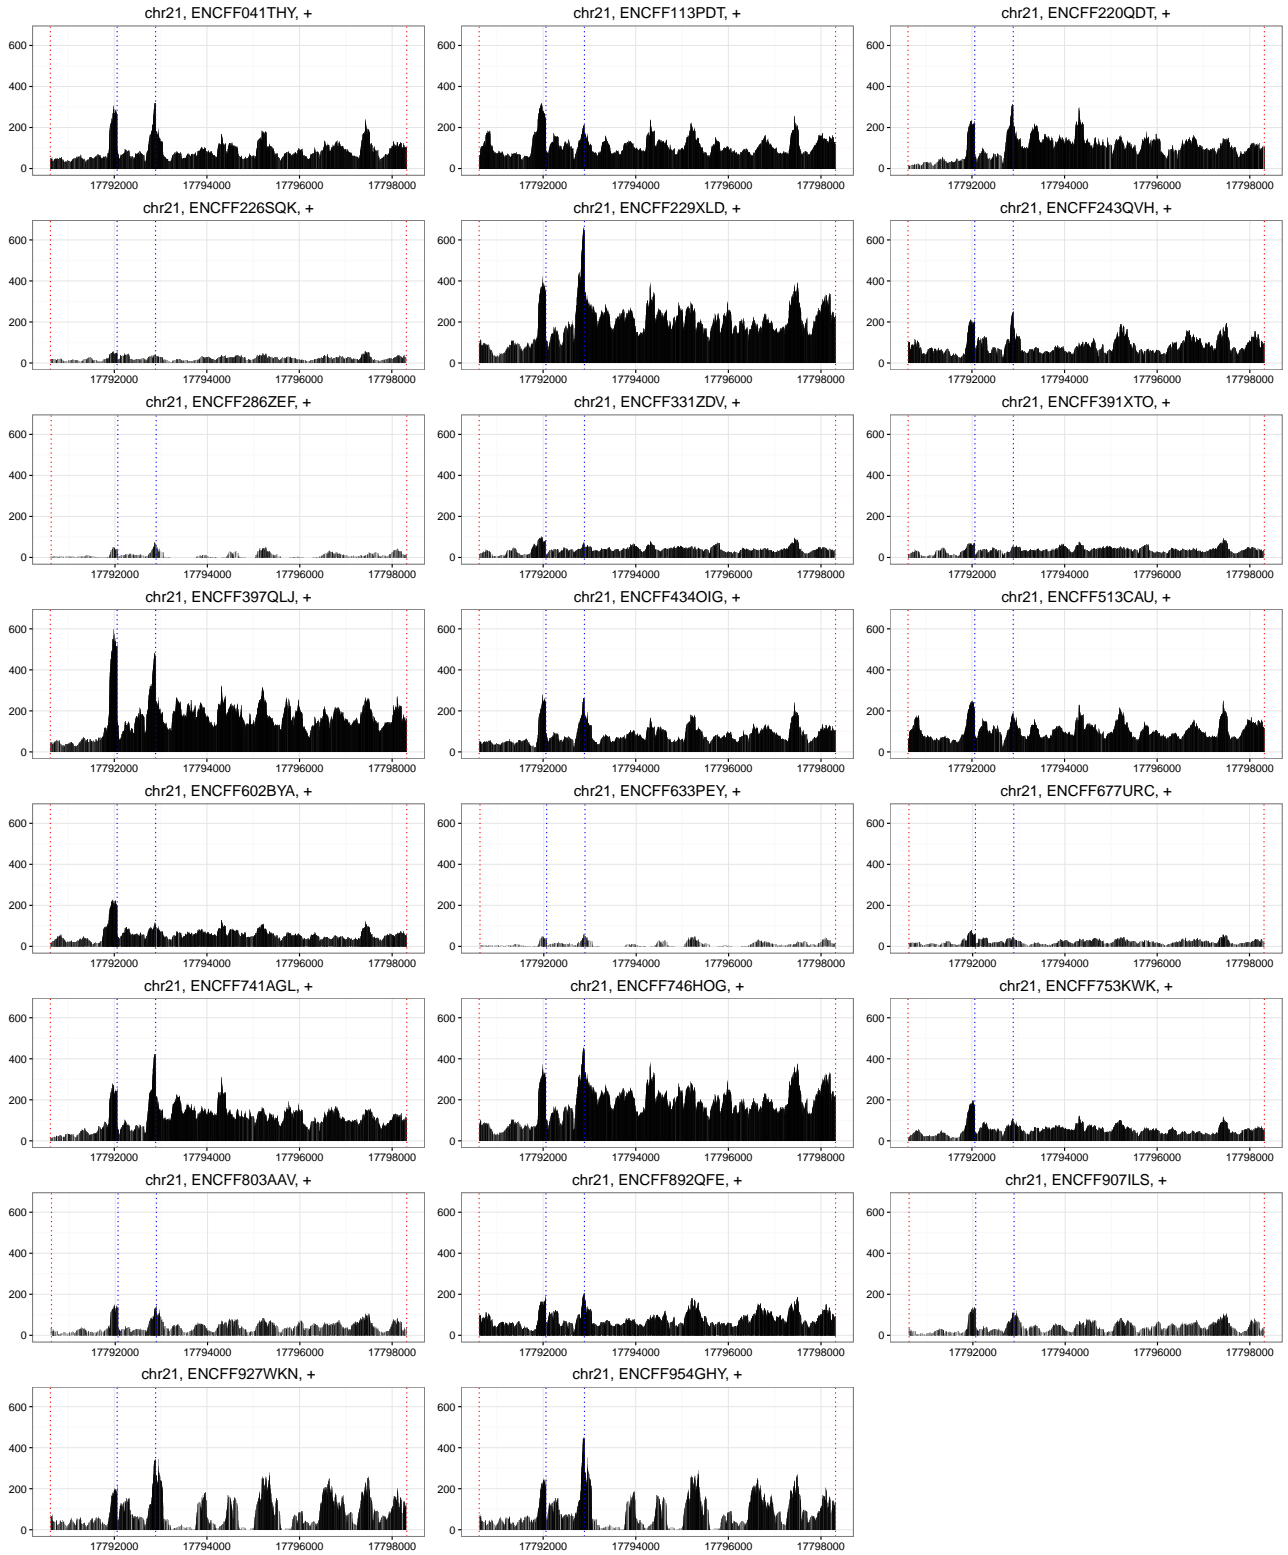

Figure S77: Read coverage in 23 fetal brain BAM files regarding *LINC00478* gene at chr21:17790619-17798315. Red lines define the SRO region, while the blue one pinpoint the splicing site. The title of every subplot provides three information: chromosome location, BAM file name, and gene strand.

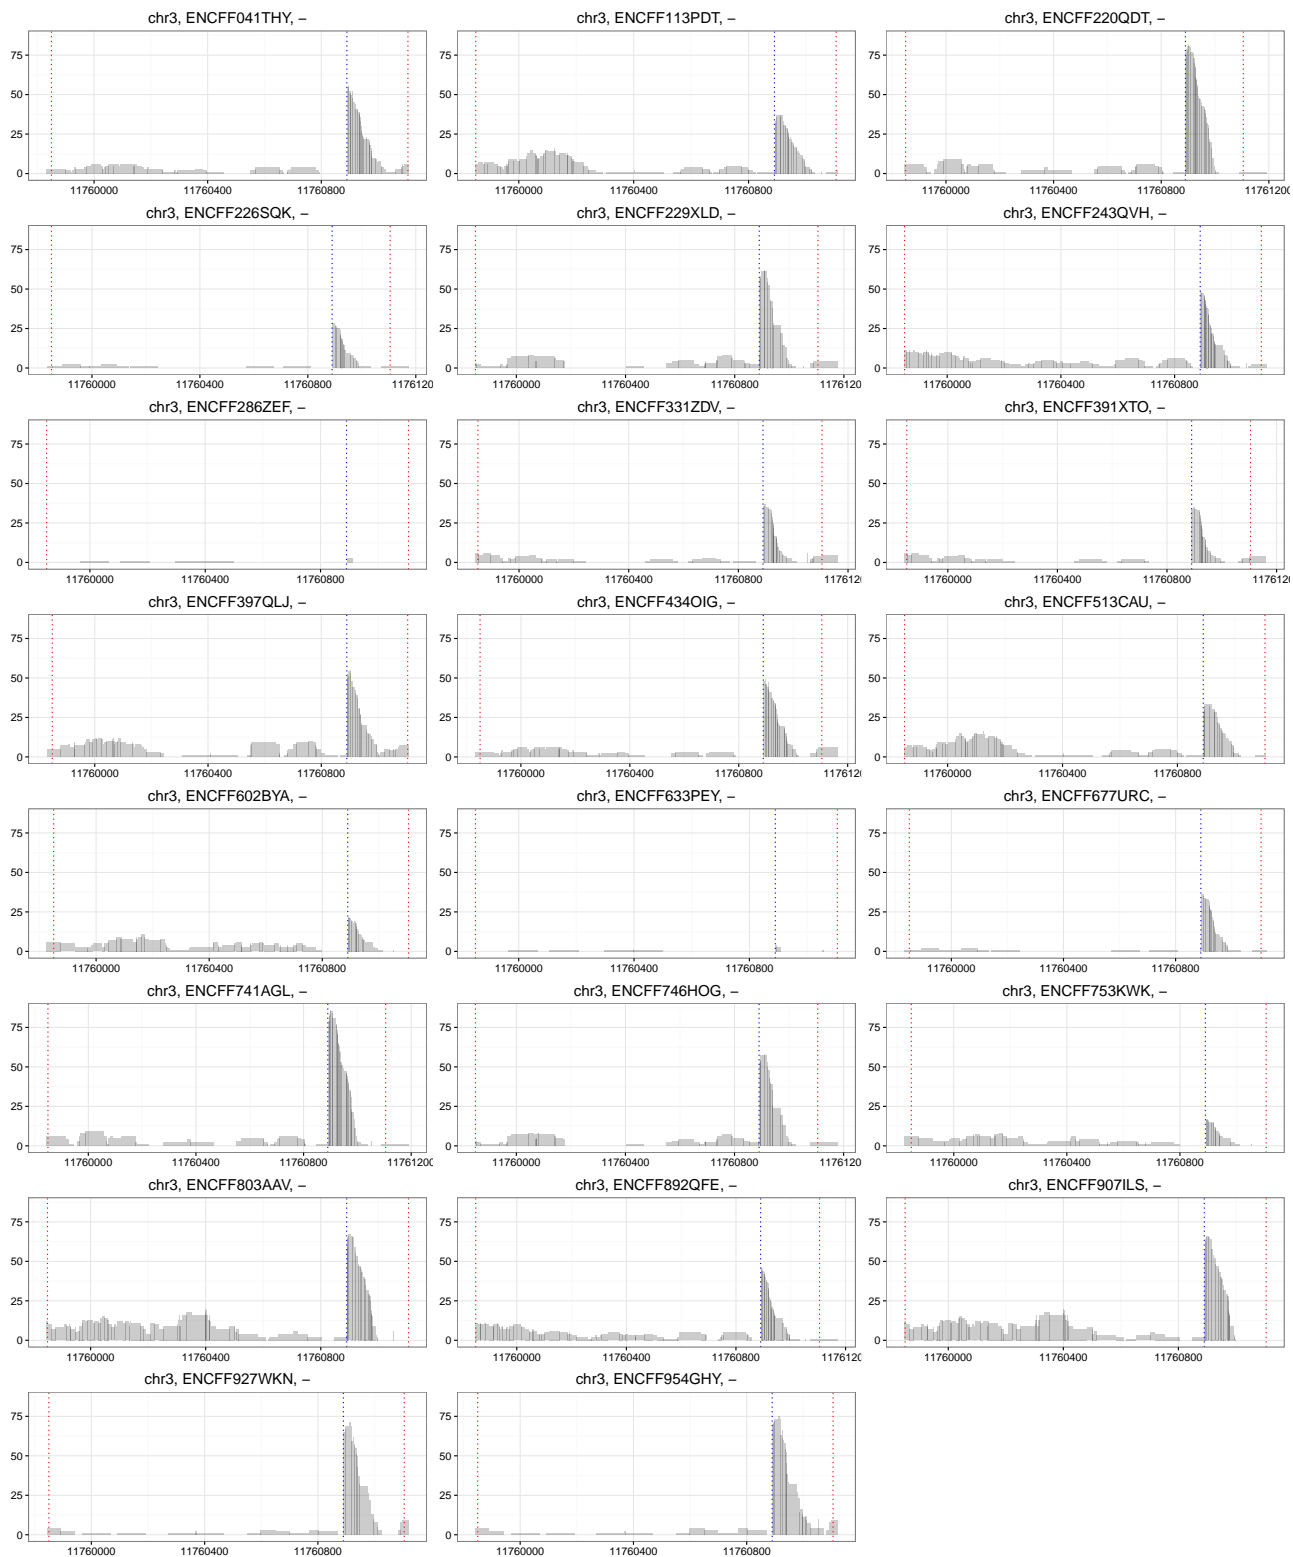

Figure S78: Read coverage in 23 fetal brain BAM files regarding *VGLL4* gene at chr3:11759850-11761105. Red lines define the SRO region, while the blue one pinpoint the splicing site. The title of every subplot provides three information: chromosome location, BAM file name, and gene strand.



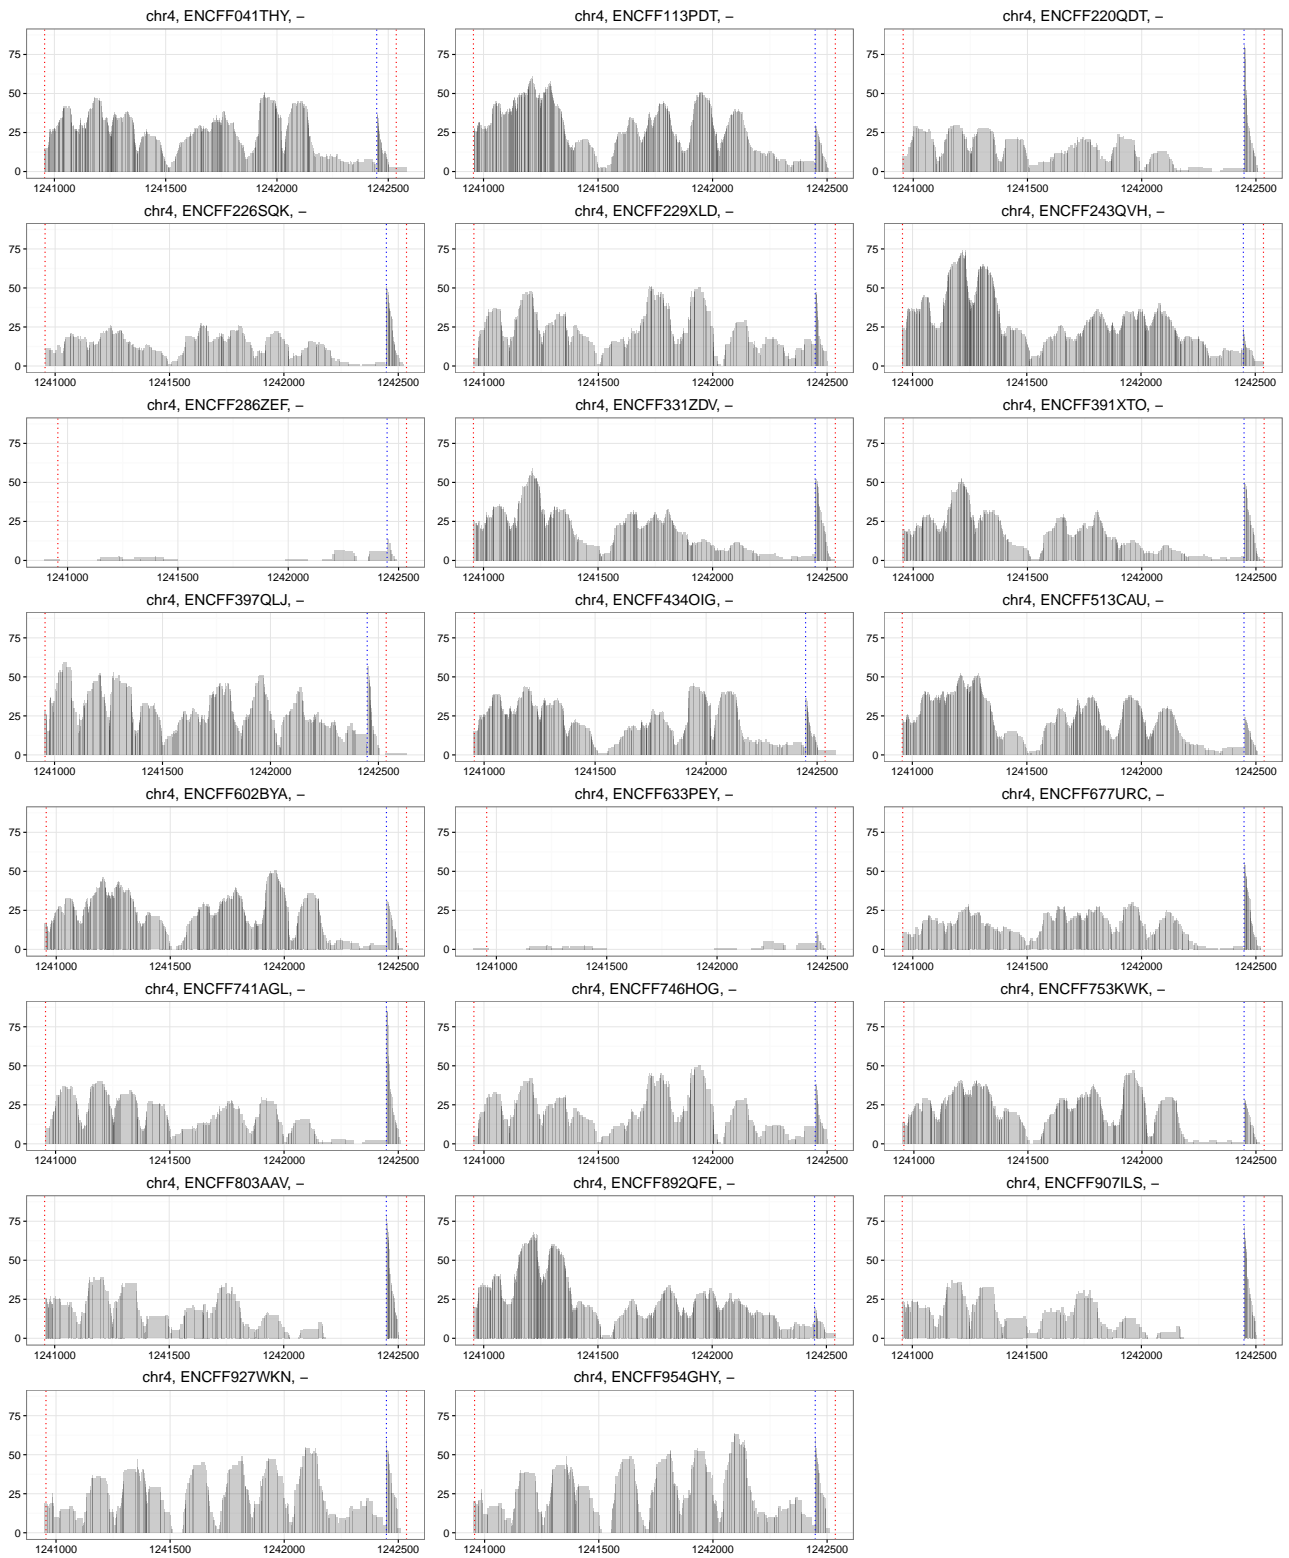

Figure S79: Read coverage in 23 fetal brain BAM files regarding *CTBP1* gene at chr4:1240956-1242536. Red lines define the SRO region, while the blue one pinpoint the splicing site. The title of every subplot provides three information: chromosome location, BAM file name, and gene strand.

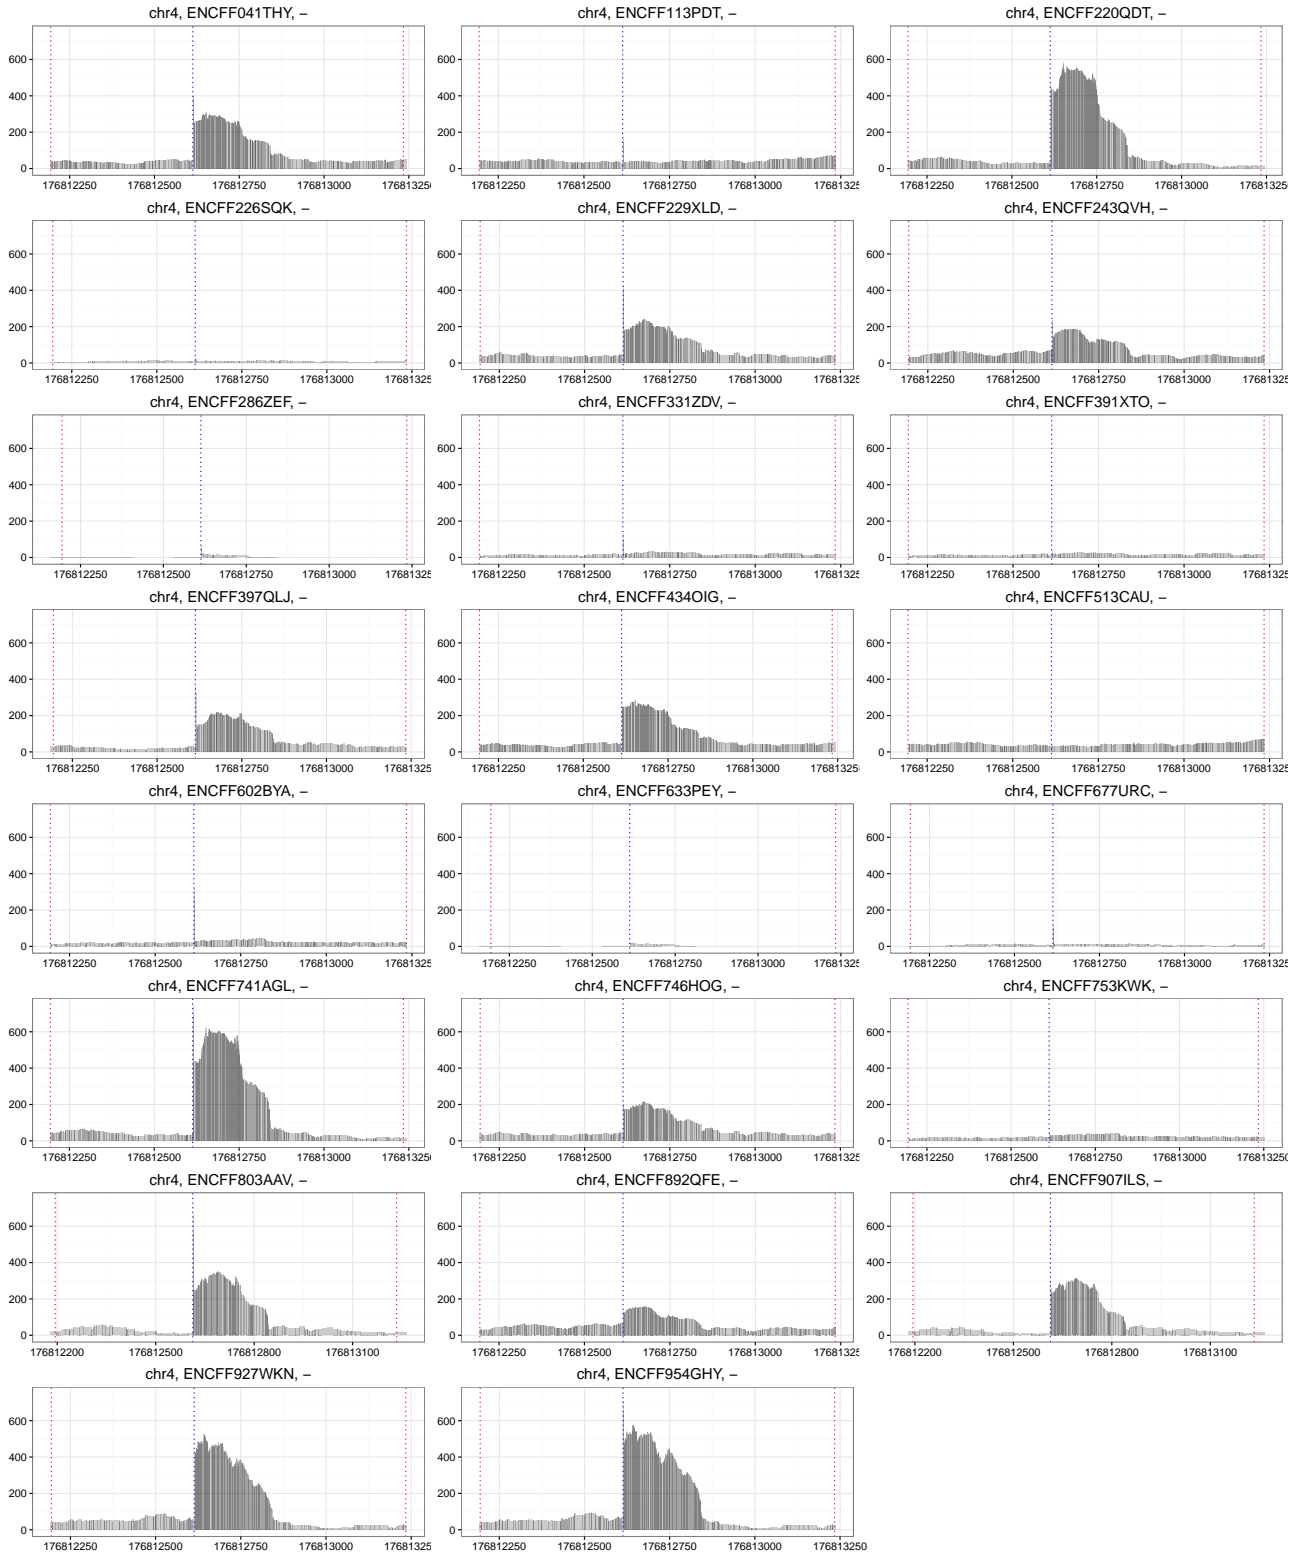

Figure S80: Read coverage in 23 fetal brain BAM files regarding *GPM6A* gene at chr4:176812194-176813234. Red lines define the SRO region, while the blue one pinpoint the splicing site. The title of every subplot provides three information: chromosome location, BAM file name, and gene strand.

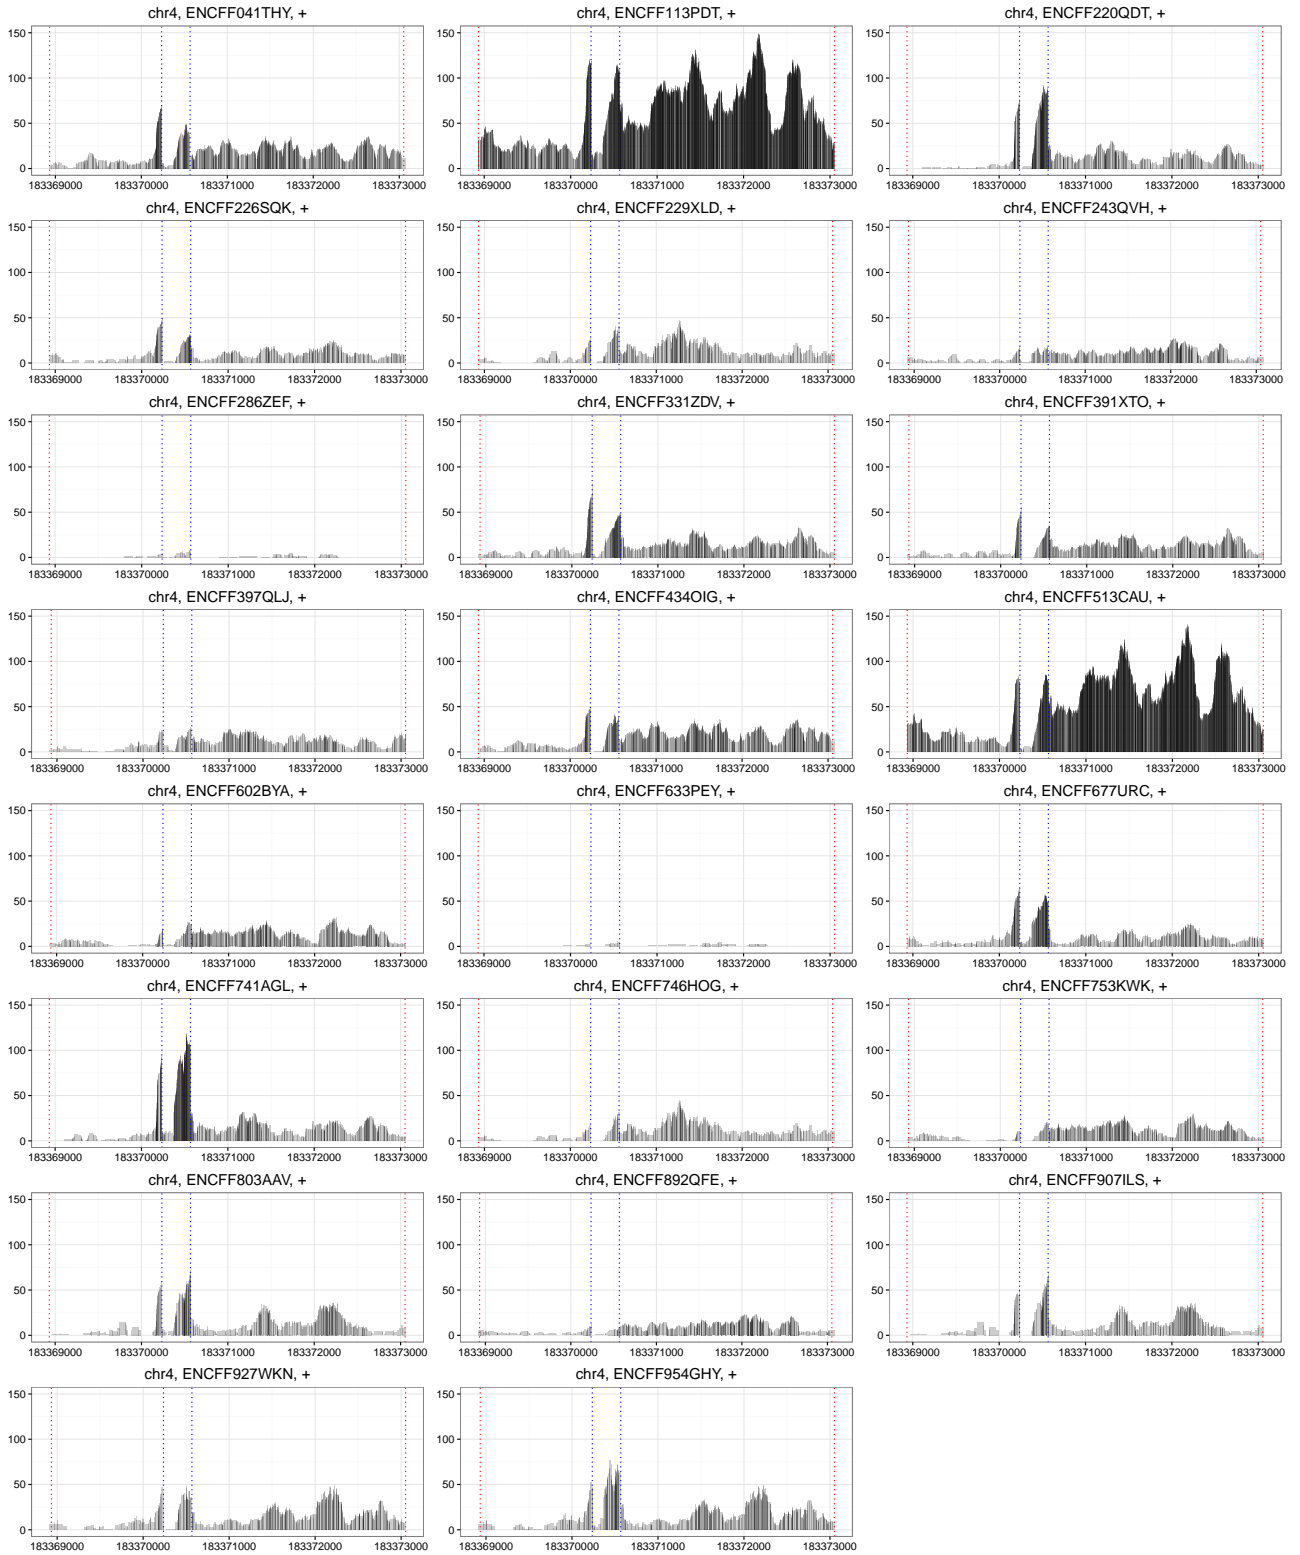

Figure S81: Read coverage in 23 fetal brain BAM files regarding *TENM3* gene at chr4:183368933-183373052. Red lines define the SRO region, while the blue one pinpoint the splicing site. The title of every subplot provides three information: chromosome location, BAM file name, and gene strand.

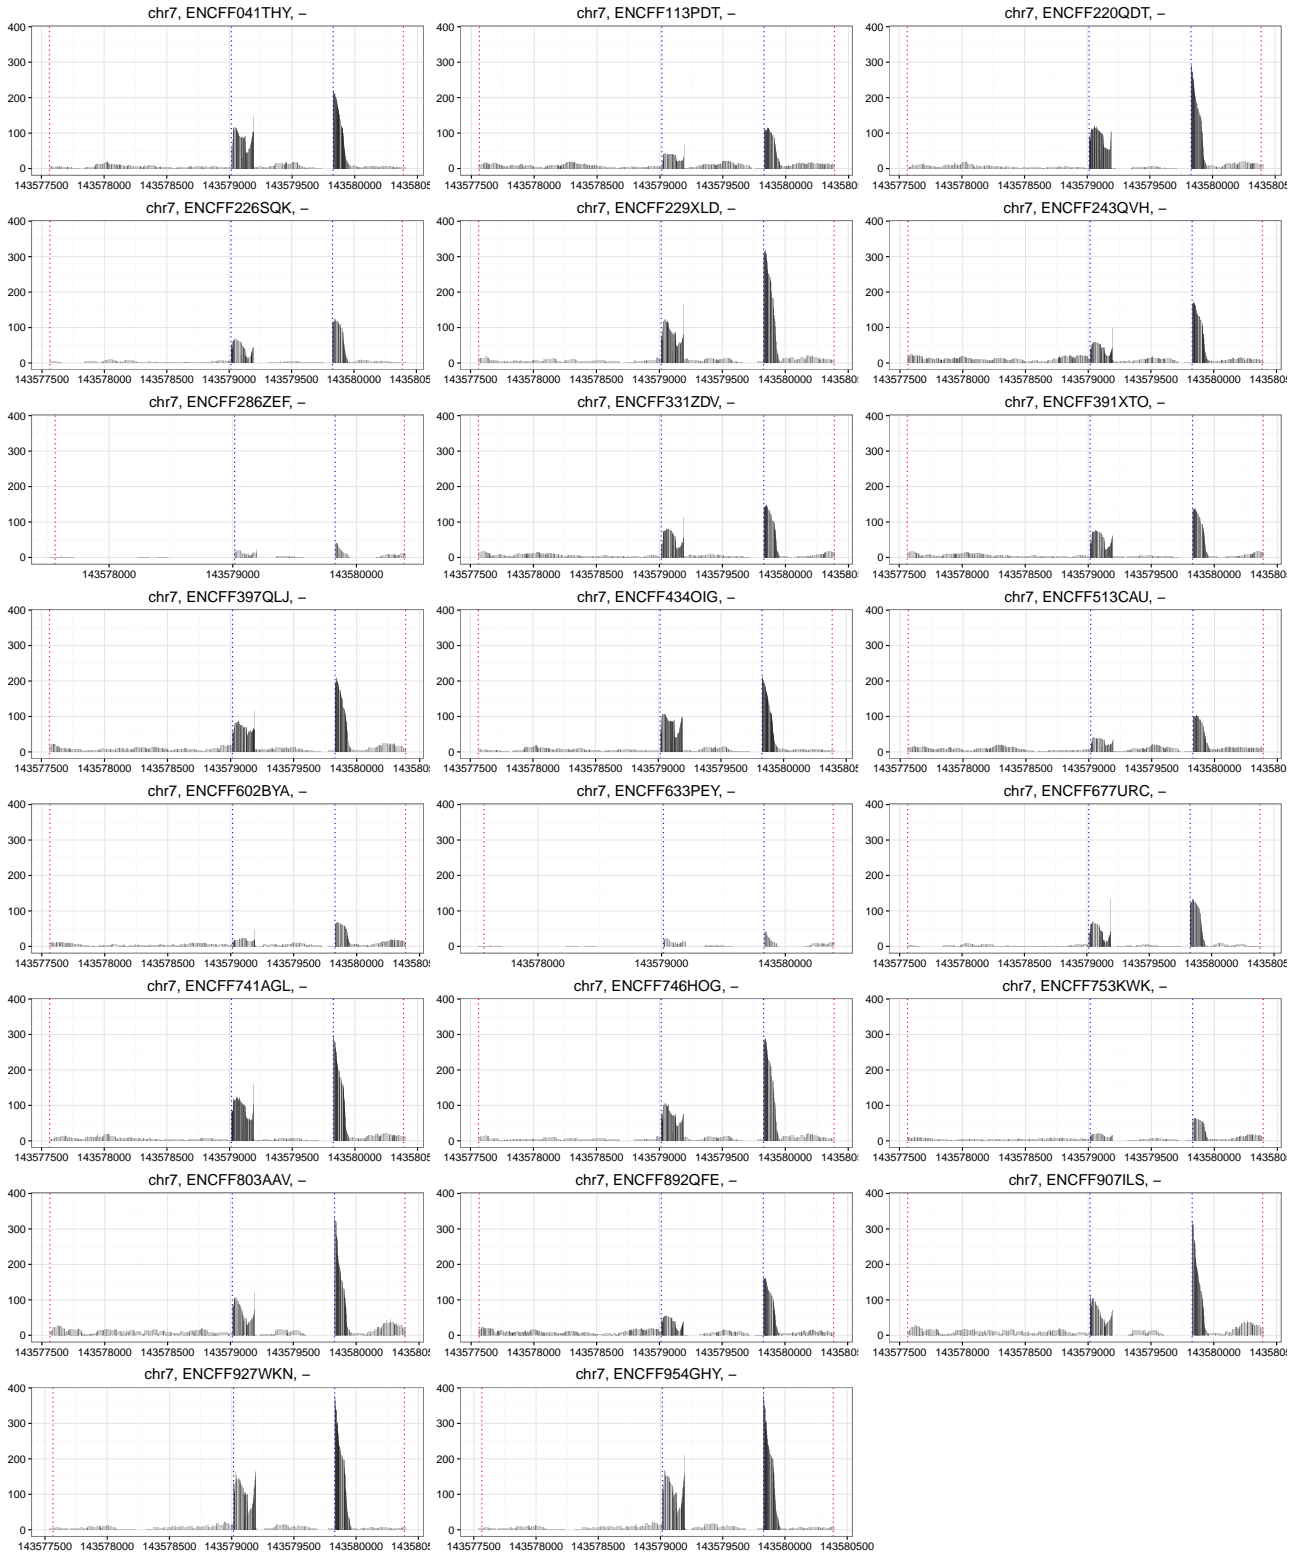

Figure S82: Read coverage in 23 fetal brain BAM files regarding *FAM115A* gene at chr7:143577564-143580388. Red lines define the SRO region, while the blue one pinpoint the splicing site. The title of every subplot provides three information: chromosome location, BAM file name, and gene strand.

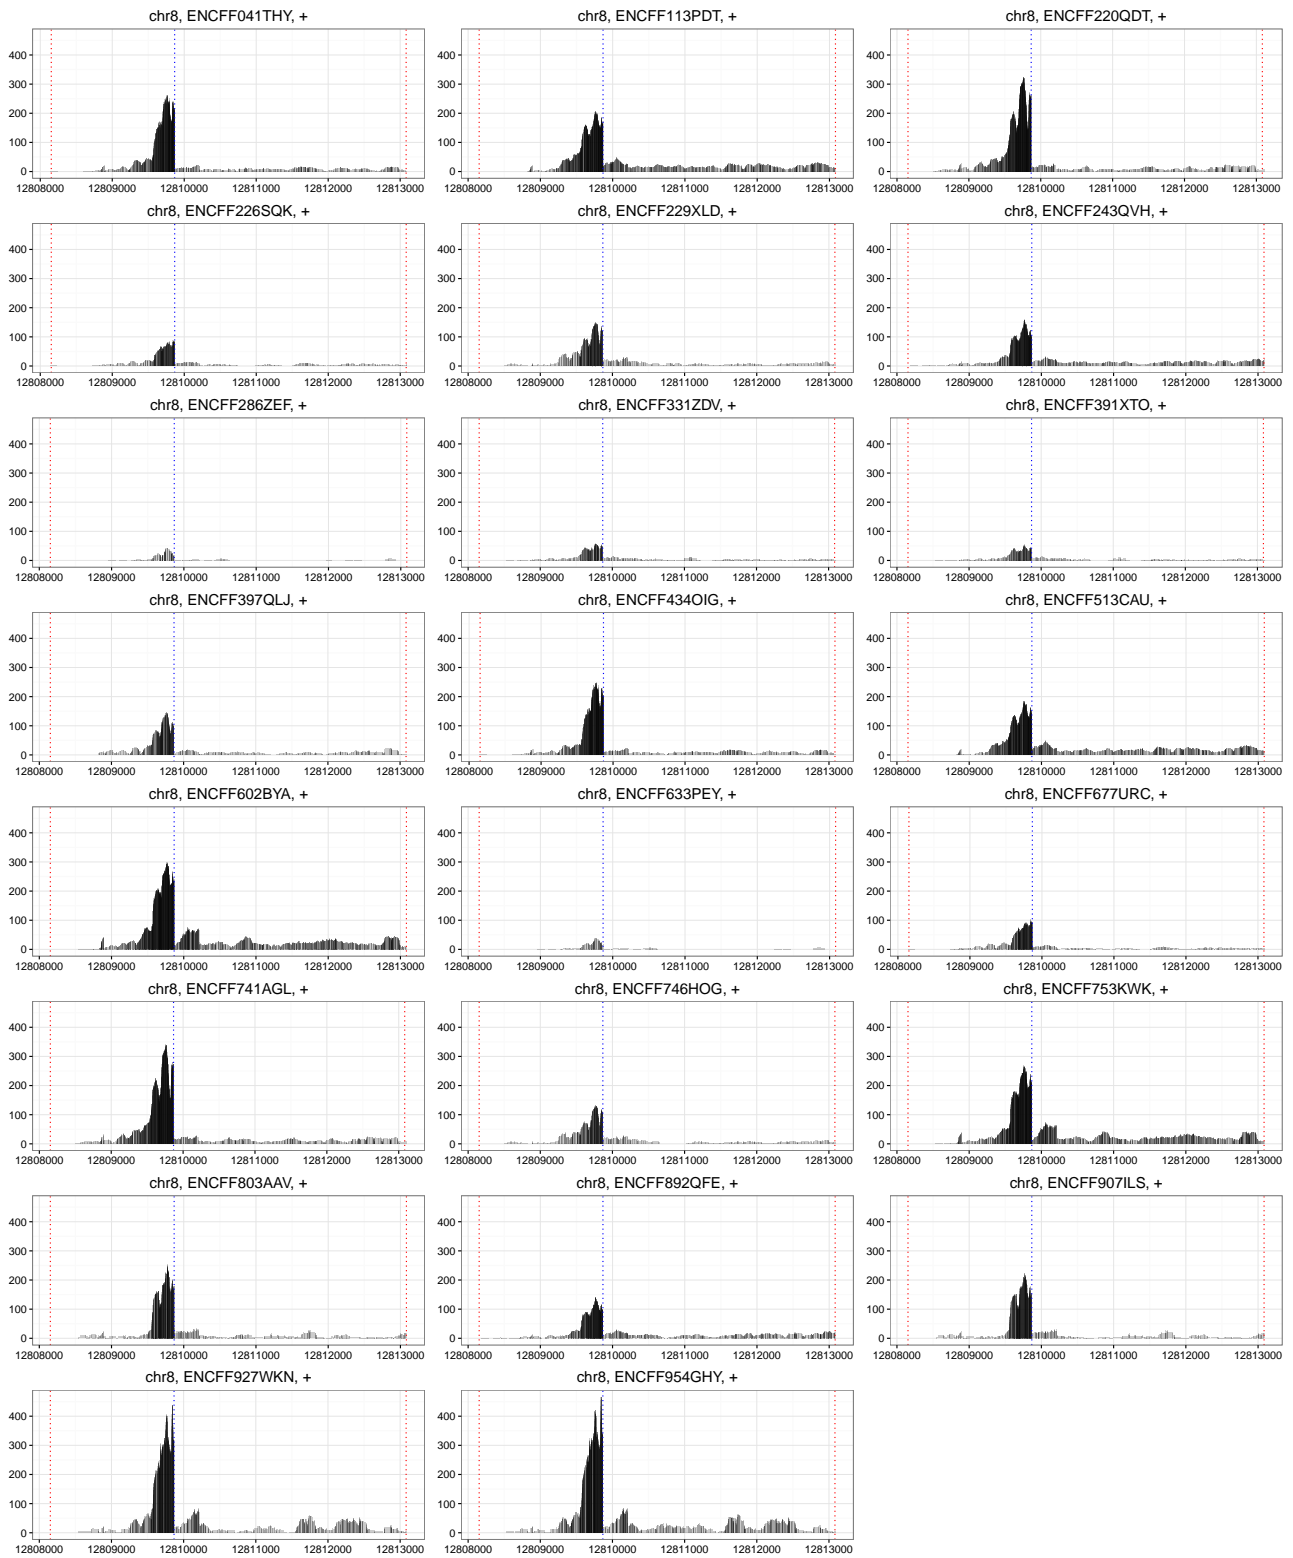

Figure S83: Read coverage in 23 fetal brain BAM files regarding *KIAA1456* gene at chr8:12808153-12813083. Red lines define the SRO region, while the blue one pinpoint the splicing site. The title of every subplot provides three information: chromosome location, BAM file name, and gene strand.

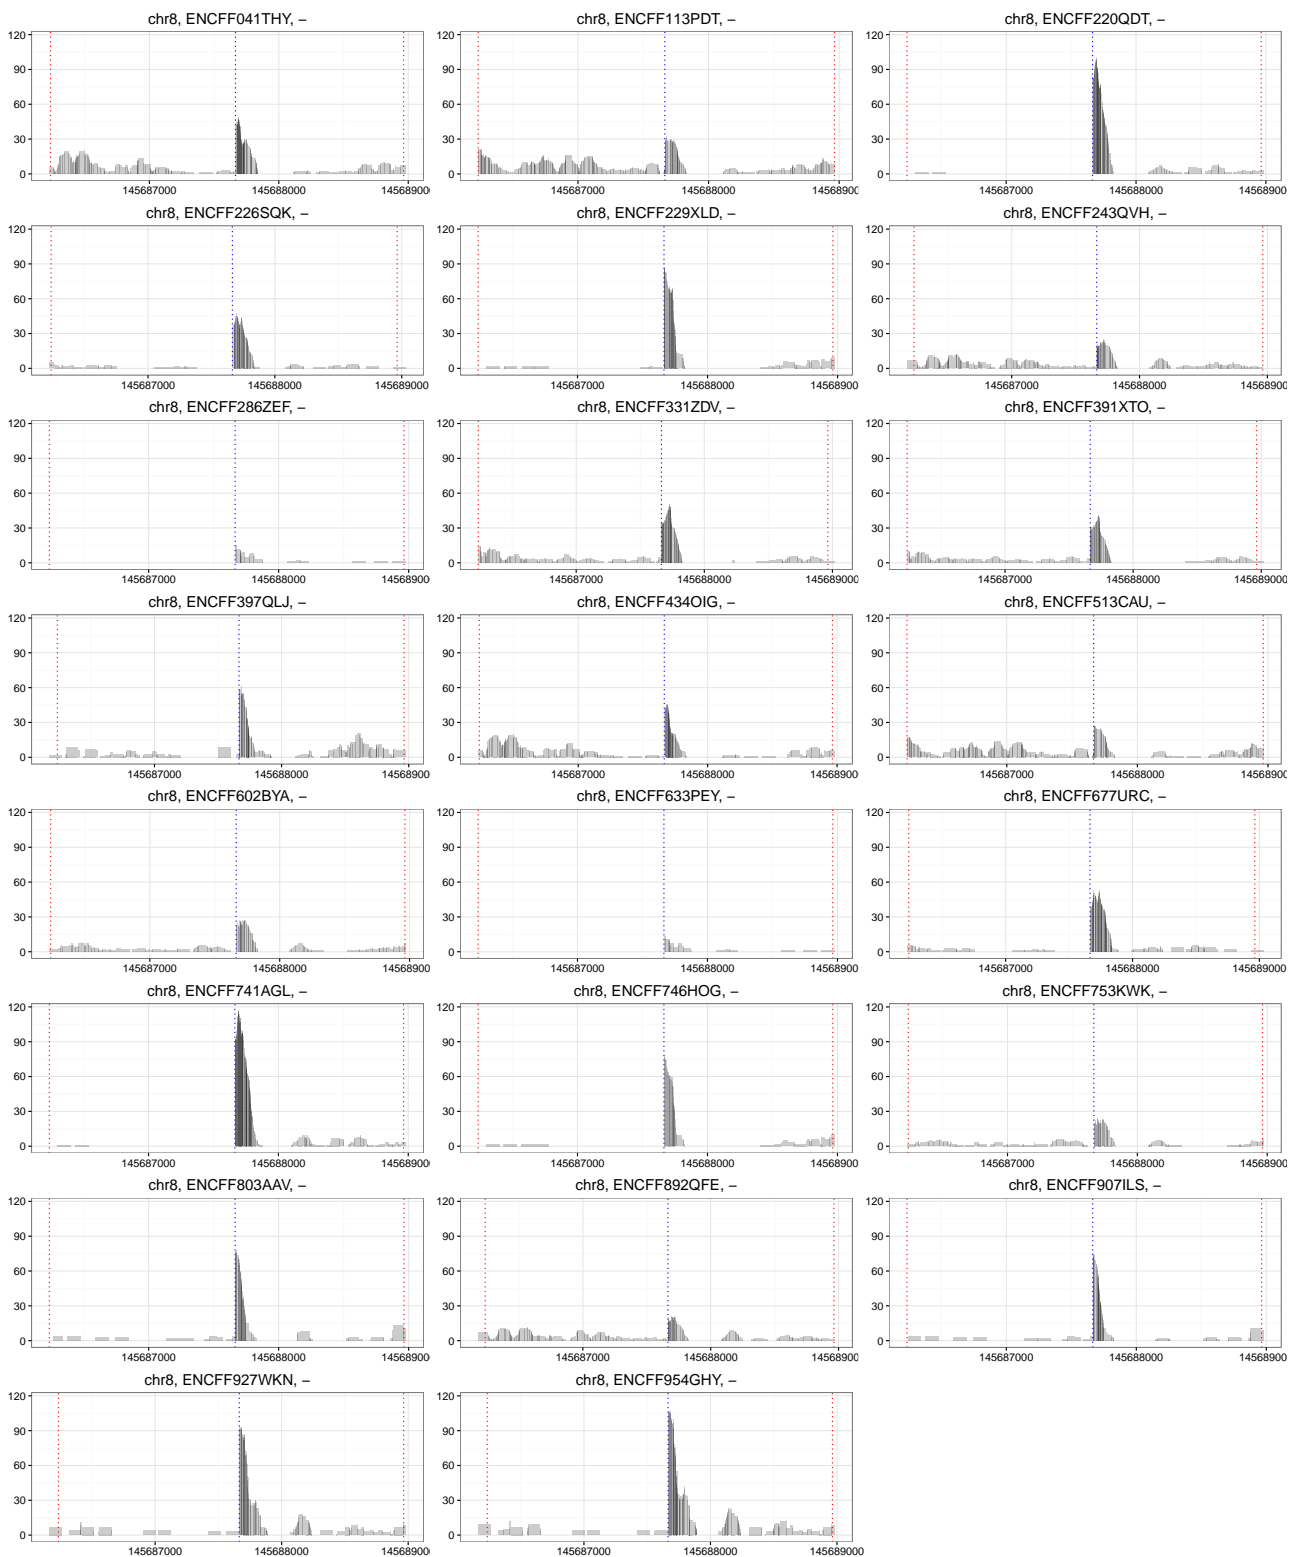

Figure S84: Read coverage in 23 fetal brain BAM files regarding *CYHR1* gene at chr8:145686236-145688964. Red lines define the SRO region, while the blue one pinpoint the splicing site. The title of every subplot provides three information: chromosome location, BAM file name, and gene strand.

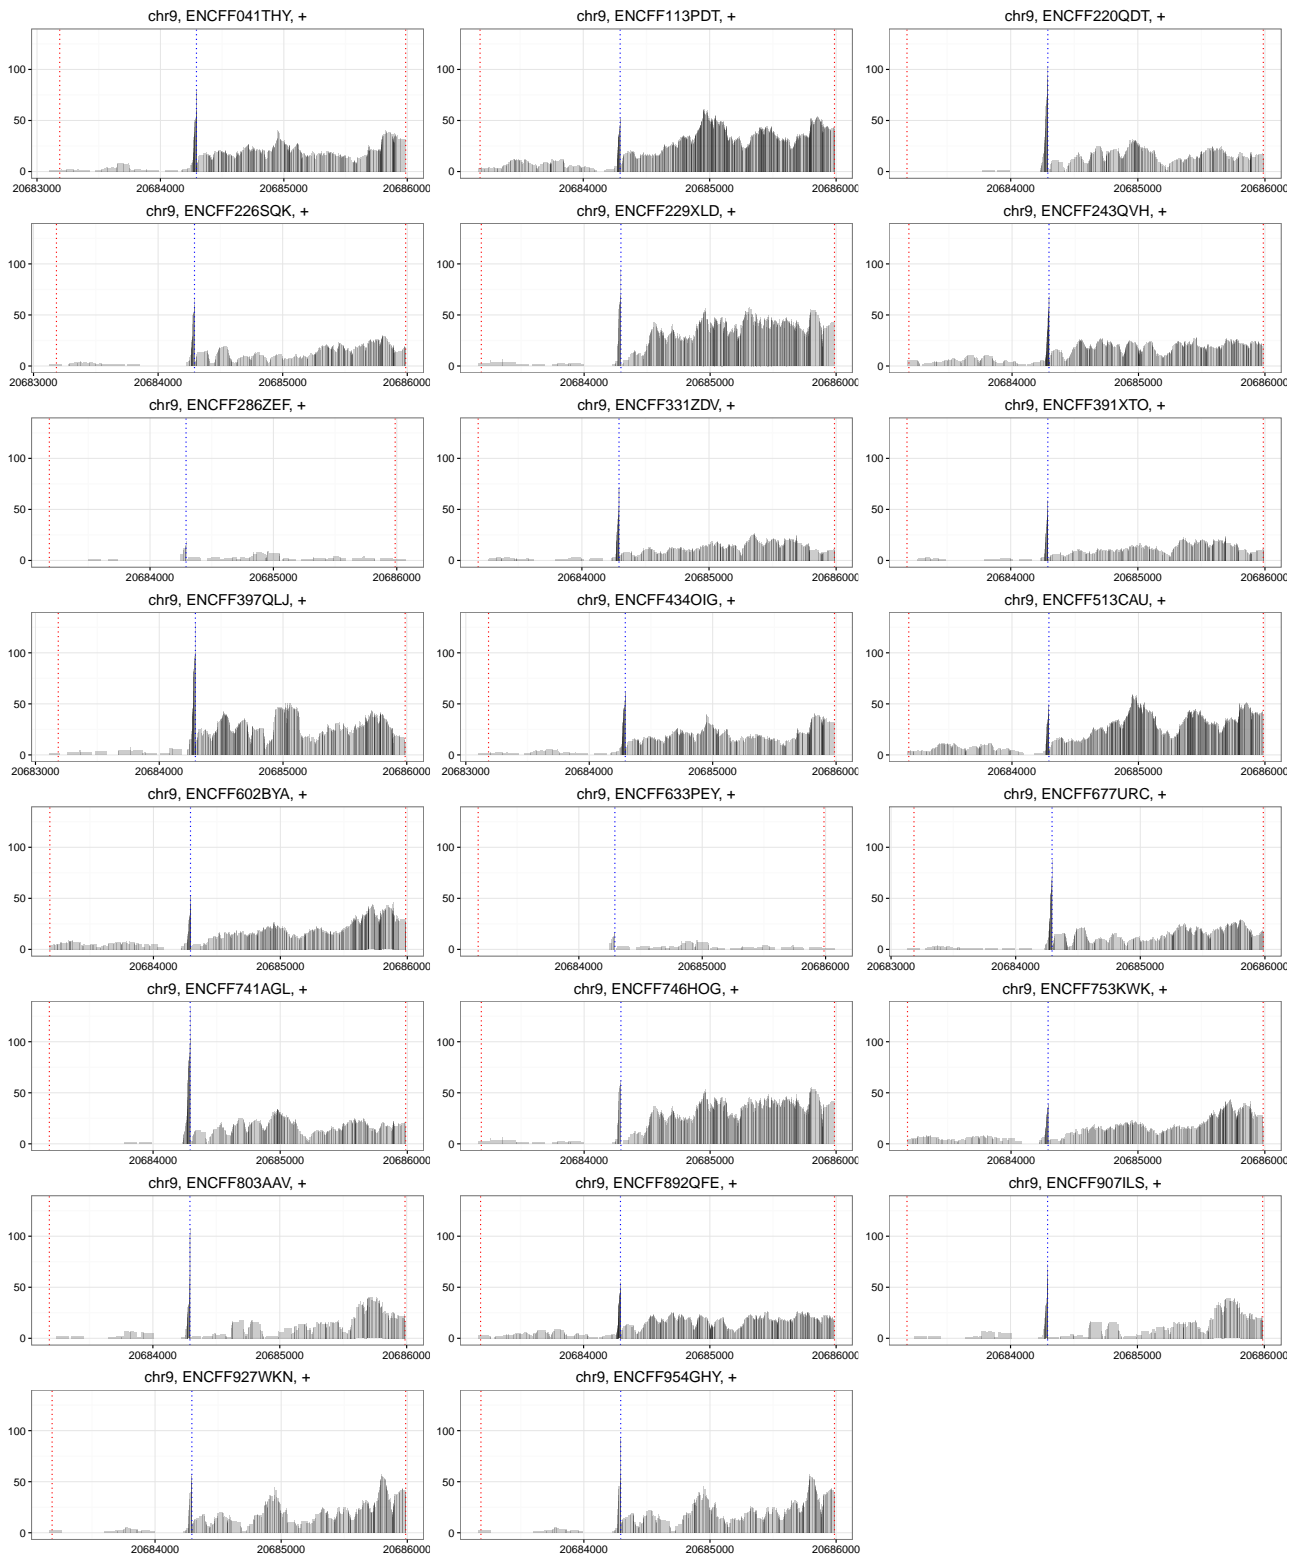

Figure S85: Read coverage in 23 fetal brain BAM files regarding *FOCAD* gene at chr9:20683184-20685987. Red lines define the SRO region, while the blue one pinpoint the splicing site. The title of every subplot provides three information: chromosome location, BAM file name, and gene strand.

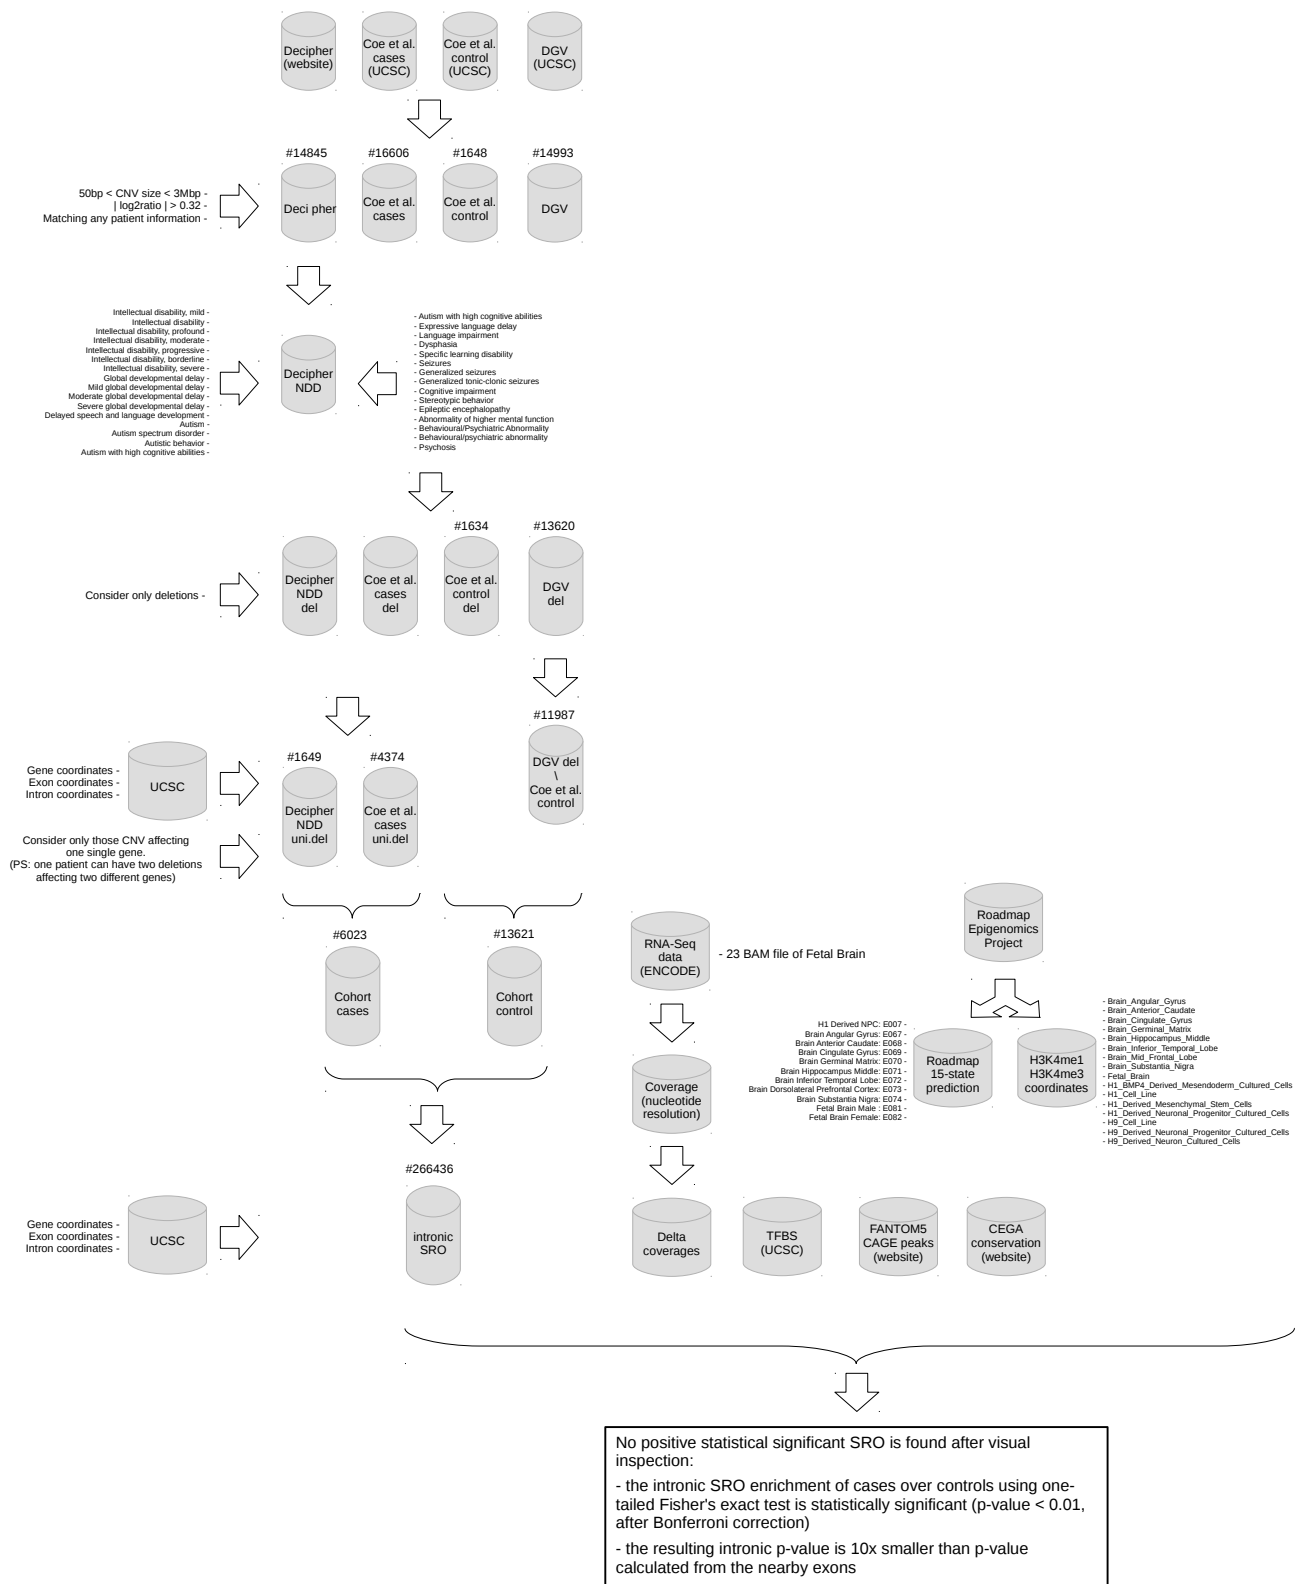

Figure S86: Whole genome analysis overview in traditional settings.



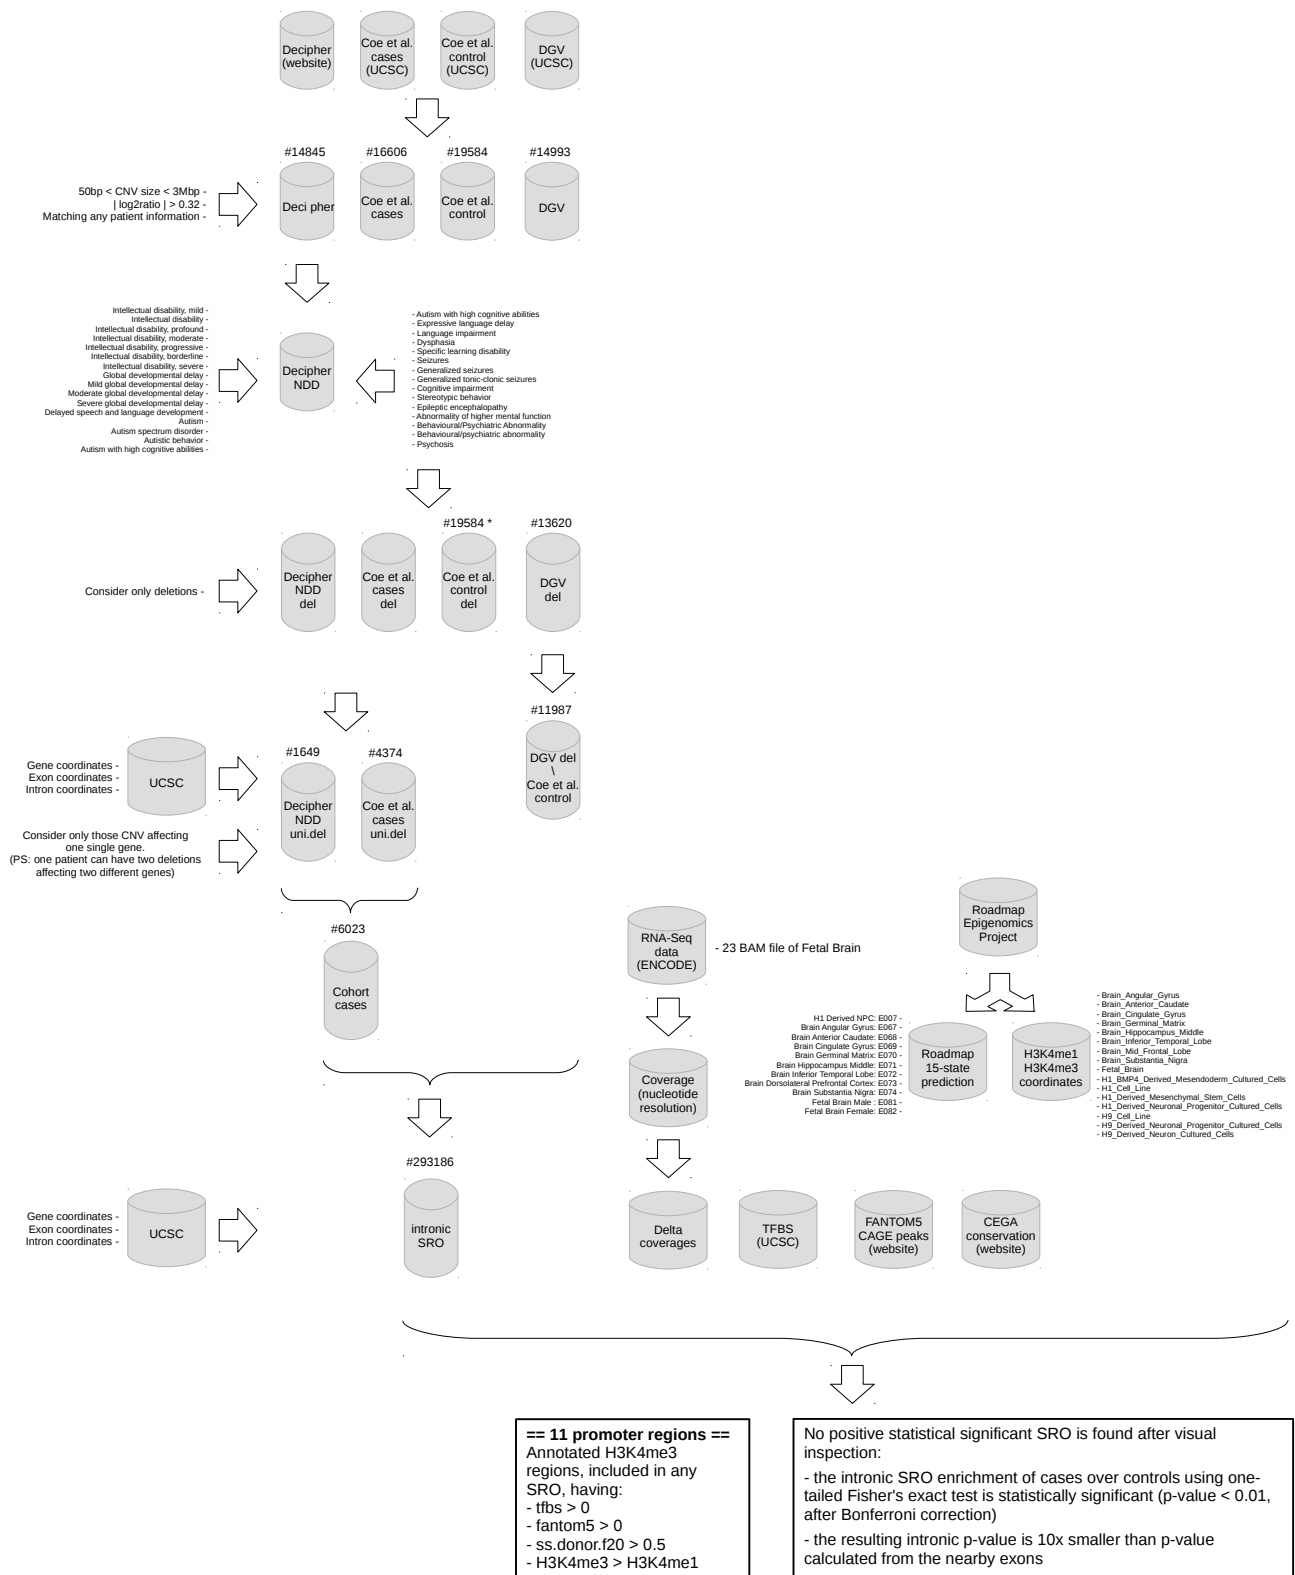

**== 11 promoter regions ==**  
 Annotated H3K4me3 regions, included in any SRO, having:  
 - tfbs > 0  
 - fantom5 > 0  
 - ss.donor.f20 > 0.5  
 - H3K4me3 > H3K4me1

No positive statistical significant SRO is found after visual inspection:  
 - the intronic SRO enrichment of cases over controls using one-tailed Fisher's exact test is statistically significant (p-value < 0.01, after Bonferroni correction)  
 - the resulting intronic p-value is 10x smaller than p-value calculated from the nearby exons

Figure S87: This whole genome analysis overview is for both the knowledge-driven analysis and the data-driven analysis in alternative settings. The two workflows differ for the final results (see Figure 6, article), the former produced a list of 11 putative promoter regions, the latter produced no positive statistical significant region after visual inspection. “\*”: although we pull duplications out the dataset, the number of patients stays constant.

TCAGCCCCTTCTCCACCCCACTGCCCAGCGCTCCCACAGTACTCTGGATTGCAGCAAGC

CACTGGCTTTTACCAAATCGGGAGCTGCAGTATGTTTTCTTCTTCTTCTTCTTCTCAGAGGAATA

ATTCAGCCCCTTCTCAGCTCGCATGACAATCTTGTGTGACTGGGGAGAGTAGGCGGGCACATCCTTTT

ACATGCTAATACTGCCCACCTCCTTTGAACCCTCCTCTAAGTGCCTGGCTTCCTTTATTTTTATGG

TTTATTTTTATTTTTATTTTTATTTTTATTTTTACCTCCCCAAATTCACCGTAGGGGAAAAATTCTTTC

TTGGTTCTGTCCCTCCCCCACACGCTCGTTCCCAGGGAAGGGAGACCCGAGAGGCTCGGTACTT

GCCCGCGCGTTGCTTCCACCGGGGCTCCGGGATGGCCACGCGGGTGCAGGGGGCAGTGATCGAAGC

GGCAGCTCGGTCTAGGCTGTGCTCCATGTGCCCGGCGAGCACAGCGTTTGGGTCCCCAGCGAGCTG

CCACTGCCGAGCCCGGAAGGAATGTCCCCTGTTGTTAAGGACCCTGACTGTTTTACACCAATGATTT  
M S P V V K D P D C F T P M I

GCCACTGCAAAGTTGCTTGCACCAACAACACTTTATCGTTGATGTTGGATGCAAG |GTAGGAAGAGGT  
C H C K V A C T N N T L S L M F G C K |

TCATGTCTTTTAAATGCATGTTGCCTCCCTCGGGGAGAGAAACAATTCCTTCTGTTGCTGTTTATGT

Figure S88: Excerpt of HPin7 sequence at chr11:84431259-84432006 (reverse strand) to highlight the coding regions (red, see Supplementary Note 5) and CAGE peaks (underlined). CFEin7 coding region is at chr11:84431339-84431401. The upstream AA sequence shown in gray (MSPVVKDPDCFTP) corresponds to the mismatch between the predicted human isoforms and the mouse protein isoform Q91XM9-2 (see Supplementary Notes 4 and 5). It is unclear whether this mismatch is due to an evolutionary acquired difference, an error in the mouse protein sequence or an error of the NCBI Gnomon prediction tool [8]. CAGE peaks coordinates are chr11:84431433-84431498, chr11:84431758-84431819, chr11:84431829-84431834, chr11:84431892-84431908 and chr11:84431944-84431992. The vertical bar at the end of the coding region details the splicing site towards *DLG2* exon 8. On a bioinformatics technical level, while the 3' ends of the CFEs (i.e. the splicing sites) were identifiable by single-nucleotide differential coverage, their 5' beginning assessments are challenging due to the possible multiple transcription start sites [9], as suggested by the several upstream robust CAGE peaks. Coordinates are 1-based inclusive and in hg19. CFEin7 coding DNA sequence is registered in GenBank with reference KY368395.

GCTGATTTACCTGCGAGGCTGTATGTGGATCTGTCTTTATGTGGCCACTGCCGCCAGCACGTACTGTC

AAGATAGAGGGAAGCCAAAGCGAGGATTGTAAGTCCCAAGCCTAGAGAGGGAGGTGAGCTGCCTCCG

GACTTGACTGCAGCTTCCCTTCCTCCTGACACACATGGAGTTTGGTGGCGACGGTGCCGGTGCCGAAG

AACTGCAGACAAATACTTAGCCAACTGGATGTGTGTGAGCTGGCTACAAAGGCAGCGCCTGCCTCACC

CGGACCTCCTGCTGGCAGGATGTAAATATACCTGCAGACTGGCCAAACAGGACTGCCTTTTCTCCCC

AACCCCTCCCTCCTCCACCTCTCCCTCAGCTAACCCAGCATGAGAGGAACTGAGAAAGCAACAGCCT

GCAAGTGACAGCTCCAGCCTGATTCTGTTCGTCTCTGAGCCGAGGTGGGAAGTTGATTGTGCGGCAGC

TTCATTGTGAATTCCTTCCATTGGCATCGCTATGTTTGCCTCTATCTGGTATGCTAAGAAGCTGGGTC

M F A S I W Y A K K L G

GCAGGTTCTGTCACAATGCCAGGAAGGCGAAATCAGAGAAG |GTATGGAATGAGTGGGGTTGAAAATTA

R R F V H N A R K A K S E K |

CCTTTCGGTTTGCCAACTGCCTGCTCTGGACCATTGGTCTGAGTACAGACGCAGTCTTTATTTGCTT

Figure S89: Excerpt of HPin8 sequence at chr11:84148336-84149015 (reverse strand) to highlight the coding regions (red, see Supplementary Note 5) and CAGE peaks (underlined). CFEin8 coding region is at chr11:84148431-84148508. CAGE peaks coordinates are chr11:84148566-84148597, chr11:84148599-84148663, chr11:84148844-84148867 and chr11:84148870-84148881. The vertical bar at the end of the coding region details the splicing site towards *DLG2* exon 11. On a bioinformatics technical level, while the 3' ends of the CFEs (i.e. the splicing sites) were identifiable by single-nucleotide differential coverage, their 5' beginning assessments are challenging due to the possible multiple transcription start sites [9], as suggested by the several upstream robust CAGE peaks. Coordinates are 1-based inclusive and in hg19. CFEin8 coding DNA sequence is registered in GenBank with reference KY368394.

| chromosome | start    | end      | width | exon number |
|------------|----------|----------|-------|-------------|
| chr11      | 83166056 | 83170967 | 4912  | 34          |
| chr11      | 83172585 | 83173136 | 552   | 33          |
| chr11      | 83177751 | 83177860 | 110   | 32          |
| chr11      | 83180244 | 83180416 | 173   | 31          |
| chr11      | 83182669 | 83182770 | 102   | 30          |
| chr11      | 83183770 | 83183820 | 51    | 29          |
| chr11      | 83191415 | 83191456 | 42    | 28          |
| chr11      | 83194296 | 83194341 | 46    | 27          |
| chr11      | 83195172 | 83195271 | 100   | 26          |
| chr11      | 83243751 | 83243826 | 76    | 25          |
| chr11      | 83252725 | 83252901 | 177   | 24          |
| chr11      | 83342231 | 83344368 | 2138  | 23          |
| chr11      | 83393201 | 83393468 | 268   | 22          |
| chr11      | 83497484 | 83497835 | 352   | 21          |
| chr11      | 83544657 | 83544813 | 157   | 20          |
| chr11      | 83585463 | 83585531 | 69    | 19          |
| chr11      | 83641371 | 83641526 | 156   | 18          |
| chr11      | 83673928 | 83674066 | 139   | 17          |
| chr11      | 83676367 | 83676511 | 145   | 16          |
| chr11      | 83691549 | 83691685 | 137   | 15          |
| chr11      | 83770358 | 83770527 | 170   | 14          |
| chr11      | 83809966 | 83810090 | 125   | 13          |
| chr11      | 83874504 | 83874554 | 51    | 12          |
| chr11      | 83962281 | 83962334 | 54    | 11          |
| chr11      | 83984194 | 83984323 | 130   | 10          |
| chr11      | 84027868 | 84028382 | 515   | 9           |
| chr11      | 84245613 | 84245774 | 162   | 8           |
| chr11      | 84634121 | 84634465 | 345   | 7           |
| chr11      | 84822705 | 84822779 | 75    | 6           |
| chr11      | 84865600 | 84865695 | 96    | 5           |
| chr11      | 84996264 | 84996409 | 146   | 4           |
| chr11      | 85309701 | 85309832 | 132   | 3           |
| chr11      | 85337631 | 85337797 | 167   | 2           |
| chr11      | 85338262 | 85338314 | 53    | 1           |

Table S1: *DLG2* UCSC exon coordinates, retrieved from *TxDb.Hsapiens.UCSC.hg19.knownGene* R package version 3.2.2. All exons were unified into a single isoform.

| chromosome | start    | end      | width | exon number |
|------------|----------|----------|-------|-------------|
| chr11      | 83166055 | 83170967 | 4913  | 47          |
| chr11      | 83172585 | 83173192 | 608   | 46          |
| chr11      | 83177751 | 83177860 | 110   | 45          |
| chr11      | 83180244 | 83180416 | 173   | 44          |
| chr11      | 83182669 | 83182770 | 102   | 43          |
| chr11      | 83183770 | 83183820 | 51    | 42          |
| chr11      | 83191415 | 83191692 | 278   | 41          |
| chr11      | 83194296 | 83194341 | 46    | 40          |
| chr11      | 83195172 | 83195271 | 100   | 39          |
| chr11      | 83197198 | 83197294 | 97    | 38          |
| chr11      | 83243751 | 83243826 | 76    | 37          |
| chr11      | 83252725 | 83252901 | 177   | 36          |
| chr11      | 83342231 | 83344368 | 2138  | 35          |
| chr11      | 83362882 | 83362973 | 92    | 34          |
| chr11      | 83392875 | 83393049 | 175   | 33          |
| chr11      | 83393201 | 83393468 | 268   | 32          |
| chr11      | 83435899 | 83435999 | 101   | 31          |
| chr11      | 83436213 | 83436446 | 234   | 30          |
| chr11      | 83497484 | 83497835 | 352   | 29          |
| chr11      | 83544657 | 83544813 | 157   | 28          |
| chr11      | 83585463 | 83585531 | 69    | 27          |
| chr11      | 83641371 | 83641526 | 156   | 26          |
| chr11      | 83673928 | 83674066 | 139   | 25          |
| chr11      | 83676367 | 83676511 | 145   | 24          |
| chr11      | 83691549 | 83691685 | 137   | 23          |
| chr11      | 83770358 | 83770527 | 170   | 22          |
| chr11      | 83809966 | 83810090 | 125   | 21          |
| chr11      | 83874504 | 83874554 | 51    | 20          |
| chr11      | 83877871 | 83878047 | 177   | 19          |
| chr11      | 83962281 | 83962334 | 54    | 18          |
| chr11      | 83983185 | 83983343 | 159   | 17          |
| chr11      | 83984194 | 83984323 | 130   | 16          |
| chr11      | 84027868 | 84028382 | 515   | 15          |
| chr11      | 84148431 | 84148852 | 422   | 14          |
| chr11      | 84245613 | 84245774 | 162   | 13          |
| chr11      | 84397843 | 84398320 | 478   | 12          |
| chr11      | 84634121 | 84634633 | 513   | 11          |
| chr11      | 84822705 | 84822779 | 75    | 10          |
| chr11      | 84843812 | 84844167 | 356   | 9           |
| chr11      | 84865600 | 84865695 | 96    | 8           |
| chr11      | 84996264 | 84996409 | 146   | 7           |
| chr11      | 85180382 | 85180766 | 385   | 6           |
| chr11      | 85236035 | 85236066 | 32    | 5           |
| chr11      | 85309701 | 85309832 | 132   | 4           |
| chr11      | 85336151 | 85336295 | 145   | 3           |
| chr11      | 85337631 | 85337797 | 167   | 2           |
| chr11      | 85338262 | 85338966 | 705   | 1           |

Table S2: *DLG2* Ensembl exon coordinates, retrieved from *GenomicFeatures* R package version 1.22.13, release 84, reference GRCh37.p13. All exons were unified into a single isoform.

| Ensembl exon number | UCSC exon number |
|---------------------|------------------|
| 47                  | 34               |
| 46                  | 33               |
| 45                  | 32               |
| 44                  | 31               |
| 43                  | 30               |
| 42                  | 29               |
| 41                  | 28               |
| 40                  | 27               |
| 39                  | 26               |
| 37                  | 25               |
| 36                  | 24               |
| 35                  | 23               |
| 32                  | 22               |
| 29                  | 21               |
| 28                  | 20               |
| 27                  | 19               |
| 26                  | 18               |
| 25                  | 17               |
| 24                  | 16               |
| 23                  | 15               |
| 22                  | 14               |
| 21                  | 13               |
| 20                  | 12               |
| 18                  | 11               |
| 16                  | 10               |
| 15                  | 9                |
| 13                  | 8                |
| 11                  | 7                |
| 10                  | 6                |
| 8                   | 5                |
| 7                   | 4                |
| 4                   | 3                |
| 2                   | 2                |
| 1                   | 1                |

Table S3: Mapping between Ensembl and UCSC exon numbers for *DLG2* gene.

| chromosome | start    | end      | width | exon number |
|------------|----------|----------|-------|-------------|
| chr7       | 91090786 | 91091048 | 263   | 1           |
| chr7       | 91449754 | 91449915 | 162   | 2           |
| chr7       | 91672492 | 91672954 | 463   | 3           |
| chr7       | 91733091 | 91733144 | 54    | 4           |
| chr7       | 91810479 | 91810529 | 51    | 5           |
| chr7       | 91872376 | 91872500 | 125   | 6           |
| chr7       | 91900735 | 91900904 | 170   | 7           |
| chr7       | 91939999 | 91940135 | 137   | 8           |
| chr7       | 91965596 | 91965740 | 145   | 9           |
| chr7       | 91968118 | 91968256 | 139   | 10          |
| chr7       | 91997166 | 91998815 | 1650  | 11          |
| chr7       | 92040798 | 92040866 | 69    | 12          |
| chr7       | 92062394 | 92062459 | 66    | 13          |
| chr7       | 92066257 | 92066406 | 150   | 14          |
| chr7       | 92088562 | 92088718 | 157   | 15          |
| chr7       | 92126540 | 92126642 | 103   | 16          |
| chr7       | 92234970 | 92235224 | 255   | 17          |
| chr7       | 92286491 | 92286605 | 115   | 18          |
| chr7       | 92375554 | 92375730 | 177   | 19          |
| chr7       | 92386915 | 92386990 | 76    | 20          |
| chr7       | 92417224 | 92417323 | 100   | 21          |
| chr7       | 92418088 | 92418133 | 46    | 22          |
| chr7       | 92420632 | 92420673 | 42    | 23          |
| chr7       | 92427691 | 92427741 | 51    | 24          |
| chr7       | 92428557 | 92428658 | 102   | 25          |
| chr7       | 92430997 | 92431169 | 173   | 26          |
| chr7       | 92437965 | 92438074 | 110   | 27          |
| chr7       | 92442604 | 92442695 | 92    | 28          |
| chr7       | 92444511 | 92449246 | 4736  | 29          |

Table S4: *Dlg2* UCSC exon coordinates, retrieved from *TxDb.Mmusculus.UCSC.mm10.knownGene* R package version 3.2.2. All exons were unified into a single isoform.

| chromosome | start    | end      | width | strand | exon number |
|------------|----------|----------|-------|--------|-------------|
| chr7       | 90915744 | 90916086 | 343   | +      | 1           |
| chr7       | 91279442 | 91279603 | 162   | +      | 2           |
| chr7       | 91514852 | 91515314 | 463   | +      | 3           |
| chr7       | 91553285 | 91553660 | 376   | +      | 4           |
| chr7       | 91574802 | 91574855 | 54    | +      | 5           |
| chr7       | 91648259 | 91648309 | 51    | +      | 6           |
| chr7       | 91719778 | 91719902 | 125   | +      | 7           |
| chr7       | 91748638 | 91748807 | 170   | +      | 8           |
| chr7       | 91788170 | 91788306 | 137   | +      | 9           |
| chr7       | 91810939 | 91811083 | 145   | +      | 10          |
| chr7       | 91813757 | 91813895 | 139   | +      | 11          |
| chr7       | 91843204 | 91844853 | 1650  | +      | 12          |
| chr7       | 91895796 | 91895864 | 69    | +      | 13          |
| chr7       | 91921111 | 91921176 | 66    | +      | 14          |
| chr7       | 91925497 | 91925646 | 150   | +      | 15          |
| chr7       | 91940008 | 91940164 | 157   | +      | 16          |
| chr7       | 91979857 | 91979959 | 103   | +      | 17          |
| chr7       | 92034522 | 92034890 | 369   | +      | 18          |
| chr7       | 92081648 | 92081949 | 302   | +      | 19          |
| chr7       | 92132855 | 92134707 | 1853  | +      | 20          |
| chr7       | 92220656 | 92220832 | 177   | +      | 21          |
| chr7       | 92231936 | 92232011 | 76    | +      | 22          |
| chr7       | 92262252 | 92262351 | 100   | +      | 23          |
| chr7       | 92263114 | 92263159 | 46    | +      | 24          |
| chr7       | 92265641 | 92265682 | 42    | +      | 25          |
| chr7       | 92272685 | 92272735 | 51    | +      | 26          |
| chr7       | 92273551 | 92273652 | 102   | +      | 27          |
| chr7       | 92275991 | 92276163 | 173   | +      | 28          |
| chr7       | 92282915 | 92283024 | 110   | +      | 29          |
| chr7       | 92287729 | 92287820 | 92    | +      | 30          |
| chr7       | 92289638 | 92292131 | 2494  | +      | 31          |

Table S5: *Dlg2* Ensembl exon coordinates (mm10), BALB/cJ strain. All exons were unified into a single isoform.



| chromosome | start    | end      | width | strand | exon number |
|------------|----------|----------|-------|--------|-------------|
| chr7       | 91266035 | 91266377 | 343   | +      | 1           |
| chr7       | 91626714 | 91626875 | 162   | +      | 2           |
| chr7       | 91863528 | 91863990 | 463   | +      | 3           |
| chr7       | 91902921 | 91903296 | 376   | +      | 4           |
| chr7       | 91925797 | 91925850 | 54    | +      | 5           |
| chr7       | 91996610 | 91996660 | 51    | +      | 6           |
| chr7       | 92058858 | 92058982 | 125   | +      | 7           |
| chr7       | 92087930 | 92088099 | 170   | +      | 8           |
| chr7       | 92127690 | 92127826 | 137   | +      | 9           |
| chr7       | 92147820 | 92147964 | 145   | +      | 10          |
| chr7       | 92150145 | 92150283 | 139   | +      | 11          |
| chr7       | 92181780 | 92183429 | 1650  | +      | 12          |
| chr7       | 92226350 | 92226418 | 69    | +      | 13          |
| chr7       | 92249008 | 92249073 | 66    | +      | 14          |
| chr7       | 92254028 | 92254177 | 150   | +      | 15          |
| chr7       | 92273175 | 92273331 | 157   | +      | 16          |
| chr7       | 92314759 | 92314861 | 103   | +      | 17          |
| chr7       | 92369395 | 92369763 | 369   | +      | 18          |
| chr7       | 92417900 | 92418201 | 302   | +      | 19          |
| chr7       | 92468539 | 92470391 | 1853  | +      | 20          |
| chr7       | 92550155 | 92550331 | 177   | +      | 21          |
| chr7       | 92560927 | 92561002 | 76    | +      | 22          |
| chr7       | 92591908 | 92592007 | 100   | +      | 23          |
| chr7       | 92592770 | 92592815 | 46    | +      | 24          |
| chr7       | 92595297 | 92595338 | 42    | +      | 25          |
| chr7       | 92602298 | 92602348 | 51    | +      | 26          |
| chr7       | 92603164 | 92603265 | 102   | +      | 27          |
| chr7       | 92605604 | 92605776 | 173   | +      | 28          |
| chr7       | 92612539 | 92612648 | 110   | +      | 29          |
| chr7       | 92617168 | 92617259 | 92    | +      | 30          |
| chr7       | 92619077 | 92623800 | 4724  | +      | 31          |

Table S6: *Dlg2* Ensembl exon coordinates (mm10), A/J strain. All exons were unified into a single isoform.

| Ref | ULB Patient ID | CNV type | <i>DLG2</i> CNV hg19 coordinates | CNV size (Mb) | <i>DLG2</i> deleted features | Gender | Other rare CNVs | Inheritance of <i>DLG2</i> variant  | Age of presentation | Clinical description                                                                                                                                                                                                                                                              |
|-----|----------------|----------|----------------------------------|---------------|------------------------------|--------|-----------------|-------------------------------------|---------------------|-----------------------------------------------------------------------------------------------------------------------------------------------------------------------------------------------------------------------------------------------------------------------------------|
| I   | 317136         | del      | chr11:84245639-84772741          | 0.52          | exons 7-8                    | male   | 0 cnv           | inherited from an unaffected mother | 3                   | Global Developmental Delay, motor developmental milestones delay, moderate language delay, stereotypic behavior, delay in social skills, timid, apprehensive to unknown, learning difficulties                                                                                    |
| II  | 317185         | del      | chr11:84334015-84797219          | 0.46          | exon 7                       | male   | 0 cnv           | inherited from an unaffected mother | 1 1/2               | Global Developmental Delay, Severe Language Delay, Social skills delay, special needs education, mild hypotonia, fine motor skills delay, postnatal microcephaly, poor visual contact, absence of facial expressions, low anterior hairline, recurrent otitis media, ear skin tag |

Table S7: Summary of genetic and clinical descriptions of ULB patients.

| Ref | DECIPHER Patient ID | CNV type | <i>DLG2</i> CNV hg19 coordinates | CNV size (Mb) | <i>DLG2</i> deleted features | Gender | Other rare CNVs | Inheritance of <i>DLG2</i> variant | Age of presentation | Clinical description                                                                                                                                   |
|-----|---------------------|----------|----------------------------------|---------------|------------------------------|--------|-----------------|------------------------------------|---------------------|--------------------------------------------------------------------------------------------------------------------------------------------------------|
| III | 248668              | del      | chr11:84548697-84628963          | 0.08          | intron 7                     | male   | 32 cnvs         | unknown                            | 14                  | Abnormality of the face, Cognitive impairment, Low anterior hairline, Macrocephaly, Obesity, Short philtrum, Tall stature, Upslanted palpebral fissure |

|      |        |     |                         |      |            |        |                                                                                           |                                             |    |                                                                                                                                                                                                                                                                                                       |
|------|--------|-----|-------------------------|------|------------|--------|-------------------------------------------------------------------------------------------|---------------------------------------------|----|-------------------------------------------------------------------------------------------------------------------------------------------------------------------------------------------------------------------------------------------------------------------------------------------------------|
| IV   | 256592 | del | chr11:84456097-84607440 | 0.15 | exon 7     | male   | 1 cnv: 30kbp dup on chrY. Genes: AKAP17A, ASMT.                                           | unknown                                     | 11 | Autism, Constipation, Intellectual disability, Macrocephaly, Obesity                                                                                                                                                                                                                                  |
| V    | 263216 | del | chr11:84003279-84276072 | 0.27 | exons 8-9  | male   | 0 cnv                                                                                     | inherited from a parent with same phenotype | 4  |                                                                                                                                                                                                                                                                                                       |
| VI   | 270892 | del | chr11:84108622-84334253 | 0.23 | exon 8     | male   | 0 cnv                                                                                     | inherited from normal parent                | NA | Aggressive behavior, Delayed speech and language development, Dysphasia, Intellectual disability, Stereotypic behavior                                                                                                                                                                                |
| VII  | 272251 | del | chr11:83805117-84215024 | 0.41 | exons 9-13 | female | 3 cnvs: 225kbp dup and 278kbp dup on chr9, 148kbp dup on chr11. Genes: TRPM3, TMEM2, EHF. | inherited from an unaffected mother         | NA | Aggressive behavior, Anxiety, Attention deficit hyperactivity disorder, Autism, Autoaggression, Delayed speech and language development, Hallucinations, Increased body weight, Mild global developmental delay, Motor delay, Precocious puberty in females, Specific learning disability, Strabismus |
| VIII | 273969 | del | chr11:83996254-84214903 | 0.22 | exon 9     | male   | 0 cnv                                                                                     | unknown                                     | NA |                                                                                                                                                                                                                                                                                                       |
| IX   | 278011 | del | chr11:84367238-84721340 | 0.35 | exon 7     | male   | 1 cnv: 300kbp del on chr17 variant inherited from normal parent. Genes: SLC39A11.         | de novo constitutive                        | 3  | Delayed speech and language development, Hyperactivity, Low frustration tolerance                                                                                                                                                                                                                     |
| X    | 281197 | del | chr11:84085773-84477088 | 0.39 | exon 8     | male   | 0 cnv                                                                                     | inherited from an unaffected mother         | 9  | Autism spectrum disorder, Intellectual disability, moderate                                                                                                                                                                                                                                           |

|       |        |     |                         |      |           |         |                                                                                                               |                                     |    |                                                                                                     |
|-------|--------|-----|-------------------------|------|-----------|---------|---------------------------------------------------------------------------------------------------------------|-------------------------------------|----|-----------------------------------------------------------------------------------------------------|
| XI    | 284804 | del | chr11:84046644-84539636 | 0.49 | exon 8    | male    | 0 cnv                                                                                                         | de novo constitutive                | 4  | Autism, Delayed speech and language development                                                     |
| XII   | 286641 | del | chr11:84291759-84477088 | 0.19 | intron 7  | male    | 1 cnv: 290kbp dup on chr17 inherited from mother. 22 genes.                                                   | inherited from an unaffected mother | NA |                                                                                                     |
| XIII  | 288027 | del | chr11:84046530-84454687 | 0.41 | exon 8    | male    | 1 cnv: 130kbp dup on chr7 inherited from mother. Gene: AKAP9.                                                 | inherited from an unaffected mother | NA | Autism, Developmental regression                                                                    |
| XIV   | 288501 | del | chr11:84334017-84595634 | 0.26 | intron 7  | female  | 1 cnv: 180kbp del on chr1. Inheritance unknown. Genes: INPP5B, MTF1, SF3A3.                                   | unknown                             | NA | Abnormality of the palate, Short stature                                                            |
| XV    | 288842 | del | chr11:84334017-84595634 | 0.26 | intron 7  | unknown | 1 cnv: 541kbp del on chr16. Inheritance unknown. 28 genes.                                                    | unknown                             | NA | Abnormality of the eyelid, Premature birth                                                          |
| XVI   | 289734 | del | chr11:84595575-84907579 | 0.31 | exons 5-7 | unknown | 2 cnvs: 191kbp del on chr1 and 101kbp del on chr12; both inherited from mother. Genes: SUMF1, PIK3C2G, RERGL. | de novo constitutive                | NA | Autism, Intellectual disability                                                                     |
| XVII  | 292620 | del | chr11:84046614-84214762 | 0.17 | intron 8  | female  | 0 cnv                                                                                                         | unknown                             | 3  | Dysphasia                                                                                           |
| XVIII | 300042 | del | chr11:84046614-84419502 | 0.37 | exon 8    | unknown | 0 cnv                                                                                                         | unknown                             | NA | Abnormal facial shape, Cutaneous finger syndactyly, Global developmental delay, Hearing abnormality |

|     |        |     |                         |      |          |         |       |                                              |    |                         |
|-----|--------|-----|-------------------------|------|----------|---------|-------|----------------------------------------------|----|-------------------------|
| XIX | 300109 | del | chr11:84419443-84581292 | 0.16 | intron 7 | unknown | 0 cnv | inherited from a mother of unknown phenotype | NA | Cognitive impairment    |
| XX  | 300111 | del | chr11:84367238-84539665 | 0.17 | intron 7 | unknown | 0 cnv | inherited from a mother of unknown phenotype | NA | Intellectual disability |

Table S8: Summary of genetic and clinical descriptions of DECIPHER patients.

| Ref | Vulto-van Silfhout <i>et al.</i> Patient ID | CNV type | <i>DLG2</i> CNV hg19 coordinates | CNV size (Mb) | <i>DLG2</i> deleted features | Gender  | Other rare CNVs                                   | Inheritance of <i>DLG2</i> variant | Age of presentation | Clinical description      |
|-----|---------------------------------------------|----------|----------------------------------|---------------|------------------------------|---------|---------------------------------------------------|------------------------------------|---------------------|---------------------------|
| XXI | 1339                                        | del      | chr11:83595987-84489649          | 0.89          | exons 8-18                   | unknown | 1 cnv: 5Mbp dup on chr15; de novo. Several genes. | de novo constitutive               | NA                  | Mild ID, autism, epilepsy |

Table S9: Summary of genetic and clinical descriptions of Vulto-van Silfhout *et al.* patient.

| Ref                 | Literature Patient ID | CNV type | <i>DLG2</i> CNV hg19 coordinates | CNV size (Mb) | <i>DLG2</i> deleted features | Gender | Other rare CNVs                         | Inheritance of <i>DLG2</i> variant  | Age of presentation | Clinical description            |
|---------------------|-----------------------|----------|----------------------------------|---------------|------------------------------|--------|-----------------------------------------|-------------------------------------|---------------------|---------------------------------|
| Walsh <i>et al.</i> | L4                    | del      | chr11:84003321-84266329          | 0.26          | exons 8-9                    |        | NA                                      | unknown                             | 25                  | Schizophrenia                   |
| Xu <i>et al.</i>    | L5                    | del      | chr11:83945764-84214964          | 0.27          | exons 9-11                   | male   | NA                                      | inherited from an unaffected mother |                     | Schizophrenia                   |
| Kirov <i>et al.</i> | L6                    | del      | chr11:83795102-84165325          | 0.37          | exons 9-13                   |        | NA                                      | de novo constitutive                | 18                  | Schizophrenia                   |
| Kirov <i>et al.</i> | L7                    | del      | chr11:84328458-84548416          | 0.22          | intron 7                     |        | NA                                      | de novo constitutive                | 20                  | Schizophrenia                   |
| Noor <i>et al.</i>  | L8                    | del      | chr11:84143697-84312722          | 0.17          | exon 8                       |        | 1 cnv: 41kbp del on chr1. Gene: DNAJC6. | unknown                             |                     | Borderline personality disorder |
| Noor <i>et al.</i>  | L9                    | del      | chr11:84111384-84354568          | 0.24          | exon 8                       |        | 1 cnv: 23kbp dup on chr20. No gene.     | unknown                             |                     | Borderline personality disorder |

|                          |     |     |                         |       |            |        |    |                                        |  |               |
|--------------------------|-----|-----|-------------------------|-------|------------|--------|----|----------------------------------------|--|---------------|
| Nithian<br><i>et al.</i> | L11 | del | chr11:83961633-84633847 | 0.67  | exons 8-11 | male   | NA | inherited from an<br>unaffected mother |  | Schizophrenia |
| Nithian<br><i>et al.</i> | L13 | del | chr11:84375859-84521180 | 0.145 | intron 7   | female | NA | unknown                                |  | Schizophrenia |

Table S10: Summary of genetic and clinical descriptions of literature patients.

| CLINICAL SUMMARY    | PATIENT 1 (317136)<br>MALE                                                                                                                                                                                                                                                                                                                                                                                                                                                                                                                                                         | PATIENT 2 (317185)<br>MALE                                                                                                                                                                                                                                                                                                                                                                                                                                                                                                                                                     |
|---------------------|------------------------------------------------------------------------------------------------------------------------------------------------------------------------------------------------------------------------------------------------------------------------------------------------------------------------------------------------------------------------------------------------------------------------------------------------------------------------------------------------------------------------------------------------------------------------------------|--------------------------------------------------------------------------------------------------------------------------------------------------------------------------------------------------------------------------------------------------------------------------------------------------------------------------------------------------------------------------------------------------------------------------------------------------------------------------------------------------------------------------------------------------------------------------------|
| PRIMARY COMPLAINT   | <ul style="list-style-type: none"> <li>● developmental delay</li> </ul>                                                                                                                                                                                                                                                                                                                                                                                                                                                                                                            | <ul style="list-style-type: none"> <li>● developmental delay</li> </ul>                                                                                                                                                                                                                                                                                                                                                                                                                                                                                                        |
| AGE AT PRESENTATION | <ul style="list-style-type: none"> <li>● 3 years</li> </ul>                                                                                                                                                                                                                                                                                                                                                                                                                                                                                                                        | <ul style="list-style-type: none"> <li>● 1 year 5 months</li> </ul>                                                                                                                                                                                                                                                                                                                                                                                                                                                                                                            |
| PRESENT ILLNESS     | <ul style="list-style-type: none"> <li>● motor milestone delay: <ul style="list-style-type: none"> <li>– sitting: 17m</li> <li>– walking: 24m</li> </ul> </li> <li>● language delay: <ul style="list-style-type: none"> <li>– first words: 2y11m</li> <li>– first phrases: 3y11m</li> </ul> </li> <li>● repetitive gestures</li> <li>● social interaction deficit: <ul style="list-style-type: none"> <li>– excessive timidity but good visual contact</li> <li>– lack of participation in school activities, frequent crying</li> </ul> </li> <li>● executive slowness</li> </ul> | <ul style="list-style-type: none"> <li>● motor milestone mild delay: <ul style="list-style-type: none"> <li>– sitting: 8m</li> <li>– walking: 18m</li> </ul> </li> <li>● language delay: <ul style="list-style-type: none"> <li>– first words: 18m</li> <li>– first phrases: 5y</li> </ul> </li> <li>● rhythmic movements of the trunk</li> <li>● social interaction deficit: <ul style="list-style-type: none"> <li>– lack of visual contact</li> <li>– lack of facial expression</li> <li>– lack of exploratory behavior</li> </ul> </li> <li>● general hypotonia</li> </ul> |
| PAST HISTORY        | <ul style="list-style-type: none"> <li>● Obstetric <ul style="list-style-type: none"> <li>● pregnancy without incident</li> <li>● full term delivery</li> </ul> </li> <li>● Medical <ul style="list-style-type: none"> <li>● birth without incident</li> <li>● normal birth weight</li> <li>● normal sleep and eating habits</li> <li>● recurrent otitis media</li> <li>● around 18 months: episode of loss of contact and deviation of the mouth during 10-15 minutes; spontaneous resolution without recurrence</li> </ul> </li> </ul>                                           | <ul style="list-style-type: none"> <li>● pregnancy without incident</li> <li>● full term delivery</li> <li>● apparent rigidity at birth (Apgar scores 7,8,10)</li> <li>● normal birth weight</li> <li>● congenital microcephaly</li> <li>● normal sleep and eating habits</li> <li>● recurrent otitis media with bilateral tympanic tube insertion</li> <li>● bilateral hypermetropia</li> </ul>                                                                                                                                                                               |
| FAMILY HISTORY      | <ul style="list-style-type: none"> <li>● born to healthy unrelated adults</li> <li>● 3rd child in a sibship of three</li> <li>● two older asymptomatic female siblings</li> </ul>                                                                                                                                                                                                                                                                                                                                                                                                  | <ul style="list-style-type: none"> <li>● born to healthy unrelated adults</li> <li>● 2nd child in a sibship of three</li> <li>● one older and one younger asymptomatic male sibling</li> </ul>                                                                                                                                                                                                                                                                                                                                                                                 |

|                                                                                                                                                                                                    |                                                                                                                                                                                                                             |                                                                                                                                                                                                                                                                                      |
|----------------------------------------------------------------------------------------------------------------------------------------------------------------------------------------------------|-----------------------------------------------------------------------------------------------------------------------------------------------------------------------------------------------------------------------------|--------------------------------------------------------------------------------------------------------------------------------------------------------------------------------------------------------------------------------------------------------------------------------------|
| PHYSICAL FINDINGS                                                                                                                                                                                  | <ul style="list-style-type: none"> <li>• normal neurological examination</li> <li>• no dysmorphic features</li> <li>• no cutaneous abnormalities</li> </ul>                                                                 | <ul style="list-style-type: none"> <li>• microcephaly (HC &lt; P3)</li> <li>• generalized hypotonia, no other abnormal neurological findings</li> <li>• low-set right ear with under-folded helix</li> <li>• no cutaneous abnormalities</li> </ul>                                   |
| ADDITIONAL FINDINGS <ul style="list-style-type: none"> <li>• Auditory Testing</li> <li>• CNS Evoked Potentials</li> <li>• Overnight EEG</li> <li>• Head MRI</li> <li>• Metabolic Workup</li> </ul> | <ul style="list-style-type: none"> <li>• No significant conduction deficit</li> <li>• BAER: no abnormal findings</li> <li>• no abnormal findings</li> <li>• no abnormal findings</li> <li>• no abnormal findings</li> </ul> | <ul style="list-style-type: none"> <li>• No significant conduction deficit</li> <li>• BAER: no abnormal findings</li> <li>• SEP: delayed spinal cord brainstem transmission</li> <li>• no abnormal findings</li> <li>• small cranial size</li> <li>• no abnormal findings</li> </ul> |
| GENETIC TESTING <ul style="list-style-type: none"> <li>• Proband Microarray CGH</li> <li>• Parental Microarray CGH</li> </ul>                                                                      | <ul style="list-style-type: none"> <li>• 523kbp deletion at band 11q14.1 including <i>DLG2</i></li> <li>• deletion present in asymptomatic female parent</li> </ul>                                                         | <ul style="list-style-type: none"> <li>• 463kbp deletion at band 11q14.1 including <i>DLG2</i></li> <li>• deletion present in asymptomatic female parent</li> </ul>                                                                                                                  |
| COGNITIVE TESTING <ul style="list-style-type: none"> <li>• WPPSI-R</li> </ul>                                                                                                                      | <ul style="list-style-type: none"> <li>• 65 (age of 6)</li> </ul>                                                                                                                                                           | <ul style="list-style-type: none"> <li>• 62 (age of 6)</li> </ul>                                                                                                                                                                                                                    |
| CLINICAL DEVELOPMENT                                                                                                                                                                               | <ul style="list-style-type: none"> <li>• persistent developmental delay despite cognitive and motor progress:           <ul style="list-style-type: none"> <li>– diagnosis of mild ID</li> </ul> </li> </ul>                | <ul style="list-style-type: none"> <li>• persistent developmental delay despite cognitive and motor progress:           <ul style="list-style-type: none"> <li>– diagnosis of mild ID</li> </ul> </li> </ul>                                                                         |

Table S11: Clinical description of ULB patients.



| seqnames | start    | end      | variantaccession |
|----------|----------|----------|------------------|
| chr11    | 84556678 | 84593655 | esv2759844       |
| chr11    | 84555145 | 84555203 | esv1506583       |
| chr11    | 84536933 | 84571495 | nsv8849          |
| chr11    | 84536635 | 84571784 | nsv468767        |
| chr11    | 84267185 | 84345829 | nsv468766        |
| chr11    | 84160786 | 84255107 | nsv508642        |
| chr11    | 84541974 | 84577299 | esv2760388       |
| chr11    | 84541974 | 84577299 | esv2760388       |
| chr11    | 84206126 | 84239486 | esv2761687       |
| chr11    | 84349593 | 84371598 | esv2761689       |
| chr11    | 84530538 | 84571784 | dgv2039n54       |
| chr11    | 84267185 | 84345829 | nsv555614        |
| chr11    | 84537700 | 84570874 | esv2673432       |
| chr11    | 84537700 | 84570874 | esv2673432       |
| chr11    | 84094401 | 84098289 | esv2664740       |
| chr11    | 84213153 | 84213373 | esv2744840       |
| chr11    | 84213273 | 84213455 | esv2740842       |
| chr11    | 84554999 | 84555317 | esv2744842       |
| chr11    | 84213153 | 84213373 | esv2744840       |
| chr11    | 84554999 | 84555317 | esv2744842       |
| chr11    | 84555118 | 84555257 | esv2744844       |
| chr11    | 84554999 | 84555317 | esv2744842       |
| chr11    | 84555022 | 84555163 | esv2744843       |
| chr11    | 84213153 | 84213373 | esv2744840       |

Table S12: DGV deletions overlapping *DLG2* 7-9 region (hg19).

| seqnames | start    | end      |
|----------|----------|----------|
| chr11    | 83965527 | 84120008 |
| chr11    | 83965910 | 84045055 |
| chr11    | 84018549 | 84027950 |
| chr11    | 84029240 | 84051838 |
| chr11    | 84046978 | 84095887 |
| chr11    | 84094421 | 84098238 |
| chr11    | 84101233 | 84122523 |
| chr11    | 84110959 | 84115246 |
| chr11    | 84135802 | 84196003 |
| chr11    | 84136420 | 84230443 |
| chr11    | 84189137 | 84228421 |
| chr11    | 84472654 | 84509360 |
| chr11    | 84490026 | 84507903 |
| chr11    | 84537679 | 84570855 |
| chr11    | 84575564 | 84625713 |

Table S13: Deletions overlapping *DLG2* 7-9 region from the 1000 Genome Project [10].

| id  | start    | end      | id  | start    | end      | id  | start    | end      | id | start    | end      |
|-----|----------|----------|-----|----------|----------|-----|----------|----------|----|----------|----------|
| 208 | 83166048 | 83170967 | 156 | 84058581 | 84059194 | 104 | 84213611 | 84217237 | 52 | 84835578 | 84835890 |
| 207 | 83173045 | 83173136 | 155 | 84059345 | 84060015 | 103 | 84217475 | 84219428 | 51 | 84836103 | 84838280 |
| 206 | 83175111 | 83175718 | 154 | 84062879 | 84063896 | 102 | 84219616 | 84220940 | 50 | 84838340 | 84845118 |
| 205 | 83177751 | 83177860 | 153 | 84065823 | 84066380 | 101 | 84221712 | 84223461 | 49 | 84845822 | 84854674 |
| 204 | 83179308 | 83179849 | 152 | 84066660 | 84067047 | 100 | 84223737 | 84224035 | 48 | 84856693 | 84858878 |
| 203 | 83180244 | 83180416 | 151 | 84070032 | 84070848 | 99  | 84224424 | 84224738 | 47 | 84859057 | 84860998 |
| 202 | 83182669 | 83182770 | 150 | 84071116 | 84071820 | 98  | 84225244 | 84225497 | 46 | 84861180 | 84863284 |
| 201 | 83183770 | 83183820 | 149 | 84076884 | 84077092 | 97  | 84226681 | 84226927 | 45 | 84863511 | 84865137 |
| 200 | 83184305 | 83184592 | 148 | 84077414 | 84077630 | 96  | 84228196 | 84237624 | 44 | 84865296 | 84865695 |
| 199 | 83185017 | 83185805 | 147 | 84078295 | 84078975 | 95  | 84238051 | 84244873 | 43 | 84984025 | 84984288 |
| 198 | 83187271 | 83190905 | 146 | 84080571 | 84081177 | 94  | 84245003 | 84246142 | 42 | 84987520 | 84987853 |
| 197 | 83191000 | 83204351 | 145 | 84081609 | 84081947 | 93  | 84246654 | 84247009 | 41 | 84987978 | 84988346 |
| 196 | 83204621 | 83209700 | 144 | 84088041 | 84088247 | 92  | 84247445 | 84247890 | 40 | 84991578 | 84991656 |
| 195 | 83209810 | 83210787 | 143 | 84089175 | 84089801 | 91  | 84251408 | 84251808 | 39 | 84991734 | 84991853 |
| 194 | 83211072 | 83214376 | 142 | 84089896 | 84090165 | 90  | 84252628 | 84252865 | 38 | 84995412 | 84995764 |
| 193 | 83214521 | 83218447 | 141 | 84090335 | 84091083 | 89  | 84253177 | 84253615 | 37 | 84996264 | 84997264 |
| 192 | 83218888 | 83219296 | 140 | 84091252 | 84091470 | 88  | 84254099 | 84254323 | 36 | 84997401 | 84998256 |
| 191 | 83219588 | 83221251 | 139 | 84091803 | 84092282 | 87  | 84255125 | 84256635 | 35 | 84998318 | 84999222 |
| 190 | 83221426 | 83221873 | 138 | 84092742 | 84092797 | 86  | 84257112 | 84258026 | 34 | 85000366 | 85001342 |
| 189 | 83222130 | 83222748 | 137 | 84097510 | 84098321 | 85  | 84258881 | 84259162 | 33 | 85001626 | 85002207 |
| 188 | 83222966 | 83223560 | 136 | 84098518 | 84100348 | 84  | 84262647 | 84263094 | 32 | 85005026 | 85005065 |
| 187 | 83223753 | 83224949 | 135 | 84100776 | 84102495 | 83  | 84264446 | 84264958 | 31 | 85005860 | 85007593 |
| 186 | 83225397 | 83226075 | 134 | 84102893 | 84103156 | 82  | 84265477 | 84266174 | 30 | 85007982 | 85008436 |
| 185 | 83228068 | 83228369 | 133 | 84103209 | 84104310 | 81  | 84267001 | 84268568 | 29 | 85009217 | 85011638 |
| 184 | 83228726 | 83243827 | 132 | 84106764 | 84107098 | 80  | 84268842 | 84272965 | 28 | 85013280 | 85016016 |
| 183 | 83252725 | 83252901 | 131 | 84107221 | 84110282 | 79  | 84273114 | 84273398 | 27 | 85016790 | 85019888 |
| 182 | 83344254 | 83344908 | 130 | 84111158 | 84111673 | 78  | 84273961 | 84280534 | 26 | 85020029 | 85020067 |
| 181 | 83391321 | 83391808 | 129 | 84113217 | 84113679 | 77  | 84280850 | 84282212 | 25 | 85020741 | 85023331 |
| 180 | 83393201 | 83393486 | 128 | 84116119 | 84116369 | 76  | 84282492 | 84286266 | 24 | 85023608 | 85031436 |
| 179 | 83447540 | 83447829 | 127 | 84116797 | 84117004 | 75  | 84286479 | 84288497 | 23 | 85031550 | 85033747 |
| 178 | 83451567 | 83452219 | 126 | 84119088 | 84119335 | 74  | 84288789 | 84289789 | 22 | 85033811 | 85037720 |
| 177 | 83468595 | 83468950 | 125 | 84119593 | 84121395 | 73  | 84291490 | 84292423 | 21 | 85039780 | 85040387 |
| 176 | 83470152 | 83470423 | 124 | 84122366 | 84128658 | 72  | 84293736 | 84295467 | 20 | 85041894 | 85043701 |
| 175 | 83476547 | 83476813 | 123 | 84129031 | 84129559 | 71  | 84295891 | 84297686 | 19 | 85050723 | 85051908 |
| 174 | 83488800 | 83489038 | 122 | 84129677 | 84130047 | 70  | 84297877 | 84302215 | 18 | 85052711 | 85053919 |
| 173 | 83496824 | 83497126 | 121 | 84130154 | 84131269 | 69  | 84303202 | 84303573 | 17 | 85054113 | 85057436 |
| 172 | 83497733 | 83497835 | 120 | 84132374 | 84135688 | 68  | 84305217 | 84307263 | 16 | 85057632 | 85058729 |
| 171 | 83544657 | 83544813 | 119 | 84135770 | 84136486 | 67  | 84307470 | 84311097 | 15 | 85061297 | 85066111 |
| 170 | 83585463 | 83585531 | 118 | 84136632 | 84137616 | 66  | 84311615 | 84330226 | 14 | 85066192 | 85088840 |
| 169 | 83641371 | 83641526 | 117 | 84138299 | 84138544 | 65  | 84330332 | 84330884 | 13 | 85088961 | 85119171 |
| 168 | 83673928 | 83674066 | 116 | 84138850 | 84139120 | 64  | 84331032 | 84336001 | 12 | 85119623 | 85121383 |
| 167 | 83676367 | 83676511 | 115 | 84139281 | 84140797 | 63  | 84336063 | 84337949 | 11 | 85121462 | 85163989 |
| 166 | 83691549 | 83691686 | 114 | 84141500 | 84142049 | 62  | 84338067 | 84352990 | 10 | 85164071 | 85173498 |
| 165 | 83770358 | 83770527 | 113 | 84143140 | 84143589 | 61  | 84353142 | 84373352 | 9  | 85173630 | 85175979 |
| 164 | 83809966 | 83810090 | 112 | 84143852 | 84144837 | 60  | 84373667 | 84376890 | 8  | 85176114 | 85191724 |
| 163 | 83874504 | 83874554 | 111 | 84145382 | 84145919 | 59  | 84377059 | 84422387 | 7  | 85191837 | 85194932 |
| 162 | 83962281 | 83962335 | 110 | 84146499 | 84155193 | 58  | 84422484 | 84425704 | 6  | 85195320 | 85204708 |
| 161 | 84027868 | 84028380 | 109 | 84157412 | 84160769 | 57  | 84425769 | 84827382 | 5  | 85204888 | 85214258 |
| 160 | 84055925 | 84056266 | 108 | 84161142 | 84162397 | 56  | 84827560 | 84831598 | 4  | 85214442 | 85244495 |
| 159 | 84056574 | 84056836 | 107 | 84164038 | 84168890 | 55  | 84831661 | 84832309 | 3  | 85244553 | 85293677 |
| 158 | 84057339 | 84057700 | 106 | 84168981 | 84209505 | 54  | 84832665 | 84833789 | 2  | 85294291 | 85309833 |
| 157 | 84058130 | 84058491 | 105 | 84209940 | 84212795 | 53  | 84834817 | 84835404 | 1  | 85337643 | 85339790 |

Table S14: Fetal brain de novo transcriptome assembly coordinates of *DLG2* (antisense gene). They are coordinate of the exons belonging to the middle panel in Figure S54.

| id  | start    | end      | 3'-end | 5'-end | UCSC       |
|-----|----------|----------|--------|--------|------------|
| 208 | 83166048 | 83170967 | +      | =      | 34         |
| 207 | 83173045 | 83173136 | -      | =      | 33         |
| 205 | 83177751 | 83177860 | =      | =      | 32         |
| 203 | 83180244 | 83180416 | =      | =      | 31         |
| 202 | 83182669 | 83182770 | =      | =      | 30         |
| 201 | 83183770 | 83183820 | =      | =      | 29         |
| 197 | 83191000 | 83204351 | +      | +      | 28, 27, 26 |
| 184 | 83228726 | 83243827 | +      | +      | 25         |
| 183 | 83252725 | 83252901 | =      | =      | 24         |
| 182 | 83344254 | 83344908 | -      | +      | 23         |
| 180 | 83393201 | 83393486 | =      | +      | 22         |
| 172 | 83497733 | 83497835 | -      | =      | 21         |
| 171 | 83544657 | 83544813 | =      | =      | 20         |
| 170 | 83585463 | 83585531 | =      | =      | 19         |
| 169 | 83641371 | 83641526 | =      | =      | 18         |
| 168 | 83673928 | 83674066 | =      | =      | 17         |
| 167 | 83676367 | 83676511 | =      | =      | 16         |
| 166 | 83691549 | 83691686 | =      | +      | 15         |
| 165 | 83770358 | 83770527 | =      | =      | 14         |
| 164 | 83809966 | 83810090 | =      | =      | 13         |
| 163 | 83874504 | 83874554 | =      | =      | 12         |
| 162 | 83962281 | 83962335 | =      | +      | 11         |
| 161 | 84027868 | 84028380 | =      | -      | 9          |
| 94  | 84245003 | 84246142 | +      | +      | 8          |
| 57  | 84425769 | 84827382 | +      | +      | 7, 6       |
| 44  | 84865296 | 84865695 | +      | =      | 5          |
| 37  | 84996264 | 84997264 | =      | +      | 4          |
| 2   | 85294291 | 85309833 | +      | +      | 3          |
| 1   | 85337643 | 85339790 | -      | +      | 2, 1       |

Table S15: Fetal brain de novo (DN) transcriptome assembly coordinates overlapping with UCSC exons. *id*, *start*, *end* columns refer to the DN transcriptome; *UCSC* columns report the exon number as defined in Table S1. With respect to the directionality of the gene transcription, *3'-end* describes whether the DN exon 3'-end is before (-), after (+) or coincides (=) the UCSC one, *5'-end* describes whether the DN exon 5'-end is before (+), after (-) or coincides (=) the UCSC one. For example, the DN exon 197 has its 3'-end (83191000) after the UCSC exon 28 3'-end (83191415) (*3'-end*: +) and has its 5'-end (83204351) before the UCSC exon 26 5'-end (83195271) (*5'-end*: +). Remember that the words “before” and “after” are used in the context of transcription directionality and not genomic coordinates, and *DLG2* is an antisense gene.

| id  | start    | end      | 3'-end | 5'-end | Ensembl        |
|-----|----------|----------|--------|--------|----------------|
| 208 | 83166048 | 83170967 | +      | =      | 47             |
| 207 | 83173045 | 83173136 | -      | -      | 46             |
| 205 | 83177751 | 83177860 | =      | =      | 45             |
| 203 | 83180244 | 83180416 | =      | =      | 44             |
| 202 | 83182669 | 83182770 | =      | =      | 43             |
| 201 | 83183770 | 83183820 | =      | =      | 42             |
| 197 | 83191000 | 83204351 | +      | +      | 41, 40, 39, 38 |
| 184 | 83228726 | 83243827 | +      | +      | 37             |
| 183 | 83252725 | 83252901 | =      | =      | 36             |
| 182 | 83344254 | 83344908 | -      | +      | 35             |
| 180 | 83393201 | 83393486 | =      | +      | 32             |
| 172 | 83497733 | 83497835 | -      | =      | 29             |
| 171 | 83544657 | 83544813 | =      | =      | 28             |
| 170 | 83585463 | 83585531 | =      | =      | 27             |
| 169 | 83641371 | 83641526 | =      | =      | 26             |
| 168 | 83673928 | 83674066 | =      | =      | 25             |
| 167 | 83676367 | 83676511 | =      | =      | 24             |
| 166 | 83691549 | 83691686 | =      | +      | 23             |
| 165 | 83770358 | 83770527 | =      | =      | 22             |
| 164 | 83809966 | 83810090 | =      | =      | 21             |
| 163 | 83874504 | 83874554 | =      | =      | 20             |
| 162 | 83962281 | 83962335 | =      | +      | 18             |
| 161 | 84027868 | 84028380 | =      | -      | 15             |
| 110 | 84146499 | 84155193 | +      | +      | 14             |
| 94  | 84245003 | 84246142 | +      | +      | 13             |
| 59  | 84377059 | 84422387 | +      | +      | 12             |
| 57  | 84425769 | 84827382 | +      | +      | 11, 10         |
| 50  | 84838340 | 84845118 | +      | +      | 9              |
| 44  | 84865296 | 84865695 | +      | =      | 8              |
| 37  | 84996264 | 84997264 | =      | +      | 7              |
| 8   | 85176114 | 85191724 | +      | +      | 6              |
| 4   | 85214442 | 85244495 | +      | +      | 5              |
| 2   | 85294291 | 85309833 | +      | +      | 4              |
| 1   | 85337643 | 85339790 | -      | +      | 2, 1           |

Table S16: Fetal brain de novo (DN) transcriptome assembly coordinates overlapping with Ensembl exons. Same application of Table S15.

| HPO phenotype name                      |
|-----------------------------------------|
| Intellectual disability, mild           |
| Intellectual disability                 |
| Intellectual disability, profound       |
| Intellectual disability, moderate       |
| Intellectual disability, progressive    |
| Intellectual disability, borderline     |
| Intellectual disability, severe         |
| Global developmental delay              |
| Mild global developmental delay         |
| Moderate global developmental delay     |
| Severe global developmental delay       |
| Delayed speech and language development |
| Autism                                  |
| Autism spectrum disorder                |
| Autistic behavior                       |
| Autism with high cognitive abilities    |
| Expressive language delay               |
| Language impairment                     |
| Dysphasia                               |
| Specific learning disability            |
| Seizures                                |
| Generalized seizures                    |
| Generalized tonic-clonic seizures       |
| Cognitive impairment                    |
| Stereotypic behavior                    |
| Epileptic encephalopathy                |
| Abnormality of higher mental function   |
| Behavioural/Psychiatric Abnormality     |
| Behavioural/psychiatric abnormality     |
| Psychosis                               |

Table S17: Selected HPO phenotypes for neurodevelopmental disorders.

| Brain tissue list from FANTOM5 dataset |
|----------------------------------------|
| substantia nigra                       |
| hippocampus                            |
| cerebellum                             |
| amygdala                               |
| medial temporal gyrus                  |
| pineal gland                           |
| insula                                 |
| pituitary gland                        |
| parietal lobe                          |
| medial frontal gyrus                   |
| frontal lobe                           |
| paracentral gyrus                      |
| brain                                  |
| nucleus accumbens                      |
| postcentral gyrus                      |
| occipital lobe                         |
| pons                                   |
| locus coeruleus                        |
| medulla oblongata                      |
| temporal lobe                          |
| parietal cortex                        |
| occipital pole                         |
| occipital cortex                       |
| cerebral meninges                      |
| spinal cord                            |
| caudate nucleus                        |
| putamen                                |
| corpus callosum                        |
| globus pallidus                        |
| iPS differentiation to neuron          |

Table S18: Brain tissue list from FANTOM5 dataset, downloaded from UCSC.

| Tissue (ENCODE ID)           | BAM file name                                            |
|------------------------------|----------------------------------------------------------|
| Cerebellum (ENCSR000AEW)     | ENCFF113PDT<br>ENCFF513CAU<br>ENCFF602BYA<br>ENCFF753KWK |
| Diencephalon (ENCSR000AEX)   | ENCFF226SQK<br>ENCFF331ZDV<br>ENCFF391XTO<br>ENCFF677URC |
| Frontal cortex (ENCSR000AEY) | ENCFF220QDT<br>ENCFF741AGL<br>ENCFF803AAV<br>ENCFF907ILS |
| Occipital lobe (ENCSR000AFD) | ENCFF229XLD<br>ENCFF397QLJ<br>ENCFF746HOG                |
| Parietal lobe (ENCSR000AFE)  | ENCFF041THY<br>ENCFF243QVH<br>ENCFF434OIG<br>ENCFF892QFE |
| Temporal lobe (ENCSR000AFJ)  | ENCFF286ZEF<br>ENCFF633PEY<br>ENCFF927WKN<br>ENCFF954GHY |

Table S19: Fetal brain BAM file names and their corresponding tissues and ENCODE ID.

| Tissue (ENCODE ID)      | BAM file name              |
|-------------------------|----------------------------|
| Midbrain (ENCSR255SDF)  | ENCFF188SSW<br>ENCFF411UVC |
| Forebrain (ENCSR723SZV) | ENCFF203VYY<br>ENCFF965MHF |
| Hindbrain (ENCSR749BAG) | ENCFF172HHP<br>ENCFF772VMM |

Table S20: Mouse newborn brain BAM file names and their corresponding tissues and ENCODE ID.

| #  | chr   | start     | end       | width | gene name        | CEGA score | ss start            | ss end              | type    |
|----|-------|-----------|-----------|-------|------------------|------------|---------------------|---------------------|---------|
| 1  | chr1  | 7763249   | 7766656   | 3408  | <i>CAMTA1</i>    | NA         | 7764954             | 7764955             | N       |
| 2  | chr1  | 17239490  | 17242407  | 2918  | <i>CROCC</i>     | NA         | 17240632            | 17240633            | N       |
| 3  | chr1  | 93248904  | 93251568  | 2665  | <i>EVI5</i>      | NA         | 93250392            | 93250393            | P       |
| 4  | chr1  | 147717397 | 147718316 | 920   | <i>NBPF8</i>     | NA         | 147718153           | 147718154           | N       |
| 5  | chr1  | 204318719 | 204320752 | 2034  | <i>PLEKHA6</i>   | 144        | 204320007           | 204320008           | N       |
| 6  | chr2  | 236577649 | 236583540 | 5892  | <i>AGAP1</i>     | 31         | 236579701           | 236579702           | P       |
| 7  | chr3  | 11759850  | 11761105  | 1256  | <i>VGLL4</i>     | NA         | 11760890            | 11760891            | P       |
| 8  | chr3  | 114167766 | 114174803 | 7038  | <i>ZBTB20</i>    | 832        | 114173425           | 114173426           | P       |
| 9  | chr4  | 183368933 | 183373052 | 4120  | <i>TENM3</i>     | NA         | 183370236;183370567 | 183370237;183370568 | P;N     |
| 10 | chr4  | 1240956   | 1242536   | 1581  | <i>CTBP1</i>     | NA         | 1242448             | 1242449             | P       |
| 11 | chr4  | 176812194 | 176813234 | 1041  | <i>GPM6A</i>     | NA         | 176812613           | 176812614           | P and E |
| 12 | chr5  | 14440397  | 14444098  | 3702  | <i>TRIO</i>      | 192        | 14441469            | 14441470            | P       |
| 13 | chr5  | 58722748  | 58727155  | 4408  | <i>PDE4D</i>     | 300        | 58726119            | 58726120            | N       |
| 14 | chr7  | 75266093  | 75269827  | 3735  | <i>HIP1</i>      | 144        | 75268368            | 75268369            | N       |
| 15 | chr7  | 143577564 | 143580388 | 2825  | <i>FAM115A</i>   | NA         | 143579015;143579828 | 143579016;143579829 | E;P     |
| 16 | chr8  | 12808153  | 12813083  | 4931  | <i>KIAA1456</i>  | NA         | 12809867            | 12809868            | P and E |
| 17 | chr8  | 145686236 | 145688964 | 2729  | <i>CYHR1</i>     | 56         | 145687665           | 145687666           | P       |
| 18 | chr9  | 20683184  | 20685987  | 2804  | <i>FOCAD</i>     | 41         | 20684292            | 20684293            | P       |
| 19 | chr10 | 13387098  | 13389957  | 2860  | <i>SEPHS1</i>    | NA         | 13389276            | 13389277            | P       |
| 20 | chr11 | 84147024  | 84149361  | 2338  | <i>DLG2</i>      | 557        | 84148430            | 84148431            | P       |
| 21 | chr11 | 84429842  | 84432885  | 3044  | <i>DLG2</i>      | 97         | 84431338            | 84431339            | N       |
| 22 | chr11 | 84843131  | 84844944  | 1814  | <i>DLG2</i>      | 862        | 84843811            | 84843812            | P       |
| 23 | chr16 | 53163420  | 53165233  | 1814  | <i>CHD9</i>      | NA         | 53164970            | 53164971            | P       |
| 24 | chr16 | 49888603  | 49890008  | 1406  | <i>ZNF423</i>    | 65         | 49889645            | 49889646            | P       |
| 25 | chr17 | 61227923  | 61231987  | 4065  | <i>TANC2</i>     | 194        | 61228741            | 61228742            | E       |
| 26 | chr17 | 56708405  | 56710156  | 1752  | <i>TEX14</i>     | NA         | 56708994            | 56708995            | N       |
| 27 | chr21 | 17790619  | 17798315  | 7697  | <i>LINC00478</i> | NA         | 17792061;17792892   | 17792062;17792893   | P;P     |
| 28 | chr22 | 28832791  | 28840308  | 7518  | <i>TTC28</i>     | 553        | 28838873            | 28838874            | P       |
| 29 | chr22 | 36355185  | 36358538  | 3354  | <i>RBFOX2</i>    | NA         | 36357610            | 36357611            | P       |

Table S21: Intronic regions harbouring putative novel promoters, detected by the knowledge-driven genome-wide analysis. *CEGA score* documents the conservation score across vertebrates as reported in Conserved Elements from Genomics Alignments database [11]. *ss start* and *ss end* represent the coordinate of the detected splicing site. Column *type* reports whether such region is predicted as promoter (P) or exon (E) by Ensembl (archive 75, feb 2014), or novel (N); entries 9, 15 and 27 includes two detected splicing site, while entries 11 and 16 the is predicted as either an exon or a promoter. Coordinates are in hg19.



| Name   | Position                |
|--------|-------------------------|
| CAGE10 | chr11:84148565-84148597 |
| CAGE09 | chr11:84148598-84148663 |
| CAGE08 | chr11:84148843-84148867 |
| CAGE07 | chr11:84148869-84148881 |
| CAGE06 | chr11:84431432-84431459 |
| CAGE05 | chr11:84431459-84431498 |
| CAGE04 | chr11:84431757-84431819 |
| CAGE03 | chr11:84431828-84431834 |
| CAGE02 | chr11:84431891-84431908 |
| CAGE01 | chr11:84431943-84431992 |

Table S22: FANTOM5 robust CAGE peaks coordinates in HPs.

# Supplementary Note 1

## Genome-wide statistical assessment of HPs

We assessed the statistical significance of HPs, as linked to NDDs, by employing DECIPHER and GDD/ID cohorts in a genome-wide analysis using two strategies: a data-driven approach, checking up on other statistically enriched intronic regions, and a knowledge-driven approach, which is based on functional data known to be associated with promoters (Figures S86 and S87 report an overview of the analyses designs). Because DECIPHER enlists a broad spectrum of diseases, we name DECIPHER NDD the subset of DECIPHER patients with NDD phenotypes (Table S17 for the list of selected HPO phenotypes). The collection of DECIPHER NDD and GDD/ID case patients represents hereafter our case cohort; while the collection of DGV and GDD/ID control patients represents hereafter our control cohorts. For both cohorts, we only considered deletions. Because DGV dataset version of July 2015 also includes GDD/ID control patients, we remove the latter from the former, resulting in two disjoint populations and in 11987 individuals in DGV.

It is difficult to assess any gene-diseases association whenever deletions involve multiple genes. For such reason, we filtered out any aberration affecting multiple genes in the cases, while we left unaltered the controls. The result is a selection of 6023 patients with NDD phenotype(s) and harbouring some (1 or more) monogenic deletions; and a total of 31571 control individuals harbouring deletions: 11987 from DGV and 19584 from GDD/ID control cohorts using the *alternative* approach (see Supplementary Note 2 for the introduction of *alternative* and *traditional* approaches).

Using such cohorts, we identified 293186 intronic Smallest Regions of Overlap (SROs), defined as disjoint ranges of the overlapping deletions in both cohorts (Figure S56). Note that, at this stage, some SROs might overlap only control CNVs; these SROs will be filtered out by the enrichment analysis. In the data-driven approach, we inspect for SRO-NDD association by means of a two-step approach: first, a statistical assessment of the enrichment of cases over controls (see Supplementary Note 2), and, second, a visual inspection of the enriched regions using functional and genotypic-phenotypic datasets. This latter step is required in order to provide a biological explanation of the link between SRO and NDDs. Without context, some SROs results could be relevant only because the deletions overlapping the intronic regions also affect the nearby exons. In such scenario, one can conservatively assume exons to account for the disease, therefore making the intronic SRO a false positive. To avoid such false positives, we defined the relevance of intronic SROs for NDDs using two criteria: the intronic SRO enrichment of cases over controls using one-tailed Fisher's exact test is statistically significant ( $p$ -value  $< 0.01$ , after Bonferroni correction), and the resulting intronic  $p$ -value is 10x smaller than  $p$ -value calculated from the nearby exons (see Supplementary Note 2). All the resulting  $p$ -value significant SROs turned out false positives after manual inspection, due to the impossibility of providing a biological explanation of the region using ENCODE (fetal brain BAM files), Roadmap Epigenomics (NPC/fetal/adult brain) and FANTOM5 functional datasets (data not shown). Using the *traditional* approach, we got equivalent results.

We further screened the genome for promoters using a knowledge-driven strategy focused on introns. Among the overall 293186 SROs, we looked for the intronic regions that share the most similar functional profile to HPin7 and HPin8, i.e., a promoter profile. We began our genome-wide analysis by integrating Roadmap Epigenomics, ENCODE, FANTOM5 and TFs independent datasets. Considering the H3K4me3 regions overlapping any SRO, four criterias shaped our definition of intronic brain promoter: the presence of both TF binding sites and CAGE peaks, a H3K4me3/H3K4me1 peak ratio greater than one and the existence of a splicing site found in at least half of the fetal brain BAM files. We established the presence of splicing sites whenever the difference in reads coverage, of two adjacent nucleotides, was higher than a certain threshold (named hereafter *delta coverage*), in this case 20. It is worth noting that we searched for conserved or non-conserved regions, because some intronic promoters might be specific for the human brain. This genome-wide analysis resulted in the discovery of 29 intronic promoters: 21 predicted by Ensembl and 8 novels (Table S21). High level transcription and sharp splicing sites located in H3K4me3 peak regions are easily visualized in the fetal brain BAM files (see Figures S57 to S85). Table 3 (article) lists the 11 intronic promoters found deleted in NDD patients (Figure 6, article, and see Additional file 2). Both *DLG2* HPin7 and HPin8 are enriched in NDD cases versus controls in a statistically significant manner ( $p$ -value  $< 0.05$  after Bonferroni correction, see Table 3, article); the other 9 have a greater number of case than control patients (normalized by the cohort sizes: 6023 cases and the sum of DGV and GDD/ID control individuals, 31571). Comparing the 29 intronic promoters, ten of the eleven deleted promoters are evolutionary conserved, in comparison to the 4 of the 18 remaining (one-tailed Fisher's exact test,  $p$ -value is  $4.445 \cdot 10^{-04}$ ).

Regarding the association between HPs and NDDs, while the multiple hypotheses correction in the first strategy causes also HPs to be false positive, because of the high number of hypotheses tested (20767), in the

second approach HPs are still statistical significant due to the low number of hypotheses tested (11).

## Supplementary Note 2

### Data-driven analysis: cohorts

The data-driven analysis workflow includes the following steps: cohorts conception, identification of regions of interest (SROs in our case), statistical analysis (one-tailed Fisher's exact test), statistical correction due to multiple hypothesis testing (Bonferroni) and, finally, visual inspection of the candidate regions. As described in "Patients and Controls CNV datasets" section (main article), we retrieved DGV and GDD/ID datasets from UCSC. We wanted to have two independent control cohorts for the statistical analysis, hence, as preprocessing step, we pulled GDD/ID CNVs out of July 2015 version of DGV.

The statistical analysis is based on the number of patients, rather than CNVs, in the cohorts. On the other hand, the patient (or sample) information is missing in 99413 (1.7% of the total) CNVs from DGV and 115630 (90.9% of the total) CNVs from GDD/ID control, hence different choices in the cohorts conception would affect the final outcome. There are two possible approaches: consider only CNVs with patient information and merge the two control cohorts, resulting in 13621 healthy patients, or consider only CNVs with patient information from DGV (11987) and all CNVs in GDD/ID control, knowing the number of patients, 19584 [6]. We performed both, and for convenience we name the first traditional approach (Figure S86), the second alternative approach (Figure S87). While in the former settings all genotype-phenotype datasets go through the same preprocessing steps, in the latter we deal with all CNVs at the cost of one approximation: although we pull duplications out of the dataset, the number of patients stays constant.

The statistical analysis is then performed, in the traditional approach, with two populations: 6023 cases, 13621 controls; in the alternative approach, with three populations: 6023 cases, 11987 DGV control patients, 19584 GDD/ID control patients. The SRO is enriched in NDD patients if the number of overlapping cases are statistically significant with respect to controls; regarding the alternative approach, such condition must hold for both DGV and GDD/ID control cohorts, independently.

### Data-driven analysis: SRO and exons

Every intronic Smallest Regions of Overlap (SROs, defined as disjoint ranges of the overlapping deletions in both cohorts, Figure S56) is surrounded by two exons and these three elements (individually or combined) could be important in understanding NDD. Hence, we measured four enrichments of cases over controls using one-tailed Fisher's exact test: the intronic SRO, the previous and next exons individually, and both exons combined. Therefore, the intronic SRO is deemed more relevant than its nearby exons if the following rules are matched: if deletions that affect the SRO also overlap both exons, then the SRO's p-value must be smaller than the other three p-values by a factor of 10; if deletions that affect the SRO also, and only, overlap the previous (next) exon, then the SRO's p-value must be smaller than the previous (next) exon's p-value by a factor of 10. Altogether, we opted for the following strict criteria: an intronic SRO is considered relevant when having its p-value significant by itself and smaller than the neighbor exons' p-values (by a factor of 10).

### Knowledge-driven analysis

For each putative promoters and first exons found in intronic regions and listed in Table 3 (main article), we evaluate their statistical significance using the alternative approach.

### Enrichment analysis

All statistical analysis have been performed using R software, version 3.2. In the knowledge-driven analysis, all p-values reported in Additional file 2, are adjusted via Bonferroni correction, with the total number of tested hypothesis of 11. In the data-driven strategy, before performing the statistical analysis, we selected the SROs where the number of case patients is greater than control individuals (normalized by the cohort size). The amount of selected SRO was 20767 or 16266, numbers used for the Bonferroni correction in both alternative and traditional data-driven analyses, respectively.

## Supplementary Note 3

We performed the cross-annotation and mapping of *DLG2/Dlg2* exons using DNA and AA sequences. There is an evident lack of cross-annotation between reference genomes and reviewed proteins available, between UCSC and UniProtKB/Swiss-Prot. For this reason we mapped the amino-acid sequence to the underlying exon considering: i) the ordering of information, ii) possible reading frames and iii) the synteny properties of orthologous genes in humans and mice. The results are reported here below for both organisms. The exon regions are from UCSC, while amino-acid sequences are from UniProtKB/Swiss-Prot.

Because some amino-acids might be the result of three nucleotides shared between two exons, we used the following annotation to represent this information: “e3-D” means the amino-acid “D” is shared between exon 3 and the current exon, similarly, “[S-e19” means amino-acid “S” is shared between the current exon and exon 19. Some exons might splice to two different exons, according to the isoform. We therefore represent this information as “[e11b—S-e12”, that says this exon continue to exon 11b without sharing any amino-acid, or continue to exon 12 and they share amino-acid “S”.

### UniProt *DLG2* protein mapping to exons

|            |                                                                                                                 |
|------------|-----------------------------------------------------------------------------------------------------------------|
| exon 3     | MGIFKSSLFQALL [D-e4                                                                                             |
| exon 4     | e3-D] IQEFYEVTLNLSQKSCEQKIEEANQVLQKWEKTSLLAPCHDRLQKSSE                                                          |
| exon 5     | LTDCSGSKENASCIEQNKENQSFENETDETTT                                                                                |
| exon 6     | QNQGRCPAQNCSEAPAWMPVHHCT                                                                                        |
| exon 7     | MFFACYCALRTNVK                                                                                                  |
| CFEin7_cds | MSPVVKDPDCFTPMICHCCKVACTNNTLSLMFGCK                                                                             |
| exon 8     | KYRYQDEDAHSDHSLPRLTHEVRGPELVHVSEKNLSQIENVHGYVVLQSHISPLK                                                         |
| CFEin8_cds | MFASIWYAKKLGRRFVHNARKAKSEK                                                                                      |
| exon 9     | MNAYLTKQHSCSRGSDGMDAVRSAPTLIRDAHCACGWQRNCQGLGYSSQTMPSSGPGG<br>PASNRTGGSSFNRTLWDSVRKSPHKTSTKKGKTCGEHCTCPHGWFSPAQ |
| exon 10    | MQRPSVSRAGENYQLLWDTIASLKQCEQAMQHAFIP                                                                            |
| exon 11    | ASPAPIIVNTDLDITIPY                                                                                              |
| exon 12    | VNGTEIEYEFEEITLER                                                                                               |
| exon 13    | GNSGLGFSIAGGTDNPHIGDDPGIFITKIIPGGAAAEDGRL [R-e14                                                                |
| exon 14    | e13-R] VNDCILRVNEVDVSEVSHSKAVEALKEAGSIVRLYVRRRRPILETVVEIKLFKGP [G-e15                                           |
| exon 15    | e14-G] LGFSIAGGVGNQHIPGDNSIYVTKIIDGGAAQKDGRLQVGDRLM                                                             |
| exon 16    | VNNYSLEEVTHEEAVAILKNTSEVVYLKVGKPTTIYMTDPYPPDITH [S-e17                                                          |
| exon 17    | e16-S] YSPPMENHLLSGNNGTLEYKTSLPPISPGRYSPIPKHMLVDDDYT [R-e18                                                     |
| exon 18    | e17-R] PPEPVYSTVNKLCDKPASPRHYSPVECDKSFLLSAPYSHYHLGLLPDSEMT [S-e19                                               |
| exon 19    | e18-S] HSQHSTATRQPSMTLQRAVSLE [G-e20                                                                            |
| exon 20    | e19-D] EPRKVVLHKGSTGLGFNIVGGEDGEGIFVFSFILAGGPADLSGELQRGDQILS                                                    |
| exon 21    | VNGIDLRGASHEQAAAALKGAGQTVTIIAQYQPE [D-e23a                                                                      |
| exon 23a   | e21-D] YARFEAKIHDLREQ                                                                                           |
| exon 23b   | MMNHSMSSGSGSLRTNQKRSLYV [R-e24                                                                                  |
| exon 24    | e23b-R] AMFDYDKSKDGLPSQGLSFKYGDILHVINASDDEWWQARRVMLEGDSEEMGVIPSKR [R-e25                                        |
| exon 25    | e24-R] VERKERARLKTVKFNAKPGVIDSKG                                                                                |
| exon 26    | SFNDKRKKSFIKSRKFPFYKNKEQSEQETS DPE [R-e29                                                                       |
| exon 27    | DIPGLGDDGYGTKTL [R-e29                                                                                          |
| exon 28 *  |                                                                                                                 |
| exon 29    | e26-R e27-R] GQEDLILSYEPVTRQE [I-e30                                                                            |
| exon 30    | e29-I] NYTRPVIIILGPMKDRINDDLISEFPDKFGSCVP [H-e31                                                                |
| exon 31    | e30-H] TTRPKRDYEVDRDYHFVISREQMEKDIQEHKFI EAGQYNDNLYGTSVQSVRFAER                                                 |
| exon 32    | GKHCILDVSGNAIKRLQVAQLYPIAIFIKPRSLEPL [M-e33                                                                     |
| exon 33    | e32-M] EMNKRLTEEQAQKTYDRAIKLEQEFGEYFT [A-e34                                                                    |
| exon 34    | e33-A] IVQGDITLEDIYNQCKLVIEEQSGPFIWIPSKEKL                                                                      |

\* UniProt database does not have a *DLG2* isoform sequence including exon 28, therefore we cannot firmly assess its coding sequence. However, considering it is a cassette exon between exons 27 and 29, our best guess is the following

exon 28 e27-K] HVSSNASDSESSY [R-e29

## UniProt *Dlg2* protein mapping to exons

|             |                                                                                                            |
|-------------|------------------------------------------------------------------------------------------------------------|
| exon 1      | MFFACYCALRTNVK                                                                                             |
| mCFEIn7_cds | MICHCKVACTNNTLSLMFGCK                                                                                      |
| exon 2      | KYRYQDEEDGPHDHSPLRLTHEVRGPELVHVSEKNLSQIENVHGYVLQSHISPLK                                                    |
| mCFEIn8_cds | MFASIWYAKKLGRRFVHNARKAKSEK                                                                                 |
| exon 3      | MNAYLTKQHSCSRGSDGMDIGRSAPTLIRDAHCACGWQRNAQGLGYSSQTMPSGPGGPASNRTK<br>LVTLWDSVRKSPHKTSTKGGKNCGERCACPHGWFSQAQ |
| exon 4      | ASPAPIIVNTDTLDTIPY                                                                                         |
| exon 5      | VNGTEIEYEFEEITLER                                                                                          |
| exon 6      | GNSGLGFSIAGGTDNPHIGDDPGIFITKIIPGGAAAEDGRL [R-e7                                                            |
| exon 7      | e6-R] VNDCILRVNEVDVSEVSHSKAVEALKEAGSIVRLYVRRRRRPILETVVEIKLFGKPK [G-e8                                      |
| exon 8      | e7-G] LGFSIAGGVGNQHIPGDNSIYVTKIIDGGAAQKDGRLQVGDRLLM                                                        |
| exon 9      | VNNYSLEEVTHEEAVAILKNTSDVVYLKVGKPTTIYMTDPYGPDPDITH [S-e10                                                   |
| exon 10     | e9-S] YSPPMENHLLSGNNGTLEYKTSLPPISPGRYSPIPKHMLGEDDYT [R-e11                                                 |
| exon 11     | e10-R] PPEPVYSTVNKLCDKPASPRHYSPECDKSFLLSTPYPHYHLGLLPDSDMT [e11b S-e12                                      |
| exon 11b    | RYCMRFLTSSSPVACVSTRMDGWNSPPTSLALSTFLVERCSASMVRWEKLRWLFCSFCCA                                               |
| exon 12     | e11-S] HSQHSTATRQPSVTLQRAISLE [G-e15                                                                       |
| exon 14 **  |                                                                                                            |
| exon 15     | e12-G] EPRKVVHLHGKSTGLGFNIVGGEDGEGIFVSFILAGGPADLSGELQRGDQILS                                               |
| exon 16     | VNGIDLRGASHEQAAAALKGAGQTVTIIAQYQPE [D-s18a                                                                 |
| exon 18a    | e16-D] YARFEAKIHDLREQ                                                                                      |
| exon 18b    | MMNHSMSSGSGSLRTNQKRSLYV [R-e19                                                                             |
| exon 19     | e18b-R] AMFDYDKSKDGLPSQGLSFKYGDILHVINASDDEWWQARRVTLGDSEEMGVIPSKR [R-e20                                    |
| exon 20     | e19-R] VERKERARLKTVKFNAKPGVIDSKG                                                                           |
| exon 21 *   | SFNDKRKKSFIKSRKFPFYKNKEQSEQETS DPE [R-e24                                                                  |
| exon 22     | DIPGLGDDGYGKTKL [R-e24                                                                                     |
| exon 23 **  |                                                                                                            |
| exon 24     | e21-R e22-R] GQEDLILSYEPVTRQE [I-e25                                                                       |
| exon 25     | e24-I] NYTRPVIIIGPMKDRINDDLISEFPDKFGSCVP [H-e26                                                            |
| exon 26     | e25-H] TTRPKRDYEVDRDYHFVISREQMEKDIQEHKFIQAGQYNDNLYGTSVQSVRFAER                                             |
| exon 27     | GKHCILDVSGNAIKRLQVAQLYPIAIFIKPKSLEPL [M-e28                                                                |
| exon 28     | e27-M] EMNKRLTEEQAKKTYDRAIKLEQEFGEYFT [A-e29                                                               |
| exon 29     | e28-A] IVQGDITLEDIYNQCKLVIEEQSGPFIWIPSKEKL                                                                 |

\* While UniProt database does not have a *Dlg2* isoform sequence including exon 21, its DNA sequence match to *DLG2* exon 26 according to NCBI BLAST. Once verified that one the three possible translation into amino-acids sequence corresponds to *DLG2* exon 26 coding sequence, we consider *Dlg2* exon 21 coding as *DLG2* exon 26.

\*\* Exons 14 and 23 are coding exons, but UniProt database does not hold any isoform sequence in *Dlg2*. While exon 14 is not mapped to any human orthologous *DLG2* exons, exon 23 aligns to *DLG2* exon 28, for which we do not have the coding sequence either.

## Supplementary Note 4

Using the exon-amino-acid mapping in Supplementary Note 3, we map every *DLG2/Dlg2* UniProtKB/Swiss-Prot isoform to exons.

### UniProt *DLG2* isoforms inspection

#### Q15700-1

```
>sp|Q15700|DLG2_HUMAN Disks large homolog 2 OS=Homo sapiens GN=DLG2 PE=1 SV=3
MFFACYCALRTNVKKYRYQDEDAPHDHSLPRLTHEVRGPELVHVSEKNLSQIENVHGYVL
QSHISPLKASPAPIIVNTDTLDTIPYVNGTEIEYEFEEITLERGNSGLGFSIAGGTDNPH
IGDDPGIFITKIIPGAAAEDGRLRVNDCILRVNEVDVSEVSHSKAVEALKEAGSIVRLY
VRRRRPILETVVEIKLFGKPKGLGFSIAGGVGNQHIPGDNSIYVTKIIDGAAQKDGRLQ
VGDRLLMVNNYSLEEVTHEEAVAILKNTSEVVYLKVGKPTTIYMTDPYGPPDITHSYSP
MENHLLSGNNGTLEYKTSLPPISPGRYSPIPKHMLVDDDYTRPPEPVYSTVNKLCDKPAS
PRHYPVECDKSFLLSAPYSHYHLGLLPDSEMTSHSQHSTATRQPSMTLQRAVSLEGEPR
KVVHLHGKSTGLGFNIVGGEDGEGIFVSFILAGGPADLSGELQRGDQILSVNGIDLRGASH
EQAAAALKGAGQTVTIIAQYQPEDYARFEAKIHDLREQMMNHSMSGSGSLRTNQKRSLY
VRAMFDYDKSKDSGLPSQGLSFYKGDILHVINASDDEWQARRVMLEGDSEEMGVIPSKR
RVERKERARLKTVKFNAKPGVIDSKGFSFNDKRKKSIFSRKFFYKNKEQSEQETS DPER
GQEDLILSYEPVTRQEINYTRPVIILGPMKDRINDDLISEFPDKFGSCVPHTTRPKRDYE
VDGRDYHFVISREQMEKDIQEHKFI EAGQYNDNLYGTSVQSVRFVAERGGKHCILDVSGNA
IKRLQVAQLYPIAIFIKPRSL EPLMEMNKRLTEEQAKKTYDRAIKLEQEFGEYFTAIVQG
DTLEDIYNQCKLVIEEQSGPFIWIPSKEKL
```

|    | start | end | width | seq                                       | name     |
|----|-------|-----|-------|-------------------------------------------|----------|
| 1  | 1     | 14  | 14    | MFFACYCALRTNVK                            | exon 7   |
| 2  | 15    | 68  | 54    | KYRYQDEDAPHDHSLPRLT..SQIENVHGYVLQSHISPLK  | exon 8   |
| 3  | 69    | 86  | 18    | ASPAPIIVNTDTLDTIPY                        | exon 11  |
| 4  | 87    | 103 | 17    | VNGTEIEYEFEEITLER                         | exon 12  |
| 5  | 104   | 144 | 41    | GNSGLGFSIAGGTDNPHIG..GIFITKIIPGAAAEDGRL   | exon 13  |
| 6  | 145   | 145 | 1     | R                                         |          |
| 7  | 146   | 201 | 56    | VNDCILRVNEVDVSEVSHS..RRRRPILETVVEIKLFGKPK | exon 14  |
| 8  | 202   | 202 | 1     | G                                         |          |
| 9  | 203   | 247 | 45    | LGFSIAGGVGNQHIPGDNS..DGAAQKDGRLQVGDRLLM   | exon 15  |
| 10 | 248   | 295 | 48    | VNNYSLEEVTHEEAVAILK..GKPTTIYMTDPYGPPDITH  | exon 16  |
| 11 | 296   | 296 | 1     | S                                         |          |
| 12 | 297   | 341 | 45    | YSPPMENHLLSGNNGTLEY..SPGRYSPIPKHMLVDDDYT  | exon 17  |
| 13 | 342   | 342 | 1     | R                                         |          |
| 14 | 343   | 393 | 51    | PPEPVYSTVNKLCDKPASP..LSAPYSHYHLGLLPDSEMT  | exon 18  |
| 15 | 394   | 394 | 1     | S                                         |          |
| 16 | 395   | 416 | 22    | HSQHSTATRQPSMTLQRAVSLE                    | exon 19  |
| 17 | 417   | 417 | 1     | G                                         |          |
| 18 | 418   | 469 | 52    | EPRKVVHLHGKSTGLGFNIV..AGGPADLSGELQRGDQILS | exon 20  |
| 19 | 470   | 503 | 34    | VNGIDLRGASHEQAAAALKGAGQTVTIIAQYQPE        | exon 21  |
| 20 | 504   | 504 | 1     | D                                         |          |
| 21 | 505   | 518 | 14    | YARFEAKIHDLREQ                            | exon 23a |
| 22 | 519   | 541 | 23    | MMNHSMSGSGSLRTNQKRSLYV                    | exon 23b |
| 23 | 542   | 542 | 1     | R                                         |          |
| 24 | 543   | 600 | 58    | AMFDYDKSKDSGLPSQGLS..RRVMLEGDSEEMGVIPSKR  | exon 24  |
| 25 | 601   | 601 | 1     | R                                         |          |
| 26 | 602   | 626 | 25    | VERKERARLKTVKFNAKPGVIDSKG                 | exon 25  |
| 27 | 627   | 659 | 33    | SFNDKRKKSIFSRKFFYKNKEQSEQETS DPE          | exon 26  |
| 28 | 660   | 660 | 1     | R                                         |          |
| 29 | 661   | 676 | 16    | GQEDLILSYEPVTRQE                          | exon 29  |
| 30 | 677   | 677 | 1     | I                                         |          |
| 31 | 678   | 710 | 33    | NYTRPVIILGPMKDRINDDLISEFPDKFGSCVP         | exon 30  |

|    |     |     |    |                                          |         |
|----|-----|-----|----|------------------------------------------|---------|
| 32 | 711 | 711 | 1  |                                          | H       |
| 33 | 712 | 768 | 57 | TTRPKRDYEVDGRDYHFVI..YNDNLYGTSVQSVRFVAER | exon 31 |
| 34 | 769 | 804 | 36 | GKHCILDVSGNAIKRLQVAQLYPIAIFIKPRSLEPL     | exon 32 |
| 35 | 805 | 805 | 1  |                                          | M       |
| 36 | 806 | 835 | 30 | EMNKRLTEEQAKKTYDRAIKLEQEFGEYFT           | exon 33 |
| 37 | 836 | 836 | 1  |                                          | A       |
| 38 | 837 | 870 | 34 | IVQGDTLEDIYNQCKLVIEEQSGPFIWIPSKEKL       | exon 34 |

### Q15700-2

>sp|Q15700-2|DLG2\_HUMAN Isoform 2 of Disks large homolog 2 OS=Homo sapiens GN=DLG2  
 MGIFKSSLFQALLDIQEFYEVTLNLSQKSCEQKIEEANQVLQKWEKTSLLAPCHDRQLQKS  
 SELTDCSGSKENASCIEQNKENQSFENETDETTTQNGRCPAQNCSEAPAWMPVHHCTK  
 YRYQDEADPHDHSPLRLTHEVRGPELVHVSEKNLSQIENVHGYVVLQSHISPLKASPAPII  
 VNTDTLDTIPYVNGTEIEYEFEEITLERGNSGLGFSIAGGTDNPHIGDDPGIFITKIIPG  
 GAAAEDGRLRVNDCILRVNEVDVSEVSHS KAVEALKEAGSIVRLYVRRRRRPILETVVEIK  
 LFKGPKGLGFSIAGGVGNQHIPGDNSIYVTKIIDGAAQKDGRLQVGDRLLMVNNYSLEE  
 VTHEEAVAILKNTSEVVYLKVGKPTTIYMTDPYGPPDITHSYSPPMENHLLSGNNGTLEY  
 KTSLLPISPGRYSPIPKHMLVDDDYTRPPEPVYSTVNKLCDKPASP RHYSPEVCEKSFLL  
 SAPYSHYHLGLLPDSEMTSHSQHSTATRQPSMTLQRAVSLEGEPRKVVHLHGSTGLGFNI  
 VGGEDGEGIFVFSFILAGGPADLSGELQRGDQILSVNGIDLRGASHEQAAAALKGAGQTVT  
 IIAQYQPEDYARFEAKIHDLREQMNMHSMSSGSLRTNQKRSLYV RAMFDYDKSKDSGL  
 PSQGLSFKYGDILHVINASDDEWWQARRVMLEGDSEEMGVIPSKRRRVERKERARLKTVKF  
 NAKPGVIDSKGSFNDKRKKSFI SRKFPPFYKNKEQSEQETS DPERGQEDLILSYEPVTRQ  
 EINYTRPVIILGPMKDRINDDLISEFPDKFGSCVPHTTRPKRDYEVDGRDYHFVISREQM  
 EKDIQEHKFI EAGQYNDNLYGTSVQSVRFVAER GKHCILDVSGNAIKRLQVAQLYPIAIF  
 IKPRSLEPLMEMNKRLEEQAKKTYDRAIKLEQEFGEYFTAIVQGDTLEDIYNQCKLVIE  
 EQSGPFIWIPSKEKL

|    | start | end | width | seq                                       | name     |
|----|-------|-----|-------|-------------------------------------------|----------|
| 1  | 1     | 13  | 13    | MGIFKSSLFQALL                             | exon 3   |
| 2  | 14    | 14  | 1     | D                                         |          |
| 3  | 15    | 62  | 48    | IQEFYEVTLNLSQKSCEQK..WEKTSLLAPCHDRQLQKSSE | exon 4   |
| 4  | 63    | 94  | 32    | LTDCSGSKENASCIEQNKENQSFENETDETTT          | exon 5   |
| 5  | 95    | 119 | 25    | QNGRCPAQNCSEAPAWMPVHHCT                   | exon 6   |
| 6  | 120   | 173 | 54    | KYRYQDEADPHDHSPLRL..SQIENVHGYVVLQSHISPLK  | exon 8   |
| 7  | 174   | 191 | 18    | ASPAPIIVNTDTLDTIPY                        | exon 11  |
| 8  | 192   | 208 | 17    | VNGTEIEYEFEEITLER                         | exon 12  |
| 9  | 209   | 249 | 41    | GNSGLGFSIAGGTDNPHIG..GIFITKIIPGGAAAEDGRL  | exon 13  |
| 10 | 250   | 250 | 1     | R                                         |          |
| 11 | 251   | 306 | 56    | VNDCILRVNEVDVSEVSHS..RRRPILETVVEIKLFGKPK  | exon 14  |
| 12 | 307   | 307 | 1     | G                                         |          |
| 13 | 308   | 352 | 45    | LGFSIAGGVGNQHIPGDNS..DGGAAQKDGRLQVGDRLLM  | exon 15  |
| 14 | 353   | 400 | 48    | VNNYSLEEVTHEEAVAILK..GKPTTIYMTDPYGPPDITH  | exon 16  |
| 15 | 401   | 401 | 1     | S                                         |          |
| 16 | 402   | 446 | 45    | YSPPMENHLLSGNNGTLEY..SPGRYSPIPKHMLVDDDYT  | exon 17  |
| 17 | 447   | 447 | 1     | R                                         |          |
| 18 | 448   | 498 | 51    | PPEPVYSTVNKLCDKPASP..LSAPYSHYHLGLLPDSEMT  | exon 18  |
| 19 | 499   | 499 | 1     | S                                         |          |
| 20 | 500   | 521 | 22    | HSQHSTATRQPSMTLQRAVSLE                    | exon 19  |
| 21 | 522   | 522 | 1     | G                                         |          |
| 22 | 523   | 574 | 52    | EPRKVVHLHGSTGLGFNIV..AGGPADLSGELQRGDQILS  | exon 20  |
| 23 | 575   | 608 | 34    | VNGIDLRGASHEQAAAALKGAGQTVTIIAQYQPE        | exon 21  |
| 24 | 609   | 609 | 1     | D                                         |          |
| 25 | 610   | 623 | 14    | YARFEAKIHDLREQ                            | exon 23a |
| 26 | 624   | 646 | 23    | MMNHSMSSGSLRTNQKRSLYV                     | exon 23b |
| 27 | 647   | 647 | 1     | R                                         |          |



|    |     |     |    |                                           |         |
|----|-----|-----|----|-------------------------------------------|---------|
| 28 | 648 | 705 | 58 | AMFDYDKSKDSGLPSQGLS..RRVMLEGDSEEMGVIPSKR  | exon 24 |
| 29 | 706 | 706 | 1  |                                           | R       |
| 30 | 707 | 731 | 25 | VERKERARLKTVKFNAPGVDSK                    | exon 25 |
| 31 | 732 | 764 | 33 | SFNDKRKKSIFSRKFFPKYKNEQSEQETS             | exon 26 |
| 32 | 765 | 765 | 1  |                                           | R       |
| 33 | 766 | 781 | 16 | GQEDLILSYEPVTRQE                          | exon 29 |
| 34 | 782 | 782 | 1  |                                           | I       |
| 35 | 783 | 815 | 33 | NYTRPVIIILGPMKDRINDDLISEFPDKFGSCVP        | exon 30 |
| 36 | 816 | 816 | 1  |                                           | H       |
| 37 | 817 | 873 | 57 | TTRPKRDYEV DGRDYHFVI..YNDNLYGTSVQSVRFVAER | exon 31 |
| 38 | 874 | 909 | 36 | GKHCILDVSGNAIKRLQVAQLYPIAIFIKPRSLEPL      | exon 32 |
| 39 | 910 | 910 | 1  |                                           | M       |
| 40 | 911 | 940 | 30 | EMNKRLTEEQAQKTYDRAIKLEQEFGEYFT            | exon 33 |
| 41 | 941 | 941 | 1  |                                           | A       |
| 42 | 942 | 975 | 34 | IVQGDTLEDIYNQCKLVIEEQSGPFIWIPSKEKL        | exon 34 |

### Q15700-3

>sp|Q15700-3|DLG2\_HUMAN Isoform 3 of Disks large homolog 2 OS=Homo sapiens GN=DLG2  
MQRPSVSRAENYQLLWDTIASLKQCEQAMQHAFIPVNGTEIEYEFEEITLERGNSGLGFS  
IAGGTDNPHIGDDPGIFITKIIPGAAAEDGRLRVNDCILRVNEVDVSEVSHSKAVEALK  
EAGSIVRLVRRRRRPILETVVEIKLFGKPKGLGFSIAGGVGNQHIPGDNSIYVTKIIDGG  
AAQKDGRQLQVGDRLLMVNNYSLEEVTHEEAVAILKNTSEVVYLKVGKPTTIYMTDPYGP  
DITHSYSPPMENHLLSGNNGTLEYKTSLPPISPGRYSPIPKHMLVDDDYTSHSQHSTATR  
QPSMTLQRAVSLEGEPRKVVHLHGKSTGLGFNIVGGEDGEGIFVSFILAGGPADLSGELQR  
GDQILSVNGIDLRGASHEQAAAALKGAGQVTIIAQYQPEYARFEAKIHDRLREQMMNHS  
MSSGSGSLRTNQKRSLYVRAMFDYDKSKDSGLPSQGLSFKYGDILHVINASDDEWWQARR  
VMLEGDSEEMGVIPSKRRRVERKERARLKTVKFNAPGVDSKGDIPGLGDDGYGKTKLRG  
QEDLILSYEPVTRQEINYTRPVIIILGPMKDRINDDLISEFPDKFGSCVPHTTRPKRDYEV  
DGRDYHFVISREQMEKDIQEHKFIQAGQYNDNLYGTSVQSVRFVAERGKHCILDVSGNAI  
KRLQVAQLYPIAIFIKPRSLEPLMEMNKRLTEEQAQKTYDRAIKLEQEFGEYFTAIVQGD  
TLEDIYNQCKLVIEEQSGPFIWIPSKEKL

|    | start | end | width | seq                                       | name     |
|----|-------|-----|-------|-------------------------------------------|----------|
| 1  | 1     | 35  | 35    | MQRPSVSRAENYQLLWDTIASLKQCEQAMQHAFIP       | exon 10  |
| 2  | 36    | 52  | 17    | VNGTEIEYEFEEITLER                         | exon 12  |
| 3  | 53    | 93  | 41    | GNSGLGFSIAGGTDNPHIG..GIFITKIIPGAAAEDGRL   | exon 13  |
| 4  | 94    | 94  | 1     |                                           | R        |
| 5  | 95    | 150 | 56    | VNDCILRVNEVDVSEVSHS..RRRPILETVVEIKLFGKPK  | exon 14  |
| 6  | 151   | 151 | 1     |                                           | G        |
| 7  | 152   | 196 | 45    | LGFSIAGGVGNQHIPGDNS..DGGAAQKDGRQLQVGDRLLM | exon 15  |
| 8  | 197   | 244 | 48    | VNNYSLEEVTHEEAVAILK..GKPTTIYMTDPYGPDPITH  | exon 16  |
| 9  | 245   | 245 | 1     |                                           | S        |
| 10 | 246   | 290 | 45    | YSPPMENHLLSGNNGTLEY..SPGRYSPIPKHMLVDDDYT  | exon 17  |
| 11 | 291   | 291 | 1     |                                           | S        |
| 12 | 292   | 313 | 22    | HSQHSTATRQPSMTLQRAVSLE                    | exon 19  |
| 13 | 314   | 314 | 1     |                                           | G        |
| 14 | 315   | 366 | 52    | EPRKVVHLHGKSTGLGFNIV..AGGPADLSGELQRGDQILS | exon 20  |
| 15 | 367   | 400 | 34    | VNGIDLRGASHEQAAAALKGAGQVTIIAQYQPE         | exon 21  |
| 16 | 401   | 401 | 1     |                                           | D        |
| 17 | 402   | 415 | 14    | YARFEAKIHDRLREQ                           | exon 23a |
| 18 | 416   | 438 | 23    | MMNHSMSSGSGSLRTNQKRSLYV                   | exon 23b |
| 19 | 439   | 439 | 1     |                                           | R        |
| 20 | 440   | 497 | 58    | AMFDYDKSKDSGLPSQGLS..RRVMLEGDSEEMGVIPSKR  | exon 24  |
| 21 | 498   | 498 | 1     |                                           | R        |
| 22 | 499   | 523 | 25    | VERKERARLKTVKFNAPGVDSK                    | exon 25  |
| 23 | 524   | 538 | 15    | DIPGLGDDGYGKTKL                           | exon 27  |

|    |     |     |    |                                          |         |
|----|-----|-----|----|------------------------------------------|---------|
| 24 | 539 | 539 | 1  |                                          | R       |
| 25 | 540 | 555 | 16 | GQEDLILSYEPVTRQE                         | exon 29 |
| 26 | 556 | 556 | 1  |                                          | I       |
| 27 | 557 | 589 | 33 | NYTRPVIIILGPMKDRINDDLISEFPDKFGSCVP       | exon 30 |
| 28 | 590 | 590 | 1  |                                          | H       |
| 29 | 591 | 647 | 57 | TTRPKRDYEVDGRDYHFVI..YNDNLYGTSVQSVRFVAER | exon 31 |
| 30 | 648 | 683 | 36 | GKHCILDVSGNAIKRLQVAQLYPIAIFIKPRSLEPL     | exon 32 |
| 31 | 684 | 684 | 1  |                                          | M       |
| 32 | 685 | 714 | 30 | EMNKRLTEEQAKKTYDRAIKLEQEFGEYFT           | exon 33 |
| 33 | 715 | 715 | 1  |                                          | A       |
| 34 | 716 | 749 | 34 | IVQGDTLEDIYNQCKLVIEEQSGPFIWIPSKEKL       | exon 34 |

**Q15700-4**

>sp|Q15700-4|DLG2\_HUMAN Isoform 4 of Disks large homolog 2 OS=Homo sapiens GN=DLG2

MNAYLTKQHSCSRGSDGMDAVRSAPTLIRDAHCACGWQRNCQGLGYSSQTMPSSGGGPA  
 SNRTGGSSFNRTLWDSVRKSPHKSTKGGKTCGEHCTCPHGWFSPAQASPAPIIVNTDTL  
 DTIPYVNGTEIEYEFEEITLERGNSGLGFSIAGGTDNPHIGDDPGIFITKIIPGAAAED  
 GRLRVNDCILRVNEVDVSEVSHSKAVEALKEAGSIVRLYVRRRPILETVVEIKLFGKPK  
 GLGFSIAGGVGNQHIPGDNSIYVTKIIDGGAAQKDGRLLQVGDRLLMVNNYSLEEVTHEEA  
 VAILKNTSEVVYLKVGKPTTIYMTDPYGPDDITHSYSPPMENHLLSGNNGTLEYKTSLPP  
 ISPGRYSPIPKHMLVDDDYTRPPEPVYSTVNKLCDKPASPVRHYPVECDKSFLLSAPYSH  
 YHLGLLPDSEMTSHSQHSTATRQPSMTLQRAVSLEGEPRKVVHLKGGSTGLGFNIVGGEDG  
 EGIFVSVFILAGGPADLSGELQRGDQILSVNGIDLRGASHEQAAAALKGAGQVTVIIAQYQ  
 PEDYARFEAKIHDLREQMMNHSMSSGSLRTNQKRSLYVRAMFDYDKSKDGLPSQGLS  
 FKYGDILHVINASDDEWQARRVMLEGDSEEMGVIPSKRRVERKERARLKTVKFNAKPGV  
 IDSKGSFNDKRKKSIFSRKFPFYKNKEQSEQETSDPERGQEDLILSYEPVTRQEINYTR  
 PVIILGPMKDRINDDLISEFPDKFGSCVPHTTRPKRDYEVDGRDYHFVISREQMEKDIQE  
 HKFIEAGQYNDNLYGTSVQSVRFVAERGKHCILDVSGNAIKRLQVAQLYPIAIFIKPRSL  
 EPLMEMNKRLTEEQAKKTYDRAIKLEQEFGEYFTAIVQGDTLEDIYNQCKLVIEEQSGPF  
 IWIPSKEKL

|    | start | end | width | seq                                       | name     |
|----|-------|-----|-------|-------------------------------------------|----------|
| 1  | 1     | 107 | 107   | MNAYLTKQHSCSRGSDGMD..KGTCGEHCTCPHGWFSPAQ  | exon 9   |
| 2  | 108   | 125 | 18    | ASPAPIIVNTDTLDTIPY                        | exon 11  |
| 3  | 126   | 142 | 17    | VNGTEIEYEFEEITLER                         | exon 12  |
| 4  | 143   | 183 | 41    | GNSGLGFSIAGGTDNPHIG..GIFITKIIPGAAAEDGRL   | exon 13  |
| 5  | 184   | 184 | 1     |                                           | R        |
| 6  | 185   | 240 | 56    | VNDCILRVNEVDVSEVSHS..RRRPILETVVEIKLFGKPK  | exon 14  |
| 7  | 241   | 241 | 1     |                                           | G        |
| 8  | 242   | 286 | 45    | LGFSIAGGVGNQHIPGDNS..DGGAAQKDGRLLQVGDRLLM | exon 15  |
| 9  | 287   | 334 | 48    | VNNYSLEEVTHEEAVAILK..GKPTTIYMTDPYGPDDITH  | exon 16  |
| 10 | 335   | 335 | 1     |                                           | S        |
| 11 | 336   | 380 | 45    | YSPPMENHLLSGNNGTLEY..SPGRYSPIPKHMLVDDDYT  | exon 17  |
| 12 | 381   | 381 | 1     |                                           | R        |
| 13 | 382   | 432 | 51    | PPEPVYSTVNKLCDKPASP..LSAPYSHYHLGLLPDSEMT  | exon 18  |
| 14 | 433   | 433 | 1     |                                           | S        |
| 15 | 434   | 455 | 22    | HSQHSTATRQPSMTLQRAVSLE                    | exon 19  |
| 16 | 456   | 456 | 1     |                                           | G        |
| 17 | 457   | 508 | 52    | EPRKVVHLKGGSTGLGFNIV..AGGPADLSGELQRGDQILS | exon 20  |
| 18 | 509   | 542 | 34    | VNGIDLRGASHEQAAAALKGAGQVTVIIAQYQPE        | exon 21  |
| 19 | 543   | 543 | 1     |                                           | D        |
| 20 | 544   | 557 | 14    | YARFEAKIHDLREQ                            | exon 23a |
| 21 | 558   | 580 | 23    | MMNHSMSSGSLRTNQKRSLYV                     | exon 23b |
| 22 | 581   | 581 | 1     |                                           | R        |
| 23 | 582   | 639 | 58    | AMFDYDKSKDGLPSQGLS..RRVMLEGDSEEMGVIPSKR   | exon 24  |
| 24 | 640   | 640 | 1     |                                           | R        |

|    |     |     |    |                                         |         |
|----|-----|-----|----|-----------------------------------------|---------|
| 25 | 641 | 665 | 25 | VERKERARLKTVKFNAKPGVIDSKG               | exon 25 |
| 26 | 666 | 698 | 33 | SFNDKRKKSFIFSRKFFYKNKEQSEQETSDE         | exon 26 |
| 27 | 699 | 699 | 1  | R                                       |         |
| 28 | 700 | 715 | 16 | GQEDLILSYEPVTRQE                        | exon 29 |
| 29 | 716 | 716 | 1  | I                                       |         |
| 30 | 717 | 749 | 33 | NYTRPVIIIGPMKDRINDDLISEFPDKFGSCVP       | exon 30 |
| 31 | 750 | 750 | 1  | H                                       |         |
| 32 | 751 | 807 | 57 | TTRPKRDYEVDRDYHFVI..YNDNLYGTSVQSVRFVAER | exon 31 |
| 33 | 808 | 843 | 36 | GKHCILDVSGNAIKRLQVAQLYPIAIFIKPRSLEPL    | exon 32 |
| 34 | 844 | 844 | 1  | M                                       |         |
| 35 | 845 | 874 | 30 | EMNKRLTEEQAKKTYDRAIKLEQEFGEYFT          | exon 33 |
| 36 | 875 | 875 | 1  | A                                       |         |
| 37 | 876 | 909 | 34 | IVQGDTLEDIYNQCKLVIEEQSGPFIWIPSKEKL      | exon 34 |

### Q15700-5

>sp|Q15700-5|DLG2\_HUMAN Isoform 5 of Disks large homolog 2 OS=Homo sapiens GN=DLG2  
MMNHSMSGSGSLRTNQKRSLYVRAMFDYDKSKDGLPSQGLSFKYGDILHVINASDDEW  
WQARRVMLEGDSEEMGVIPSKRRVERKERARLKTVKFNAKPGVIDSKGDIPGLGDDGYGT  
KTLRGQEDLILSYEPVTRQEINYTRPVIIIGPMKDRINDDLISEFPDKFGSCVPHTTRPK  
RDYEVDRDYHFVISREQMEKDIQEHKFIQAGQYNDNLYGTSVQSVRFVAERGKHCILDV  
SGNAIKRLQVAQLYPIAIFIKPRSLEPLMEMNKRLTEEQAKKTYDRAIKLEQEFGEYFTA  
IVQGDTLEDIYNQCKLVIEEQSGPFIWIPSKEKL

|    | start | end | width | seq                                     | name     |
|----|-------|-----|-------|-----------------------------------------|----------|
| 1  | 1     | 23  | 23    | MMNHSMSGSGSLRTNQKRSLYV                  | exon 23b |
| 2  | 24    | 24  | 1     | R                                       |          |
| 3  | 25    | 82  | 58    | AMFDYDKSKDGLPSQGLS..RRVMLEGDSEEMGVIPSKR | exon 24  |
| 4  | 83    | 83  | 1     | R                                       |          |
| 5  | 84    | 108 | 25    | VERKERARLKTVKFNAKPGVIDSKG               | exon 25  |
| 6  | 109   | 123 | 15    | DIPGLGDDGYGKTL                          | exon 27  |
| 7  | 124   | 124 | 1     | R                                       |          |
| 8  | 125   | 140 | 16    | GQEDLILSYEPVTRQE                        | exon 29  |
| 9  | 141   | 141 | 1     | I                                       |          |
| 10 | 142   | 174 | 33    | NYTRPVIIIGPMKDRINDDLISEFPDKFGSCVP       | exon 30  |
| 11 | 175   | 175 | 1     | H                                       |          |
| 12 | 176   | 232 | 57    | TTRPKRDYEVDRDYHFVI..YNDNLYGTSVQSVRFVAER | exon 31  |
| 13 | 233   | 268 | 36    | GKHCILDVSGNAIKRLQVAQLYPIAIFIKPRSLEPL    | exon 32  |
| 14 | 269   | 269 | 1     | M                                       |          |
| 15 | 270   | 299 | 30    | EMNKRLTEEQAKKTYDRAIKLEQEFGEYFT          | exon 33  |
| 16 | 300   | 300 | 1     | A                                       |          |
| 17 | 301   | 334 | 34    | IVQGDTLEDIYNQCKLVIEEQSGPFIWIPSKEKL      | exon 34  |

## UniProt *Dlg2* isoforms inspection

### Q91XM9-1

>sp|Q91XM9|DLG2\_MOUSE Disks large homolog 2 OS=Mus musculus GN=Dlg2 PE=1 SV=2

MFFACYCALRTNVKKYRYQDEDGPHDHSPLRLTHEVRGPELVHVSEKNLSQIENVHGVVL  
 QSHISPLKASPAPIIVNTDTLDTIPYVNGTEIEYEFEEITLERGNSGLGFSIAGGTDNPH  
 IGDDPGIFITKIIPGGAAAEDGRLRVNDCILRVNEVDVSEVSHSKAVEALKEAGSIVRLY  
 VRRRRPILETVVEIKLFGKPKGLGFSIAGGVGNQHIPGDNSIYVTKIIDGAAQKDGRLQ  
 VGDRLLMVNNYSLEEVTHEEAVAILKNTSDVVYLKVGKPTTIYMTDPYGGPDITHSYSP  
 MENHLLSGNNGTLEYKTSLPPISPGRYSPIPKHMLGEDDYTRPEPVYSTVNKLCDKPAS  
 PRHYSPECDKSFLLSTPYPHYHLGLLPDSMTSHSQHSTATRQPSVTLQRAISLEGEPR  
 KVVVLHKGSTGLGFNIVGGEDGEGIFVSFILAGGPADLSGELQRGDQILSVNGIDLRGASH  
 EQAAAALKGAGQTVTIIAQYQPEDYARFEAKIHDLREQMMNHSMSGSLRTNQKRSLY  
 VRAMFDYDKSKDSGLPSQGLSFKYGDILHVINASDDEWQARRVTLGDSEEMGVIPSKR  
 RVERKERARLKTVKFNAKPGVIDSKGDIPLGDDGYGKTLRGQEDLILSYEPVTRQEIN  
 YTRPVIIIGPMKDRINDDLISEFPDKFGSCVPHTRPKRDYEVDRDYHFVISREQMEKD  
 IQEHKFIEAGQYNDNLYGTSVQSVRFAERGKHCILDVSGNAIKRLQVAQLYPIAIFIKP  
 KSLEPLMEMNKRLTEEQAKKTYDRAIKLEQEFGEYFTAIVQGDITLEDIYNQCKLVIEEQS  
 GPFIIWIPSKEKL

|    | start | end | width | seq                                       | name     |
|----|-------|-----|-------|-------------------------------------------|----------|
| 1  | 1     | 14  | 14    | MFFACYCALRTNVK                            | exon 1   |
| 2  | 15    | 68  | 54    | KYRYQDEDGPHDHSPLRLT..SQIENVHGVVLQSHISPLK  | exon 2   |
| 3  | 69    | 86  | 18    | ASPAPIIVNTDTLDTIPY                        | exon 4   |
| 4  | 87    | 103 | 17    | VNGTEIEYEFEEITLER                         | exon 5   |
| 5  | 104   | 144 | 41    | GNSGLGFSIAGGTDNPHIG..GIFITKIIPGGAAAEDGRL  | exon 6   |
| 6  | 145   | 145 | 1     | R                                         |          |
| 7  | 146   | 201 | 56    | VNDCILRVNEVDVSEVSHS..RRRPILETVVEIKLFGKPK  | exon 7   |
| 8  | 202   | 202 | 1     | G                                         |          |
| 9  | 203   | 247 | 45    | LGFSIAGGVGNQHIPGDNS..DGGAAQKDGRLQVGDRLLM  | exon 8   |
| 10 | 248   | 295 | 48    | VNNYSLEEVTHEEAVAILK..GKPTTIYMTDPYGGPDITH  | exon 9   |
| 11 | 296   | 296 | 1     | S                                         |          |
| 12 | 297   | 341 | 45    | YSPPMENHLLSGNNGTLEY..SPGRYSPIPKHMLGEDDYT  | exon 10  |
| 13 | 342   | 342 | 1     | R                                         |          |
| 14 | 343   | 393 | 51    | PPEPVYSTVNKLCDKPASP..LSTPYPHYHLGLLPDSMT   | exon 11  |
| 15 | 394   | 394 | 1     | S                                         |          |
| 16 | 395   | 416 | 22    | HSQHSTATRQPSVTLQRAISLE                    | exon 12  |
| 17 | 417   | 417 | 1     | G                                         |          |
| 18 | 418   | 469 | 52    | EPRKVVVLHKGSTGLGFNIV..AGGPADLSGELQRGDQILS | exon 15  |
| 19 | 470   | 503 | 34    | VNGIDLRGASHEQAAAALKGAGQTVTIIAQYQPE        | exon 16  |
| 20 | 504   | 504 | 1     | D                                         |          |
| 21 | 505   | 518 | 14    | YARFEAKIHDLREQ                            | exon 18a |
| 22 | 519   | 541 | 23    | MMNHSMSGSLRTNQKRSLYV                      | exon 18b |
| 23 | 542   | 542 | 1     | R                                         |          |
| 24 | 543   | 600 | 58    | AMFDYDKSKDSGLPSQGLS..RRVTLGDSEEMGVIPSKR   | exon 19  |
| 25 | 601   | 601 | 1     | R                                         |          |
| 26 | 602   | 626 | 25    | VERKERARLKTVKFNAKPGVIDSKG                 | exon 20  |
| 27 | 627   | 641 | 15    | DIPGLGDDGYGKTL                            | exon 22  |
| 28 | 642   | 642 | 1     | R                                         |          |
| 29 | 643   | 658 | 16    | GQEDLILSYEPVTRQE                          | exon 24  |
| 30 | 659   | 659 | 1     | I                                         |          |
| 31 | 660   | 692 | 33    | NYTRPVIIIGPMKDRINDDLISEFPDKFGSCVP         | exon 25  |
| 32 | 693   | 693 | 1     | H                                         |          |
| 33 | 694   | 750 | 57    | TTRPKRDYEVDRDYHFVI..YNDNLYGTSVQSVRFAER    | exon 26  |
| 34 | 751   | 786 | 36    | GKHCILDVSGNAIKRLQVAQLYPIAIFIKPKSLEPL      | exon 27  |
| 35 | 787   | 787 | 1     | M                                         |          |
| 36 | 788   | 817 | 30    | EMNKRLTEEQAKKTYDRAIKLEQEFGEYFT            | exon 28  |

37 818 818 1 A  
 38 819 852 34 IVQGDITLEDIYNQCKLVIEEQSGPFIWIPSKEKL exon 29

**Q91XM9-2**

>sp|Q91XM9-2|DLG2\_MOUSE Isoform 2 of Disks large homolog 2 OS=Mus musculus GN=Dlg2

MICHCKVACTNNTLSLMFGCKKYRYQDEDGPHDHSPLRLTHEVRGPELVHVSEKNLSQIE  
 NVHGYVLQSHISPLKASPAPIIVNTDLDLTIPYVNGTEIEYEFEEITLERGNSGLGFSIA  
 GGTDNPHIGDDPGIFITKIIPGAAAEDGRLRVNDCILRVNEVDVSEVSHSKAVEALKEA  
 GSIVRLYVRRRRRPILETVVEIKLFKGPGLGFSIAGGVGNQHIPGDNSIYVTKIIDGGAA  
 QKDGRLLQVGDRLLMVNNYSLEEVTHEEAVAILKNTSDVVYLKVGKPTTIYMTDPYGPDI  
 THSYSPPMENHLLSGNNGTLEYKTSPLPISPGRYSPIPKHMLGEDDYTRPPEPVYSTVVK  
 LCDKPASPRHYSPECDKSFLLSTPYPHYHLGLLPDSMTSHSQHSTATRQPSVTLQRAI  
 SLEGEPRKVVHLKGGSTGLGFNIVGGEDGEGIFVSFILAGGPADLSGELQRGDQILSVNGI  
 DLRGASHEQAAAALKGAGQVTVTIIAQYQPEDYARFEAKIHDLREQMMNHSMSGSGSLRT  
 NQKRSLYVRAMFDYDKSKDGLPSQGLSFYKGDILHVINASDDEWWQARRVTLGDSEEM  
 GVIPSKRRVERKERARLKTVKFNAKPGVIDSKGDIPGLGDDGYGKTKLREQDLILSYEP  
 VTRQEINYTRPVIIILGPMKDRINDDLISEFPDKFGSCVPHTTRPKRDYEVDRDYHFVIS  
 REQMEKDIQEHKFIAGQYNDNLVGTSVQSVRFVAERGGKHCILDVSGNAIKRLQVAQLYP  
 IAIFIKPKSLEPLMEMNKRLEEQAKKTYDRAIKLEQEFGEYFTAIVQGDITLEDIYNQCK  
 LVIEEQSGPFIWIPSKEKL

|    | start | end | width | seq                                       | name        |
|----|-------|-----|-------|-------------------------------------------|-------------|
| 1  | 1     | 21  | 21    | MICHCKVACTNNTLSLMFGCK                     | mCFEIn1_cds |
| 2  | 22    | 75  | 54    | KYRYQDEDGPHDHSPLRLT..SQIENVHGYVLQSHISPLK  | exon 2      |
| 3  | 76    | 93  | 18    | ASPAPIIVNTDLDLTIPY                        | exon 4      |
| 4  | 94    | 110 | 17    | VNGTEIEYEFEEITLER                         | exon 5      |
| 5  | 111   | 151 | 41    | GNSGLGFSIAGGTDNPHIG..GIFITKIIPGAAAEDGRL   | exon 6      |
| 6  | 152   | 152 | 1     | R                                         |             |
| 7  | 153   | 208 | 56    | VNDCILRVNEVDVSEVSHS..RRRPILETVVEIKLFKGPK  | exon 7      |
| 8  | 209   | 209 | 1     | G                                         |             |
| 9  | 210   | 254 | 45    | LGFSIAGGVGNQHIPGDNS..DGGAAQKDGRLLQVGDRLLM | exon 8      |
| 10 | 255   | 302 | 48    | VNNYSLEEVTHEEAVAILK..GKPTTIYMTDPYGPDI     | exon 9      |
| 11 | 303   | 303 | 1     | S                                         |             |
| 12 | 304   | 348 | 45    | YSPPMENHLLSGNNGTLEY..SPGRYSPIPKHMLGEDDYT  | exon 10     |
| 13 | 349   | 349 | 1     | R                                         |             |
| 14 | 350   | 400 | 51    | PPEPVYSTVKNCLCDKPASP..LSTPYPHYHLGLLPDSMT  | exon 11     |
| 15 | 401   | 401 | 1     | S                                         |             |
| 16 | 402   | 423 | 22    | HSQHSTATRQPSVTLQRAISLE                    | exon 12     |
| 17 | 424   | 424 | 1     | G                                         |             |
| 18 | 425   | 476 | 52    | EPRKVVHLKGGSTGLGFNIV..AGGPADLSGELQRGDQILS | exon 15     |
| 19 | 477   | 510 | 34    | VNGIDLRGASHEQAAAALKGAGQVTVTIIAQYQPE       | exon 16     |
| 20 | 511   | 511 | 1     | D                                         |             |
| 21 | 512   | 525 | 14    | YARFEAKIHDLREQ                            | exon 18a    |
| 22 | 526   | 548 | 23    | MMNHSMSGSGSLRTNQKRSLYV                    | exon 18b    |
| 23 | 549   | 549 | 1     | R                                         |             |
| 24 | 550   | 607 | 58    | AMFDYDKSKDGLPSQGLS..RRVTLGDSEEMGVIPSKR    | exon 19     |
| 25 | 608   | 608 | 1     | R                                         |             |
| 26 | 609   | 633 | 25    | VERKERARLKTVKFNAKPGVIDSKG                 | exon 20     |
| 27 | 634   | 648 | 15    | DIPGLGDDGYGKTKL                           | exon 22     |
| 28 | 649   | 649 | 1     | R                                         |             |
| 29 | 650   | 665 | 16    | GQEDLILSYEPVTRQE                          | exon 24     |
| 30 | 666   | 666 | 1     | I                                         |             |
| 31 | 667   | 699 | 33    | NYTRPVIIILGPMKDRINDDLISEFPDKFGSCVP        | exon 25     |
| 32 | 700   | 700 | 1     | H                                         |             |
| 33 | 701   | 757 | 57    | TTRPKRDYEVDRDYHFVI..YNDNLVGTSVQSVRFVAER   | exon 26     |
| 34 | 758   | 793 | 36    | GKHCILDVSGNAIKRLQVAQLYPIAIFIKPKSLEPL      | exon 27     |

|    |     |     |    |       |   |         |
|----|-----|-----|----|-------|---|---------|
| 35 | 794 | 794 | 1  |       | M |         |
| 36 | 795 | 824 | 30 | EMNKR | L | exon 28 |
| 37 | 825 | 825 | 1  |       | A |         |
| 38 | 826 | 859 | 34 | IVQGD | T | exon 29 |

### Q91XM9-3

>sp|Q91XM9-3|DLG2\_MOUSE Isoform 3 of Disks large homolog 2 OS=Mus musculus GN=Dlg2

MQHAFIPASPAPIIVNTDLDLTIPYVNGTEIEYEFEEITLERGNSGLGFSIAGGTDNPHI  
GDDPGIFITKIIPGGAAAEDGRLRVNDCILRVNEVDVSEVSHSKAVEALKEAGSIVRLYV  
RRRRPILETVVEIKLFGKPKGLGFSIAGGVGNQHIPGDNSIYVTKIIDGAAQKDGRLQV  
GDRLLMVNNYSLEEVTHEEAVAILKNTSDVVYLKVGKPTTIYMTDPYGPDPDITHSYSPPM  
ENHLLSGNNGTLEYKTSLPPISPGRYSPIPKHMLGEDDYTRPPEPVYSTVNKLCDKPASP  
RHYSPEVCDKSFLLSTPYPHYHLGLLPDSMTSHSQHSTATRQPSVTLQRAISLEGEPRK  
VVLHKGSTGLGFNIVGGEDGEGIFVSFILAGGPADLSGELQRGDQILSVNGIDLRGASHE  
QAAAALKGAGQVTIIAQYQPEDYARFEAKIHDLREQMMNHSMSGSLRTNQKRSLYV  
RAMFDYDKSKDGLPSQGLSFKYGDILHVINASDDEWWQARRVTLGDSEEMGVIPSKRR  
VERKERARLKTVKFNAKPGVIDSKGDIPGLGDDGYGKTLRGQEDLILSYEPVTRQEINY  
TRPVIIILGPMKDRINDDLISEFPDKFGSCVPHTTRPKRDYEVDRDYHFVISREQMEKDI  
QEHKFIEAGQYNDNLVYTSVQSVRFVAERGHKHCILDVSGNAIKRLQVAQLYPIAIFIKPK  
SLEPLMEMNKRLEEQAKKTYDRAIKLEQEFGEYFTAIVQGDLEDIYNQCKLVIEEQSG  
PFIWIPSKEKL

|    | start | end | width | seq                                       | name     |
|----|-------|-----|-------|-------------------------------------------|----------|
| 1  | 1     | 7   | 7     | MQHAFIP                                   |          |
| 2  | 8     | 25  | 18    | ASPAPIIVNTDLDLTIPY                        | exon 4   |
| 3  | 26    | 42  | 17    | VNGTEIEYEFEEITLER                         | exon 5   |
| 4  | 43    | 83  | 41    | GNSGLGFSIAGGTDNPHIG..GIFITKIIPGGAAAEDGRL  | exon 6   |
| 5  | 84    | 84  | 1     | R                                         |          |
| 6  | 85    | 140 | 56    | VNDCILRVNEVDVSEVSHS..RRRRPILETVVEIKLFGKPK | exon 7   |
| 7  | 141   | 141 | 1     | G                                         |          |
| 8  | 142   | 186 | 45    | LGFSIAGGVGNQHIPGDNS..DGGAAQKDGRLQVGDRLLM  | exon 8   |
| 9  | 187   | 234 | 48    | VNNYSLEEVTHEEAVAILK..GKPTTIYMTDPYGPDPDITH | exon 9   |
| 10 | 235   | 235 | 1     | S                                         |          |
| 11 | 236   | 280 | 45    | YSPPMENHLLSGNNGTLEY..SPGRYSPIPKHMLGEDDYT  | exon 10  |
| 12 | 281   | 281 | 1     | R                                         |          |
| 13 | 282   | 332 | 51    | PPEPVYSTVNKLCDKPASP..LSTPYPHYHLGLLPDSMT   | exon 11  |
| 14 | 333   | 333 | 1     | S                                         |          |
| 15 | 334   | 355 | 22    | HSQHSTATRQPSVTLQRAISLE                    | exon 12  |
| 16 | 356   | 356 | 1     | G                                         |          |
| 17 | 357   | 408 | 52    | EPRKVVLHKGSTGLGFNIV..AGGPADLSGELQRGDQILS  | exon 15  |
| 18 | 409   | 442 | 34    | VNGIDLRGASHEQAAAALKGAGQVTIIAQYQPE         | exon 16  |
| 19 | 443   | 443 | 1     | D                                         |          |
| 20 | 444   | 457 | 14    | YARFEAKIHDLREQ                            | exon 18a |
| 21 | 458   | 480 | 23    | MMNHSMSGSLRTNQKRSLYV                      | exon 18b |
| 22 | 481   | 481 | 1     | R                                         |          |
| 23 | 482   | 539 | 58    | AMFDYDKSKDGLPSQGLS..RRVTLGDSEEMGVIPSKR    | exon 19  |
| 24 | 540   | 540 | 1     | R                                         |          |
| 25 | 541   | 565 | 25    | VERKERARLKTVKFNAKPGVIDSKG                 | exon 20  |
| 26 | 566   | 580 | 15    | DIPGLGDDGYGKTL                            | exon 22  |
| 27 | 581   | 581 | 1     | R                                         |          |
| 28 | 582   | 597 | 16    | GQEDLILSYEPVTRQE                          | exon 24  |
| 29 | 598   | 598 | 1     | I                                         |          |
| 30 | 599   | 631 | 33    | NYTRPVIIILGPMKDRINDDLISEFPDKFGSCVP        | exon 25  |
| 31 | 632   | 632 | 1     | H                                         |          |
| 32 | 633   | 689 | 57    | TTRPKRDYEVDRDYHFVI..YNDNLVYTSVQSVRFVAER   | exon 26  |
| 33 | 690   | 725 | 36    | GKHCILDVSGNAIKRLQVAQLYPIAIFIKPKSLEPL      | exon 27  |

```

34 726 726 1 M
35 727 756 30 EMNKRRLTEEQAKKTYDRAIKLEQEFGEYFT exon 28
36 757 757 1 A
37 758 791 34 IVQGDITLEDIYNQCKLVIEEQSGPFIWIPSKEKL exon 29

```

MQHAFIP sequence matches with the last seven amino-acids of *DLG2* exon 10, suggesting the presence of an unknown mouse coding exon between exons 3 and 4. This hypothesis is backed up the the alignment of the RT-PCR primer, used to identify such isoform in mouse, in chr7:91711767-91711790, that locates between exons 3 and 4. See Supplementary Note 6 for details and [12].

### Q91XM9-4

>sp|Q91XM9-4|DLG2\_MOUSE Isoform 4 of Disks large homolog 2 OS=Mus musculus GN=Dlg2

```

MNAYLTKQHSCSRGSDGMDIGRSAPTLIRDAHACAGWQRNAQGLGYSSQTMPSSGGPGA
SNRKLVTLWDSVRKSPHKSTSTKGGKNGCGERCACPHGWFSPAQASPAPIIVNTDTLDTIP
YVNGTEIEYEFEEITLERGNSGLGFSIAGGTDNPHIGDDPGIFITKIIPGAAAEDGRLR
VNDCILRVNEVDVSEVSHSKAVEALKEAGSIVRLYVRRRPILETVVEIKLFKGPGLGF
SIAGGVGNQHIPGDNSIYVTKIIDGGAAQKDGRLQVGDRLLMVNNYSLEEVTHEEAVAIL
KNTSDVVYLKVGKPTTIYMTDPYGGPDITHSYSPPMENHLLSGNNGTLEYKTSLPPISPG
RYSPIPKHMLGEDDYTRPEPVYSTVNKLCDKPASPRHYSPEVCDKSFLLSTPYPHYHLG
LLPDSMTSHSQHSTATRQPSVTLQRAISLEGEPRKVVHLKGSTGLGFNIVGGEDGEGIF
VSFILAGGPADLSGELQRGDQILSVNGIDLRGASHEQAAAALKGAGQVTIIAQYQPEY
ARFEAKIHDRLREQMMNHSMSGSLRTNQKRSLYVRAMFDYDKSKDGLPSQGLSFKYG
DILHVINASDDEWQARRVTLGDSEEMGVIPSKRRVERKERARLKTVKFNAKPGVIDSK
GDIPGLGDDGYGKTLRQEDLILSYEPVTRQEIYTRPVIILGPMKDRINDDLISEFPD
KFGSCVPHTTRPKRDYEVDRDYHFVISREQMEKDIQEHKFEAGQYNDNLYGTSVQSVR
FVAERKHCILDVSGNAIKRLQVAQLYPIAIFIKPKSLEPLMEMNKRLEEQAKKTYDRA
IKLEQEFGEYFTAIVQGDITLEDIYNQCKLVIEEQSGPFIWIPSKEKL

```

|    | start | end | width | seq                                      | name     |
|----|-------|-----|-------|------------------------------------------|----------|
| 1  | 1     | 103 | 103   | MNAYLTKQHSCSRGSDGMD..KGNCGERCACPHGWFSPAQ | exon 3   |
| 2  | 104   | 121 | 18    | ASPAPIIVNTDTLDTIPY                       | exon 4   |
| 3  | 122   | 138 | 17    | VNGTEIEYEFEEITLER                        | exon 5   |
| 4  | 139   | 179 | 41    | GNSGLGFSIAGGTDNPHIG..GIFITKIIPGAAAEDGRL  | exon 6   |
| 5  | 180   | 180 | 1     | R                                        |          |
| 6  | 181   | 236 | 56    | VNDCILRVNEVDVSEVSHS..RRRPILETVVEIKLFKGP  | exon 7   |
| 7  | 237   | 237 | 1     | G                                        |          |
| 8  | 238   | 282 | 45    | LGFSIAGGVGNQHIPGDNS..DGGAAQKDGRLQVGDRLM  | exon 8   |
| 9  | 283   | 330 | 48    | VNNYSLEEVTHEEAVAILK..GKPTTIYMTDPYGGPDITH | exon 9   |
| 10 | 331   | 331 | 1     | S                                        |          |
| 11 | 332   | 376 | 45    | YSPPMENHLLSGNNGTLEY..SPGRYSPIPKHMLGEDDYT | exon 10  |
| 12 | 377   | 377 | 1     | R                                        |          |
| 13 | 378   | 428 | 51    | PPEPVYSTVNKLCDKPASP..LSTPYPHYHLGLLPDSMT  | exon 11  |
| 14 | 429   | 429 | 1     | S                                        |          |
| 15 | 430   | 451 | 22    | HSQHSTATRQPSVTLQRAISLE                   | exon 12  |
| 16 | 452   | 452 | 1     | G                                        |          |
| 17 | 453   | 504 | 52    | EPRKVVHLKGSTGLGFNIV..AGGPADLSGELQRGDQILS | exon 15  |
| 18 | 505   | 538 | 34    | VNGIDLRGASHEQAAAALKGAGQVTIIAQYQPE        | exon 16  |
| 19 | 539   | 539 | 1     | D                                        |          |
| 20 | 540   | 553 | 14    | YARFEAKIHDRLREQ                          | exon 18a |
| 21 | 554   | 576 | 23    | MMNHSMSGSLRTNQKRSLYV                     | exon 18b |
| 22 | 577   | 577 | 1     | R                                        |          |
| 23 | 578   | 635 | 58    | AMFDYDKSKDGLPSQGLS..RRVTLGDSEEMGVIPSKR   | exon 19  |
| 24 | 636   | 636 | 1     | R                                        |          |
| 25 | 637   | 661 | 25    | VERKERARLKTVKFNAKPGVIDSKG                | exon 20  |
| 26 | 662   | 676 | 15    | DIPGLGDDGYGKTL                           | exon 22  |
| 27 | 677   | 677 | 1     | R                                        |          |
| 28 | 678   | 693 | 16    | GQEDLILSYEPVTRQE                         | exon 24  |

|    |     |     |    |                                              |         |
|----|-----|-----|----|----------------------------------------------|---------|
| 29 | 694 | 694 | 1  |                                              | I       |
| 30 | 695 | 727 | 33 | NYTRPVIILGPMKDRINDDLISEFPDKFGSCVP            | exon 25 |
| 31 | 728 | 728 | 1  |                                              | H       |
| 32 | 729 | 785 | 57 | TTRPKRDYEV DGRDYHFVI . . YNDNLYGTSVQSVRFVAER | exon 26 |
| 33 | 786 | 821 | 36 | GKHCILDVSGNAIKRLQVAQLYPIAIFIKPKSLEPL         | exon 27 |
| 34 | 822 | 822 | 1  |                                              | M       |
| 35 | 823 | 852 | 30 | EMNKRLTEEQAKKTYDRAIKLEQEFGEYFT               | exon 28 |
| 36 | 853 | 853 | 1  |                                              | A       |
| 37 | 854 | 887 | 34 | IVQGD TLEDIYNQCKLVIEEQSGPFIWIPSKEKL          | exon 29 |

### Q91XM9-5

>sp|Q91XM9-5|DLG2\_MOUSE Isoform 5 of Disks large homolog 2 OS=Mus musculus GN=Dlg2  
 MNAYLTKQHSCSRGSDGMDIGRSAPTLIRDAHCACGWQRNAQGLGYSSQTMPSSGGGPA  
 SNRTKLVTLWDSVRKSPHKTSTKGGKNGCGERCACPHGWFSQAQSPAPIIVNTD TLD TIP  
 YVNGTEIEYEFEEITLERGNSGLGFSIAGGTDNPHIGDDPGIFITKIIPGAAAEDGRLR  
 VNCILRVNEVDVSEVSHSKAVEALKEAGSIVRLYVRRRRRPILETVVEIKLFGKPKGLGF  
 SIAGGVGNQHIPGDNSIYVTKIIDGAAQKDGRLLQVGDRLLMVNYSLEEVTHEEAVAIL  
 KNTSDVVYLKVGKPTTIYMTDPYGGPDITHSYSPPMENHLLSGNNGTLEYKTSLPPISPG  
 RYSPPIPKHMLGEDDYTRPEPVYSTVNKLCDKPASPRHYSPECDKSFLLSTPYPHYHLG  
 LLPDSDMTRYCMRFLTSSSPVACVSTRMDGWNSPPTSLALSTFLVERCSASMVRWEKLR  
 TWLFCSFCCAH

|    | start | end | width | seq                                                 | name     |
|----|-------|-----|-------|-----------------------------------------------------|----------|
| 1  | 1     | 103 | 103   | MNAYLTKQHSCSRGSDGMD . . KGNGCGERCACPHGWFSQAQ        | exon 3   |
| 2  | 104   | 121 | 18    | ASPAPIIVNTD TLD TIPY                                | exon 4   |
| 3  | 122   | 138 | 17    | VNGTEIEYEFEEITLER                                   | exon 5   |
| 4  | 139   | 179 | 41    | GNSGLGFSIAGGTDNPHIG . . GIFITKIIPGAAAEDGRL          | exon 6   |
| 5  | 180   | 180 | 1     | R                                                   |          |
| 6  | 181   | 236 | 56    | VNCILRVNEVDVSEVSHS . . RRRRPILETVVEIKLFGKPK         | exon 7   |
| 7  | 237   | 237 | 1     | G                                                   |          |
| 8  | 238   | 282 | 45    | LGFSIAGGVGNQHIPGDNS . . DGAAQKDGRLLQVGDRLLM         | exon 8   |
| 9  | 283   | 330 | 48    | VNYSLEEVTHEEAVAILK . . GKPTTIYMTDPYGGPDITH          | exon 9   |
| 10 | 331   | 331 | 1     | S                                                   |          |
| 11 | 332   | 376 | 45    | YSPPMENHLLSGNNGTLEY . . SPGRYSPIPKHMLGEDDYTR        | exon 10  |
| 12 | 377   | 377 | 1     | R                                                   |          |
| 13 | 378   | 428 | 51    | PPEPVYSTVNKLCDKPASPRHYSPECDKSFLLSTPYPHYHLG LLPDSDMT | exon 11  |
| 14 | 429   | 491 | 63    | RYCMRFLTSSSPVACVSTR . . MVRWEKLR TWLFCSFCCAH        | exon 11b |

### Q91XM9-6

>sp|Q91XM9-6|DLG2\_MOUSE Isoform 6 of Disks large homolog 2 OS=Mus musculus GN=Dlg2  
 MFASIWYAKKLGRRFVHNARKAKSEKASPAPIIVNTD TLD TIPYVNGTEIEYEFEEITL  
 RGNSGLGFSIAGGTDNPHIGDDPGIFITKIIPGAAAEDGRLRVNDCILRVNEVDVSEV  
 HSKAVEALKEAGSIVRLYVRRRRRPILETVVEIKLFGKPKGLGFSIAGGVGNQHIPGDNSI  
 YVTKIIDGAAQKDGRLLQVGDRLLMVNYSLEEVTHEEAVAILKNTSDVVYLKVGKPTTI  
 YMTDPYGGPDITHSYSPPMENHLLSGNNGTLEYKTSLPPISPGRYSPPIPKHMLGEDDYTR  
 PPEPVYSTVNKLCDKPASPRHYSPECDKSFLLSTPYPHYHLG LLPDSDMTSHSQHSTAT  
 RQPSVTLQRAISLEGEPRKVVHLKGSTGLGFNIVGGEDGEGIFVSVFILAGGPADLSGELQ  
 RGDQILSVNGIDLRGASHEQAAAALKGAGQVTIIAQYQPEDYARFEAKI HDLREQMMNH  
 SMSSGSGSLRTNQKRSLYVRAMFDYDKSKDGLPSQGLSFKYGDILHVINASDDEWWQAR  
 RVTLDGDSEEMGVIPSKRRVERKERARLKTVKFNAKPGVIDSKGDIPLGDDGYGKTLR  
 GQEDLILSYEPVTRQEIN YTRPVIILGPMKDRINDDLISEFPDKFGSCVPHTTRPKRDY  
 VDGRDYHFVISREQMEKDIQEHKFIEAGQYNDNLYGTSVQSVRFVAER GKHCILDVSGNA  
 IKRLQVAQLYPIAIFIKPKSLEPLMEMNKRLTEEQAKKTYDRAIKLEQEFGEYFTAIVQG  
 DTLEDIYNQCKLVIEEQSGPFIWIPSKEKL

|  | start | end | width | seq | name |
|--|-------|-----|-------|-----|------|
|--|-------|-----|-------|-----|------|



|    |     |     |    |                                          |             |
|----|-----|-----|----|------------------------------------------|-------------|
| 1  | 1   | 26  | 26 | MFASIWIYAKKLGRRFVHNARKAKSEK              | mCFEin2_cds |
| 2  | 27  | 44  | 18 | ASPAPIIVNTDTLDTIPY                       | exon 4      |
| 3  | 45  | 61  | 17 | VNGTEIEYEFEEITLER                        | exon 5      |
| 4  | 62  | 102 | 41 | GNSGLGFSIAGGTDNPHIG..GIFITKIIPGAAAEDGRL  | exon 6      |
| 5  | 103 | 103 | 1  | R                                        |             |
| 6  | 104 | 159 | 56 | VNDCILRVNEVDVSEVSHS..RRRPILETVVEIKLFGKPK | exon 7      |
| 7  | 160 | 160 | 1  | G                                        |             |
| 8  | 161 | 205 | 45 | LGFSIAGGVGNQHIPGDNS..DGGAAQKDGRLQVGDRLLM | exon 8      |
| 9  | 206 | 253 | 48 | VNNYSLEEVTHEEAVAILK..GKPTTIYMTDPYGPPDITH | exon 9      |
| 10 | 254 | 254 | 1  | S                                        |             |
| 11 | 255 | 299 | 45 | YSPPMENHLLSGNNGTLEY..SPGRYSPIPKHMLGEDDYT | exon 10     |
| 12 | 300 | 300 | 1  | R                                        |             |
| 13 | 301 | 351 | 51 | PPEPVYSTVNKLCDKPASP..LSTPYPHYHLGLLPDSDMT | exon 11     |
| 14 | 352 | 352 | 1  | S                                        |             |
| 15 | 353 | 374 | 22 | HSQHSTATRQPSVTLQRAISLE                   | exon 12     |
| 16 | 375 | 375 | 1  | G                                        |             |
| 17 | 376 | 427 | 52 | EPRKVVHLHGSTGLGFNIV..AGGPADLSGELQRGDQILS | exon 15     |
| 18 | 428 | 461 | 34 | VNGIDLRGASHEQAAAAALKGAGQVTIIAQYQPE       | exon 16     |
| 19 | 462 | 462 | 1  | D                                        |             |
| 20 | 463 | 476 | 14 | YARFEAKIHDLREQ                           | exon 18a    |
| 21 | 477 | 499 | 23 | MMNHSMSSGSGSLRTNQKRSLYV                  | exon 18b    |
| 22 | 500 | 500 | 1  | R                                        |             |
| 23 | 501 | 558 | 58 | AMFDYDKSKDSSLPSQGLS..RRVTLDGDSEEMGVIPSKR | exon 19     |
| 24 | 559 | 559 | 1  | R                                        |             |
| 25 | 560 | 584 | 25 | VERKERARLKTVKFNAKPGVIDSKG                | exon 20     |
| 26 | 585 | 599 | 15 | DIPGLGDDGYGKTL                           | exon 22     |
| 27 | 600 | 600 | 1  | R                                        |             |
| 28 | 601 | 616 | 16 | GQEDLILSYEPVTRQE                         | exon 24     |
| 29 | 617 | 617 | 1  | I                                        |             |
| 30 | 618 | 650 | 33 | NYTRPVIILGPMKDRINDDLISEFPDKFGSCVP        | exon 25     |
| 31 | 651 | 651 | 1  | H                                        |             |
| 32 | 652 | 708 | 57 | TTRPKRDYEVDRDYHFVI..YNDNLYGTSVQSVRFVAER  | exon 26     |
| 33 | 709 | 744 | 36 | GKHCILDVSGNAIKRLQVAQLYPIAIFIKPKSLEPL     | exon 27     |
| 34 | 745 | 745 | 1  | M                                        |             |
| 35 | 746 | 775 | 30 | EMNKRLTEEAKKTYDRAIKLEQEFGEYFT            | exon 28     |
| 36 | 776 | 776 | 1  | A                                        |             |
| 37 | 777 | 810 | 34 | IVQGDTLEDIYNQCKLVIEEQSGPFIWIPSKEKL       | exon 29     |

### Q91XM9-7, PSD-93 zeta

>sp|Q91XM9-7|DLG2\_MOUSE Isoform 7 of Disks large homolog 2 OS=Mus musculus GN=Dlg2  
MPVKKKDTDRALSLLEEYCKKLRKPEEQLLKNAVKKVMSIFKSSLFQALLDIQEFYEVTL  
LNSQKSCEQKIEEANHVAQKWEKTLLLDSCRDSLQKSSEHASCSPKENALYIEQNKENQ  
CSENETEEKTCQNGKCPAQNCSVEAPTWMPVHHCTKYRYQDEDGPHDHSPLRLTHEVRG  
PELVHVSEKNLSQIENVHGYVLQSHISPLKVNNGTEIEYEFEEITLERGNSGLGFSIAGGT  
DNPHIGDDPGIFITKIIPGAAAEDGRLRVNDCILRVNEVDVSEVSHSKAVEALKEAGSI  
VRLYVRRRRPILETVVEIKLFGKPKGLGFSIAGGVGNQHIPGDNSIYVTKIIDGGAAQKD  
GRLQVGDRLLMVNNYSLEEVTHEEAVAILKNTSDVVYLKVGKPTTIYMTDPYGPPDITHS  
YSPPMENHLLSGNNGTLEYKTSLPPISPGRYSPIPKHMLGEDDYTRPPEPVYSTVNKLCD  
KPASPRHYSPECDKSFLLSTPYPHYHLGLLPDSDMTSHSQHSTATRQPSVTLQRAISLE  
GEPRKVVHLHGSTGLGFNIVGGEDGEGIFVSFILAGGPADLSGELQRGDQILSVNGIDLR  
GASHEQAAAAALKGAGQVTIIAQYQPEYARFEAKIHDLREQMMNHSMSSGSGSLRTNQK  
RSLYVRAMFDYDKSKDSSLPSQGLSFYKGDILHVINASDDEWQARRVTLDGDSEEMGVI  
PSKRRVERKERARLKTVKFNAKPGVIDSKGDIPGLGDDGYGKTLRGQEDLILSYEPVTR  
QEINYTRPVIILGPMKDRINDDLISEFPDKFGSCVPHTTRPKRDYEVDRDYHFVISREQ  
MEKDIQEHKFIQYNDNLYGTSVQSVRFVAERGKHCILDVSGNAIKRLQVAQLYPIAIF  
FIKPKSLEPLMEMNKRLTEEAKKTYDRAIKLEQEFGEYFTAIVQGDTLEDIYNQCKLVI

EEQSGPFIWIPSKEKL

|    | start | end | width | seq                                       | name     |
|----|-------|-----|-------|-------------------------------------------|----------|
| 1  | 1     | 156 | 156   | MPVKKKDTDRALSLLEEYC..PAQNCSVEAPTWMPVHHCT  |          |
| 2  | 157   | 210 | 54    | KYRYQDEGDGPHDHSPLRLT..SQIENVHGYVLQSHISPLK | exon 2   |
| 3  | 211   | 227 | 17    | VNGTEIEYEFEEITLER                         | exon 5   |
| 4  | 228   | 268 | 41    | GNSGLGFSIAGGTDNPHIG..GIFITKIIPGAAAEDGRL   | exon 6   |
| 5  | 269   | 269 | 1     | R                                         |          |
| 6  | 270   | 325 | 56    | VNDCILRVNEVDVSEVSHS..RRRPILETVVEIKLFGKGP  | exon 7   |
| 7  | 326   | 326 | 1     | G                                         |          |
| 8  | 327   | 371 | 45    | LGFSIAGGVGNQHIPGDNS..DGGAAQKDGRLQVGDRLM   | exon 8   |
| 9  | 372   | 419 | 48    | VNNYSLEEVTHEEAVALIK..GKPTTIYMTDPYPPDITH   | exon 9   |
| 10 | 420   | 420 | 1     | S                                         |          |
| 11 | 421   | 465 | 45    | YSPPMENHLLSGNNGTLEY..SPGRYSPIPKHMLGEDDYT  | exon 10  |
| 12 | 466   | 466 | 1     | R                                         |          |
| 13 | 467   | 517 | 51    | PPEPVYSTVNKLCDKPASP..LSTPYPHYHLGLLPDSDMT  | exon 11  |
| 14 | 518   | 518 | 1     | S                                         |          |
| 15 | 519   | 540 | 22    | HSQHSTATRQPSVTLQRAISLE                    | exon 12  |
| 16 | 541   | 541 | 1     | G                                         |          |
| 17 | 542   | 593 | 52    | EPRKVVHLHGSTGLGFNIV..AGGPADLSGELQRGDQILS  | exon 15  |
| 18 | 594   | 627 | 34    | VNGIDLRGASHEQAAAALKGAGQTVTIIAQYQPE        | exon 16  |
| 19 | 628   | 628 | 1     | D                                         |          |
| 20 | 629   | 642 | 14    | YARFEAKIHDLREQ                            | exon 18a |
| 21 | 643   | 665 | 23    | MMNHSMSGSGSLRTNQKRSLYV                    | exon 18b |
| 22 | 666   | 666 | 1     | R                                         |          |
| 23 | 667   | 724 | 58    | AMFDYDKSKDGLPSQGLS..RRVTLDGDSEEMGVIPSKR   | exon 19  |
| 24 | 725   | 725 | 1     | R                                         |          |
| 25 | 726   | 750 | 25    | VERKERARLKTVKFNAKPGVIDSKG                 | exon 20  |
| 26 | 751   | 765 | 15    | DIPGLGDDGYGTKTL                           | exon 22  |
| 27 | 766   | 766 | 1     | R                                         |          |
| 28 | 767   | 782 | 16    | GQEDLILSYEPVTRQE                          | exon 24  |
| 29 | 783   | 783 | 1     | I                                         |          |
| 30 | 784   | 816 | 33    | NYTRPVIIIGPMKDRINDDLISEFPDKFGSCVP         | exon 25  |
| 31 | 817   | 817 | 1     | H                                         |          |
| 32 | 818   | 874 | 57    | TTRPKRDYEVDRDYHFVI..YNDNLYGTSVQSVRFVAER   | exon 26  |
| 33 | 875   | 910 | 36    | GKHCILDVSGNAIKRLQVAQLYPIAIFIKPKSLEPL      | exon 27  |
| 34 | 911   | 911 | 1     | M                                         |          |
| 35 | 912   | 941 | 30    | EMNKRLTEEQAKKTYDRAIKLEQEFGEYFT            | exon 28  |
| 36 | 942   | 942 | 1     | A                                         |          |
| 37 | 943   | 976 | 34    | IVQGDITLEDIYNQCKLVIEEQSGPFIWIPSKEKL       | exon 29  |

Using UniProt BLAST on UniProtKB/Swiss-Prot, MPVKKKDTDRALSLLEEYC..PAQNCSVEAPTWMPVHHCT aligns to the beginning of *DLG2* Q15700-2 isoform with E-value of  $1.1 \cdot 10^{-58}$ , Score: 510 and Ident.: 82.4%. The beginning of the human isoform corresponds to exons 3-6 of *DLG2*.

>

MPVKKKDTDRALSLLEEYCKKLRKPEEQLLKNAVKKVMS  
 IFKSSLFQALLDIQEFYEVTLNLSQKSCEQKIEEANHVA  
 QKWEKTLLLDSCRDSLQKSSEHASCSGPKENALYIEQNK  
 ENQCSENETEEKTCQNQGKCPAQNCSVEAPTWMPVHHCT

|          |    |                                                               |     |
|----------|----|---------------------------------------------------------------|-----|
| Query    | 38 | MSIFKSSLFQALLDIQEFYEVTLNLSQKSCEQKIEEANHVAQKWEKTLLLDSCRDSLQKS  | 97  |
|          |    | M IFKSSLFQALLDIQEFYEVTLNLSQKSCEQKIEEAN V QKWEK T L L C D LQKS |     |
| Q15700-2 | 1  | MGIFKSSLFQALLDIQEFYEVTLNLSQKSCEQKIEEANQVLQKWEKTSLLAPCHDRLQKS  | 60  |
| Query    | 98 | SEHASCSGPKENALYIEQNKENQCSENETEEKTCQNQGKCPAQNCSVEAPTWMPVHHCT   | 156 |
|          |    | SE CSG KENA IEQNKENQ ENET+E T QNQG+CPAQNCSVEAP WMPVHHCT       |     |
| Q15700-2 | 61 | SELTDCSGSKENASCIEQNKENQSFENETDETTTQNQGRCPAQNCSVEAPAWMPVHHCT   | 119 |

Q91XM9-8

>sp|Q91XM9-8|DLG2\_MOUSE Isoform 8 of Disks large homolog 2 OS=Mus musculus GN=Dlg2  
MFFACYCALRTNVK KYRYQDEGPHDHSPLRLTHEVRGPELVHVSEKNLSQIENVHGVVL  
QSHISPLKASPAPIIVNTDTLDTIPYVNGTEIEYEFEEITLERGNSGLGFSIAGGTDNPH  
IGDDPGIFITKIIPGGAAAEDGRLRVNDCILRVNEVDVSEVSHSKAVEALKEAGSIVRLY  
VRRRRPILETVVEIKLFGKPKGLGFSIAGGVGNQHIPGDNSIYVTKIIDGGAAQKDGRLQ  
VGDRLLMVNYSLEEVTHEEAVAILKNTSDVVYLKVGKPTTIYMTDPYPPDITHSYSP  
MENHLLSGNNGTLEYKTSPLPISPRYSPIPKHMLGEDDYTRPEPVYSTVNKLCDKPAS  
PRHYSPECDKSFLLSTPYPHYHLGLLPDSMTSHSQHSTATRQPSVTLQRAISLEGEPR  
KVVLHKGSTGLGFNIVGGEDGEGIFVSFILAGGPADLSGELQRGVINASVNRTGDRRIWH  
QGNGKAASSVSCLLPALFPNFVLDYARFEAKIHDLREQMMNHSMSGSGSLRTNQKRSLY  
VRAMFDYDKSKDGLPSQGLSFKYGDILHVINASDDEWWQARRVTLGDSEEMGVIPSKR  
RVERKERARLKTVKFNAPGVIDSKGDIPLGDDGYGKTLRGQEDLILSYEPVTRQEIN  
YTRPVIIILGPMKDRINDDLISEFPDKFGSCVPHTTRPKRDYEVDRDYHFVISREQMEKD  
IQEHKFIEAGQYNDNLYGTSVQSVRFVAERGKHCILDVSGNAIKRLQVAQLYPIAIFIKP  
KSLEPLMEMNKRLEEQAKKTYDRAIKLEQEFGEYFTAIVQGD TLEDIYNQCKLVIEEQS  
GPFIIWIPSKEKL

|    | start | end | width | seq                                       | name     |
|----|-------|-----|-------|-------------------------------------------|----------|
| 1  | 1     | 14  | 14    | MFFACYCALRTNVK                            | exon 1   |
| 2  | 15    | 68  | 54    | KYRYQDEGPHDHSPLRL..SQIENVHGVVLQSHISPLK    | exon 2   |
| 3  | 69    | 86  | 18    | ASPAPIIVNTDTLDTIPY                        | exon 4   |
| 4  | 87    | 103 | 17    | VNGTEIEYEFEEITLER                         | exon 5   |
| 5  | 104   | 144 | 41    | GNSGLGFSIAGGTDNPHIG..GIFITKIIPGGAAAEDGRL  | exon 6   |
| 6  | 145   | 145 | 1     | R                                         |          |
| 7  | 146   | 201 | 56    | VNDCILRVNEVDVSEVSHS..RRRRPILETVVEIKLFGKPK | exon 7   |
| 8  | 202   | 202 | 1     | G                                         |          |
| 9  | 203   | 247 | 45    | LGFSIAGGVGNQHIPGDNS..DGGAAQKDGRLQVGDRLLM  | exon 8   |
| 10 | 248   | 295 | 48    | VNYSLEEVTHEEAVAILK..GKPTTIYMTDPYPPDITH    | exon 9   |
| 11 | 296   | 296 | 1     | S                                         |          |
| 12 | 297   | 341 | 45    | YSPPMENHLLSGNNGTLEY..SPGRYSPIPKHMLGEDDYT  | exon 10  |
| 13 | 342   | 342 | 1     | R                                         |          |
| 14 | 343   | 393 | 51    | PPEPVYSTVNKLCDKPASP..LSTPYPHYHLGLLPDSMT   | exon 11  |
| 15 | 394   | 394 | 1     | S                                         |          |
| 16 | 395   | 416 | 22    | HSQHSTATRQPSVTLQRAISLE                    | exon 12  |
| 17 | 417   | 504 | 88    | GEPRKVVLHKGSTGLGFNI..AASSVSCLLPALFPNFVLD  |          |
| 18 | 505   | 518 | 14    | YARFEAKIHDLREQ                            | exon 18a |
| 19 | 519   | 541 | 23    | MMNHSMSGSGSLRTNQKRSLYV                    | exon 18b |
| 20 | 542   | 542 | 1     | R                                         |          |
| 21 | 543   | 600 | 58    | AMFDYDKSKDGLPSQGLS..RRVTLGDSEEMGVIPSKR    | exon 19  |
| 22 | 601   | 601 | 1     | R                                         |          |
| 23 | 602   | 626 | 25    | VERKERARLKTVKFNAPGVIDSKG                  | exon 20  |
| 24 | 627   | 641 | 15    | DIPGLGDDGYGKTL                            | exon 22  |
| 25 | 642   | 642 | 1     | R                                         |          |
| 26 | 643   | 658 | 16    | GQEDLILSYEPVTRQE                          | exon 24  |
| 27 | 659   | 659 | 1     | I                                         |          |
| 28 | 660   | 692 | 33    | NYTRPVIIILGPMKDRINDDLISEFPDKFGSCVP        | exon 25  |
| 29 | 693   | 693 | 1     | H                                         |          |
| 30 | 694   | 750 | 57    | TTRPKRDYEVDRDYHFVI..YNDNLYGTSVQSVRFVAER   | exon 26  |
| 31 | 751   | 786 | 36    | GKHCILDVSGNAIKRLQVAQLYPIAIFIKPKSLEPL      | exon 27  |
| 32 | 787   | 787 | 1     | M                                         |          |
| 33 | 788   | 817 | 30    | EMNKRLTEEQAkkTYDRAIKLEQEFGEYFT            | exon 28  |
| 34 | 818   | 818 | 1     | A                                         |          |
| 35 | 819   | 852 | 34    | IVQGD TLEDIYNQCKLVIEEQSGPFIIWIPSKEKL      | exon 29  |

Using UniProt BLAST on UniProtKB/Swiss-Prot, GEPRKVVLHKGSTGLGFNI..AASSVSCLLPALFPNFVLD aligns to *DLG2* Q15700-3 isoform with E-value of  $7.3 \cdot 10^{-25}$ , Score: 253 and Ident.: 81.5%. The beginning of the

sequence corresponds approximately to *DLG2* exon 20.

>

GEPRKVVHLHKGSTGLGFNIVGGEDGEGEGIFV  
SFILAGGPADLSGELQRGVINASVNRTGDR  
RIWHQGNGKAASSVSCLLPALFPNFVLD

|          |     |                                                                 |     |
|----------|-----|-----------------------------------------------------------------|-----|
| Query    | 1   | GEPRKVVHLHKGSTGLGFNIVGGEDGEGEGIFVSFILAGGPADLSGELQRGVINASVNRTGDR | 60  |
|          |     | GEPRKVVHLHKGSTGLGFNIVGGEDGEGEGIFVSFILAGGPADLSGELQRG SVN R       |     |
| Q15700-3 | 314 | GEPRKVVHLHKGSTGLGFNIVGGEDGEGEGIFVSFILAGGPADLSGELQRGDQILSVNGIDLR | 373 |
| Query    | 61  | RIWHQ                                                           | 65  |
|          |     | H+                                                              |     |
| Q15700-3 | 374 | GASHE                                                           | 378 |

## Supplementary Note 5

Using the exon-amino-acid mapping in Supplementary Note 3, we map the predicted *DLG2* isoform from NCBI BLAST database to exons. For this mapping, we assume this additional exon-AA mapping:

exon 28 e26-Q]HVSSNASDSESSY [R-e29

### UniProt *DLG2* predicted isoforms inspection

XP\_016872766

>XP\_016872766

```
MFASIWYAKKLGRRFVHNARKAKSEKASPAPIIVNTDTLDTIPY
VNGTEIEYEFEEITLERGNSGLGFSIAGGTDNPHIGDDPGIFITKIIPGAAAEDGRL
RVNDCILRVNEVDVSEVSHSKAVEALKEAGSIVRLYVRRRRPILETVVEIKLFGKPKG
LGFSIAGGVGNQHIPGDNISYVTKIIDGGAAQKDGRLQVGDRLLMVNYSLEEVTHEE
AVAILKNTSEVVYLKVGKPTTIYMTDPYGGPDITHSYSPMENHLLSGNNGTLEYKTS
LPPISPGRYSPIPKHMLVDDDDYTRPPEPVYSTVNKLCDKPASP RHYSPECDKSFLLS
APYSHYHLGLLPDSEMTSHSQHSTATRQPSMTLQRAVSLEGEPRKVVLHKGSTGLGFN
IVGGEDGEGIFVFSFILAGGPADLSGELQRGDQILSVNGIDLRGASHEQAAAALKGAGQ
TVTIIAQYQPEDYARFEAKIHDLREQMMNHSMSGSLRTNQKRSLYVRAMFDYDKS
KDSGLPSQGLSFKYGDILHVINASDDEWWQARRVMLEGDSEEMGVIPSKRRVERKERA
RLKTVKFNAPGVIDSKGSFNDRKKSFIKSRKFPFYKNKEQSEQETS DPEQHVSSNA
SDSESSYRGQEDLILSYEPVTRQEINYTRPVIILGPMKDRINDDLISEFPDKFGSCVP
HTTRPKRDYEVDRDYHFVISREQMEKDIQEHKFIAGQYNDNLYGTSVQSVRFVAER
GKHCILDVSGNAIKRLQVAQLYPIAIFIKPRSLLEPLMEMNKRLTEEQAKKTYDRAIKL
EQEFGYFTAIVQGD TLEDIYNQCKLVIEEQSGPFIWIPSKEKL
```

|    | start | end | width | seq                                       | name       |
|----|-------|-----|-------|-------------------------------------------|------------|
| 1  | 1     | 26  | 26    | MFASIWYAKKLGRRFVHNARKAKSEK                | CFEIn8_cds |
| 2  | 27    | 44  | 18    | ASPAPIIVNTDTLDTIPY                        | exon 11    |
| 3  | 45    | 61  | 17    | VNGTEIEYEFEEITLER                         | exon 12    |
| 4  | 62    | 102 | 41    | GNSGLGFSIAGGTDNPHIG..GIFITKIIPGAAAEDGRL   | exon 13    |
| 5  | 103   | 103 | 1     | R                                         |            |
| 6  | 104   | 159 | 56    | VNDCILRVNEVDVSEVSHS..RRRPILETVVEIKLFGKPK  | exon 14    |
| 7  | 160   | 160 | 1     | G                                         |            |
| 8  | 161   | 205 | 45    | LGFSIAGGVGNQHIPGDNIS..DGGAAQKDGRLQVGDRLLM | exon 15    |
| 9  | 206   | 253 | 48    | VNYSLEEVTHEEAVAILK..GKPTTIYMTDPYGGPDITH   | exon 16    |
| 10 | 254   | 254 | 1     | S                                         |            |
| 11 | 255   | 299 | 45    | YSPPMENHLLSGNNGTLEY..SPGRYSPIPKHMLVDDDDYT | exon 17    |
| 12 | 300   | 300 | 1     | R                                         |            |
| 13 | 301   | 351 | 51    | PPEPVYSTVNKLCDKPASP..LSAPYSHYHLGLLPDSEMT  | exon 18    |
| 14 | 352   | 352 | 1     | S                                         |            |
| 15 | 353   | 374 | 22    | HSQHSTATRQPSMTLQRAVSLE                    | exon 19    |
| 16 | 375   | 375 | 1     | G                                         |            |
| 17 | 376   | 427 | 52    | EPRKVVLHKGSTGLGFNIV..AGGPADLSGELQRGDQILS  | exon 20    |
| 18 | 428   | 461 | 34    | VNGIDLRGASHEQAAAALKGAGQTVTIIAQYQPE        | exon 21    |
| 19 | 462   | 462 | 1     | D                                         |            |
| 20 | 463   | 476 | 14    | YARFEAKIHDLREQ                            | exon 23a   |
| 21 | 477   | 499 | 23    | MMNHSMSGSLRTNQKRSLYV                      | exon 23b   |
| 22 | 500   | 500 | 1     | R                                         |            |
| 23 | 501   | 558 | 58    | AMFDYDKSKDSGLPSQGLS..RRVMLEGDSEEMGVIPSKR  | exon 24    |
| 24 | 559   | 559 | 1     | R                                         |            |
| 25 | 560   | 584 | 25    | VERKERARLKTVKFNAPGVIDSKG                  | exon 25    |
| 26 | 585   | 617 | 33    | SFNDRKKSFIKSRKFPFYKNKEQSEQETS DPE         | exon 26    |
| 27 | 618   | 618 | 1     | Q                                         |            |
| 28 | 619   | 631 | 13    | HVSSNASDSESSY                             | exon 28    |
| 29 | 632   | 632 | 1     | R                                         |            |

|    |         |    |                                              |         |
|----|---------|----|----------------------------------------------|---------|
| 30 | 633 648 | 16 | GQEDLILSYEPVTRQE                             | exon 29 |
| 31 | 649 649 | 1  | I                                            |         |
| 32 | 650 682 | 33 | NYTRPVIILGPMKDRINDDLISEFPDKFGSCVP            | exon 30 |
| 33 | 683 683 | 1  | H                                            |         |
| 34 | 684 740 | 57 | TTRPKRDYEV DGRDYHFVI . . YNDNLYGTSVQSVRFVAER | exon 31 |
| 35 | 741 776 | 36 | GKHCILDVSGNAIKRLQVAQLYPIAIFIKPRSLEPL         | exon 32 |
| 36 | 777 777 | 1  | M                                            |         |
| 37 | 778 807 | 30 | EMNKRLTEEQAKKTYDRAIKLEQEFGEYFT               | exon 33 |
| 38 | 808 808 | 1  | A                                            |         |
| 39 | 809 842 | 34 | IVQGD TLEDIYNQCKLVIEEQSGPFIWIPSKEKL          | exon 34 |

**XP\_016872772**

>XP\_016872772

MFASIWYAKKLGRRFVHNARKAKSEKASPAPIIVNTDTLDTIPY  
VNGTEIEYEFEEITLERGNSGLGFSIAGGTDNPHIGDDPGIFITKIIPGAAAEDGRL  
RVNDCILRVNEVDVSEVSHSKAVEALKEAGSIVRLYVRRRRP ILETVVEIKLFGKPKG  
LGFSIAGGVGNQHIPGDNSIYVTKIIDGGAAQKDGRLQVGDRLLMVNNYSLEEVTHEE  
AVAILKNTSEVVYLKVGKPTTIYMTDPYGPDDITHSYSPPMENHLLSGNNGTLEYKTS  
LPPISPGRYSPIPKHMLVDDDYTRPPEPVYSTVNKLCDKPASP RHYPVECDKSFLLS  
APYSHYHLGLLPDSEMTSHSQHSTATRQPSMTLQRAVSLEGEPRKVVLHKGSTGLGFN  
IVGGEDGEGIFVFSFILAGGPADLSGELQRGDQILSVNGIDLRGASHEQAAAALKGAGQ  
TVTIIAQYQPEDYARFEAKIHDRLREQMMNHSMSGSLRTNQKRSLYVRAMFDYDKS  
KDSGLPSQGLSFKYGDILHVINASDDEWWQARRVMLEGDSEEMGVIPSKRRVERKERA  
RLKTVKFNAPGVIDSKGIDPGLGDDGYGKTLRGQEDLILSYEPVTRQEINYTRPVI  
ILGPMKDRINDDLISEFPDKFGSCVPHTTRPKRDYEV DGRDYHFVISREQMEKDIQEH  
KFI EAGQYNDNLYGTSVQSVRFVAER GKHCILDVSGNAIKRLQVAQLYPIAIFIKPRS  
LEPLMEMNKRLTEEQAKKTYDRAIKLEQEFGEYFTAIVQGD TLEDIYNQCKLVIEEQS  
GPFIIWIPSKEKL

|    | start | end | width | seq                                         | name       |
|----|-------|-----|-------|---------------------------------------------|------------|
| 1  | 1     | 26  | 26    | MFASIWYAKKLGRRFVHNARKAKSEK                  | CFEin8_cds |
| 2  | 27    | 44  | 18    | ASPAPIIVNTDTLDTIPY                          | exon 11    |
| 3  | 45    | 61  | 17    | VNGTEIEYEFEEITLER                           | exon 12    |
| 4  | 62    | 102 | 41    | GNSGLGFSIAGGTDNPHIG . . GIFITKIIPGAAAEDGRL  | exon 13    |
| 5  | 103   | 103 | 1     | R                                           |            |
| 6  | 104   | 159 | 56    | VNDCILRVNEVDVSEVSHS . . RRRPILETVVEIKLFGKPK | exon 14    |
| 7  | 160   | 160 | 1     | G                                           |            |
| 8  | 161   | 205 | 45    | LGFSIAGGVGNQHIPGDNS . . DGGAAQKDGRLQVGDRLLM | exon 15    |
| 9  | 206   | 253 | 48    | VNNYSLEEVTHEEAVAILK . . GKPTTIYMTDPYGPDDITH | exon 16    |
| 10 | 254   | 254 | 1     | S                                           |            |
| 11 | 255   | 299 | 45    | YSPPMENHLLSGNNGTLEY . . SPGRYSPIPKHMLVDDDYT | exon 17    |
| 12 | 300   | 300 | 1     | R                                           |            |
| 13 | 301   | 351 | 51    | PPEPVYSTVNKLCDKPASP . . LSAPYSHYHLGLLPDSEMT | exon 18    |
| 14 | 352   | 352 | 1     | S                                           |            |
| 15 | 353   | 374 | 22    | HSQHSTATRQPSMTLQRAVSLE                      | exon 19    |
| 16 | 375   | 375 | 1     | G                                           |            |
| 17 | 376   | 427 | 52    | EPRKVVLHKGSTGLGFNIV . . AGGPADLSGELQRGDQILS | exon 20    |
| 18 | 428   | 461 | 34    | VNGIDLRGASHEQAAAALKGAGQTVTIIAQYQPE          | exon 21    |
| 19 | 462   | 462 | 1     | D                                           |            |
| 20 | 463   | 476 | 14    | YARFEAKIHDRLREQ                             | exon 23a   |
| 21 | 477   | 499 | 23    | MMNHSMSGSLRTNQKRSLYV                        | exon 23b   |
| 22 | 500   | 500 | 1     | R                                           |            |
| 23 | 501   | 558 | 58    | AMFDYDKSKDSGLPSQGLS . . RRVMLEGDSEEMGVIPSKR | exon 24    |
| 24 | 559   | 559 | 1     | R                                           |            |
| 25 | 560   | 584 | 25    | VERKERARLKTVKFNAPGVIDSKG                    | exon 25    |
| 26 | 585   | 599 | 15    | DIPGLGDDGYGKTL                              | exon 27    |

|    |     |     |    |                                          |   |         |
|----|-----|-----|----|------------------------------------------|---|---------|
| 27 | 600 | 600 | 1  |                                          | R |         |
| 28 | 601 | 616 | 16 | GQEDLILSYEPVTRQE                         |   | exon 29 |
| 29 | 617 | 617 | 1  |                                          | I |         |
| 30 | 618 | 650 | 33 | NYTRPVIIILGPMKDRINDDLISEFPDKFGSCVP       |   | exon 30 |
| 31 | 651 | 651 | 1  |                                          | H |         |
| 32 | 652 | 708 | 57 | TTRPKRDYEVDGRDYHFVI..YNDNLYGTSVQSVRFVAER |   | exon 31 |
| 33 | 709 | 744 | 36 | GKHCILDVSGNAIKRLQVAQLYPIAIFIKPRSLEPL     |   | exon 32 |
| 34 | 745 | 745 | 1  |                                          | M |         |
| 35 | 746 | 775 | 30 | EMNKRLTEEQAKKTYDRAIKLEQEFGEYFT           |   | exon 33 |
| 36 | 776 | 776 | 1  |                                          | A |         |
| 37 | 777 | 810 | 34 | IVQGDTLEDIYNQCKLVIEEQSGPFIWIPSKEKL       |   | exon 34 |

**XP\_016872770**

>XP\_016872770

MSPVVKDPDCFTPMICHCKVACTNNTLSLMFGCKKYRYQDEDAP  
HDHSLPRLTHEVRGPELVHVSEKNLSQIENVHGYVLQSHISPLKASPAPIIVNTDTLD  
TIPYVNGTEIEYEFEEITLERGNSGLGFSIAGGTDNPHIGDDPGIFITKIIPGAAAE  
DGRLRVNDCILRVNEVDVSEVSHSKAVEALKEAGSIVRLYVRRRRPILETVVEIKLFK  
GPKGLGFSIAGGVGNQHIPGDNSIYVTKIIDGAAQKDGRLQVGDRLLMVNYSLEEV  
THEEAVAILKNTSEVVYLKVGKPTTIYMTDPYGGPDITHSYSPPMENHLLSGNNGTLE  
YKTSLPPISPGRYSPIPKHMLVDDDYTSQHSQHSTATRQPSMTLQRAVSLEGEPRKVVL  
HKGSTGLGFNIVGGEDGEGIFVSFILAGGPADLSGELQRGDQILSVNGIDLRGASHEQ  
AAAALKGAGQVTIIAQYQPEDYARFEAKIHDLREQMMNHSMSGSGSLRTNQKRSLY  
VRAMFDYDKSKDGLPSQGLSFKYGDILHVINASDDEWQARRVMLEGDSEEMGVIPS  
KRRVERKERARLKTVKFNAKPGVIDSKGDIPGLGDDGYGKTLRGQEDLILSYEPVTR  
QEINYTRPVIIILGPMKDRINDDLISEFPDKFGSCVPHTTRPKRDYEVDGRDYHFVISR  
EQMEKDIQEHKFIAGQYNDNLYGTSVQSVRFVAERGKHCILDVSGNAIKRLQVAQLY  
PIAIFIKPRSLEPLMEMNKRLTEEQAKKTYDRAIKLEQEFGEYFTAIVQGDTLEDIYN  
QCKLVIEEQSGPFIWIPSKEKL

|    | start | end | width | seq                                      | name       |
|----|-------|-----|-------|------------------------------------------|------------|
| 1  | 1     | 34  | 34    | MSPVVKDPDCFTPMICHCKVACTNNTLSLMFGCK       | CFEin7_cds |
| 2  | 35    | 88  | 54    | KYRYQDEDAPHDHSLPRLT..SQIENVHGYVLQSHISPLK | exon 8     |
| 3  | 89    | 106 | 18    | ASPAPIIVNTDTLDTIPY                       | exon 11    |
| 4  | 107   | 123 | 17    | VNGTEIEYEFEEITLER                        | exon 12    |
| 5  | 124   | 164 | 41    | GNSGLGFSIAGGTDNPHIG..GIFITKIIPGAAAEEDGRL | exon 13    |
| 6  | 165   | 165 | 1     | R                                        |            |
| 7  | 166   | 221 | 56    | VNDCILRVNEVDVSEVSHS..RRRPILETVVEIKLFKGPK | exon 14    |
| 8  | 222   | 222 | 1     | G                                        |            |
| 9  | 223   | 267 | 45    | LGFSIAGGVGNQHIPGDNS..DGGAAQKDGRLQVGDRLLM | exon 15    |
| 10 | 268   | 315 | 48    | VNYSLEEVTHEEAVAILK..GKPTTIYMTDPYGGPDITH  | exon 16    |
| 11 | 316   | 316 | 1     | S                                        |            |
| 12 | 317   | 361 | 45    | YSPPMENHLLSGNNGTLEY..SPGRYSPIPKHMLVDDDYT | exon 17    |
| 13 | 362   | 362 | 1     | S                                        |            |
| 14 | 363   | 384 | 22    | HSQHSTATRQPSMTLQRAVSLE                   | exon 19    |
| 15 | 385   | 385 | 1     | G                                        |            |
| 16 | 386   | 437 | 52    | EPRKVVLHKGSTGLGFNIV..AGGPADLSGELQRGDQILS | exon 20    |
| 17 | 438   | 471 | 34    | VNGIDLRGASHEQAAAALKGAGQVTIIAQYQPE        | exon 21    |
| 18 | 472   | 472 | 1     | D                                        |            |
| 19 | 473   | 486 | 14    | YARFEAKIHDLREQ                           | exon 23a   |
| 20 | 487   | 509 | 23    | MMNHSMSGSGSLRTNQKRSLYV                   | exon 23b   |
| 21 | 510   | 510 | 1     | R                                        |            |
| 22 | 511   | 568 | 58    | AMFDYDKSKDGLPSQGLS..RRVMLEGDSEEMGVIPSKR  | exon 24    |
| 23 | 569   | 569 | 1     | R                                        |            |
| 24 | 570   | 594 | 25    | VERKERARLKTVKFNAKPGVIDSKG                | exon 25    |
| 25 | 595   | 609 | 15    | DIPGLGDDGYGKTL                           | exon 27    |

|    |     |     |    |  |                                          |         |
|----|-----|-----|----|--|------------------------------------------|---------|
| 26 | 610 | 610 | 1  |  | R                                        |         |
| 27 | 611 | 626 | 16 |  | GQEDLILSYEPVTRQE                         | exon 29 |
| 28 | 627 | 627 | 1  |  | I                                        |         |
| 29 | 628 | 660 | 33 |  | NYTRPVIIILGPMKDRINDDLISEFPDKFGSCVP       | exon 30 |
| 30 | 661 | 661 | 1  |  | H                                        |         |
| 31 | 662 | 718 | 57 |  | TTRPKRDYEVDGRDYHFVI..YNDNLYGTSVQSVRFVAER | exon 31 |
| 32 | 719 | 754 | 36 |  | GKHCILDVSGNAIKRLQVAQLYPIAIFIKPRSLEPL     | exon 32 |
| 33 | 755 | 755 | 1  |  | M                                        |         |
| 34 | 756 | 785 | 30 |  | EMNKRLTEEQAKKTYDRAIKLEQEFGEYFT           | exon 33 |
| 35 | 786 | 786 | 1  |  | A                                        |         |
| 36 | 787 | 820 | 34 |  | IVQGDTLEDIYNQCKLVIEEQSGPFIWIPSKEKL       | exon 34 |

**XP\_016872753**

>XP\_016872753

MSPVVKDPDCFTPMICHCKVACTNNTLSLMFGCKKYRYQDEDAP  
HDHSLPRLTHEVRGPPELVHSEKNLSQIENVHGYVLQSHISPLKASPAPIIVNTDTLD  
TIPYVNGTEIEYEFEEITLERGNSGLGFSIAGGTDNPHIGDDPGIFITKIIPGAAAE  
DGRLRVNDCILRVNEVDVSEVSHSKAVEALKEAGSIVRLYVRRRRILETVVEIKLFGK  
GPKGLGFSIAGGVGNQHIPGDNSIYVTKIIDGAAQKDGRLQVGDRLLMVNNYSLEEV  
THEEAVAILKNTSEVVYLKVGKPTTIYMTDPYPPDITHSYSPPMENHLLSGNNGTLE  
YKTSLPPISPGRYSPIPKHMLVDDDYTRPPEPVYSTVNKLCDKPASPRHYSPVECDKS  
FLLSAPYSHYHLGLLPDSEMTSHSQHSTATRQPSMTLQRAVSLEGEPRKVVHLKGSTG  
LGFNIVGGEDGEGIFVSFILAGGPADLSGELQRGDQILSVNGIDLRGASHEQAAAALK  
GAGQTVTIIAQYQPEDYARFEAKIHDLREQMMNHSMSSGSLRTNQKRSLYVRAMFD  
YDKSKDGLPSQGLSFYKGDILHVINASDDEWWQARRVMLEGDSEEMGVIPSKRRVER  
KERARLKTVKFNAPKGYVIDSKGSFNDRKKSIFSRKFPFYKNKEQSEQETSDEPEQHV  
SSNASDSESSYRQEDLILSYEPVTRQEINYTRPVIIILGPMKDRINDDLISEFPDKFG  
SCVPHTTRPKRDYEVDGRDYHFVISREQMEKDIQEHKFIAGQYNDNLYGTSVQSVRF  
VAERGKHCILDVSGNAIKRLQVAQLYPIAIFIKPRSLEPLMEMNKRLTEEQAKKTYDR  
AIKLEQEFGEYFTAIVQGDTLEDIYNQCKLVIEEQSGPFIWIPSKEKL

|    | start | end | width | seq                                      | name       |
|----|-------|-----|-------|------------------------------------------|------------|
| 1  | 1     | 34  | 34    | MSPVVKDPDCFTPMICHCKVACTNNTLSLMFGCK       | CFEin7_cds |
| 2  | 35    | 88  | 54    | KYRYQEDAPHDHSLPRLT..SQIENVHGYVLQSHISPLK  | exon 8     |
| 3  | 89    | 106 | 18    | ASPAPIIVNTDTLDTIPY                       | exon 11    |
| 4  | 107   | 123 | 17    | VNGTEIEYEFEEITLER                        | exon 12    |
| 5  | 124   | 164 | 41    | GNSGLGFSIAGGTDNPHIG..GIFITKIIPGAAAEDGRL  | exon 13    |
| 6  | 165   | 165 | 1     | R                                        |            |
| 7  | 166   | 221 | 56    | VNDCILRVNEVDVSEVSHS..RRRRILETVVEIKLFGKPK | exon 14    |
| 8  | 222   | 222 | 1     | G                                        |            |
| 9  | 223   | 267 | 45    | LGFSIAGGVGNQHIPGDNS..DGGAAQKDGRLQVGDRLLM | exon 15    |
| 10 | 268   | 315 | 48    | VNNYSLEEVTHEEAVAILK..GKPTTIYMTDPYPPDITH  | exon 16    |
| 11 | 316   | 316 | 1     | S                                        |            |
| 12 | 317   | 361 | 45    | YSPPMENHLLSGNNGTLEY..SPGRYSPIPKHMLVDDDYT | exon 17    |
| 13 | 362   | 362 | 1     | R                                        |            |
| 14 | 363   | 413 | 51    | PPEPVYSTVNKLCDKPASP..LSAPYSHYHLGLLPDSEMT | exon 18    |
| 15 | 414   | 414 | 1     | S                                        |            |
| 16 | 415   | 436 | 22    | HSQHSTATRQPSMTLQRAVSLE                   | exon 19    |
| 17 | 437   | 437 | 1     | G                                        |            |
| 18 | 438   | 489 | 52    | EPRKVVHLKGSTGLGFNIV..AGGPADLSGELQRGDQILS | exon 20    |
| 19 | 490   | 523 | 34    | VNGIDLRGASHEQAAAALKGAGQTVTIIAQYQPE       | exon 21    |
| 20 | 524   | 524 | 1     | D                                        |            |
| 21 | 525   | 538 | 14    | YARFEAKIHDLREQ                           | exon 23a   |
| 22 | 539   | 561 | 23    | MMNHSMSSGSLRTNQKRSLYV                    | exon 23b   |
| 23 | 562   | 562 | 1     | R                                        |            |
| 24 | 563   | 620 | 58    | AMFDYDKSKDGLPSQGLS..RRVMLEGDSEEMGVIPSKR  | exon 24    |



|    |     |     |    |                                            |   |         |
|----|-----|-----|----|--------------------------------------------|---|---------|
| 25 | 621 | 621 | 1  |                                            | R |         |
| 26 | 622 | 646 | 25 | VERKERARLKTVKFNAPGVIDSKG                   |   | exon 25 |
| 27 | 647 | 679 | 33 | SFNDKRKKSFIKSRKFFYKNKEQSEQETS DPE          |   | exon 26 |
| 28 | 680 | 680 | 1  |                                            | Q |         |
| 29 | 681 | 693 | 13 | HVSSNASDSESSY                              |   | exon 28 |
| 30 | 694 | 694 | 1  |                                            | R |         |
| 31 | 695 | 710 | 16 | GQEDLILSYEPVTRQE                           |   | exon 29 |
| 32 | 711 | 711 | 1  |                                            | I |         |
| 33 | 712 | 744 | 33 | NYTRPVIILGPMKDRINDDLISEFPDKFGSCVP          |   | exon 30 |
| 34 | 745 | 745 | 1  |                                            | H |         |
| 35 | 746 | 802 | 57 | TTRPKRDYEVDGRDYHFVI. . YNDNLYGTSVQSVRFVAER |   | exon 31 |
| 36 | 803 | 838 | 36 | GKHCILDVSGNAIKRLQVAQLYPIAIFIKPRSLEPL       |   | exon 32 |
| 37 | 839 | 839 | 1  |                                            | M |         |
| 38 | 840 | 869 | 30 | EMNKRLTEEQAKKTYDRAIKLEQEFGEYFT             |   | exon 33 |
| 39 | 870 | 870 | 1  |                                            | A |         |
| 40 | 871 | 904 | 34 | IVQGDTLEDIYNQCKLVIEEQSGPFIWIPSKEKL         |   | exon 34 |

**XP\_016872760**

>XP\_016872760

MSPVVKDPDCFTPMICHCKVACTNNTLSLMFGCKKYRYQDEDAP  
HDHSLPRLTHEVRGPELVHVSEKNLSQIENVHGYVLQSHISPLKASPAPIIVNTDTLD  
TIPYVNGTEIEYEFEEITLERGNSGLGFSIAGGTDNPHIGDDPGIFITKIIPGGAAAE  
DGRLRVNDCILRVNEVDVSEVSHSKAVEALKEAGSIVRLYVRRRRPILETVVEIKLKF  
GPKGLGFSIAGGVGNQHIPGDNSIYVTKIIDGGAAQKDGRQLQVGDRLLMVNYSLEEV  
THEEAVAILKNTSEVVYLKVGKPTTIYMTDPYGGPDITHSYSPPMENHLLSGNNGTLE  
YKTSLPPISPGRYSPIPKHMLVDDDYTRPPEPVYSTVNKLCDKPASPRHYSPECDKS  
FLLSAPYSHYHLGLLPDSEMTSHSQHSTATRQPSMTLQRAVSLEGEPRKVVHLKGSTG  
LGFNIVGGEDGEGIFVSFILAGGPADLSGELQRGDQILSVNGIDLRGASHEQAAAALK  
GAGQTVTIIAQYQPEDYARFEAKIHDLREQMMNHSMSGSLRTNQKRSLYVRAMFD  
YDKSKDGLPSQGLSFYKGDILHVINASDDEWQARRVMEGDSEEMGVIPSKRRVER  
KERARLKTVKFNAPGVIDSKGDIPGLGDDGYGKTLRGQEDLILSYEPVTRQEINYT  
RPVIILGPMKDRINDDLISEFPDKFGSCVPHTTRPKRDYEVDGRDYHFVISREQMEKD  
IQEHKFIAGQYNDNLYGTSVQSVRFVAERGKHCILDVSGNAIKRLQVAQLYPIAIFI  
KPRSLEPLMEMNKRLTEEQAKKTYDRAIKLEQEFGEYFTAIVQGDTLEDIYNQCKLVI  
EEQSGPFIWIPSKEKL

|    | start | end | width | seq                                        | name       |
|----|-------|-----|-------|--------------------------------------------|------------|
| 1  | 1     | 34  | 34    | MSPVVKDPDCFTPMICHCKVACTNNTLSLMFGCK         | CFEIn7_cds |
| 2  | 35    | 88  | 54    | KYRYQDEDAPHDHSLPRLT. .SQIENVHGYVLQSHISPLK  | exon 8     |
| 3  | 89    | 106 | 18    | ASPAPIIVNTDTLDTIPY                         | exon 11    |
| 4  | 107   | 123 | 17    | VNGTEIEYEFEEITLER                          | exon 12    |
| 5  | 124   | 164 | 41    | GNSGLGFSIAGGTDNPHIG. .GIFITKIIPGGAAEDGRL   | exon 13    |
| 6  | 165   | 165 | 1     | R                                          |            |
| 7  | 166   | 221 | 56    | VNDCILRVNEVDVSEVSHS. .RRRPILETVVEIKLKFKGPK | exon 14    |
| 8  | 222   | 222 | 1     | G                                          |            |
| 9  | 223   | 267 | 45    | LGFSIAGGVGNQHIPGDNS. .DGGAAQKDGRQLQVGDRLLM | exon 15    |
| 10 | 268   | 315 | 48    | VNYSLEEVTHEEAVAILK. .GKPTTIYMTDPYGGPDITH   | exon 16    |
| 11 | 316   | 316 | 1     | S                                          |            |
| 12 | 317   | 361 | 45    | YSPPMENHLLSGNNGTLEY. .SPGRYSPIPKHMLVDDDYT  | exon 17    |
| 13 | 362   | 362 | 1     | R                                          |            |
| 14 | 363   | 413 | 51    | PPEPVYSTVNKLCDKPASP. .LSAPYSHYHLGLLPDSEMT  | exon 18    |
| 15 | 414   | 414 | 1     | S                                          |            |
| 16 | 415   | 436 | 22    | HSQHSTATRQPSMTLQRAVSLE                     | exon 19    |
| 17 | 437   | 437 | 1     | G                                          |            |
| 18 | 438   | 489 | 52    | EPRKVVHLKGSTGLGFNIV. .AGGPADLSGELQRGDQILS  | exon 20    |
| 19 | 490   | 523 | 34    | VNGIDLRGASHEQAAAALKGAGQTVTIIAQYQPE         | exon 21    |

|    |     |     |    |                                           |                                      |          |
|----|-----|-----|----|-------------------------------------------|--------------------------------------|----------|
| 20 | 524 | 524 | 1  |                                           | D                                    |          |
| 21 | 525 | 538 | 14 |                                           | YARFEAKIHDLREQ                       | exon 23a |
| 22 | 539 | 561 | 23 |                                           | MMNHSMSSGSGSLRTNQKRSLYV              | exon 23b |
| 23 | 562 | 562 | 1  |                                           | R                                    |          |
| 24 | 563 | 620 | 58 | AMFDYDKSKDSGLPSQGLS. .RRVMLEGDSEEMGVIPSKR |                                      | exon 24  |
| 25 | 621 | 621 | 1  |                                           | R                                    |          |
| 26 | 622 | 646 | 25 |                                           | VERKERARLKTVKFNAKPGVIDSKG            | exon 25  |
| 27 | 647 | 661 | 15 |                                           | DIPGLGDDGYGTKTL                      | exon 27  |
| 28 | 662 | 662 | 1  |                                           | R                                    |          |
| 29 | 663 | 678 | 16 |                                           | GQEDLILSYEPVTRQE                     | exon 29  |
| 30 | 679 | 679 | 1  |                                           | I                                    |          |
| 31 | 680 | 712 | 33 |                                           | NYTRPVIIILGPMKDRINDDLISEFPDKFGSCVP   | exon 30  |
| 32 | 713 | 713 | 1  |                                           | H                                    |          |
| 33 | 714 | 770 | 57 | TTRPKRDYEVDRDYHFVI. .YNDNLYGTSVQSVRFVAER  |                                      | exon 31  |
| 34 | 771 | 806 | 36 |                                           | GKHCILDVSGNAIKRLQVAQLYPIAIFIKPRSLEPL | exon 32  |
| 35 | 807 | 807 | 1  |                                           | M                                    |          |
| 36 | 808 | 837 | 30 |                                           | EMNKRLTEEQAkkTYDRAIKLEQEFGEYFT       | exon 33  |
| 37 | 838 | 838 | 1  |                                           | A                                    |          |
| 38 | 839 | 872 | 34 |                                           | IVQGDTLEDIYNQCKLVIEEQSGPFIWIPSKEKL   | exon 34  |

**XP\_016872754**

>XP\_016872754

MSPVVKDPCFTPMICHCKVACTNNTLSLMFGCKYRYQDEDAPH  
DHS L PRLTHEVRGPELVHVSEKNLSQIENVHGYVLQSHISPLKASPAPIIVNTDTLDT  
IPYVNGTEIEYEFEEITLERGNSGLGFSIAGGTDNPHIGDDPGIFITKIIPGAAAED  
GRLRVNDCILRVNEVDVSEVSHSKAVEALKEAGSIVRLYVRRRRPILETVVEIKLFGK  
PKGLGFSIAGGVGNQHIPGDNSIYVTKIIDGAAQKDGRLQVGDRLLMVNNYSLEEV  
HEEAVALKNTSEVYLVKVGKPTTIYMTDPYGPDPDITHSYSPPMENHLLSGNNGTLEY  
KTS L PPI SPGRYSPIPKHMLVDDDYTRPPEPVYSTVNKLCDKPASP RHYSPVECDKSF  
LLSAPYSHYHLGLLPDSEMTSHSQHSTATRQPSMTLQRAVSLEGEPRKVVHLKGSTGL  
GFNIVGGEDGEGIFVSFILAGGPADLSGELQRGDQILSVNGIDLRGASHEQAAAALKG  
AGQTVTIIAQYQPEDYARFEAKIHDLREQMMNHSMSSGSGSLRTNQKRSLYVRAMFDY  
DKSKDSGLPSQGLSFKYGDILHVINASDDEWQARRVMLEGDSEEMGVIPSKRRRVERK  
ERARLKTVKFNAKPGVIDSKGSFNDKRKKSFIKSRKFPFYKNKEQSEQETS DPEQHVS  
SNASDSESSYRGQEDLILSYEPVTRQEINYTRPVIIILGPMKDRINDDLISEFPDKFGS  
CVPHTTRPKRDYEVDRDYHFVISREQMEKDIQEHKFIEAGQYNDNLYGTSVQSVRFV  
AERGKHCILDVSGNAIKRLQVAQLYPIAIFIKPRSLEPLMEMNKRLTEEQAkkTYDRA  
IKLEQEFGEYFTAIVQGDTLEDIYNQCKLVIEEQSGPFIWIPSKEKL

|    | start | end | width | seq                                         | name       |
|----|-------|-----|-------|---------------------------------------------|------------|
| 1  | 1     | 34  | 34    | MSPVVKDPCFTPMICHCKVACTNNTLSLMFGCK           | CFEin7_cds |
| 2  | 34    | 87  | 54    | KYRYQDEDAPHDHS L PRLT. .SQIENVHGYVLQSHISPLK | exon 8     |
| 3  | 88    | 105 | 18    | ASPAPIIVNTDTLDTIPY                          | exon 11    |
| 4  | 106   | 122 | 17    | VNGTEIEYEFEEITLER                           | exon 12    |
| 5  | 123   | 163 | 41    | GNSGLGFSIAGGTDNPHIG. .GIFITKIIPGAAAEDGRL    | exon 13    |
| 6  | 164   | 164 | 1     | R                                           |            |
| 7  | 165   | 220 | 56    | VNDCILRVNEVDVSEVSHS. .RRRPILETVVEIKLFGKPK   | exon 14    |
| 8  | 221   | 221 | 1     | G                                           |            |
| 9  | 222   | 266 | 45    | LGFSIAGGVGNQHIPGDNS. .DGGAAQKDGRLQVGDRLLM   | exon 15    |
| 10 | 267   | 314 | 48    | VNNYSLEEVTHEEAVALK. .GKPTTIYMTDPYGPDPDITH   | exon 16    |
| 11 | 315   | 315 | 1     | S                                           |            |
| 12 | 316   | 360 | 45    | YSPPMENHLLSGNNGTLEY. .SPGRYSPIPKHMLVDDDYT   | exon 17    |
| 13 | 361   | 361 | 1     | R                                           |            |
| 14 | 362   | 412 | 51    | PPEPVYSTVNKLCDKPASP. .LSAPYSHYHLGLLPDSEMT   | exon 18    |
| 15 | 413   | 413 | 1     | S                                           |            |
| 16 | 414   | 435 | 22    | HSQHSTATRQPSMTLQRAVSLE                      | exon 19    |

|    |     |     |    |                                           |                           |          |
|----|-----|-----|----|-------------------------------------------|---------------------------|----------|
| 17 | 436 | 436 | 1  |                                           | G                         |          |
| 18 | 437 | 488 | 52 | EPRKVVHLHKGSTGLGFNIV..AGGPADLSGELQRGDQILS |                           | exon 20  |
| 19 | 489 | 522 | 34 | VNGIDLRGASHEQAAAALKGAGQTVTIIAQYQPE        |                           | exon 21  |
| 20 | 523 | 523 | 1  |                                           | D                         |          |
| 21 | 524 | 537 | 14 |                                           | YARFEAKIHDLREQ            | exon 23a |
| 22 | 538 | 560 | 23 |                                           | MMNHSMSSGSGSLRTNQKRSLYV   | exon 23b |
| 23 | 561 | 561 | 1  |                                           | R                         |          |
| 24 | 562 | 619 | 58 | AMFDYDKSKDSGLPSQGLS..RRVMLEGDSEEMGVIPSKR  |                           | exon 24  |
| 25 | 620 | 620 | 1  |                                           | R                         |          |
| 26 | 621 | 645 | 25 |                                           | VERKERARLKTVKFNAKPGVIDSKG | exon 25  |
| 27 | 646 | 678 | 33 | SFNDKRKKSFIKSRKFFPKYKKEQSEQETS DPE        |                           | exon 26  |
| 28 | 679 | 679 | 1  |                                           | Q                         |          |
| 29 | 680 | 692 | 13 |                                           | HVSSNASDSESSY             | exon 28  |
| 30 | 693 | 693 | 1  |                                           | R                         |          |
| 31 | 694 | 709 | 16 |                                           | GQEDLILSYEPVTRQE          | exon 29  |
| 32 | 710 | 710 | 1  |                                           | I                         |          |
| 33 | 711 | 743 | 33 | NYTRPVIILGPMKDRINDDLISEFPDKFGSCVP         |                           | exon 30  |
| 34 | 744 | 744 | 1  |                                           | H                         |          |
| 35 | 745 | 801 | 57 | TTRPKRDYEVDGRDYHFVI..YNDNLYGTSVQSVRFVAER  |                           | exon 31  |
| 36 | 802 | 837 | 36 | GKHCILDVSGNAIKRLQVAQLYPIAIFIKPRSLEPL      |                           | exon 32  |
| 37 | 838 | 838 | 1  |                                           | M                         |          |
| 38 | 839 | 868 | 30 | EMNKRLTEEQAkkTYDRAIKLEQEFGEYFT            |                           | exon 33  |
| 39 | 869 | 869 | 1  |                                           | A                         |          |
| 40 | 870 | 903 | 34 | IVQGDTLEDIYNQCKLVIEEQSGPFIWIPSKEKL        |                           | exon 34  |

**XP\_016872761**

>XP\_016872761

MSPVVKDPCFTPMICHCKVACTNNTLSLMFGCKYRYQDEDAPH  
DHSLPRLTHEVRGPELVHVSEKNLSQIENVHGYVLQSHISPLKASPAPIIVNTDTLDT  
IPYVNGTEIEYEFEEITLERGNSGLGFSIAGGTDNPHIGDDPGIFITKIIPGGAAAED  
GRLRVNDCILRVNEVDVSEVSHSKAVEALKEAGSIVRLYVRRRRPILETVVEIKLFGK  
PKGLGFSIAGGVGNQHIPGDNSIYVTKIIDGAAQKDGRLQVGDRLLMVNNYSLEEV  
HEEAVALKNTSEVVYLKVGKPTTIYMTDPYGPDPDITHSYSPPMENHLLSGNNGTLEY  
KTSLPPISPGRYSPIPKHMLVDDDYTRPPEPVYSTVNKLCDKPASPRHYSFVECDKSF  
LLSAPYSHYHLGLLPDSEMTSHSQHSTATRQPSMTLQRAVSLEGEPRKVVHLHKGSTGL  
GFNIVGGEDGEGIFVSFILAGGPADLSGELQRGDQILSVNGIDLRGASHEQAAAALKG  
AGQTVTIIAQYQPEDYARFEAKIHDLREQMMNHSMSSGSGSLRTNQKRSLYVRAMFDY  
DKSKDSGLPSQGLSFYKGDILHVINASDDEWWQARRVMLEGDSEEMGVIPSKRRRVERK  
ERARLKTVKFNAKPGVIDSKGDIPGLGDDGYGKTLRGQEDLILSYEPVTRQEINYTR  
PVIILGPMKDRINDDLISEFPDKFGSCVPHTTRPKRDYEVDGRDYHFVISREQMEKDI  
QEHKFIEAGQYNDNLYGTSVQSVRFVAERGKHCILDVSGNAIKRLQVAQLYPIAIFIK  
PRSLEPLMEMNKRLTEEQAkkTYDRAIKLEQEFGEYFTAIVQGDTLEDIYNQCKLVIE  
EQSGPFIWIPSKEKL

|    | start | end | width | seq                                      | name       |
|----|-------|-----|-------|------------------------------------------|------------|
| 1  | 1     | 34  | 34    | MSPVVKDPCFTPMICHCKVACTNNTLSLMFGCK        | CFEin7_cds |
| 2  | 34    | 87  | 54    | KYRYQDEDAPHDHSLPRLT..SQIENVHGYVLQSHISPLK | exon 8     |
| 3  | 88    | 105 | 18    | ASPAPIIVNTDTLDTIPY                       | exon 11    |
| 4  | 106   | 122 | 17    | VNGTEIEYEFEEITLER                        | exon 12    |
| 5  | 123   | 163 | 41    | GNSGLGFSIAGGTDNPHIG..GIFITKIIPGGAAAEDGRL | exon 13    |
| 6  | 164   | 164 | 1     | R                                        |            |
| 7  | 165   | 220 | 56    | VNDCILRVNEVDVSEVSHS..RRRPILETVVEIKLFGKPK | exon 14    |
| 8  | 221   | 221 | 1     | G                                        |            |
| 9  | 222   | 266 | 45    | LGFSIAGGVGNQHIPGDNS..DGGAAQKDGRLQVGDRLLM | exon 15    |
| 10 | 267   | 314 | 48    | VNNYSLEEVTHEEAVALK..GKPTTIYMTDPYGPDPDITH | exon 16    |
| 11 | 315   | 315 | 1     | S                                        |            |

|    |     |     |    |                                           |          |
|----|-----|-----|----|-------------------------------------------|----------|
| 12 | 316 | 360 | 45 | YSPPMENHLLSGNNGTLEY..SPGRYSPIPKHMLVDDDDYT | exon 17  |
| 13 | 361 | 361 | 1  | R                                         |          |
| 14 | 362 | 412 | 51 | PPEPVYSTVKNKCDKPASP..LSAPYSHYHLGLLPDSEMT  | exon 18  |
| 15 | 413 | 413 | 1  | S                                         |          |
| 16 | 414 | 435 | 22 | HSQHSTATRQPSMTLQRAVSLE                    | exon 19  |
| 17 | 436 | 436 | 1  | G                                         |          |
| 18 | 437 | 488 | 52 | EPRKVVHLHKGSTGLGFNIV..AGGPADLSGELQRGDQILS | exon 20  |
| 19 | 489 | 522 | 34 | VNGIDLRGASHEQAAAAALKGAGQTVTIIAQYQPE       | exon 21  |
| 20 | 523 | 523 | 1  | D                                         |          |
| 21 | 524 | 537 | 14 | YARFEAKIHDLREQ                            | exon 23a |
| 22 | 538 | 560 | 23 | MMNHSMSSGSGSLRTNQKRSLYV                   | exon 23b |
| 23 | 561 | 561 | 1  | R                                         |          |
| 24 | 562 | 619 | 58 | AMFDYDKSKDSGLPSQGLS..RRVMLEGDSEEMGVIPSKR  | exon 24  |
| 25 | 620 | 620 | 1  | R                                         |          |
| 26 | 621 | 645 | 25 | VERKERARLKTVKFNAKPGVIDSKG                 | exon 25  |
| 27 | 646 | 660 | 15 | DIPGLGDDGYGTKTL                           | exon 27  |
| 28 | 661 | 661 | 1  | R                                         |          |
| 29 | 662 | 677 | 16 | GQEDLILSYEPVTRQE                          | exon 29  |
| 30 | 678 | 678 | 1  | I                                         |          |
| 31 | 679 | 711 | 33 | NYTRPVIIILGPMKDRINDDLISEFPDKFGSCVP        | exon 30  |
| 32 | 712 | 712 | 1  | H                                         |          |
| 33 | 713 | 769 | 57 | TTRPKRDYEVDGRDYHFVI..YNDNLYGTSVQSVRFVAER  | exon 31  |
| 34 | 770 | 805 | 36 | GKHCILDVSGNAIKRLQVAQLYPIAIFIKPRSLEPL      | exon 32  |
| 35 | 806 | 806 | 1  | M                                         |          |
| 36 | 807 | 836 | 30 | EMNKRLTEEQAKKTYDRAIKLEQEFGEYFT            | exon 33  |
| 37 | 837 | 837 | 1  | A                                         |          |
| 38 | 838 | 871 | 34 | IVQGDTLEDIYNQCKLVIEEQSGPFIWIPSKEKL        | exon 34  |

## Supplementary Note 6

We report the forward (F) primers used in [12] to target *Dlg2* isoform in brain mouse, along with their BLAST alignments in the mouse genome reference.

### RT-PCR primers

#### PSD-93 zeta F (Q91XM9-7)

Mus musculus strain C57BL/6J chromosome 7, GRCm38.p4 C57BL/6J  
Sequence ID: NC\_000073.6 Length: 145441459 Number of Matches: 248  
Range 1: 90504814 to 90504835  
Alignment statistics for match #1  
Score Expect Identities Gaps Strand  
44.1 bits(22) 8e-04 22/22(100%) 0/22(0%) Plus/Plus  
Features:  
disks large homolog 2 isoform X8  
disks large homolog 2 isoform X3

```
Query 1          CGAGCTTTGTCATTACTGGAGG 22
                |||
Sbjct 90504814  CGAGCTTTGTCATTACTGGAGG 90504835
```

#### PSD-93 epsilon F (Q91XM9-6)

Mus musculus strain C57BL/6J chromosome 7, GRCm38.p4 C57BL/6J  
Sequence ID: NC\_000073.6 Length: 145441459 Number of Matches: 548  
Range 1: 91542839 to 91542861  
Alignment statistics for match #1  
Score Expect Identities Gaps Strand  
46.1 bits(23) 2e-04 23/23(100%) 0/23(0%) Plus/Plus  
Features:  
disks large homolog 2 isoform X8  
disks large homolog 2 isoform X3

```
Query 1          GCCAACTGGATGTGTGTGAGCCG 23
                |||
Sbjct 91542839  GCCAACTGGATGTGTGTGAGCCG 91542861
```

#### PSD-93 beta F (Q91XM9-2)

Mus musculus strain C57BL/6J chromosome 7, GRCm38.p4 C57BL/6J  
Sequence ID: NC\_000073.6 Length: 145441459 Number of Matches: 12  
Range 1: 91262788 to 91262809  
Alignment statistics for match #1  
Score Expect Identities Gaps Strand  
36.2 bits(18) 0.19 21/22(95%) 0/22(0%) Plus/Plus  
Features:  
disks large homolog 2 isoform X8  
disks large homolog 2 isoform X3

```
Query 1          AGCTGCCGCTCGGTCTAGGCTG 22
                |||
Sbjct 91262788  AGCTGCCGCTCTGTCTAGGCTG 91262809
```

#### PSD-93 gamma F (Q91XM9-3)

Mus musculus strain C57BL/6J chromosome 7, GRCm38.p4 C57BL/6J  
Sequence ID: NC\_000073.6 Length: 145441459 Number of Matches: 202

Range 1: 91711767 to 91711790

Alignment statistics for match #1

Score Expect Identities Gaps Strand

40.1 bits(20) 0.017 23/24(96%) 0/24(0%) Plus/Plus

Features:

disks large homolog 2 isoform X8

disks large homolog 2 isoform X3

```
Query 1          GTGAAGAAGCTATGCAACATGCGT 24
                |||
Sbjct 91711767  GTGAAGAAGCTATGCAACACGCGT 91711790
```

## Supplementary Note 7

Regarding CNVs belonging to GDD/ID datasets and affecting *DLG2* gene, we performed an enrichment analysis comparing cases and controls populations on (not) affecting any HPs. We discarded from cases *nssv3460188\_unk* (15mbp longer), *nssv3461505\_unk* (affecting many other genes on the right-size of *DLG2*); from control dataset a large serie of patients bearing a small common CNV (Figure S6): *nssv3502892\_unk*, *nssv3510377\_unk*, *nssv3510893\_unk*, *nssv3519923\_unk*, *nssv3504449\_unk*, *nssv3504011\_unk*, *nssv3511347\_unk*, *nssv3512973\_unk*, *nssv3520252\_unk*, *nssv3522055\_unk*, *nssv3710675\_unk*, *nssv3710676\_unk*, *nssv3710677\_unk*, *nssv3710678\_unk*, *nssv3710679\_unk*, *nssv3710680\_unk*, *nssv3512285\_unk*, *nssv779859\_unk*, *nssv779860\_unk*, *nssv1176187\_unk*, *nssv779861\_unk*, *nssv779862\_unk*, *nssv779863\_unk*, *nssv779865\_unk*, *nssv779866\_unk*.

## Supplementary Note 8

We used the following Array-CGH method to diagnose the ULB patients:

- TYPE: whole genome analysis on Agilent oligonucleotide probe array
- SLIDE: Cytochip oligo 4x180K ISCA (Bluegenome)
- ANALYSIS PROGRAM: BlueFuse Multi (Bluegenome)
- RESOLUTION: average resolution on genome: 200kbp. Resolution increased in pathogenic regions defined by “International Standard Cytogenomic Array” consortium (ISCA)
- GENOME ASSEMBLY: hg19/GRCh37



## Supplementary Note 9

Here below are reported the patients mentioned in the discussion section. In the recent DECIPHER version (December 2016) there are five additional patients with deletions in *DLG2*. Patients 257014 and 314659 have NDD phenotypes, while for patients 325807 and 331366 clinical data is missing. We do not consider patient 301626 because its deletion affecting *DLG2* also alters nearby genes. From the independent Signature Genomic Laboratories dataset [13], six patients were reported with deletions affecting *DLG2*. Three patients (GC8406, GC33254, GC43330) are reported with cognitive phenotype and one with anxiety disorder at 5 years old (GC53207).

## Supplementary Note 10

### Q91XM9-3 (PSD-93 gamma)

Unmapped amino acid sequence (first 34 amino acids).

>

MQRPSVSR AENYQLLWDTIASLKQCEQAMQHAFIP

TBLASTN to *Mus musculus* (taxid:10090) reported one relevant mapping, chr7:91711694-91711798.

*Mus musculus* chromosome 7, clone RP24-69L13, complete sequence

Sequence ID: AC121261.9 Length: 163319 Number of Matches: 1

Range 1: 68556 to 68660

Alignment statistics for match #1

Score Expect Method Identities Positives Gaps Frame

73.2 bits(178) 1e-15 Compositional matrix adjust. 33/35(94%) 34/35(97%) 0/35(0%) +3

```
Query 1      MQRPSVSR AENYQLLWDTIASLKQCEQAMQHAFIP 35
            MQRPS SRAENYQLLWDTIASLKQCE+AMQHAFIP
Sbjct 68556  MQRPSASRAENYQLLWDTIASLKQCEEAMQHAFIP 68660
```

Subject sequence

>AC121261.9 *Mus musculus* chromosome 7, clone RP24-69L13, complete sequence

ATGCAACGGCCAAGTGCTTCCCGAGCTGAGAATTATCAGCTTCTGTGGGATACAATTGCTTCTTTAAAACAATGTGAAGA  
AGCTATGCAACACGCGTTCATTCCG

BLASTN result

*Mus musculus* strain C57BL/6J chromosome 7, GRCm38.p4 C57BL/6J

Sequence ID: NC\_000073.6 Length: 145441459 Number of Matches: 2

Range 1: 91711694 to 91711798

Alignment statistics for match #1

Score Expect Identities Gaps Strand

190 bits(210) 9e-47 105/105(100%) 0/105(0%) Plus/Plus

Features:

disks large homolog 2 isoform X8

disks large homolog 2 isoform X3

```
Query 1      ATGCAACGGCCAAGTGCTTCCCGAGCTGAGAATTATCAGCTTCTGTGGGATACAATTGCT 60
            |
Sbjct 91711694 ATGCAACGGCCAAGTGCTTCCCGAGCTGAGAATTATCAGCTTCTGTGGGATACAATTGCT 91711753

Query 61     TCTTTAAAACAATGTGAAGAAGCTATGCAACACGCGTTCATTCCG 105
            |
Sbjct 91711754 TCTTTAAAACAATGTGAAGAAGCTATGCAACACGCGTTCATTCCG 91711798
```

### Q91XM9-7 (PSD-93 zeta)

Unmapped amino acid sequence (first 156 amino acids).

>

MPVKKKDTDRALSLLEEYCKKLRKPEEQLLKNAVKKVMSIFKSSLFQALLDIQEFYEVTLNLSQKSCEQKIEEАНHVAQK  
WEKTLLLDSCRDSLQKSSEHASCSGPKENALYIEQNKENQSENETEETCQNQGKCPAQNC SVEAPT WMPVHHCT

TBLASTN to *Mus musculus* (taxid:10090) reported four relevant mappings. For each one we completed the analysis with the its genomic coordinates in mm10.

**First region, mapping into chr7:90504805-90504936 (mm10)**

TBLASTN result

Mus musculus BAC clone RP24-335H15 from 7, complete sequence

Sequence ID: AC122002.2 Length: 114070 Number of Matches: 1

Range 1: 93663 to 93800

Next Match

Previous Match

Alignment statistics for match #1

Score Expect Method Identities Positives Gaps Frame

89.4 bits(220) 4e-19 Compositional matrix adjust. 44/46(96%) 45/46(97%) 0/46(0%) -3

```

Query 7      DTDRALSLLEEYCKLRKPEEQLLKNAVKKVMSIFKSSLFQALLDI 52
              DTDRALSLLEEYCKLRKPEEQLLKNAVKKVMSIFKSSLFQALL +
Sbjct 93800 DTDRALSLLEEYCKLRKPEEQLLKNAVKKVMSIFKSSLFQALLGM 93663

```

Subject sequence

>AC122002.2 Mus musculus BAC clone RP24-335H15 from 7, complete sequence

GATACTGACCGAGCTTTGTCATTACTGGAGGAATACTGCAAAAAATTAAGAAAGCCTGAGGAACAGCTGTTGAAAAATGC  
TGTGAAAAAGGTGATGAGTATTTTCAAGAGCAGCTTATTTCAAGCCTTACTGGGTATG

Subject sequence having perfect match (last 44 amino acids to nucleotides)

>

GATACTGACCGAGCTTTGTCATTACTGGAGGAATACTGCAAAAAATTAAGAAAGCCTGAGGAACAGCTGTTGAAAAATGC  
TGTGAAAAAGGTGATGAGTATTTTCAAGAGCAGCTTATTTCAAGCCTTACTG

BLASTN result

Mus musculus strain C57BL/6J chromosome 7, GRCm38.p4 C57BL/6J

Sequence ID: NC\_000073.6 Length: 145441459 Number of Matches: 2

Range 1: 90504805 to 90504936

Alignment statistics for match #1

Score Expect Identities Gaps Strand

239 bits(264) 3e-61 132/132(100%) 0/132(0%) Plus/Plus

Features:

disks large homolog 2 isoform X8

disks large homolog 2 isoform X3

```

Query 1      GATACTGACCGAGCTTTGTCATTACTGGAGGAATACTGCAAAAAATTAAGAAAGCCTGAG 60
              |||
Sbjct 90504805 GATACTGACCGAGCTTTGTCATTACTGGAGGAATACTGCAAAAAATTAAGAAAGCCTGAG 90504864

Query 61     GAACAGCTGTTGAAAAATGCTGTGAAAAAGGTGATGAGTATTTTCAAGAGCAGCTTATTT 120
              |||
Sbjct 90504865 GAACAGCTGTTGAAAAATGCTGTGAAAAAGGTGATGAGTATTTTCAAGAGCAGCTTATTT 90504924

Query 121    CAAGCCTTACTG 132
              |||
Sbjct 90504925 CAAGCCTTACTG 90504936

```

**Second region, mapping into chr7:90731894-90732040 (mm10)**

TBLASTN result

Mus musculus chromosome 7, clone RP24-136D20, complete sequence

Sequence ID: AC101784.7 Length: 169423 Number of Matches: 1

Range 1: 133447 to 133593

Next Match

Previous Match

Alignment statistics for match #1

Score Expect Method Identities Positives Gaps Frame

99.8 bits(247) 8e-23 Compositional matrix adjust. 49/49(100%) 49/49(100%) 0/49(0%) +1

Query 51 DIQEFYEVTLNSQKSCEQKIEEАНHVAQKWEKTLLLDSCRDSLQKSSE 99
DIQEFYEVTLNSQKSCEQKIEEАНHVAQKWEKTLLLDSCRDSLQKSSE
Sbjct 133447 DIQEFYEVTLNSQKSCEQKIEEАНHVAQKWEKTLLLDSCRDSLQKSSE 133593

Subject sequence

>AC101784.7 Mus musculus chromosome 7, clone RP24-136D20, complete sequence
GATATTCAAGAATTTTATGAGGTAACGCTATTAАААТТCTCAААААGTTGCGAGCAGAAGATAGAAGAAGCCAATCACGT
GGCACAGAAATGGGAGAAGACTCTCCTCCTTGATTСATGTСGTGACAGTCTTCAААААТCCTCAGAG

BLASTN result

>AC101784.7 Mus musculus chromosome 7, clone RP24-136D20, complete sequence
GATATTCAAGAATTTTATGAGGTAACGCTATTAАААТТCTCAААААGTTGCGAGCAGAAGATAGAAGAAGCCAATCACGT
GGCACAGAAATGGGAGAAGACTCTCCTCCTTGATTСATGTСGTGACAGTCTTCAААААТCCTCAGAG

Mus musculus strain C57BL/6J chromosome 7, GRCm38.p4 C57BL/6J
Sequence ID: NC\_000073.6 Length: 145441459 Number of Matches: 2
Range 1: 90731894 to 90732040

Next Match

Previous Match

Alignment statistics for match #1

Score Expect Identities Gaps Strand

266 bits(294) 2e-69 147/147(100%) 0/147(0%) Plus/Plus

Features:

disks large homolog 2 isoform X8

disks large homolog 2 isoform X3

Query 1 GATATTCAAGAATTTTATGAGGTAACGCTATTAАААТТCTCAААААGTTGCGAGCAGAAG 60
Sbjct 90731894 GATATTCAAGAATTTTATGAGGTAACGCTATTAАААТТCTCAААААGTTGCGAGCAGAAG 90731953
Query 61 ATAGAAGAAGCCAATCACGTGGCACAGAAATGGGAGAAGACTCTCCTCCTTGATTСATGT 120
Sbjct 90731954 ATAGAAGAAGCCAATCACGTGGCACAGAAATGGGAGAAGACTCTCCTCCTTGATTСATGT 90732013
Query 121 CGTGACAGTCTTCAААААТCCTCAGAG 147
Sbjct 90732014 CGTGACAGTCTTCAААААТCCTCAGAG 90732040

Third region, mapping into chr7:90852668-90852763 (mm10)

TBLASTN result

Mus musculus BAC clone RP24-267C3 from chromosome 7, complete sequence

Sequence ID: AC140196.3 Length: 183537 Number of Matches: 2

Range 1: 139802 to 140005

Alignment statistics for match #1 Score Expect Method Identities Positives Gaps Frame

72.0 bits(175) 4e-13 Compositional matrix adjust. 43/69(62%) 48/69(69%) 7/69(10%) -3

Query 69 QKIEEАНHVAQKWEKTLLLDSCRDSLQ--KSSE----HASCSPKENALYIEQNKENQCS 122
Q ++ HV + W KTL L+ S+ SS HASCSPKENALYIEQNKENQCS
Sbjct 140005 QALDVLRHVLKSW-KTLNLNRYRNVSIDF\*TSSSLPL\*HASCSPKENALYIEQNKENQCS 139829

Query 123 ENETEEKTC 131  
ENETEEKTC  
Sbjct 139828 ENETEEKTC 139802

Subject sequence

>AC140196.3 Mus musculus BAC clone RP24-267C3 from chromosome 7, complete sequence  
CAGGCTTTAGATGTTTTAAGGCATGTGTTAAAATCTTGGAAAACACTTAATTTGAATTACAGAAACGTAAGTATTGATTT  
TTAAACTTCTTCTCCCTCCCTCTTTAGCATGCAAGTTGCAGTGGGCCAAAGGAAAATGCTTTATACATTGAGCAAATA  
AAGAAAACCAGTGTCTGAGAATGAACTGAAGAAAAGACGTGT

Subject sequence having perfect match (44 amino acids to nucleotides)

>  
CATGCAAGTTGCAGTGGGCCAAAGGAAAATGCTTTATACATTGAGCAAATAAAGAAAACCAGTGTCTGAGAATGAAAC  
TGAAGAAAAGACGTGT

BLASTN result

Mus musculus strain C57BL/6J chromosome 7, GRCm38.p4 C57BL/6J  
Sequence ID: NC\_000073.6 Length: 145441459 Number of Matches: 2  
Range 1: 90852668 to 90852763  
Alignment statistics for match #1  
Score Expect Identities Gaps Strand  
174 bits(192) 7e-42 96/96(100%) 0/96(0%) Plus/Plus  
Features:  
disks large homolog 2 isoform X8  
disks large homolog 2 isoform X3

Query 1 CATGCAAGTTGCAGTGGGCCAAAGGAAAATGCTTTATACATTGAGCAAATAAAGAAAAC 60  
|||||  
Sbjct 90852668 CATGCAAGTTGCAGTGGGCCAAAGGAAAATGCTTTATACATTGAGCAAATAAAGAAAAC 90852727  
  
Query 61 CAGTGTCTGAGAATGAACTGAAGAAAAGACGTGT 96  
|||||  
Sbjct 90852728 CAGTGTCTGAGAATGAACTGAAGAAAAGACGTGT 90852763

**Fourth region, mapping into chr7:90915460-90915534 (mm10)**

TBLASTN result

Mus musculus BAC clone RP24-267C3 from chromosome 7, complete sequence  
Sequence ID: AC140196.3 Length: 183537 Number of Matches: 2  
Range 2: 77031 to 77105  
Alignment statistics for match #2  
Score Expect Method Identities Positives Gaps Frame  
61.2 bits(147) 2e-09 Compositional matrix adjust. 25/25(100%) 25/25(100%) 0/25(0%) -2

Query 132 QNQGKCPAQNCSVEAPTWMPVHHCT 156  
QNQGKCPAQNCSVEAPTWMPVHHCT  
Sbjct 77105 QNQGKCPAQNCSVEAPTWMPVHHCT 77031

Subject sequence

>AC140196.3 Mus musculus BAC clone RP24-267C3 from chromosome 7, complete sequence  
CAAAACCAAGGCAAATGCCAGCCGAGAACTGTTTCAGTGGAAAGCCCCTACCTGGATGCCTGTCCACCACTGTACT

BLASTN result

Mus musculus strain C57BL/6J chromosome 7, GRCh38.p4 C57BL/6J  
Sequence ID: NC\_000073.6 Length: 145441459 Number of Matches: 2  
Range 1: 90915460 to 90915534

Alignment statistics for match #1

Score Expect Identities Gaps Strand

136 bits(150) 1e-30 75/75(100%) 0/75(0%) Plus/Plus

Features:

disks large homolog 2 isoform X8

disks large homolog 2 isoform X3

```
Query 1          CAAAACCAAGGCAAATGCCAGCCAGAACTGTTTCAGTGAAGCCCCTACCTGGATGCCT 60
                |||
Sbjct 90915460   CAAAACCAAGGCAAATGCCAGCCAGAACTGTTTCAGTGAAGCCCCTACCTGGATGCCT 90915519

Query 61         GTCCACCACTGTACT 75
                |||
Sbjct 90915520   GTCCACCACTGTACT 90915534
```

## References

- [1] Cooper, G. M., Coe, B. P., Girirajan, S., Rosenfeld, J. A., Vu, T. H., Baker, C., Williams, C., Stalker, H., Hamid, R., Hannig, V., et al. (2011). A copy number variation morbidity map of developmental delay. *Nat. Genet.* *43*, 838–846.
- [2] Coe, B. P., Witherspoon, K., Rosenfeld, J. A., van Bon, B. W. M., Vulto-van Silfhout, A. T., Bosco, P., Friend, K. L., Baker, C., Buono, S., Vissers, L. E. L. M., et al. (2014). Refining analyses of copy number variation identifies specific genes associated with developmental delay. *Nat Genet* *46*, 1063–1071.
- [3] Yao, P., Lin, P., Gokoolparsadh, A., Assareh, A., Thang, M. W. C., and Voineagu, I. (2015). Coexpression networks identify brain region-specific enhancer RNAs in the human brain. *Nature neuroscience* *18*, 1168–1174.
- [4] Scotti, M. M. and Swanson, M. S. (2016). RNA mis-splicing in disease. *Nat. Rev. Genet.* *17*, 19–32.
- [5] Padgett, R. A. (2012). New connections between splicing and human disease. *Trends Genet.* *28*, 147–154.
- [6] Sakharkar, M. K., Chow, V. T., and Kanguene, P. (2004). Distributions of exons and introns in the human genome. *In Silico Biol. (Gedrukt)* *4*, 387–393.
- [7] Ameur, A., Zaghlool, A., Halvardson, J., Wetterbom, A., Gyllensten, U., Cavelier, L., and Feuk, L. (2011). Total RNA sequencing reveals nascent transcription and widespread co-transcriptional splicing in the human brain. *Nat Struct Mol Biol* *18*, 1435–1440.
- [8] Souvorov, A., Kapustin, Y., Kiryutin, B., Chetvernin, V., Tatusova, T., and Lipman, D. (2010). Gnomon the NCBI eukaryotic gene prediction tool. Accessed Dec 2016.
- [9] Stamatoyannopoulos, J. A. (2010). Illuminating eukaryotic transcription start sites. *Nature methods* *7*, 501–503.
- [10] Sudmant, P. H., Rausch, T., Gardner, E. J., Handsaker, R. E., Abyzov, A., Huddleston, J., Zhang, Y., Ye, K., Jun, G., Hsi-Yang Fritz, M., et al. (2015). An integrated map of structural variation in 2,504 human genomes. *Nature* *526*, 75–81.
- [11] Dousse, A., Junier, T., and Zdobnov, E. M. (2015). CEGA—a catalog of conserved elements from genomic alignments. *Nucleic acids research*.
- [12] Parker, M. J. (2004). PSD93 Regulates Synaptic Stability at Neuronal Cholinergic Synapses. *Journal of Neuroscience* *24*, 378–388.
- [13] Sahoo, T., Theisen, A., Rosenfeld, J. A., Lamb, A. N., Ravnan, J. B., Schultz, R. A., Torchia, B. S., Neill, N., Casci, I., Bejjani, B. A., et al. (2011). Copy number variants of schizophrenia susceptibility loci are associated with a spectrum of speech and developmental delays and behavior problems. *Genetics in Medicine* *13*, 868–80.
